# Supplementary material for: Selective radical cascade (4+2) annulation with olefins towards the synthesis of chroman derivatives via organo-photoredox catalysis
Source: Royal Society of Chemistry journal article supplement (doi:10.1039/d2sc00903j), 2022-01-01

## **Supporting Information**

### **Selective Radical Cascade (4+2) Annulation with Olefins towards the Synthesis of Chroman Derivatives via Organo- Photoredox Catalysis**

Zhipeng Guan, Xingxing Zhong, Yayu Ye, Xiangwei Li, Hengjiang Cong, Hong Yi,  
Heng Zhang, Zhiliang Huang, Aiwen Lei

## **Table of Contents**

|                                   |    |
|-----------------------------------|----|
| General information .....         | 3  |
| Experimental Procedures .....     | 4  |
| Crystallography Data .....        | 6  |
| Characterization of Products..... | 22 |
| NMR Spectra of Products .....     | 46 |

## General information

All manipulations were carried out by standard schlenk techniques. Unless otherwise stated, analytical grade solvents and commercially available reagents were used to conduct the reactions. LED irradiation was accomplished using the blue photochemical reactors. Thin layer chromatography (TLC) employed glass 0.25 mm silica gel plates. Flash chromatography columns were packed with 200-300 mesh silica gel. Gradient flash chromatography was conducted and eluted with a continuous gradient from petroleum ether to ethyl acetate. All new compounds were characterized by  $^1\text{H}$  NMR,  $^{13}\text{C}$  NMR and HRMS. The known compounds were characterized by  $^1\text{H}$  NMR and  $^{13}\text{C}$  NMR.  $^1\text{H}$  NMR and  $^{13}\text{C}$  NMR spectra were recorded on a Bruker 400 MHz NMR spectrometer. The chemical shifts ( $\delta$ ) were given in part per million relative to internal tetramethyl silane (TMS, 0 ppm for  $^1\text{H}$  NMR),  $\text{CDCl}_3$  (77.16 ppm for  $^{13}\text{C}$  NMR) and  $\text{DMSO-d}_6$  (2.50 ppm for  $^1\text{H}$  NMR, 39.52 ppm for  $^{13}\text{C}$  NMR), respectively. High resolution mass spectra (HRMS) were measured with a Bruker UltiMate3000 & Compact instrument and accurate masses were reported for the molecular ion Hydrogen ( $\text{M}+\text{H}$ ) $^+$ . EPR spectra were recorded on a Bruker X-band A200 spectrometer. GC-MS spectra were recorded on Varian GC MS 3900-2100T or SHIMADZU GC MS-2010.

## Experimental Procedures

### 1. General Procedure for Synthesis of 1,3-dioxoisindolin-2-yl 2-methyl-2-phenoxypropanoate

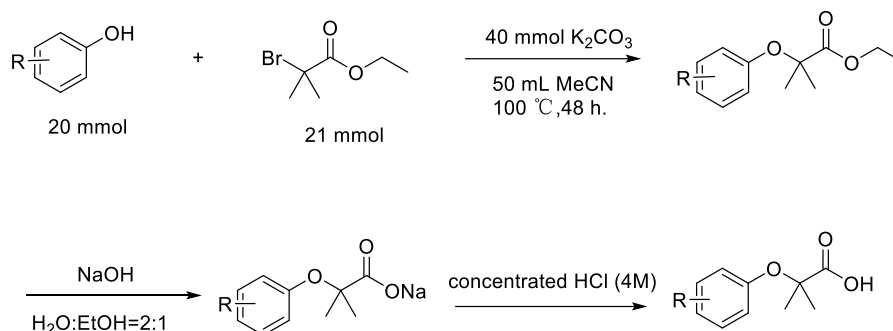

In a round-bottom flask with phenol (20 mmol) and K<sub>2</sub>CO<sub>3</sub> (40 mmol), acetonitrile (40 mL) was added to the mixture and the mixture was stirred vigorously. After Ethyl 2-bromo-2-methylpropanoate (21 mmol) was added, the reaction mixture was stirred at 100 °C for 48 hours. After completion of the reaction, the reaction system was quenched by aqueous solution. The aqueous solution was extracted with ethyl acetate (3 × 30 mL) and the combined extracts were dried with anhydrous Na<sub>2</sub>SO<sub>4</sub>. The solvents were removed under reduced pressure by rotary evaporation. Then, the pure product was obtained by flash column chromatography on silica gel (eluent: petroleum ether/ethyl acetate = 50:1). Adding 14 mmol NaOH, H<sub>2</sub>O (40 mL) and MeOH (20 mL) to the product until the product disappeared. The aqueous mixture was adjusted to pH=1 with concentrated HCl (4 M × 6 mL) and extracted with ethyl acetate (20 mL × 4). The combined extracts were washed with brine, dried with sodium sulfate and concentrated to give the target compound.

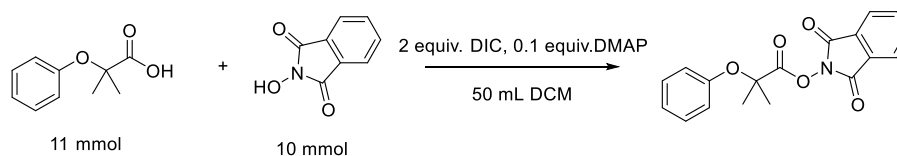

2-methyl-2-phenoxypropanoic acid (5.0 mmol), N-hydroxy-phthalimide (1.0 equiv), 4-Dimethylaminopyridine (DMAP, 0.1 equiv) and dichloromethane (50 mL) were placed in a round-bottom flask. Adding to the mixture. After stirring the mixture vigorously, N, N'-diisopropylcarbodiimide (DIC, 1.0 equiv) was added dropwise to the mixture and the mixture was stirred for 12 hours. After completion of the reaction, the product was identified by TLC. Rinse the mixture with additional CH<sub>2</sub>Cl<sub>2</sub>/Et<sub>2</sub>O. Remove the solvent under reduced pressure. The solvent was removed under reduced pressure by an aspirator, then the pure product was obtained by flash column chromatography on silica gel (silica gel, 10:1 petroleum ether : EtOAc).

## 2. General Procedure for Organo-Photoredox (4+2) Annulation with Alkenes

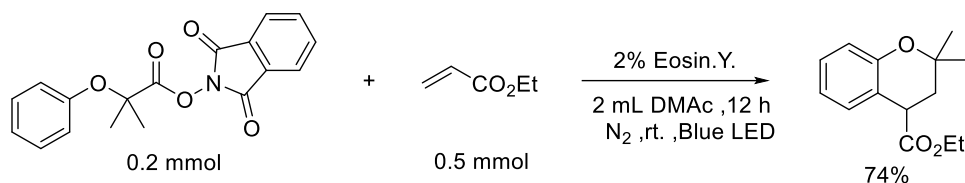

A solution of ethyl acrylate (0.5 mmol, 2.5 equiv), 1,3-dioxoisindolin-2-yl 2-methyl-2-phenoxypropanoate (0.2 mmol), and Eosin.Y (2%, 2.6 mg) in DMAc (2.0 mL) were stirred under nitrogen atmosphere and irradiated by 24 W blue LEDs at 25 °C for 12 h. After completion of the reaction, the reaction system was extracted by saturated NaCl aqueous solution. The aqueous solution was extracted with ethyl acetate (3 × 2 mL) and the combined extracts were dried with anhydrous Na<sub>2</sub>SO<sub>4</sub>. The solvents were removed under reduced pressure by rotary evaporation. Then, the pure product was obtained by flash column chromatography on silica gel (eluent: petroleum ether/ethyl acetate = 50:1).

## 3. General Procedure for Cyclic Voltammetry (CV)

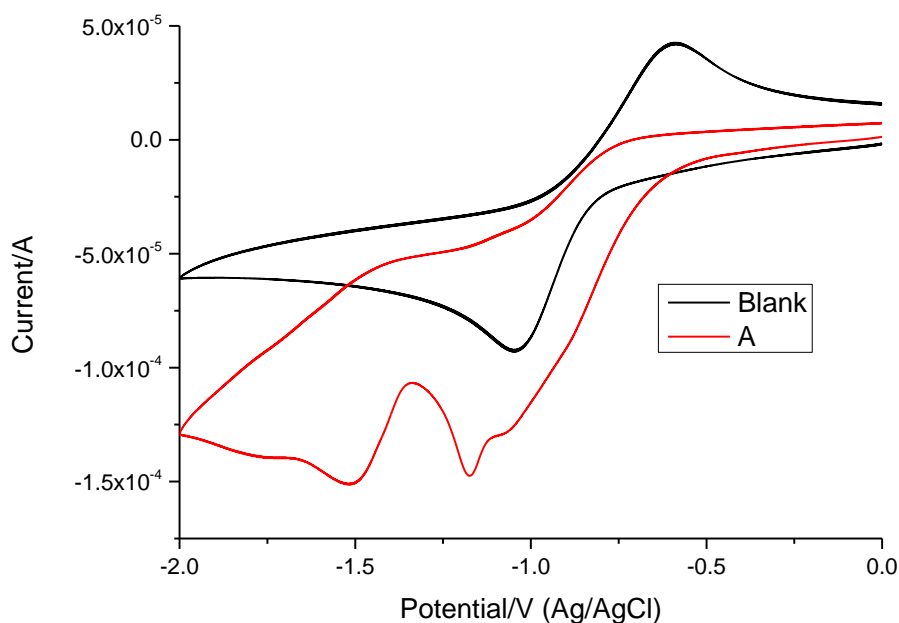

Cyclic voltammetry experiment was performed in a three-electrode cell connected to a Schlenk line under air at room temperature. The working electrode was a glass carbon electrode, the counter electrode a platinum wire. The reference was an Ag/AgCl electrode submerged in 10 ml DMAc, Corresponding undertested matter: 1,3-dioxoisindolin-2-yl 2-methyl-2-phenoxypropanoate (0.1 mmol), <sup>n</sup>Bu<sub>4</sub>NH<sub>4</sub>F<sub>4</sub> (0.5 mmol), in a three-electrode cell, solvent DMAc 10 mL containing <sup>n</sup>Bu<sub>4</sub>NH<sub>4</sub>F<sub>4</sub> (0.5 mmol) were poured into the electrochemical cell in all experiments. The scan rate is 0.1 V/s.

## Crystallography Data

Single crystal of the compounds were selected, mounted onto a cryoloop, and transferred in a cold nitrogen gasstream. Intensity data were collected with a BRUKER Kappa-APEXII diffractometer with graphite-monochromated Cu-K $\alpha$  radiation ( $\lambda = 0.71073 \text{ \AA}$ ). Data collection were performed with APEX2 suite (BRUKER). Unitcell parameters refinement, integration and data reduction were carried out with SAINT program (BRUKER). SADABS (BRUKER) was used for scaling and multi-scan absorption corrections. In the WinGX suite of programs, the structure were solved with Sir2014 program and refined by fullmatrix least-squares methods using SHELXL-14.

CCDC 2089433 contain the supplementary crystallographic data for this paper

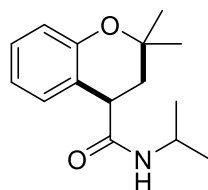

52

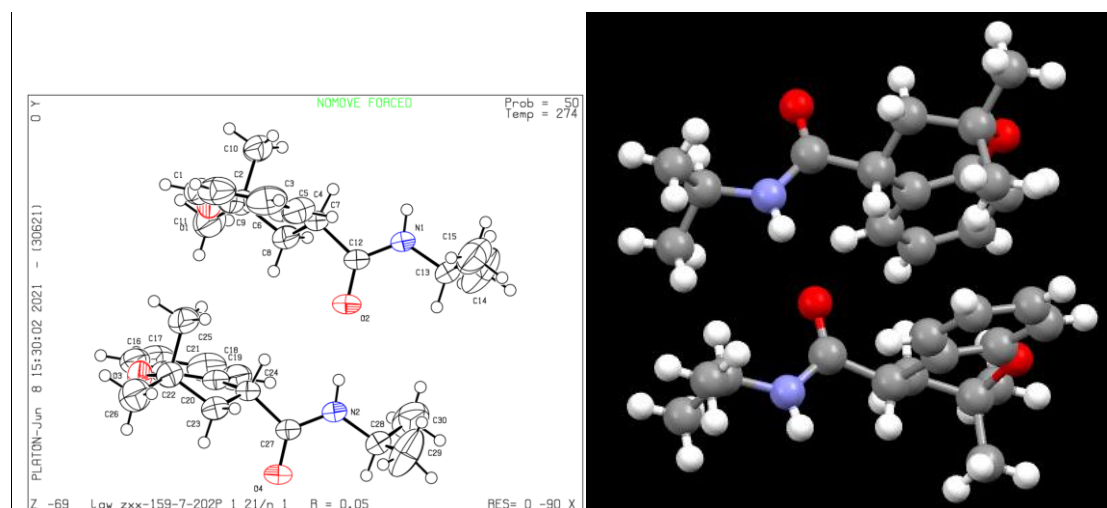

Table 1. Crystal data and structure refinement for final-LAW\_ZXX-159-7-20210524-rt.

|                      |                                                  |                               |
|----------------------|--------------------------------------------------|-------------------------------|
| Identification code  | law_zxx-159-7-20210524-rt                        |                               |
| Empirical formula    | C <sub>15</sub> H <sub>21</sub> N O <sub>2</sub> |                               |
| Formula weight       | 247.33                                           |                               |
| Temperature          | 274(2) K                                         |                               |
| Wavelength           | 1.54184 Å                                        |                               |
| Crystal system       | Monoclinic                                       |                               |
| Space group          | P 1 21/n 1                                       |                               |
| Unit cell dimensions | a = 9.77660(10) Å                                | $\alpha = 90^\circ$ .         |
|                      | b = 13.9140(2) Å                                 | $\beta = 97.7580(10)^\circ$ . |
|                      | c = 21.1903(3) Å                                 | $\gamma = 90^\circ$ .         |
| Volume               | 2856.17(6) Å <sup>3</sup>                        |                               |

|                                   |                                             |
|-----------------------------------|---------------------------------------------|
| Z                                 | 8                                           |
| Density (calculated)              | 1.150 Mg/m <sup>3</sup>                     |
| Absorption coefficient            | 0.600 mm <sup>-1</sup>                      |
| F(000)                            | 1072                                        |
| Crystal size                      | 0.05 x 0.04 x 0.03 mm <sup>3</sup>          |
| Theta range for data collection   | 3.811 to 71.709°.                           |
| Index ranges                      | -11<=h<=11, -16<=k<=17, -25<=l<=25          |
| Reflections collected             | 50596                                       |
| Independent reflections           | 5527 [R(int) = 0.0457]                      |
| Completeness to theta = 67.684°   | 100.0 %                                     |
| Absorption correction             | Semi-empirical from equivalents             |
| Max. and min. transmission        | 1.00000 and 0.39191                         |
| Refinement method                 | Full-matrix least-squares on F <sup>2</sup> |
| Data / restraints / parameters    | 5527 / 0 / 333                              |
| Goodness-of-fit on F <sup>2</sup> | 1.048                                       |
| Final R indices [I>2sigma(I)]     | R1 = 0.0490, wR2 = 0.1344                   |
| R indices (all data)              | R1 = 0.0627, wR2 = 0.1451                   |
| Extinction coefficient            | n/a                                         |
| Largest diff. peak and hole       | 0.173 and -0.158 e.Å <sup>-3</sup>          |

Table 2. Atomic coordinates ( $\times 10^4$ ) and equivalent isotropic displacement parameters ( $\text{\AA}^2 \times 10^3$ ) for final-LAW\_ZXX-159-7-20210524-rt.  $U(\text{eq})$  is defined as one third of the trace of the orthogonalized  $U^{ij}$  tensor.

|       | x       | y       | z       | U(eq) |
|-------|---------|---------|---------|-------|
| O(1)  | 5246(1) | 2311(1) | 1140(1) | 62(1) |
| O(3)  | 182(1)  | 2989(1) | 1101(1) | 62(1) |
| O(4)  | -374(1) | 2637(1) | 3193(1) | 71(1) |
| O(2)  | 4645(1) | 2860(1) | 3230(1) | 70(1) |
| N(1)  | 6901(1) | 2838(1) | 3610(1) | 58(1) |
| N(2)  | 1885(1) | 2603(1) | 3575(1) | 58(1) |
| C(20) | 1079(1) | 2036(1) | 2027(1) | 49(1) |
| C(12) | 5854(1) | 2766(1) | 3145(1) | 50(1) |
| C(27) | 844(1)  | 2705(1) | 3110(1) | 50(1) |
| C(21) | 591(1)  | 2133(1) | 1381(1) | 53(1) |
| C(6)  | 5577(1) | 3203(1) | 1387(1) | 52(1) |
| C(5)  | 6022(1) | 3371(1) | 2032(1) | 50(1) |
| C(7)  | 6251(1) | 2540(1) | 2491(1) | 49(1) |
| C(24) | 1246(1) | 2911(1) | 2453(1) | 48(1) |
| C(9)  | 5699(2) | 1483(1) | 1526(1) | 53(1) |
| C(22) | 599(2)  | 3865(1) | 1446(1) | 56(1) |
| C(13) | 6756(2) | 3003(1) | 4280(1) | 57(1) |
| C(8)  | 5447(2) | 1667(1) | 2209(1) | 55(1) |
| C(23) | 393(2)  | 3737(1) | 2140(1) | 55(1) |
| C(28) | 1712(2) | 2418(1) | 4239(1) | 62(1) |
| C(19) | 1403(2) | 1118(1) | 2256(1) | 65(1) |
| C(4)  | 6270(2) | 4319(1) | 2222(1) | 68(1) |
| C(10) | 7214(2) | 1322(1) | 1474(1) | 66(1) |
| C(1)  | 5412(2) | 3960(1) | 957(1)  | 68(1) |
| C(16) | 453(2)  | 1332(1) | 984(1)  | 68(1) |
| C(25) | 2096(2) | 4063(1) | 1367(1) | 68(1) |
| C(17) | 782(2)  | 434(2)  | 1231(1) | 79(1) |
| C(2)  | 5665(2) | 4889(2) | 1165(1) | 80(1) |
| C(18) | 1258(2) | 322(1)  | 1867(1) | 80(1) |
| C(3)  | 6095(2) | 5072(2) | 1798(1) | 83(1) |
| C(11) | 4816(2) | 666(2)  | 1233(1) | 82(1) |
| C(26) | -349(2) | 4633(2) | 1127(1) | 84(1) |



|       |         |         |         |        |
|-------|---------|---------|---------|--------|
| C(15) | 7500(3) | 3895(2) | 4514(1) | 103(1) |
| C(30) | 2692(3) | 1668(2) | 4519(1) | 109(1) |
| C(14) | 7233(3) | 2144(2) | 4666(1) | 123(1) |
| C(29) | 1853(3) | 3335(2) | 4609(1) | 125(1) |

---

Table 3. Bond lengths [Å] and angles [°] for final-LAW\_ZXX-159-7-20210524-rt.

---

|             |            |
|-------------|------------|
| O(1)-C(6)   | 1.3679(19) |
| O(1)-C(9)   | 1.4471(18) |
| O(3)-C(21)  | 1.3659(19) |
| O(3)-C(22)  | 1.4505(19) |
| O(4)-C(27)  | 1.2299(16) |
| O(2)-C(12)  | 1.2261(16) |
| N(1)-H(1)   | 0.8600     |
| N(1)-C(12)  | 1.3261(18) |
| N(1)-C(13)  | 1.4631(17) |
| N(2)-H(2A)  | 0.8600     |
| N(2)-C(27)  | 1.3256(18) |
| N(2)-C(28)  | 1.4624(18) |
| C(20)-C(21) | 1.393(2)   |
| C(20)-C(24) | 1.512(2)   |
| C(20)-C(19) | 1.388(2)   |
| C(12)-C(7)  | 1.5212(18) |
| C(27)-C(24) | 1.5240(18) |
| C(21)-C(16) | 1.392(2)   |
| C(6)-C(5)   | 1.397(2)   |
| C(6)-C(1)   | 1.388(2)   |
| C(5)-C(7)   | 1.510(2)   |
| C(5)-C(4)   | 1.390(2)   |
| C(7)-H(7)   | 0.9800     |
| C(7)-C(8)   | 1.524(2)   |
| C(24)-H(24) | 0.9800     |
| C(24)-C(23) | 1.519(2)   |
| C(9)-C(8)   | 1.5229(19) |
| C(9)-C(10)  | 1.517(2)   |
| C(9)-C(11)  | 1.508(2)   |
| C(22)-C(23) | 1.522(2)   |
| C(22)-C(25) | 1.521(2)   |
| C(22)-C(26) | 1.512(2)   |
| C(13)-H(13) | 0.9800     |
| C(13)-C(15) | 1.489(3)   |
| C(13)-C(14) | 1.487(3)   |
| C(8)-H(8A)  | 0.9700     |

|              |          |
|--------------|----------|
| C(8)-H(8B)   | 0.9700   |
| C(23)-H(23A) | 0.9700   |
| C(23)-H(23B) | 0.9700   |
| C(28)-H(28)  | 0.9800   |
| C(28)-C(30)  | 1.485(3) |
| C(28)-C(29)  | 1.493(3) |
| C(19)-H(19)  | 0.9300   |
| C(19)-C(18)  | 1.376(3) |
| C(4)-H(4)    | 0.9300   |
| C(4)-C(3)    | 1.376(3) |
| C(10)-H(10A) | 0.9600   |
| C(10)-H(10B) | 0.9600   |
| C(10)-H(10C) | 0.9600   |
| C(1)-H(1A)   | 0.9300   |
| C(1)-C(2)    | 1.377(3) |
| C(16)-H(16)  | 0.9300   |
| C(16)-C(17)  | 1.377(3) |
| C(25)-H(25A) | 0.9600   |
| C(25)-H(25B) | 0.9600   |
| C(25)-H(25C) | 0.9600   |
| C(17)-H(17)  | 0.9300   |
| C(17)-C(18)  | 1.373(3) |
| C(2)-H(2)    | 0.9300   |
| C(2)-C(3)    | 1.374(3) |
| C(18)-H(18)  | 0.9300   |
| C(3)-H(3)    | 0.9300   |
| C(11)-H(11A) | 0.9600   |
| C(11)-H(11B) | 0.9600   |
| C(11)-H(11C) | 0.9600   |
| C(26)-H(26A) | 0.9600   |
| C(26)-H(26B) | 0.9600   |
| C(26)-H(26C) | 0.9600   |
| C(15)-H(15A) | 0.9600   |
| C(15)-H(15B) | 0.9600   |
| C(15)-H(15C) | 0.9600   |
| C(30)-H(30A) | 0.9600   |
| C(30)-H(30B) | 0.9600   |
| C(30)-H(30C) | 0.9600   |

|                   |            |
|-------------------|------------|
| C(14)-H(14A)      | 0.9600     |
| C(14)-H(14B)      | 0.9600     |
| C(14)-H(14C)      | 0.9600     |
| C(29)-H(29A)      | 0.9600     |
| C(29)-H(29B)      | 0.9600     |
| C(29)-H(29C)      | 0.9600     |
|                   |            |
| C(6)-O(1)-C(9)    | 117.92(11) |
| C(21)-O(3)-C(22)  | 117.88(11) |
| C(12)-N(1)-H(1)   | 117.7      |
| C(12)-N(1)-C(13)  | 124.52(11) |
| C(13)-N(1)-H(1)   | 117.7      |
| C(27)-N(2)-H(2A)  | 118.1      |
| C(27)-N(2)-C(28)  | 123.88(12) |
| C(28)-N(2)-H(2A)  | 118.1      |
| C(21)-C(20)-C(24) | 120.22(13) |
| C(19)-C(20)-C(21) | 117.71(14) |
| C(19)-C(20)-C(24) | 122.08(14) |
| O(2)-C(12)-N(1)   | 123.09(13) |
| O(2)-C(12)-C(7)   | 121.67(12) |
| N(1)-C(12)-C(7)   | 115.23(11) |
| O(4)-C(27)-N(2)   | 123.12(13) |
| O(4)-C(27)-C(24)  | 121.22(12) |
| N(2)-C(27)-C(24)  | 115.66(11) |
| O(3)-C(21)-C(20)  | 123.57(13) |
| O(3)-C(21)-C(16)  | 115.88(14) |
| C(16)-C(21)-C(20) | 120.52(16) |
| O(1)-C(6)-C(5)    | 123.51(14) |
| O(1)-C(6)-C(1)    | 115.98(14) |
| C(1)-C(6)-C(5)    | 120.48(16) |
| C(6)-C(5)-C(7)    | 120.13(14) |
| C(4)-C(5)-C(6)    | 117.50(15) |
| C(4)-C(5)-C(7)    | 122.35(14) |
| C(12)-C(7)-H(7)   | 108.0      |
| C(12)-C(7)-C(8)   | 109.91(11) |
| C(5)-C(7)-C(12)   | 113.28(12) |
| C(5)-C(7)-H(7)    | 108.0      |
| C(5)-C(7)-C(8)    | 109.50(11) |

|                     |            |
|---------------------|------------|
| C(8)-C(7)-H(7)      | 108.0      |
| C(20)-C(24)-C(27)   | 112.02(12) |
| C(20)-C(24)-H(24)   | 108.2      |
| C(20)-C(24)-C(23)   | 109.89(11) |
| C(27)-C(24)-H(24)   | 108.2      |
| C(23)-C(24)-C(27)   | 110.30(11) |
| C(23)-C(24)-H(24)   | 108.2      |
| O(1)-C(9)-C(8)      | 109.03(12) |
| O(1)-C(9)-C(10)     | 107.69(12) |
| O(1)-C(9)-C(11)     | 104.67(13) |
| C(10)-C(9)-C(8)     | 112.24(13) |
| C(11)-C(9)-C(8)     | 111.15(13) |
| C(11)-C(9)-C(10)    | 111.68(15) |
| O(3)-C(22)-C(23)    | 108.88(12) |
| O(3)-C(22)-C(25)    | 107.83(12) |
| O(3)-C(22)-C(26)    | 104.81(13) |
| C(25)-C(22)-C(23)   | 112.48(13) |
| C(26)-C(22)-C(23)   | 111.13(13) |
| C(26)-C(22)-C(25)   | 111.33(15) |
| N(1)-C(13)-H(13)    | 107.9      |
| N(1)-C(13)-C(15)    | 110.26(14) |
| N(1)-C(13)-C(14)    | 110.10(15) |
| C(15)-C(13)-H(13)   | 107.9      |
| C(14)-C(13)-H(13)   | 107.9      |
| C(14)-C(13)-C(15)   | 112.57(18) |
| C(7)-C(8)-H(8A)     | 109.3      |
| C(7)-C(8)-H(8B)     | 109.3      |
| C(9)-C(8)-C(7)      | 111.48(11) |
| C(9)-C(8)-H(8A)     | 109.3      |
| C(9)-C(8)-H(8B)     | 109.3      |
| H(8A)-C(8)-H(8B)    | 108.0      |
| C(24)-C(23)-C(22)   | 111.95(12) |
| C(24)-C(23)-H(23A)  | 109.2      |
| C(24)-C(23)-H(23B)  | 109.2      |
| C(22)-C(23)-H(23A)  | 109.2      |
| C(22)-C(23)-H(23B)  | 109.2      |
| H(23A)-C(23)-H(23B) | 107.9      |
| N(2)-C(28)-H(28)    | 107.8      |

|                     |            |
|---------------------|------------|
| N(2)-C(28)-C(30)    | 110.81(14) |
| N(2)-C(28)-C(29)    | 109.87(16) |
| C(30)-C(28)-H(28)   | 107.8      |
| C(30)-C(28)-C(29)   | 112.46(18) |
| C(29)-C(28)-H(28)   | 107.8      |
| C(20)-C(19)-H(19)   | 119.0      |
| C(18)-C(19)-C(20)   | 122.07(17) |
| C(18)-C(19)-H(19)   | 119.0      |
| C(5)-C(4)-H(4)      | 118.9      |
| C(3)-C(4)-C(5)      | 122.11(18) |
| C(3)-C(4)-H(4)      | 118.9      |
| C(9)-C(10)-H(10A)   | 109.5      |
| C(9)-C(10)-H(10B)   | 109.5      |
| C(9)-C(10)-H(10C)   | 109.5      |
| H(10A)-C(10)-H(10B) | 109.5      |
| H(10A)-C(10)-H(10C) | 109.5      |
| H(10B)-C(10)-H(10C) | 109.5      |
| C(6)-C(1)-H(1A)     | 119.9      |
| C(2)-C(1)-C(6)      | 120.26(17) |
| C(2)-C(1)-H(1A)     | 119.9      |
| C(21)-C(16)-H(16)   | 120.0      |
| C(17)-C(16)-C(21)   | 119.91(17) |
| C(17)-C(16)-H(16)   | 120.0      |
| C(22)-C(25)-H(25A)  | 109.5      |
| C(22)-C(25)-H(25B)  | 109.5      |
| C(22)-C(25)-H(25C)  | 109.5      |
| H(25A)-C(25)-H(25B) | 109.5      |
| H(25A)-C(25)-H(25C) | 109.5      |
| H(25B)-C(25)-H(25C) | 109.5      |
| C(16)-C(17)-H(17)   | 119.8      |
| C(18)-C(17)-C(16)   | 120.45(18) |
| C(18)-C(17)-H(17)   | 119.8      |
| C(1)-C(2)-H(2)      | 119.9      |
| C(3)-C(2)-C(1)      | 120.22(18) |
| C(3)-C(2)-H(2)      | 119.9      |
| C(19)-C(18)-H(18)   | 120.3      |
| C(17)-C(18)-C(19)   | 119.34(19) |
| C(17)-C(18)-H(18)   | 120.3      |

|                     |            |
|---------------------|------------|
| C(4)-C(3)-H(3)      | 120.3      |
| C(2)-C(3)-C(4)      | 119.42(19) |
| C(2)-C(3)-H(3)      | 120.3      |
| C(9)-C(11)-H(11A)   | 109.5      |
| C(9)-C(11)-H(11B)   | 109.5      |
| C(9)-C(11)-H(11C)   | 109.5      |
| H(11A)-C(11)-H(11B) | 109.5      |
| H(11A)-C(11)-H(11C) | 109.5      |
| H(11B)-C(11)-H(11C) | 109.5      |
| C(22)-C(26)-H(26A)  | 109.5      |
| C(22)-C(26)-H(26B)  | 109.5      |
| C(22)-C(26)-H(26C)  | 109.5      |
| H(26A)-C(26)-H(26B) | 109.5      |
| H(26A)-C(26)-H(26C) | 109.5      |
| H(26B)-C(26)-H(26C) | 109.5      |
| C(13)-C(15)-H(15A)  | 109.5      |
| C(13)-C(15)-H(15B)  | 109.5      |
| C(13)-C(15)-H(15C)  | 109.5      |
| H(15A)-C(15)-H(15B) | 109.5      |
| H(15A)-C(15)-H(15C) | 109.5      |
| H(15B)-C(15)-H(15C) | 109.5      |
| C(28)-C(30)-H(30A)  | 109.5      |
| C(28)-C(30)-H(30B)  | 109.5      |
| C(28)-C(30)-H(30C)  | 109.5      |
| H(30A)-C(30)-H(30B) | 109.5      |
| H(30A)-C(30)-H(30C) | 109.5      |
| H(30B)-C(30)-H(30C) | 109.5      |
| C(13)-C(14)-H(14A)  | 109.5      |
| C(13)-C(14)-H(14B)  | 109.5      |
| C(13)-C(14)-H(14C)  | 109.5      |
| H(14A)-C(14)-H(14B) | 109.5      |
| H(14A)-C(14)-H(14C) | 109.5      |
| H(14B)-C(14)-H(14C) | 109.5      |
| C(28)-C(29)-H(29A)  | 109.5      |
| C(28)-C(29)-H(29B)  | 109.5      |
| C(28)-C(29)-H(29C)  | 109.5      |
| H(29A)-C(29)-H(29B) | 109.5      |
| H(29A)-C(29)-H(29C) | 109.5      |

H(29B)-C(29)-H(29C) 109.5

---

Symmetry transformations used to generate equivalent atoms:



Table 4. Anisotropic displacement parameters ( $\text{\AA}^2 \times 10^3$ ) for final-LAW\_ZXX-159-7-20210524-rt. The anisotropic displacement factor exponent takes the form:  $-2\pi^2 [ h^2 a^{*2} U^{11} + \dots + 2 h k a^* b^* U^{12} ]$

|       | U <sup>11</sup> | U <sup>22</sup> | U <sup>33</sup> | U <sup>23</sup> | U <sup>13</sup> | U <sup>12</sup> |
|-------|-----------------|-----------------|-----------------|-----------------|-----------------|-----------------|
| O(1)  | 63(1)           | 73(1)           | 47(1)           | 1(1)            | -1(1)           | 3(1)            |
| O(3)  | 62(1)           | 77(1)           | 46(1)           | -2(1)           | 1(1)            | -5(1)           |
| O(4)  | 34(1)           | 124(1)          | 56(1)           | 2(1)            | 17(1)           | -2(1)           |
| O(2)  | 35(1)           | 122(1)          | 58(1)           | -6(1)           | 18(1)           | 2(1)            |
| N(1)  | 36(1)           | 99(1)           | 41(1)           | -4(1)           | 13(1)           | 0(1)            |
| N(2)  | 36(1)           | 98(1)           | 42(1)           | 0(1)            | 12(1)           | -3(1)           |
| C(20) | 36(1)           | 65(1)           | 50(1)           | -2(1)           | 17(1)           | -1(1)           |
| C(12) | 34(1)           | 71(1)           | 45(1)           | 0(1)            | 14(1)           | -1(1)           |
| C(27) | 35(1)           | 72(1)           | 45(1)           | -4(1)           | 13(1)           | -2(1)           |
| C(21) | 40(1)           | 68(1)           | 53(1)           | -6(1)           | 14(1)           | -5(1)           |
| C(6)  | 40(1)           | 66(1)           | 53(1)           | 5(1)            | 12(1)           | 5(1)            |
| C(5)  | 37(1)           | 66(1)           | 51(1)           | 1(1)            | 16(1)           | -1(1)           |
| C(7)  | 34(1)           | 72(1)           | 42(1)           | -1(1)           | 12(1)           | 1(1)            |
| C(24) | 33(1)           | 71(1)           | 43(1)           | -2(1)           | 12(1)           | -2(1)           |
| C(9)  | 52(1)           | 62(1)           | 46(1)           | 0(1)            | 10(1)           | -2(1)           |
| C(22) | 52(1)           | 66(1)           | 50(1)           | 1(1)            | 11(1)           | 3(1)            |
| C(13) | 47(1)           | 87(1)           | 40(1)           | 0(1)            | 15(1)           | -1(1)           |
| C(8)  | 48(1)           | 70(1)           | 49(1)           | 1(1)            | 15(1)           | -7(1)           |
| C(23) | 48(1)           | 69(1)           | 51(1)           | -4(1)           | 15(1)           | 6(1)            |
| C(28) | 48(1)           | 96(1)           | 42(1)           | 1(1)            | 13(1)           | -2(1)           |
| C(19) | 61(1)           | 72(1)           | 67(1)           | 6(1)            | 24(1)           | 8(1)            |
| C(4)  | 68(1)           | 69(1)           | 71(1)           | -10(1)          | 28(1)           | -9(1)           |
| C(10) | 60(1)           | 84(1)           | 58(1)           | -1(1)           | 17(1)           | 14(1)           |
| C(1)  | 59(1)           | 85(1)           | 63(1)           | 19(1)           | 15(1)           | 13(1)           |
| C(16) | 56(1)           | 91(1)           | 61(1)           | -22(1)          | 18(1)           | -12(1)          |
| C(25) | 62(1)           | 82(1)           | 64(1)           | 2(1)            | 21(1)           | -12(1)          |
| C(17) | 68(1)           | 73(1)           | 102(2)          | -28(1)          | 34(1)           | -11(1)          |
| C(2)  | 72(1)           | 75(1)           | 99(2)           | 28(1)           | 34(1)           | 14(1)           |
| C(18) | 78(1)           | 65(1)           | 104(2)          | -2(1)           | 38(1)           | 4(1)            |
| C(3)  | 85(1)           | 63(1)           | 110(2)          | 2(1)            | 44(1)           | -2(1)           |
| C(11) | 87(1)           | 88(1)           | 72(1)           | -17(1)          | 17(1)           | -26(1)          |
| C(26) | 85(1)           | 94(2)           | 75(1)           | 17(1)           | 13(1)           | 22(1)           |

|       |        |        |       |        |       |        |
|-------|--------|--------|-------|--------|-------|--------|
| C(15) | 125(2) | 122(2) | 68(1) | -22(1) | 33(1) | -39(2) |
| C(30) | 120(2) | 129(2) | 82(1) | 36(1)  | 32(1) | 41(2)  |
| C(14) | 207(3) | 105(2) | 65(1) | 23(1)  | 48(2) | 35(2)  |
| C(29) | 208(3) | 112(2) | 60(1) | -13(1) | 32(2) | 13(2)  |

---

Table 5. Hydrogen coordinates ( $\times 10^4$ ) and isotropic displacement parameters ( $\text{\AA}^2 \times 10^{-3}$ ) for final-LAW\_ZXX-159-7-20210524-rt.

|        | x     | y    | z    | U(eq) |
|--------|-------|------|------|-------|
| H(1)   | 7723  | 2785 | 3511 | 69    |
| H(2A)  | 2711  | 2647 | 3481 | 69    |
| H(7)   | 7235  | 2378 | 2545 | 58    |
| H(24)  | 2219  | 3102 | 2506 | 58    |
| H(13)  | 5773  | 3095 | 4310 | 68    |
| H(8A)  | 5723  | 1106 | 2467 | 66    |
| H(8B)  | 4469  | 1771 | 2218 | 66    |
| H(23A) | 651   | 4326 | 2371 | 66    |
| H(23B) | -576  | 3618 | 2164 | 66    |
| H(28)  | 773   | 2175 | 4247 | 74    |
| H(19)  | 1728  | 1038 | 2685 | 78    |
| H(4)   | 6563  | 4448 | 2649 | 81    |
| H(10A) | 7316  | 1150 | 1044 | 100   |
| H(10B) | 7564  | 813  | 1756 | 100   |
| H(10C) | 7720  | 1901 | 1589 | 100   |
| H(1A)  | 5129  | 3840 | 528  | 82    |
| H(16)  | 138   | 1404 | 552  | 82    |
| H(25A) | 2654  | 3520 | 1517 | 102   |
| H(25B) | 2412  | 4622 | 1609 | 102   |
| H(25C) | 2168  | 4170 | 925  | 102   |
| H(17)  | 682   | -101 | 966  | 95    |
| H(2)   | 5545  | 5395 | 875  | 96    |
| H(18)  | 1479  | -286 | 2033 | 96    |
| H(3)   | 6265  | 5699 | 1938 | 100   |
| H(11A) | 3864  | 799  | 1264 | 123   |
| H(11B) | 5086  | 81   | 1455 | 123   |
| H(11C) | 4937  | 600  | 793  | 123   |
| H(26A) | -273  | 4650 | 680  | 127   |
| H(26B) | -91   | 5246 | 1314 | 127   |
| H(26C) | -1284 | 4490 | 1185 | 127   |
| H(15A) | 8470  | 3817 | 4497 | 155   |
| H(15B) | 7349  | 4017 | 4945 | 155   |

|        |      |      |      |     |
|--------|------|------|------|-----|
| H(15C) | 7159 | 4427 | 4250 | 155 |
| H(30A) | 2501 | 1075 | 4294 | 163 |
| H(30B) | 2590 | 1578 | 4960 | 163 |
| H(30C) | 3620 | 1867 | 4486 | 163 |
| H(14A) | 6677 | 1599 | 4518 | 184 |
| H(14B) | 7150 | 2263 | 5105 | 184 |
| H(14C) | 8181 | 2015 | 4623 | 184 |
| H(29A) | 2795 | 3546 | 4654 | 188 |
| H(29B) | 1583 | 3231 | 5022 | 188 |
| H(29C) | 1270 | 3816 | 4387 | 188 |

---

Table 6. Torsion angles [°] for final-LAW\_ZXX-159-7-20210524-rt.

---

both electronic and steric effects played key roles in controlling the regioselectivity of the annulation reaction. As shown in following Figure 2a, when R group is -OMe (electron-rich), the key radical intermediate **a** resulting from *ortho*-annulation is more stable than intermediate **b** resulting from *para*-annulation, meanwhile, radical **a** is easier to be oxidized. Therefore, *ortho*-position annulation product was formed primarily in this case. However, when R group is -Me, the steric hindrance might be the main factor to control the regioselectivity, as *para*-position where is less hindrance, was attacked easily leading to the primary *para*-selectivity. When R group is -CF<sub>3</sub>, both electronic and steric effects contributed to the excellent *para*-position, since the key radical **d** is more electron-rich as well as less hindrance.

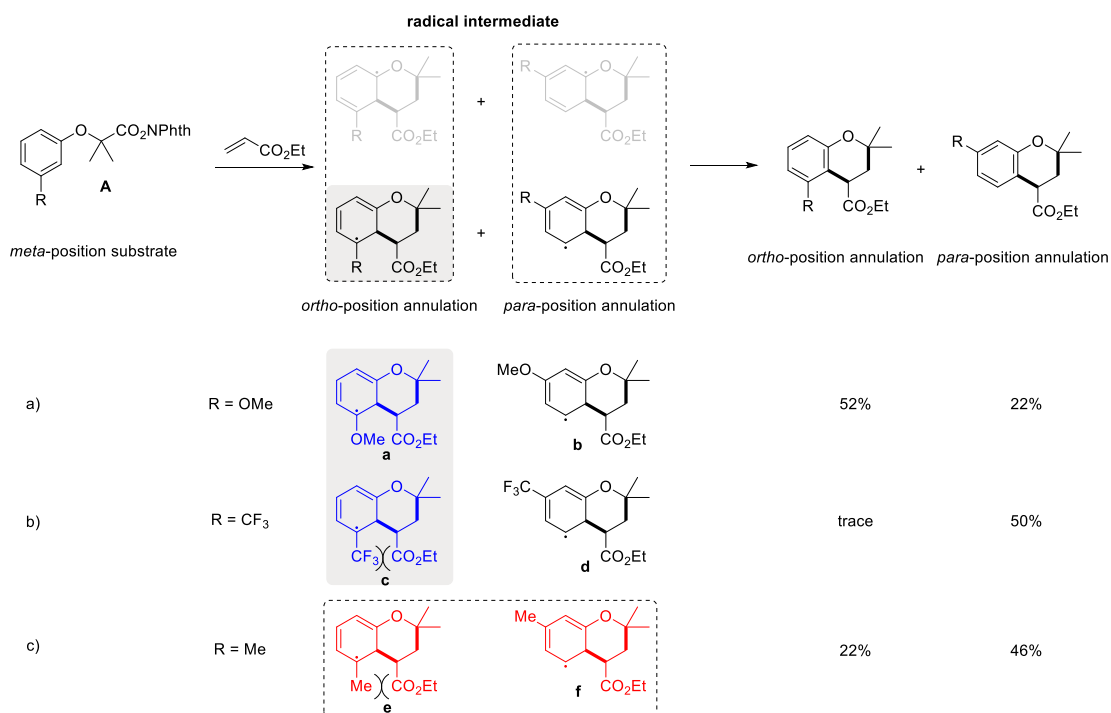

## Characterization of Products

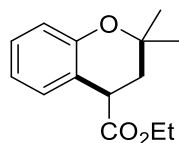

**Ethyl-2,2-dimethylchromane-4-carboxylate (1).** Colorless liquid was obtained in 70% isolated yield.  $^1\text{H NMR}$  (400 MHz,  $\text{CDCl}_3$ )  $\delta$  7.15 (t,  $J = 7.7$  Hz, 2H), 6.86 (m, 1H), 6.80 (dd,  $J = 7.8, 1.5$  Hz, 1H), 4.23 (m, 2H), 3.85 (dd,  $J = 10.6, 6.4$  Hz, 1H), 2.23 (dd,  $J = 13.6, 10.6$  Hz, 1H), 2.03 (dd,  $J = 13.6, 6.4$  Hz, 1H), 1.41 (s, 3H), 1.35–1.19 (m, 6H).  $^{13}\text{C NMR}$  (101 MHz,  $\text{CDCl}_3$ )  $\delta$  173.86, 153.54, 128.85, 128.69, 120.16, 117.99, 117.91, 73.73, 61.24, 39.85, 36.31, 28.89, 25.05, 14.36. **HRMS (ESI)** calcd for  $\text{C}_{14}\text{H}_{19}\text{O}_3^+$ ,  $[\text{M}+\text{H}]^+$ , 235.1329, found 235.1326.

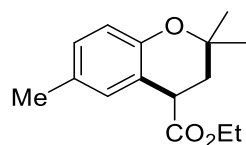

**Ethyl-2,2,6-trimethylchromane-4-carboxylate (2).** Faint yellow liquid was obtained in 65% isolated yield.  $^1\text{H NMR}$  (400 MHz,  $\text{CDCl}_3$ )  $\delta$  7.02–6.97 (m, 2H), 6.74 (d,  $J = 8.9$  Hz, 1H), 4.28 (m, 2H), 3.85 (dd,  $J = 10.7, 6.4$  Hz, 1H), 2.36–2.15 (m, 4H), 2.05 (dd,  $J = 13.5, 6.4$  Hz, 1H), 1.44 (s, 3H), 1.34 (t,  $J = 7.1$  Hz, 3H), 1.29 (s, 3H).  $^{13}\text{C NMR}$  (101 MHz,  $\text{CDCl}_3$ )  $\delta$  174.01, 151.28, 129.46, 129.29, 129.00, 117.64, 117.59, 73.53, 61.19, 39.90, 36.44, 28.91, 24.90, 20.71, 14.36. **HRMS (ESI)** calcd for  $\text{C}_{15}\text{H}_{21}\text{O}_3^+$ ,  $[\text{M}+\text{H}]^+$ , 249.1485, found 249.1484.

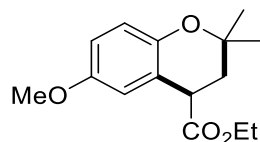

**Ethyl-6-methoxy-2,2-dimethylchromane-4-carboxylate (3).** Faint yellow liquid was obtained in 73% isolated yield.  $^1\text{H NMR}$  (400 MHz,  $\text{CDCl}_3$ )  $\delta$  6.78–6.69 (m, 3H), 4.24 (m, 2H), 3.82 (m, 1H), 3.74 (s, 3H), 2.21 (dd,  $J = 13.6, 10.6$  Hz, 1H), 2.01 (dd,  $J = 13.6, 6.5$  Hz, 1H), 1.40 (s, 3H), 1.31 (t,  $J = 7.1$  Hz, 3H), 1.25 (s, 3H).  $^{13}\text{C NMR}$  (101 MHz,  $\text{CDCl}_3$ )  $\delta$  173.59, 153.04, 147.44, 118.39, 118.24, 114.96, 113.09, 73.35, 61.17, 55.71, 40.01, 36.16, 28.80, 24.66, 14.29. **HRMS (ESI)** calcd for  $\text{C}_{15}\text{H}_{21}\text{O}_4^+$ ,  $[\text{M}+\text{H}]^+$ , 265.1434, found 265.1433.

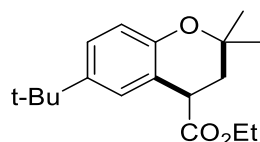

**Ethyl-6-(tert-butyl)-2,2-dimethylchromane-4-carboxylate (4).** Yellow liquid was obtained in 68% isolated yield.  $^1\text{H NMR}$  (400 MHz,  $\text{CDCl}_3$ )  $\delta$  7.20–7.14 (m, 2H), 6.77–6.70 (m, 1H), 4.24 (m, 2H), 3.84 (dd,  $J = 10.6, 6.3$  Hz, 1H), 2.23 (dd,  $J = 13.5, 10.5$  Hz, 1H), 2.01 (dd,  $J = 13.5, 6.4$  Hz, 1H), 1.39 (s, 3H), 1.35–1.12 (m, 12H).  $^{13}\text{C NMR}$  (101 MHz,  $\text{CDCl}_3$ )  $\delta$  173.93, 151.16, 142.63, 125.77, 125.44, 117.21,

116.99, 73.54, 61.12, 40.07, 36.37, 34.18, 31.64, 28.93, 25.12, 14.45. **HRMS (ESI)** calcd for  $C_{18}H_{27}O_3^+$ ,  $[M+H]^+$ , 291.1955, found 291.1952.

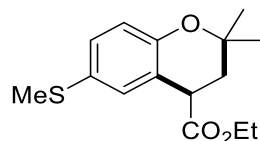

**Ethyl-2,2-dimethyl-6-(methylthio)chromane-4-carboxylate (5).** Faint yellow liquid was obtained in 45% isolated yield.  $^1H$  NMR (400 MHz,  $CDCl_3$ )  $\delta$  7.23–7.11 (m, 2H), 6.75 (d,  $J = 8.5$  Hz, 1H), 4.25 (m, 2H), 3.81 (dd,  $J = 10.5, 6.4$  Hz, 1H), 2.42 (s, 3H), 2.22 (dd,  $J = 13.6, 10.5$  Hz, 1H), 2.02 (dd,  $J = 13.6, 6.4$  Hz, 1H), 1.40 (s, 3H), 1.31 (t,  $J = 7.1$  Hz, 3H), 1.26 (s, 3H).  $^{13}C$  NMR (101 MHz,  $CDCl_3$ )  $\delta$  173.48, 152.25, 129.70, 129.58, 128.07, 118.65, 118.63, 73.98, 61.36, 39.72, 36.14, 28.76, 25.05, 18.27, 14.38. **HRMS (ESI)** calcd for  $C_{15}H_{21}O_3S^+$ ,  $[M+H]^+$ , 281.1206, found 281.1200.

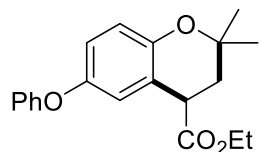

**Ethyl (R)-2,2-dimethyl-6-phenoxychromane-4-carboxylate (6).** Faint yellow liquid was obtained in 52% isolated yield.  $^1H$  NMR (400 MHz,  $CDCl_3$ )  $\delta$  7.32–7.23 (m, 2H), 7.04 (d,  $J = 7.4$  Hz, 1H), 6.98–6.91 (m, 2H), 6.91–6.83 (m, 2H), 6.78 (d,  $J = 8.7$  Hz, 1H), 4.18 (q,  $J = 7.1$  Hz, 2H), 3.81 (dd,  $J = 10.5, 6.5$  Hz, 1H), 2.23 (m, 1H), 2.04 (m, 1H), 1.41 (s, 3H), 1.28 (s, 3H), 1.22 (t,  $J = 7.1$  Hz, 3H).  $^{13}C$  NMR (101 MHz,  $CDCl_3$ )  $\delta$  173.43, 158.50, 149.77, 149.49, 129.68, 122.51, 120.51, 119.84, 118.82, 117.77, 73.82, 61.35, 39.91, 36.06, 28.78, 25.01, 14.27. **HRMS (ESI)** calcd for  $C_{20}H_{23}O_4^+$ ,  $[M+H]^+$ , 327.1596, found 327.1585.

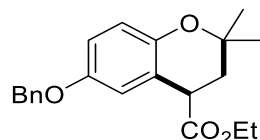

**Ethyl-6-(benzyloxy)-2,2-dimethylchromane-4-carboxylate (7).** Faint yellow liquid was obtained in 44% isolated yield.  $^1H$  NMR (400 MHz,  $CDCl_3$ )  $\delta$  7.46–7.34 (m, 4H), 7.33–7.27 (m, 1H), 6.85–6.77 (m, 2H), 6.73 (d,  $J = 8.6$  Hz, 1H), 4.97 (s, 2H), 4.20 (m, 2H), 3.81 (dd,  $J = 10.7, 6.4$  Hz, 1H), 2.21 (dd,  $J = 13.6, 10.6$  Hz, 1H), 2.00 (dd,  $J = 13.6, 6.5$  Hz, 1H), 1.39 (s, 3H), 1.27 (t,  $J = 7.1$  Hz, 2H), 1.25 (s, 4H).  $^{13}C$  NMR (101 MHz,  $CDCl_3$ )  $\delta$  173.67, 152.40, 147.77, 137.42, 128.64, 127.97, 127.60, 118.49, 118.38, 116.09, 114.44, 73.49, 70.77, 61.28, 40.13, 36.26, 28.90, 24.80, 14.37. **HRMS (ESI)** calcd for  $C_{21}H_{25}O_4^+$ ,  $[M+H]^+$ , 341.1747, found 341.1748.

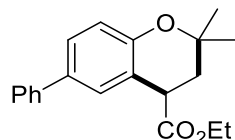

**Ethyl-2,2-dimethyl-6-phenylchromane-4-carboxylate (8).** Colorless liquid was obtained in 56% isolated yield.  $^1H$  NMR (400 MHz,  $CDCl_3$ )  $\delta$  7.56–7.48 (m, 2H), 7.39 (m, 4H), 7.29 (d,  $J = 7.2$  Hz, 1H), 6.91–6.84 (m, 1H), 4.34–4.18 (m, 2H), 3.91 (dd,  $J = 10.5, 6.4$  Hz, 1H), 2.27 (dd,  $J = 13.6, 10.5$  Hz, 1H), 2.07 (dd,  $J = 13.8, 6.6$  Hz, 1H), 1.43 (s, 3H), 1.36–1.28 (m, 6H).  $^{13}C$  NMR (101 MHz,  $CDCl_3$ )  $\delta$  173.74, 153.21, 141.04, 133.30, 128.79, 127.59, 127.56, 126.83, 126.69, 118.28, 118.14, 61.33, 39.95, 36.33, 28.86, 25.15, 14.42. **HRMS (ESI)** calcd for  $C_{20}H_{23}O_3^+$ ,  $[M+H]^+$ , 311.1642, found 311.1637.

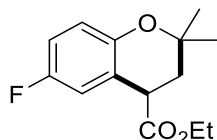

**Ethyl-6-fluoro-2,2-dimethylchromane-4-carboxylate (9).** Faint yellow liquid was obtained in 55% isolated yield.  $^1\text{H NMR}$  (400 MHz,  $\text{CDCl}_3$ )  $\delta$  6.94–6.82 (m, 2H), 6.74 (m, 1H), 4.25 (m, 2H), 3.87–3.72 (m, 1H), 2.21 (dd,  $J = 13.6, 10.5$  Hz, 1H), 2.10–1.96 (m, 1H), 1.39 (s, 3H), 1.31 (t,  $J = 7.1$  Hz, 3H), 1.26 (s, 3H).  $^{13}\text{C NMR}$  (101 MHz,  $\text{CDCl}_3$ )  $\delta$  173.25,  $\delta$  156.58 (d,  $J = 237.6$  Hz), 149.63 (d,  $J = 2.1$  Hz), 118.85, 118.78 (d,  $J = 8.0$  Hz), 115.67 (d,  $J = 23.0$  Hz), 114.85 (d,  $J = 23.6$  Hz), 73.88, 61.47, 39.87, 35.94, 28.72, 24.91, 14.34.  $^{19}\text{F NMR}$  (377 MHz,  $\text{CDCl}_3$ )  $\delta$  -124.18. **HRMS (ESI)** calcd for  $\text{C}_{14}\text{H}_{18}\text{FO}_3^+$ ,  $[\text{M}+\text{H}]^+$ , 253.1234, found 253.1233.

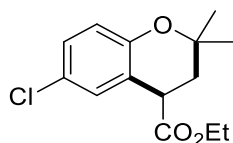

**Ethyl-6-chloro-2,2-dimethylchromane-4-carboxylate (10).** Faint yellow liquid was obtained in 64% isolated yield.  $^1\text{H NMR}$  (400 MHz,  $\text{CDCl}_3$ )  $\delta$  7.17 (dd,  $J = 2.7, 1.1$  Hz, 1H), 7.10 (m, 1H), 6.74 (d,  $J = 8.7$  Hz, 1H), 4.25 (m, 2H), 3.80 (m, 1H), 2.21 (dd,  $J = 13.7, 10.4$  Hz, 1H), 2.02 (dd,  $J = 13.7, 6.5$  Hz, 1H), 1.39 (s, 3H), 1.31 (t,  $J = 7.1$  Hz, 3H), 1.26 (s, 3H).  $^{13}\text{C NMR}$  (101 MHz,  $\text{CDCl}_3$ )  $\delta$  173.18, 152.25, 128.75, 128.62, 124.82, 119.40, 119.26, 74.17, 61.51, 39.61, 35.90, 28.64, 25.01, 14.33. **HRMS (ESI)** calcd for  $\text{C}_{14}\text{H}_{18}\text{ClO}_3^+$ ,  $[\text{M}+\text{H}]^+$ , 269.0939, found 269.0938.

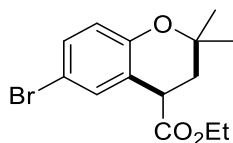

**Ethyl-6-bromo-2,2-dimethylchromane-4-carboxylate (11).** Yellow liquid was obtained in 56% isolated yield.  $^1\text{H NMR}$  (400 MHz,  $\text{CDCl}_3$ )  $\delta$  7.31 (dd,  $J = 2.4, 1.1$  Hz, 1H), 7.28–7.19 (m, 1H), 6.69 (d,  $J = 8.7$  Hz, 1H), 4.25 (m, 2H), 3.80 (dd,  $J = 10.4, 6.5$  Hz, 1H), 2.21 (dd,  $J = 13.7, 10.4$  Hz, 1H), 2.02 (dd,  $J = 13.7, 6.5$  Hz, 1H), 1.39 (s, 3H), 1.31 (t,  $J = 7.1$  Hz, 3H), 1.26 (s, 4H).  $^{13}\text{C NMR}$  (101 MHz,  $\text{CDCl}_3$ )  $\delta$  173.15, 152.79, 131.62, 131.59, 120.01, 119.75, 112.11, 74.20, 61.52, 39.56, 35.91, 28.63, 25.06, 14.34. **HRMS (ESI)** calcd for  $\text{C}_{14}\text{H}_{18}\text{BrO}_3^+$ ,  $[\text{M}+\text{H}]^+$ , 313.0434, found 313.0428.

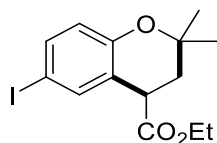

**Ethyl-6-iodo-2,2-dimethylchromane-4-carboxylate (12).** Dark yellow liquid was obtained in 58% isolated yield.  $^1\text{H NMR}$  (400 MHz,  $\text{CDCl}_3$ )  $\delta$  7.48 (dd,  $J = 2.2, 1.0$  Hz, 1H), 7.41 (m, 1H), 6.57 (d,  $J = 8.6$  Hz, 1H), 4.25 (m, 2H), 3.79 (dd,  $J = 10.3, 6.5$  Hz, 1H), 2.20 (dd,  $J = 13.7, 10.3$  Hz, 1H), 2.01 (dd,  $J = 13.7, 6.4$  Hz, 1H), 1.39 (s, 3H), 1.31 (t,  $J = 7.1$  Hz, 3H), 1.26 (s, 3H).  $^{13}\text{C NMR}$  (101 MHz,  $\text{CDCl}_3$ )  $\delta$  173.16, 153.58, 137.59, 137.46, 120.66, 120.28, 81.96, 74.19, 61.49, 39.38, 35.89, 28.61, 25.09, 14.35. **HRMS (ESI)** calcd for  $\text{C}_{14}\text{H}_{18}\text{IO}_3^+$ ,  $[\text{M}+\text{H}]^+$ , 361.0295, found 361.0290.



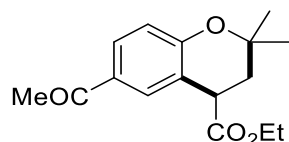

**Ethyl-6-acetyl-2,2-dimethylchromane-4-carboxylate (13).** Faint yellow liquid was obtained in 54% isolated yield.  $^1\text{H NMR}$  (400 MHz,  $\text{CDCl}_3$ )  $\delta$  7.92–7.84 (m, 1H), 7.79 (dd,  $J = 8.7, 2.3$  Hz, 1H), 6.84 (d,  $J = 8.6$  Hz, 1H), 4.27 (m, 2H), 3.87 (dd,  $J = 10.2, 6.4$  Hz, 1H), 2.53 (s, 2H), 2.26 (dd,  $J = 13.8, 10.2$  Hz, 1H), 2.09 (dd,  $J = 13.7, 6.4$  Hz, 1H), 1.42 (s, 3H), 1.36–1.26 (m, 6H).  $^{13}\text{C NMR}$  (101 MHz,  $\text{CDCl}_3$ )  $\delta$  196.84, 173.23, 158.02, 130.51, 129.84, 129.40, 117.99, 117.83, 75.08, 61.52, 39.48, 35.97, 28.54, 26.40, 25.39, 14.36. **HRMS (ESI)** calcd for  $\text{C}_{16}\text{H}_{21}\text{O}_4^+$ ,  $[\text{M}+\text{H}]^+$ , 277.1434, found 277.1437.

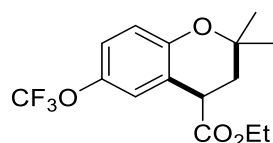

**Ethyl-2,2-dimethyl-6-(trifluoromethoxy)chromane-4-carboxylate (14).** Faint yellow liquid was obtained in 60% isolated yield.  $^1\text{H NMR}$  (400 MHz,  $\text{CDCl}_3$ )  $\delta$  7.09 (d,  $J = 2.9$  Hz, 1H), 7.02 (dd,  $J = 9.0, 2.9$  Hz, 1H), 6.79 (d,  $J = 8.9$  Hz, 1H), 4.25 (q,  $J = 7.1$  Hz, 2H), 3.82 (dd,  $J = 10.2, 6.5$  Hz, 1H), 2.23 (dd,  $J = 13.7, 10.2$  Hz, 1H), 2.04 (dd,  $J = 13.7, 6.5$  Hz, 1H), 1.40 (s, 3H), 1.29 (q,  $J = 9.1, 8.1$  Hz, 6H).  $^{13}\text{C NMR}$  (101 MHz,  $\text{CDCl}_3$ )  $\delta$  172.98, 152.23, 142.06, 142.04, 121.93, 120.72 (q,  $J = 256.54$  Hz) 118.78, 77.48, 77.16, 76.84, 74.29, 61.55, 39.67, 35.76, 28.55, 25.16, 14.23.  $^{19}\text{F NMR}$  (377 MHz,  $\text{CDCl}_3$ )  $\delta$  -58.38. **HRMS (ESI)** calcd for  $\text{C}_{15}\text{H}_{18}\text{F}_3\text{O}_4^+$ ,  $[\text{M}+\text{H}]^+$ , 319.1152, found 319.1155.

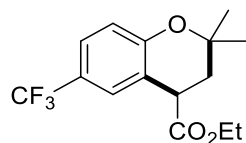

**Ethyl-2,2-dimethyl-6-(trifluoromethyl)chromane-4-carboxylate (15).** White solid was obtained in 53% isolated yield.  $^1\text{H NMR}$  (400 MHz,  $\text{CDCl}_3$ )  $\delta$  7.48 (d,  $J = 2.2$  Hz, 1H), 7.39 (dd,  $J = 8.7, 2.3$  Hz, 1H), 6.87 (d,  $J = 8.6$  Hz, 1H), 4.26 (m, 2H), 3.85 (dd,  $J = 10.2, 6.4$  Hz, 1H), 2.26 (dd,  $J = 13.8, 10.2$  Hz, 1H), 2.07 (dd,  $J = 13.8, 6.5$  Hz, 1H), 1.42 (s, 3H), 1.36–1.23 (m, 6H).  $^{13}\text{C NMR}$  (101 MHz,  $\text{CDCl}_3$ )  $\delta$  172.99, 156.37, 126.73, 126.69, 126.66, 125.82, 125.78,  $\delta$  122.17 (q,  $J = 32.7$  Hz). 118.35, 118.17, 77.48, 74.81, 61.60, 39.47, 35.84, 28.55, 25.32, 14.29.  $^{19}\text{F NMR}$  (377 MHz,  $\text{CDCl}_3$ )  $\delta$  -61.50. **HRMS (ESI)** calcd for  $\text{C}_{15}\text{H}_{18}\text{F}_3\text{O}_3\text{Na}^+$ ,  $[\text{M}+\text{Na}]^+$ , 325.1022, found 325.1020.

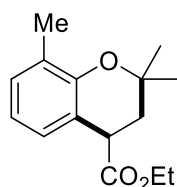

**Ethyl-2,2,8-trimethylchromane-4-carboxylate (16).** Faint yellow liquid was obtained in 45% isolated yield.  $^1\text{H NMR}$  (400 MHz,  $\text{CDCl}_3$ )  $\delta$  7.00 (dd,  $J = 11.6, 7.5$  Hz, 2H), 6.76 (t,  $J = 7.5$  Hz, 1H), 4.23 (m, 2H), 3.85 (dd,  $J = 10.8, 6.4$  Hz, 1H), 2.32–2.09 (m, 4H), 2.02 (dd,  $J = 13.4, 6.4$  Hz, 1H), 1.42 (s, 3H), 1.35–1.20 (m, 6H).  $^{13}\text{C NMR}$  (101 MHz,  $\text{CDCl}_3$ )  $\delta$  174.18, 151.70, 129.68, 126.91, 126.19, 119.37, 117.35, 77.48, 73.49, 61.17, 40.14, 36.38, 29.12, 25.20, 16.31, 14.36. **HRMS (ESI)** calcd for  $\text{C}_{15}\text{H}_{21}\text{O}_3^+$ ,  $[\text{M}+\text{H}]^+$ , 249.1485, found 249.1481.

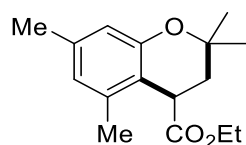

**Ethyl-2,2,5,7-tetramethylchromane-4-carboxylate (17).** Faint yellow liquid was obtained in 51% isolated yield.  $^1\text{H NMR}$  (400 MHz,  $\text{CDCl}_3$ )  $\delta$  6.58 (d,  $J = 1.7$  Hz, 1H), 6.52 (d,  $J = 1.7$  Hz, 1H), 4.19 (q,  $J = 7.1$  Hz, 2H), 3.73 (t,  $J = 7.2$  Hz, 1H), 2.28–2.18 (m, 4H), 2.17–2.05 (m, 4H), 1.32 (s, 3H), 1.28 (s, 3H), 1.25 (t,  $J = 7.1$  Hz, 3H).  $^{13}\text{C NMR}$  (101 MHz,  $\text{CDCl}_3$ )  $\delta$  174.58, 153.76, 138.22, 138.02, 123.42, 116.07, 114.25, 73.12, 61.13, 38.73, 37.66, 27.22, 26.47, 21.15, 19.50, 14.26. **HRMS (ESI)** calcd for  $\text{C}_{16}\text{H}_{23}\text{O}_3^+$ ,  $[\text{M}+\text{H}]^+$ , 263.1642, found 263.1640.

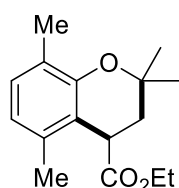

**Ethyl-2,2,5,8-tetramethylchromane-4-carboxylate (18).** Faint yellow liquid was obtained in 76% isolated yield.  $^1\text{H NMR}$  (400 MHz,  $\text{CDCl}_3$ )  $\delta$  6.94 (d,  $J = 7.5$  Hz, 1H), 6.64 (d,  $J = 7.5$  Hz, 1H), 4.18 (q,  $J = 7.1$  Hz, 2H), 3.77 (t,  $J = 7.4$  Hz, 1H), 2.34–2.00 (m, 8H), 1.34 (s, 3H), 1.30–1.21 (m, 6H).  $^{13}\text{C NMR}$  (101 MHz,  $\text{CDCl}_3$ )  $\delta$  174.67, 152.02, 135.45, 129.31, 124.34, 121.31, 116.68, 72.93, 61.10, 39.20, 37.59, 27.51, 26.51, 19.39, 16.22, 14.24. **HRMS (ESI)** calcd for  $\text{C}_{16}\text{H}_{23}\text{O}_3^+$ ,  $[\text{M}+\text{H}]^+$ , 263.1642, found 263.1639.

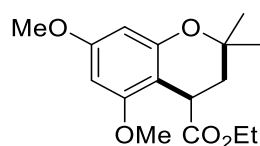

**Ethyl-5,7-dimethoxy-2,2-dimethylchromane-4-carboxylate (19).** Faint yellow liquid was obtained in 66% isolated yield.  $^1\text{H NMR}$  (400 MHz,  $\text{CDCl}_3$ )  $\delta$  6.08–5.99 (m, 2H), 4.16 (m, 2H), 3.74 (d,  $J = 8.0$  Hz, 6H), 3.65 (dd,  $J = 10.1, 7.0$  Hz, 1H), 2.07 (dd,  $J = 13.4, 7.0$  Hz, 1H), 1.99 (dd,  $J = 13.4, 10.2$  Hz, 1H), 1.39 (s, 3H), 1.31–1.18 (m, 6H).  $^{13}\text{C NMR}$  (101 MHz,  $\text{CDCl}_3$ )  $\delta$  175.30, 160.53, 158.77, 155.02, 100.86, 94.04, 91.63, 74.11, 60.64, 55.50, 55.36, 37.01, 36.58, 28.64, 24.54, 14.39. **HRMS (ESI)** calcd for  $\text{C}_{16}\text{H}_{23}\text{O}_5^+$ ,  $[\text{M}+\text{H}]^+$ , 295.1540, found 295.1545.

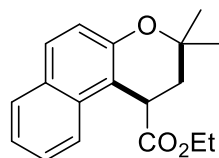

**Ethyl-3,3-dimethyl-2,3-dihydro-1H-benzo[f]chromene-1-carboxylate (20).** Colorless liquid was obtained in 68% isolated yield.  $^1\text{H NMR}$  (400 MHz,  $\text{CDCl}_3$ )  $\delta$  7.80–7.72 (m, 1H), 7.68 (d,  $J = 9.0$  Hz, 1H), 7.58 (d,  $J = 8.5$  Hz, 1H), 7.43 (m, 1H), 7.37–7.27 (m, 1H), 7.04 (d,  $J = 8.9$  Hz, 1H), 4.24–4.12 (m, 3H), 2.43–2.18 (m, 2H), 1.42 (s, 3H), 1.34 (s, 3H), 1.17 (t,  $J = 7.1$  Hz, 3H).  $^{13}\text{C NMR}$  (101 MHz,  $\text{CDCl}_3$ )  $\delta$  174.91, 151.86, 133.16, 129.55, 129.15, 128.72, 126.57, 126.54, 123.18, 122.35, 119.93, 110.14, 73.84, 61.24, 38.28, 37.48, 27.46, 25.85, 14.19. **HRMS (ESI)** calcd for  $\text{C}_{15}\text{H}_{21}\text{O}_3^+$ ,  $[\text{M}+\text{H}]^+$ , 285.1485, found 285.1484.

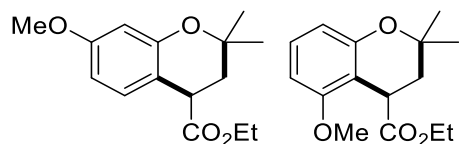

**Ethyl-7-methoxy-2,2-dimethylchromane-4-carboxylate and Ethyl-5-methoxy-2,2-dimethylchromane-4-carboxylate (21).** Colorless liquid was obtained in 74% isolated yield.  $^1\text{H NMR}$  (400 MHz,  $\text{CDCl}_3$ )  $\delta$  7.06 (d,  $J = 8.6$  Hz, 1H), 6.47 (dd,  $J = 8.6, 2.7$  Hz, 1H), 6.36 (d,  $J = 2.7$  Hz, 1H), 4.23 (m, 2H), 3.75 (s, 4H), 2.20 (dd,  $J = 13.6, 10.4$  Hz, 1H), 2.01 (dd,  $J = 13.5, 6.4$  Hz, 1H), 1.40 (s, 3H), 1.34–1.22 (m, 6H).  $^{13}\text{C NMR}$  (101 MHz,  $\text{CDCl}_3$ )  $\delta$  174.09, 160.05, 154.48, 129.55, 110.20, 107.65, 102.08, 74.01, 61.20, 55.35, 39.26, 36.38, 28.82, 25.03, 14.38.

$^1\text{H NMR}$  (400 MHz,  $\text{CDCl}_3$ )  $\delta$  7.12 (t,  $J = 8.2$  Hz, 1H), 6.47 (d,  $J = 8.3$  Hz, 1H), 6.41 (d,  $J = 8.1$  Hz, 1H), 4.17 (m, 2H), 3.80–3.66 (m, 4H), 2.19–1.92 (m, 2H), 1.40 (s, 3H), 1.32–1.13 (m, 6H).  $^{13}\text{C NMR}$  (101 MHz,  $\text{CDCl}_3$ )  $\delta$  175.08, 158.07, 154.54, 128.63, 110.63, 108.25, 102.13, 73.72, 60.68, 55.56, 36.98, 36.94, 28.68, 24.54, 14.39. **HRMS (ESI)** calcd for  $\text{C}_{15}\text{H}_{21}\text{O}_4^+$ ,  $[\text{M}+\text{H}]^+$ , 265.1434, found 265.1432.

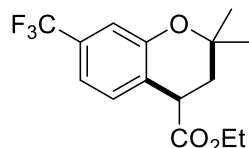

**Ethyl-2,2-dimethyl-7-(trifluoromethyl)chromane-4-carboxylate (22).** Colorless liquid was obtained in 50% isolated yield.  $^1\text{H NMR}$  (400 MHz,  $\text{CDCl}_3$ )  $\delta$  7.32 (d,  $J = 8.0$  Hz, 1H), 7.16 – 7.09 (m, 2H), 4.33 – 4.23 (m, 2H), 3.89 (m, 1H), 2.28 (m, 1H), 2.11 (m, 1H), 1.44 (s, 3H), 1.38 – 1.29 (m, 6H).  $^{13}\text{C NMR}$  (101 MHz,  $\text{CDCl}_3$ )  $\delta$  173.13, 153.79, 130.98 (q,  $J = 32.5$  Hz), 129.78, 123.97 (d,  $J = 272.2$  Hz), 121.70, 115.17 (q,  $J = 4.0$  Hz), 74.56, 61.55, 39.68, 35.92, 28.54, 25.18, 14.30.  $^{19}\text{F NMR}$  (377 MHz,  $\text{CDCl}_3$ )  $\delta$  -62.85. **HRMS (ESI)** calcd for  $\text{C}_{15}\text{H}_{18}\text{F}_3\text{O}_3^+$ ,  $[\text{M}+\text{H}]^+$ , 302.1203, found 302.1201.

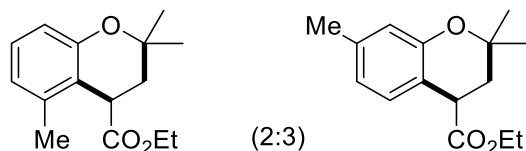

**Ethyl-2,2,5-trimethylchromane-4-carboxylate and Ethyl-2,2,7-trimethylchromane-4-carboxylate (23).** Colorless liquid was obtained in 68% isolated yield.  $^1\text{H NMR}$  (400 MHz,  $\text{CDCl}_3$ )  $\delta$  7.12 – 6.97 (m, 1H), 6.78 – 6.59 (m, 2H), 4.29 – 4.10 (m, 2H), 3.87 – 3.68 (m, 1H), 2.32 – 1.96 (m, 5H), 1.44 – 1.20 (m, 9H).  $^{13}\text{C NMR}$  (101 MHz,  $\text{CDCl}_3$ )  $\delta$  174.38, 174.02, 153.93, 153.29, 138.72, 138.35, 128.58, 128.30, 122.24, 121.22, 118.21, 117.26, 115.70, 114.94, 73.64, 73.17, 61.17, 39.57, 38.93, 37.58, 36.37, 28.90, 27.18, 26.47, 24.99, 21.21, 19.58, 14.35, 14.23. **HRMS (ESI)** calcd for  $\text{C}_{15}\text{H}_{21}\text{O}_3^+$ ,  $[\text{M}+\text{H}]^+$ , 249.1485, found 249.1486.

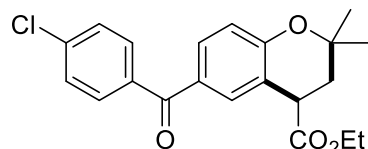

**Ethyl-6-(4-chlorobenzoyl)-2,2-dimethylchromane-4-carboxylate (24).** White solid was obtained in 56% isolated yield.  $^1\text{H NMR}$  (400 MHz,  $\text{CDCl}_3$ )  $\delta$  7.75–7.68 (m, 3H), 7.66 (dd,  $J = 8.5, 2.2$  Hz, 1H), 7.44 (d,  $J = 8.5$  Hz, 2H), 6.88 (d,  $J = 8.6$  Hz, 1H), 4.23 (m, 2H), 3.86 (dd,  $J = 10.2, 6.4$  Hz, 1H), 2.28 (dd,  $J = 13.8, 10.2$  Hz, 1H), 2.10 (dd,  $J = 13.8, 6.4$  Hz, 1H), 1.44 (s, 3H), 1.33 (s, 3H), 1.27 (t,  $J = 7.1$  Hz, 3H).  $^{13}\text{C NMR}$  (101 MHz,  $\text{CDCl}_3$ )  $\delta$  194.26, 173.16, 157.98, 138.30, 136.67, 132.60, 131.29, 131.18, 129.19,

128.57, 118.00, 117.86, 75.19, 61.57, 39.42, 35.94, 28.52, 25.48, 14.28. **HRMS (ESI)** calcd for  $C_{21}H_{22}ClO_4^+$ ,  $[M+H]^+$ , 373.1201, found 373.1201.

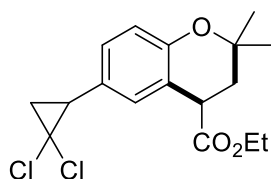

**Ethyl-6-(2,2-dichlorocyclopropyl)-2,2-dimethylchromane-4-carboxylate (25).** Faint yellow liquid was obtained in 57% isolated yield.  $^1H$  NMR (400 MHz,  $CDCl_3$ )  $\delta$  7.08–6.98 (m, 2H), 6.78 (d,  $J = 8.7$  Hz, 1H), 4.32–4.15 (m, 2H), 3.84 (m, 1H), 2.81 (dd,  $J = 10.7, 8.3$  Hz, 1H), 2.23 (m, 1H), 2.04 (dd,  $J = 13.6, 6.4$  Hz, 1H), 1.74 (m, 1H), 1.40 (s, 3H), 1.30 (dd,  $J = 13.0, 6.1$  Hz, 6H).  $^{13}C$  NMR (101 MHz,  $CDCl_3$ )  $\delta$  173.64, 173.61, 153.06, 153.05, 129.51, 129.43, 129.34, 128.98, 126.30, 126.08, 117.79, 117.74, 117.70, 117.68, 61.35, 61.33, 61.15, 61.02, 39.79, 36.16, 36.14, 35.04, 34.97, 28.73, 28.71, 26.00, 25.88, 25.20, 14.37. **HRMS (ESI)** calcd for  $C_{17}H_{21}Cl_2O_3^+$ ,  $[M+H]^+$ , 343.0862, found 343.0861.

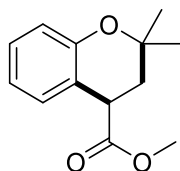

**Methyl (R)-2,2-dimethylchromane-4-carboxylate (26).** Faint yellow liquid was obtained in 64% isolated yield.  $^1H$  NMR (400 MHz,  $CDCl_3$ )  $\delta$  7.12–7.03 (m, 2H), 6.79 (m, 1H), 6.75–6.70 (m, 1H), 3.80 (dd,  $J = 10.5, 6.4$  Hz, 1H), 3.69 (s, 3H), 2.16 (dd,  $J = 13.6, 10.5$  Hz, 1H), 1.96 (dd,  $J = 13.5, 6.5$  Hz, 1H), 1.33 (s, 3H), 1.20 (s, 3H).  $^{13}C$  NMR (101 MHz,  $CDCl_3$ )  $\delta$  174.34, 153.52, 128.90, 128.76, 120.19, 117.94, 117.80, 73.71, 52.39, 39.77, 36.31, 28.78, 25.05. **HRMS (ESI)** calcd for  $C_{13}H_{17}O_3^+$ ,  $[M+H]^+$ , 221.1172, found 221.1168.

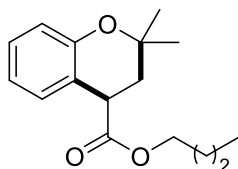

**Butyl-2,2-dimethylchromane-4-carboxylate (27).** Chartreuse liquid was obtained in 65% isolated yield.  $^1H$  NMR (400 MHz,  $CDCl_3$ )  $\delta$  7.14 (t,  $J = 7.4$  Hz, 2H), 6.86 (t,  $J = 7.5$  Hz, 1H), 6.80 (d,  $J = 8.2$  Hz, 1H), 4.17 (t,  $J = 6.7$  Hz, 2H), 3.85 (dd,  $J = 10.6, 6.4$  Hz, 1H), 2.23 (dd,  $J = 13.5, 10.5$  Hz, 1H), 2.03 (dd,  $J = 13.5, 6.4$  Hz, 1H), 1.65 (m, 2H), 1.39 (d,  $J = 13.4$  Hz, 5H), 1.27 (s, 3H), 0.94 (t,  $J = 7.4$  Hz, 3H).  $^{13}C$  NMR (101 MHz,  $CDCl_3$ )  $\delta$  173.95, 153.53, 128.89, 128.67, 120.14, 118.00, 117.89, 73.72, 65.14, 39.91, 36.33, 30.74, 28.87, 25.05, 19.26, 13.82. **HRMS (ESI)** calcd for  $C_{16}H_{23}O_3^+$ ,  $[M+H]^+$ , 263.1642, found 263.1639.

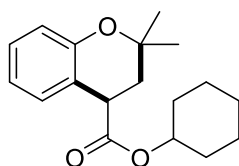

**Cyclohexyl-2,2-dimethylchromane-4-carboxylate (28).** Faint yellow liquid was obtained in 61% isolated yield.  $^1H$  NMR (400 MHz,  $CDCl_3$ )  $\delta$  7.20–7.10 (m, 2H), 6.85 (m, 1H), 6.80 (dd,  $J = 8.2, 1.2$  Hz,

1H), 4.87 (m, 1H), 3.82 (dd,  $J = 10.5, 6.4$  Hz, 1H), 2.23 (dd,  $J = 13.5, 10.5$  Hz, 1H), 2.02 (dd,  $J = 13.6, 6.4$  Hz, 1H), 1.96–1.81 (m, 2H), 1.79–1.65 (m, 2H), 1.59–1.31 (m, 9H), 1.28 (s, 3H).  $^{13}\text{C NMR}$  (101 MHz,  $\text{CDCl}_3$ )  $\delta$  173.29, 153.52, 128.89, 128.58, 120.09, 118.21, 117.84, 73.74, 73.51, 40.02, 36.30, 31.73, 31.57, 28.86, 25.46, 25.14, 23.85, 23.81. **HRMS (ESI)** calcd for  $\text{C}_{18}\text{H}_{25}\text{O}_3^+$ ,  $[\text{M}+\text{H}]^+$ , 289.1798, found 289.1798.

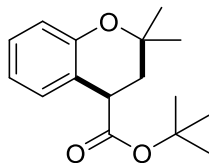

**Tert-butyl-2,2-dimethylchromane-4-carboxylate (29).** Faint yellow was obtained in 62% isolated yield.  $^1\text{H NMR}$  (400 MHz,  $\text{CDCl}_3$ )  $\delta$  7.19 (m, 1H), 7.17–7.09 (m, 1H), 6.86 (m, 1H), 6.79 (dd,  $J = 8.2, 1.3$  Hz, 1H), 3.73 (dd,  $J = 10.4, 6.4$  Hz, 1H), 2.19 (dd,  $J = 13.6, 10.4$  Hz, 1H), 2.00 (dd,  $J = 13.6, 6.5$  Hz, 1H), 1.49 (s, 9H), 1.40 (s, 3H), 1.27 (s, 3H).  $^{13}\text{C NMR}$  (101 MHz,  $\text{CDCl}_3$ )  $\delta$  172.99, 153.53, 128.88, 128.47, 120.05, 118.49, 117.81, 81.37, 73.75, 40.68, 36.33, 28.86, 28.17, 25.21. **HRMS (ESI)** calcd for  $\text{C}_{16}\text{H}_{23}\text{O}_3^+$ ,  $[\text{M}+\text{H}]^+$ , 263.1642, found 263.1633.

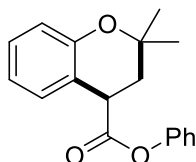

**Phenyl-2,2-dimethylchromane-4-carboxylate (30).** Colorless liquid was obtained in 44% isolated yield.  $^1\text{H NMR}$  (400 MHz,  $\text{CDCl}_3$ )  $\delta$  7.39 (t,  $J = 7.9$  Hz, 2H), 7.33 (dd,  $J = 7.7, 1.6$  Hz, 1H), 7.25–7.16 (m, 2H), 7.14–7.05 (m, 2H), 6.92 (m, 1H), 6.85 (dd,  $J = 8.2, 1.2$  Hz, 1H), 4.10 (dd,  $J = 10.4, 6.4$  Hz, 1H), 2.40 (dd,  $J = 13.5, 10.4$  Hz, 1H), 2.21 (dd,  $J = 13.5, 6.5$  Hz, 1H), 1.48 (s, 3H), 1.34 (s, 3H).  $^{13}\text{C NMR}$  (101 MHz,  $\text{CDCl}_3$ )  $\delta$  172.41, 153.62, 150.84, 129.63, 129.02, 128.93, 126.14, 121.48, 120.40, 118.15, 117.39, 73.79, 40.05, 36.27, 28.87, 25.14. **HRMS (ESI)** calcd for  $\text{C}_{18}\text{H}_{19}\text{O}_3^+$ ,  $[\text{M}+\text{H}]^+$ , 283.1329, found 283.1319.

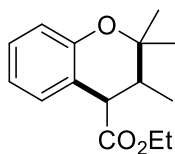

**Ethyl-2,2,3-trimethylchromane-4-carboxylate (31).** Faint yellow liquid was obtained in 29% isolated yield.  $^1\text{H NMR}$  (400 MHz,  $\text{CDCl}_3$ )  $\delta$  7.14 (t,  $J = 7.8$  Hz, 1H), 7.05 (d,  $J = 7.8$  Hz, 1H), 6.89–6.75 (m, 2H), 4.25 (m, 2H), 3.47 (d,  $J = 11.3$  Hz, 1H), 2.33 (m, 1H), 1.43 (s, 3H), 1.30 (t,  $J = 7.1$  Hz, 3H), 1.12 (s, 3H), 1.02 (d,  $J = 6.9$  Hz, 3H).  $^{13}\text{C NMR}$  (101 MHz,  $\text{CDCl}_3$ )  $\delta$  173.94, 153.18, 128.67, 127.70, 120.30, 119.37, 117.84, 61.19, 48.06, 39.00, 27.86, 19.23, 15.40, 14.43. **HRMS (ESI)** calcd for  $\text{C}_{15}\text{H}_{21}\text{O}_3^+$ ,  $[\text{M}+\text{H}]^+$ , 249.1485, found 249.1484.

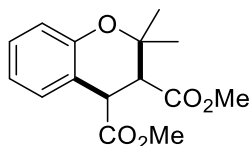

**Dimethyl-2,2-dimethylchromane-3,4-dicarboxylate (32).** Faint yellow liquid was obtained in 54% isolated yield.  $^1\text{H NMR}$  (400 MHz,  $\text{CDCl}_3$ )  $^1\text{H NMR}$  (400 MHz, Chloroform-*d*)  $\delta$  7.28 (dt,  $J = 7.8, 1.4$

Hz, 1H), 7.17 (m, 1H), 6.89 (td,  $J = 7.5, 1.3$  Hz, 1H), 6.83 (dd,  $J = 8.2, 1.3$  Hz, 1H), 4.31 – 4.17 (d,  $J = 11.9$  Hz, 1H), 3.76 (d,  $J = 12.2$  Hz, 8H), 3.30 (d,  $J = 11.9$  Hz, 1H), 1.53 (s, 4H), 1.23 (s, 4H).  $^{13}\text{C}$  NMR (101 MHz,  $\text{CDCl}_3$ )  $\delta$  172.60, 172.31, 152.40, 128.94, 127.55, 120.87, 117.94, 117.36, 77.48, 77.16, 76.84, 74.92, 52.60, 52.31, 50.71, 42.69, 28.57, 20.89. **HRMS (ESI)** calcd for  $\text{C}_{15}\text{H}_{19}\text{O}_5^+$ ,  $[\text{M}+\text{H}]^+$ , 279.1233, found 279.1239.

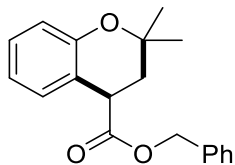

**Benzyl-2,2-dimethylchromane-4-carboxylate (33).** Yellow liquid was obtained in 64% isolated yield.  $^1\text{H}$  NMR (400 MHz,  $\text{CDCl}_3$ )  $\delta$  7.45–7.27 (m, 5H), 7.20–7.05 (m, 2H), 6.91–6.72 (m, 2H), 5.21 (s, 2H), 3.96–3.84 (m, 1H), 2.24 (dd,  $J = 13.6, 10.5$  Hz, 1H), 2.04 (dd,  $J = 13.6, 6.4$  Hz, 1H), 1.38 (s, 3H), 1.26 (s, 3H).  $^{13}\text{C}$  NMR (101 MHz,  $\text{CDCl}_3$ )  $\delta$  173.69, 153.54, 135.80, 128.94, 128.76, 128.71, 128.47, 128.45, 120.17, 117.92, 117.75, 73.72, 67.01, 39.83, 36.26, 28.82, 25.03. **HRMS (ESI)** calcd for  $\text{C}_{19}\text{H}_{21}\text{O}_3^+$ ,  $[\text{M}+\text{H}]^+$ , 296.1485, found 296.1488.

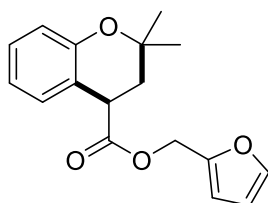

**Furan-2-ylmethyl-2,2-dimethylchromane-4-carboxylate (34).** Yellow liquid was obtained in 50% isolated yield.  $^1\text{H}$  NMR (400 MHz,  $\text{CDCl}_3$ )  $\delta$  7.43 (d,  $J = 1.8$  Hz, 1H), 7.19–7.04 (m, 2H), 6.90–6.73 (m, 2H), 6.43 (d,  $J = 3.4$  Hz, 1H), 6.40–6.30 (m, 1H), 5.21–5.12 (m, 2H), 3.88 (dd,  $J = 10.5, 6.4$  Hz, 1H), 2.22 (dd,  $J = 13.6, 10.5$  Hz, 1H), 2.03 (dd,  $J = 13.6, 6.4$  Hz, 1H), 1.37 (s, 3H), 1.25 (s, 3H).  $^{13}\text{C}$  NMR (101 MHz,  $\text{CDCl}_3$ )  $\delta$  173.53, 153.54, 149.34, 143.44, 128.89, 128.77, 120.19, 117.91, 117.64, 111.05, 110.73, 73.71, 58.69, 39.66, 36.19, 28.76, 25.05. **HRMS (ESI)** calcd for  $\text{C}_{17}\text{H}_{19}\text{O}_4^+$ ,  $[\text{M}+\text{H}]^+$ , 287.1279, found 287.1274.

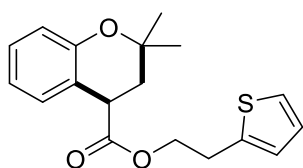

**2-(thiophen-2-yl)ethyl-2,2-dimethylchromane-4-carboxylate (35).** Yellow liquid was obtained in 67% isolated yield.  $^1\text{H}$  NMR (400 MHz,  $\text{CDCl}_3$ )  $\delta$  7.18–7.10 (m, 2H), 7.07 (m, 1H), 6.97–6.90 (m, 1H), 6.86–6.75 (m, 3H), 4.48–4.30 (m, 2H), 3.85 (dd,  $J = 10.3, 6.4$  Hz, 1H), 3.19 (t,  $J = 6.6$  Hz, 2H), 2.22 (dd,  $J = 13.6, 10.3$  Hz, 1H), 2.01 (dd,  $J = 13.6, 6.5$  Hz, 1H), 1.37 (s, 3H), 1.26 (s, 3H).  $^{13}\text{C}$  NMR (101 MHz,  $\text{CDCl}_3$ )  $\delta$  173.72, 153.53, 139.80, 129.02, 128.72, 127.02, 125.82, 124.18, 120.20, 117.90, 117.70, 73.70, 65.41, 39.79, 36.22, 29.35, 28.68, 25.13. **HRMS (ESI)** calcd for  $\text{C}_{18}\text{H}_{21}\text{O}_3\text{S}^+$ ,  $[\text{M}+\text{H}]^+$ , 317.1206, found 317.1210.

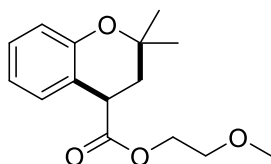

**2-methoxyethyl-2,2-dimethylchromane-4-carboxylate (36).** Faint yellow liquid was obtained in 62% isolated yield.  $^1\text{H NMR}$  (400 MHz,  $\text{CDCl}_3$ )  $\delta$  7.22–7.09 (m, 2H), 6.86 (m, 1H), 6.80 (dd,  $J = 8.2, 1.2$  Hz, 1H), 4.42–4.26 (m, 2H), 3.92 (dd,  $J = 10.7, 6.4$  Hz, 1H), 3.63 (t,  $J = 4.7$  Hz, 2H), 3.39 (s, 3H), 2.24 (dd,  $J = 13.6, 10.8$  Hz, 1H), 2.05 (dd,  $J = 13.6, 6.4$  Hz, 1H), 1.41 (s, 3H), 1.27 (s, 3H).  $^{13}\text{C NMR}$  (101 MHz,  $\text{CDCl}_3$ )  $\delta$  173.92, 153.57, 128.85, 128.73, 120.19, 117.91, 117.84, 73.72, 70.49, 64.12, 59.08, 39.67, 36.28, 28.93, 24.96. **HRMS (ESI)** calcd for  $\text{C}_{15}\text{H}_{21}\text{O}_4^+$ ,  $[\text{M}+\text{H}]^+$ , 265.1434, found 265.1429.

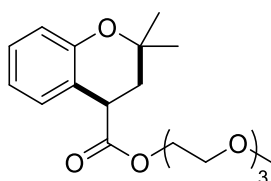

**2-methoxyethyl (R)-2,2-dimethylchromane-4-carboxylate (37).** Faint yellow liquid was obtained in 67% isolated yield.  $^1\text{H NMR}$  (400 MHz,  $\text{CDCl}_3$ )  $\delta$  7.19 (m, 1H), 7.14 (m, 1H), 6.86 (dd,  $J = 7.5, 1.3$  Hz, 1H), 6.80 (dd,  $J = 8.2, 1.3$  Hz, 1H), 4.35 (m, 2H), 3.90 (dd,  $J = 10.6, 6.4$  Hz, 1H), 3.73 (t,  $J = 4.8$  Hz, 2H), 3.64 (d,  $J = 8.2$  Hz, 6H), 3.55 (dd,  $J = 5.8, 3.5$  Hz, 2H), 3.38 (s, 3H), 2.23 (dd,  $J = 13.6, 10.6$  Hz, 1H), 2.05 (dd,  $J = 13.6, 6.4$  Hz, 1H), 1.41 (s, 3H), 1.27 (s, 3H).  $^{13}\text{C NMR}$  (101 MHz,  $\text{CDCl}_3$ )  $\delta$  173.80, 153.50, 128.86, 128.66, 120.12, 117.84, 117.79, 73.66, 71.98, 70.68, 70.64, 70.61, 69.09, 64.17, 59.11, 39.62, 36.19, 28.84, 24.95. **HRMS (ESI)** calcd for  $\text{C}_{19}\text{H}_{29}\text{O}_6^+$ ,  $[\text{M}+\text{H}]^+$ , 353.1959, found 353.1962.

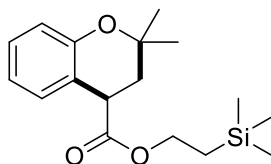

**2-(trimethylsilyl)ethyl-2,2-dimethylchromane-4-carboxylate (38).** Faint yellow liquid was obtained in 64% isolated yield.  $^1\text{H NMR}$  (400 MHz,  $\text{CDCl}_3$ )  $\delta$  7.22–7.05 (m, 2H), 6.93–6.83 (m, 1H), 6.83–6.75 (m, 1H), 4.26 (m, 2H), 3.84 (m, 1H), 2.23 (m, 1H), 2.03 (m, 1H), 1.41 (s, 3H), 1.28 (s, 3H), 1.08–0.97 (m, 2H), 0.04 (s, 9H).  $^{13}\text{C NMR}$  (101 MHz,  $\text{CDCl}_3$ )  $\delta$  174.02, 153.53, 128.90, 128.65, 120.15, 118.05, 117.89, 73.72, 63.58, 39.99, 36.34, 28.91, 25.03, 17.52, -1.39. **HRMS (ESI)** calcd for  $\text{C}_{17}\text{H}_{26}\text{O}_3\text{SiNa}^+$ ,  $[\text{M}+\text{Na}]^+$ , 329.1543, found 329.1544.

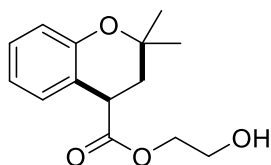

**2-hydroxyethyl-2,2-dimethylchromane-4-carboxylate (39).** Faint yellow liquid was obtained in 42% isolated yield.  $^1\text{H NMR}$  (400 MHz,  $\text{CDCl}_3$ )  $\delta$  7.20–7.11 (m, 2H), 6.87 (m, 1H), 6.81 (m, 1H), 4.31 (m,

2H), 3.92 (m, 1H), 3.84 (t,  $J = 4.6$  Hz, 2H), 2.23 (dd,  $J = 13.5, 10.6$  Hz, 1H), 2.07 (dd,  $J = 13.4, 6.3$  Hz, 1H), 2.00 (s, 1H), 1.42 (s, 3H), 1.28 (s, 3H).  $^{13}\text{C}$  NMR (101 MHz,  $\text{CDCl}_3$ )  $\delta$  174.31, 153.54, 128.87, 128.75, 120.27, 118.03, 117.70, 66.76, 61.23, 39.90, 36.34, 28.90, 24.94. HRMS (ESI) calcd for  $\text{C}_{14}\text{H}_{19}\text{O}_4^+$ ,  $[\text{M}+\text{H}]^+$ , 251.1278, found 251.1277.

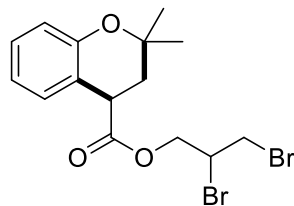

**2,3-dibromopropyl-2,2-dimethylchromane-4-carboxylate (40).** Faint yellow liquid was obtained in 53% isolated yield.  $^1\text{H}$  NMR (400 MHz,  $\text{CDCl}_3$ )  $\delta$  7.24–7.11 (m, 2H), 6.88 (m, 1H), 6.82 (d,  $J = 8.2$  Hz, 1H), 4.71–4.48 (m, 2H), 4.35 (m, 1H), 3.94 (dd,  $J = 10.2, 6.5$  Hz, 1H), 3.77 (m, 1H), 3.72–3.62 (m, 1H), 2.26 (m, 1H), 2.15–1.99 (m, 1H), 1.42 (d,  $J = 4.4$  Hz, 3H), 1.29 (d,  $J = 1.9$  Hz, 3H).  $^{13}\text{C}$  NMR (101 MHz,  $\text{CDCl}_3$ )  $\delta$  173.18, 173.16, 153.52, 153.50, 129.27, 129.08, 128.94, 120.26, 120.24, 118.02, 118.00, 117.29, 117.25, 73.71, 65.83, 65.78, 46.69, 46.66, 39.84, 39.74, 36.28, 32.05, 32.00, 28.73, 28.58, 25.26, 25.11. HRMS (ESI) calcd for  $\text{C}_{15}\text{H}_{19}\text{Br}_2\text{O}_3^+$ ,  $[\text{M}+\text{H}]^+$ , 404.9695, found 404.9699.

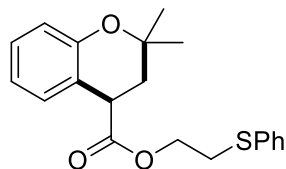

**2-(phenylthio)ethyl-2,2-dimethylchromane-4-carboxylate (41).** Faint yellow liquid was obtained in 53% isolated yield.  $^1\text{H}$  NMR (400 MHz,  $\text{CDCl}_3$ )  $\delta$  7.39 (d,  $J = 7.7$  Hz, 2H), 7.29 (t,  $J = 7.5$  Hz, 2H), 7.19 (m, 7.9 Hz, 3H), 6.86 (t,  $J = 7.5$  Hz, 1H), 6.80 (d,  $J = 8.2$  Hz, 1H), 4.33 (t,  $J = 6.9$  Hz, 2H), 3.83 (dd,  $J = 10.5, 6.5$  Hz, 1H), 3.17 (t,  $J = 6.9$  Hz, 2H), 2.18 (dd,  $J = 13.6, 10.5$  Hz, 1H), 1.99 (dd,  $J = 13.6, 6.5$  Hz, 1H), 1.39 (s, 3H), 1.26 (s, 3H).  $^{13}\text{C}$  NMR (101 MHz,  $\text{CDCl}_3$ )  $\delta$  173.70, 153.53, 135.06, 130.11, 129.22, 128.95, 128.80, 126.82, 120.22, 117.95, 117.61, 77.48, 77.16, 76.84, 73.70, 63.62, 39.74, 36.22, 32.48, 28.83, 25.00. HRMS (ESI) calcd for  $\text{C}_{20}\text{H}_{23}\text{O}_3\text{S}^+$ ,  $[\text{M}+\text{H}]^+$ , 342.1290, found 342.1280.

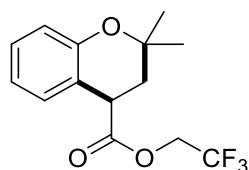

**2,2,2-trifluoroethyl (R)-2,2-dimethylchromane-4-carboxylate (42).** White solid was obtained in 52% isolated yield.  $^1\text{H}$  NMR (400 MHz,  $\text{CDCl}_3$ )  $\delta$  7.17 (t,  $J = 7.4$  Hz, 1H), 7.12 (d,  $J = 7.7$  Hz, 1H), 6.88 (t,  $J = 7.5$  Hz, 1H), 6.82 (d,  $J = 8.2$  Hz, 1H), 4.57 (m, 2H), 3.98 (dd,  $J = 10.4, 6.5$  Hz, 1H), 2.24 (dd,  $J = 13.6, 10.3$  Hz, 1H), 2.09 (dd,  $J = 13.6, 6.5$  Hz, 1H), 1.41 (s, 3H), 1.29 (s, 3H).  $^{13}\text{C}$  NMR (101 MHz,  $\text{CDCl}_3$ )  $\delta$  172.46, 153.56, 129.15, 128.86, 123.01 (q,  $J = 277.8$  Hz), 120.40, 118.14, 116.72, 73.67, 61.34, 60.97, 60.61, 60.24, 39.46, 36.19, 28.68, 25.02, 1.17.  $^{19}\text{F}$  NMR (377 MHz,  $\text{CDCl}_3$ )  $\delta$  -73.60. HRMS (ESI) calcd for  $\text{C}_{14}\text{H}_{15}\text{F}_3\text{O}_4\text{Na}^+$ ,  $[\text{M}+\text{Na}]^+$ , 311.0866, found 311.0865.



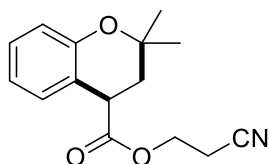

**2-cyanoethyl (R)-2,2-dimethylchromane-4-carboxylate (43).** Faint yellow liquid was obtained in 59% isolated yield.  $^1\text{H NMR}$  (400 MHz,  $\text{CDCl}_3$ )  $\delta$  7.17 (t,  $J = 8.0$  Hz, 2H), 6.92–6.85 (m, 1H), 6.82 (d,  $J = 8.1$  Hz, 1H), 4.37 (t,  $J = 6.2$  Hz, 2H), 3.93 (dd,  $J = 10.4, 6.5$  Hz, 1H), 2.74 (t,  $J = 6.2$  Hz, 2H), 2.24 (dd,  $J = 13.6, 10.4$  Hz, 1H), 2.09 (dd,  $J = 13.6, 6.5$  Hz, 1H), 1.42 (s, 3H), 1.28 (s, 3H).  $^{13}\text{C NMR}$  (101 MHz,  $\text{CDCl}_3$ )  $\delta$  173.43, 153.52, 128.99, 128.86, 120.32, 118.06, 117.08, 116.78, 73.68, 59.37, 39.59, 36.22, 28.73, 24.95, 18.09. **HRMS (ESI)** calcd for  $\text{C}_{15}\text{H}_{18}\text{NO}_3^+$ ,  $[\text{M}+\text{H}]^+$ , 260.1281, found 260.1279.x

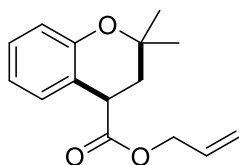

**Allyl-2,2-dimethylchromane-4-carboxylate (44).** Faint yellow liquid was obtained in 51% isolated yield.  $^1\text{H NMR}$  (400 MHz,  $\text{CDCl}_3$ )  $\delta$  7.15 (t,  $J = 7.8$  Hz, 2H), 6.86 (m, 1H), 6.81 (d,  $J = 8.2$  Hz, 1H), 5.94 (m, 1H), 5.34 (dd,  $J = 17.2, 1.5$  Hz, 1H), 5.26 (dd,  $J = 10.3, 1.4$  Hz, 1H), 4.67 (dd,  $J = 5.9, 1.4$  Hz, 2H), 3.89 (dd,  $J = 10.5, 6.4$  Hz, 1H), 2.25 (dd,  $J = 13.5, 10.5$  Hz, 1H), 2.05 (dd,  $J = 13.6, 6.4$  Hz, 1H), 1.41 (s, 3H), 1.28 (s, 3H).  $^{13}\text{C NMR}$  (101 MHz,  $\text{CDCl}_3$ )  $\delta$  173.53, 153.55, 132.01, 128.93, 128.77, 120.20, 118.86, 117.94, 117.78, 73.73, 65.88, 39.84, 36.32, 28.85, 25.06. **HRMS (ESI)** calcd for  $\text{C}_{15}\text{H}_{19}\text{O}_3^+$ ,  $[\text{M}+\text{H}]^+$ , 247.1329, found 247.1327.

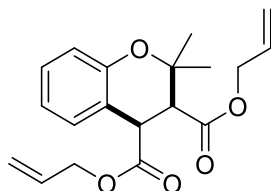

**Diallyl-2,2-dimethylchromane-3,4-dicarboxylate (45).** Faint yellow liquid was obtained in 31% isolated yield.  $^1\text{H NMR}$  (400 MHz,  $\text{CDCl}_3$ )  $\delta$  7.32 (m, 1H), 7.21–7.13 (m, 1H), 6.89 (m, 1H), 6.83 (dd,  $J = 8.2, 1.3$  Hz, 1H), 6.04–5.81 (m, 2H), 5.37 (m, 1H), 5.33 (m, 1H), 5.30–5.22 (m, 2H), 4.77–4.54 (m, 4H), 4.25 (d,  $J = 11.9$  Hz, 1H), 3.32 (d,  $J = 11.9$  Hz, 1H), 1.55 (s, 3H), 1.24 (s, 3H).  $^{13}\text{C NMR}$  (101 MHz,  $\text{CDCl}_3$ )  $\delta$  171.76, 171.48, 152.47, 131.75, 131.67, 128.99, 127.63, 120.91, 119.18, 118.99, 117.98, 117.41, 75.04, 66.20, 65.99, 50.85, 42.80, 28.68, 21.01. **HRMS (ESI)** calcd for  $\text{C}_{19}\text{H}_{23}\text{O}_5^+$ ,  $[\text{M}+\text{H}]^+$ , 331.1540, found 331.1539.

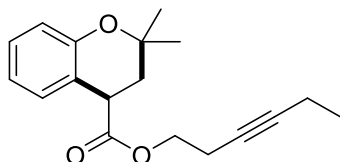

**Hex-3-yn-1-yl-2,2-dimethylchromane-4-carboxylate (46).** Faint yellow liquid was obtained in 67% isolated yield.  $^1\text{H NMR}$  (400 MHz,  $\text{CDCl}_3$ )  $\delta$  7.21 (d,  $J = 7.7$  Hz, 1H), 7.15 (t,  $J = 7.6$  Hz, 1H), 6.89 – 6.83 (m, 1H), 6.80 (d,  $J = 8.2$  Hz, 1H), 4.24 (m, 2H), 3.88 (dd,  $J = 10.5, 6.4$  Hz, 1H), 2.53 (m, 2H), 2.25 (dd,  $J = 13.6, 10.5$  Hz, 1H), 2.16 (m, 2H), 2.04 (dd,  $J = 13.6, 6.5$  Hz, 1H), 1.41 (s, 3H), 1.28 (s, 3H), 1.12

(t,  $J = 7.5$  Hz, 3H).  $^{13}\text{C}$  NMR (101 MHz,  $\text{CDCl}_3$ )  $\delta$  173.68, 153.54, 128.98, 128.73, 120.18, 117.91, 117.77, 83.67, 74.93, 73.71, 63.58, 39.75, 36.29, 28.82, 25.07, 19.36, 14.23, 12.48. HRMS (ESI) calcd for  $\text{C}_{18}\text{H}_{23}\text{O}_3^+$ ,  $[\text{M}+\text{H}]^+$ , 287.1642, found 287.1644.

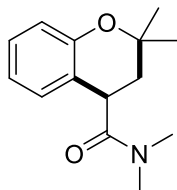

***N,N,2,2*-tetramethylchromane-4-carboxamide (47)**. Faint yellow liquid was obtained in 47% isolated yield.  $^1\text{H}$  NMR (400 MHz,  $\text{CDCl}_3$ )  $\delta$  7.17–7.07 (m, 1H), 6.92 (d,  $J = 7.9$  Hz, 1H), 6.88 – 6.75 (m, 2H), 4.15 (dd,  $J = 12.3, 5.8$  Hz, 1H), 3.07 (d,  $J = 10.0$  Hz, 6H), 2.18 (t,  $J = 12.9$  Hz, 1H), 1.93 (dd,  $J = 13.5, 5.8$  Hz, 1H), 1.46 (s, 3H), 1.29 (s, 3H).  $^{13}\text{C}$  NMR (101 MHz,  $\text{CDCl}_3$ )  $\delta$  173.45, 153.66, 128.39, 127.53, 120.39, 119.88, 117.89, 74.09, 37.86, 37.43, 36.55, 36.27, 30.02, 24.82. HRMS (ESI) calcd for  $\text{C}_{14}\text{H}_{20}\text{NO}_2^+$ ,  $[\text{M}+\text{H}]^+$ , 234.1489, found 234.1487.

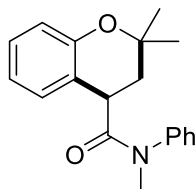

**2,2-trimethyl-*N*-phenylchromane-4-carboxamide (48)**. Colorless solid was obtained in 39% isolated yield.  $^1\text{H}$  NMR (400 MHz,  $\text{CDCl}_3$ )  $\delta$  7.45 (t,  $J = 7.5$  Hz, 2H), 7.38 (d,  $J = 7.2$  Hz, 1H), 7.31 (d,  $J = 7.6$  Hz, 2H), 7.09 (t,  $J = 7.7$  Hz, 1H), 7.03 (d,  $J = 7.7$  Hz, 1H), 6.86 (t,  $J = 7.4$  Hz, 1H), 6.73 (d,  $J = 8.2$  Hz, 1H), 3.85 (dd,  $J = 12.3, 5.6$  Hz, 1H), 3.40 (s, 3H), 2.17 (t,  $J = 12.8$  Hz, 1H), 1.78 (dd,  $J = 13.3, 5.6$  Hz, 1H), 1.39 (s, 3H), 0.89 (s, 3H).  $^{13}\text{C}$  NMR (101 MHz,  $\text{CDCl}_3$ )  $\delta$  174.19, 153.84, 144.10, 130.17, 128.39, 128.22, 128.11, 127.14, 120.37, 120.21, 117.71, 73.71, 37.88, 37.29, 37.16, 29.92, 24.21. HRMS (ESI) calcd for  $\text{C}_{19}\text{H}_{22}\text{NO}_2^+$ ,  $[\text{M}+\text{H}]^+$ , 295.1645, found 295.1647.

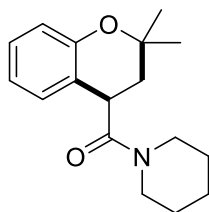

**(2,2-dimethylchroman-4-yl)(piperidin-1-yl)methanone (49)**. Faint yellow liquid was obtained in 45% isolated yield.  $^1\text{H}$  NMR (400 MHz,  $\text{CDCl}_3$ )  $\delta$  7.12 (t,  $J = 7.8$  Hz, 1H), 6.99 (d,  $J = 7.7$  Hz, 1H), 6.86 (d,  $J = 7.6$  Hz, 1H), 6.80 (d,  $J = 8.2$  Hz, 1H), 4.15 (dd,  $J = 12.5, 6.1$  Hz, 1H), 3.79–3.66 (m, 1H), 3.59 (q,  $J = 9.0, 7.5$  Hz, 1H), 3.38 (t,  $J = 5.6$  Hz, 2H), 2.14 (t,  $J = 12.9$  Hz, 1H), 1.96 (dd,  $J = 13.8, 6.1$  Hz, 1H), 1.70–1.34 (m, 9H), 1.28 (s, 3H).  $^{13}\text{C}$  NMR (101 MHz,  $\text{CDCl}_3$ )  $\delta$  171.79, 153.36, 128.34, 127.76, 120.41, 120.18, 117.91, 74.20, 47.28, 43.53, 38.32, 36.74, 30.02, 26.49, 25.87, 24.68, 24.60. HRMS (ESI) calcd for  $\text{C}_{17}\text{H}_{24}\text{NO}_2^+$ ,  $[\text{M}+\text{H}]^+$ , 274.1802, found 274.1801.

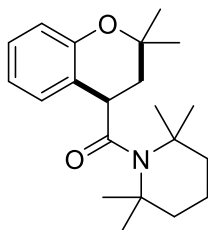

**(2,2-dimethylchroman-4-yl)(2,2,6,6-tetramethylpiperidin-1-yl)methanone (50).** White solid was obtained in 48% isolated yield.  $^1\text{H NMR}$  (400 MHz,  $\text{CDCl}_3$ )  $\delta$  7.18–7.06 (m, 2H), 6.87–6.75 (m, 2H), 4.23 (dd,  $J = 12.2, 5.5$  Hz, 1H), 2.18 (t,  $J = 12.7$  Hz, 1H), 2.03–1.70 (m, 7H), 1.50 (d,  $J = 32.1$  Hz, 15H), 1.29 (s, 3H).  $^{13}\text{C NMR}$  (101 MHz,  $\text{CDCl}_3$ )  $\delta$  178.81, 154.10, 128.42, 128.03, 121.01, 119.89, 117.78, 74.02, 42.67, 38.60, 30.10, 24.64, 14.51. **HRMS (ESI)** calcd for  $\text{C}_{21}\text{H}_{32}\text{NO}_2^+$ ,  $[\text{M}+\text{H}]^+$ , 330.2428, found 330.2430.

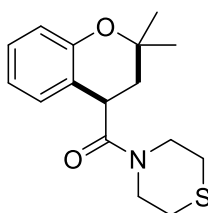

**(2,2-dimethylchroman-4-yl)(thiomorpholino)methanone (51).** Yellow solid was obtained in 35% isolated yield.  $^1\text{H NMR}$  (400 MHz,  $\text{CDCl}_3$ )  $\delta$  7.14 (t,  $J = 7.8$  Hz, 1H), 6.98 (t,  $J = 7.7$  Hz, 1H), 6.87 (t,  $J = 7.5$  Hz, 1H), 6.81 (d,  $J = 8.2$  Hz, 1H), 4.39 (m, 1H), 4.14 (m, 1H), 4.06–3.46 (m, 3H), 3.41–3.22 (m, 1H), 2.04 (m, 2H), 1.87 (d,  $J = 7.0$  Hz, 1H), 1.47 (s, 3H), 1.33–1.17 (m, 3H).  $^{13}\text{C NMR}$  (101 MHz,  $\text{CDCl}_3$ )  $\delta$  172.05, 153.25, 128.64, 127.57, 120.62, 119.75, 118.16, 74.24, 49.19, 48.54, 44.58, 43.90, 40.97, 40.18, 39.19, 38.83, 36.72, 36.59, 36.10, 35.74, 35.56, 35.28, 24.58, 24.51. **HRMS (ESI)** calcd for  $\text{C}_{16}\text{H}_{22}\text{NO}_2\text{S}^+$ ,  $[\text{M}+\text{H}]^+$ , 292.1366, found 292.1365.

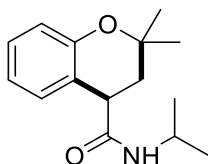

**N-isopropyl-2,2-dimethylchromane-4-carboxamide (52).** White solid was obtained in 54% isolated yield.  $^1\text{H NMR}$  (400 MHz,  $\text{CDCl}_3$ )  $\delta$  7.23–7.13 (m, 1H), 7.10 (d,  $J = 7.3$  Hz, 1H), 6.89 (m, 1H), 6.86–6.78 (m, 1H), 5.58–5.39 (m, 1H), 4.20–4.04 (m, 1H), 3.66 (dd,  $J = 9.0, 6.7$  Hz, 1H), 2.20 (dd,  $J = 13.7, 9.0$  Hz, 1H), 2.08 (dd,  $J = 13.7, 6.7$  Hz, 1H), 1.37 (s, 3H), 1.29 (s, 3H), 1.11 (dd,  $J = 15.1, 6.6$  Hz, 6H).  $^{13}\text{C NMR}$  (101 MHz,  $\text{CDCl}_3$ )  $\delta$  172.84, 154.25, 129.35, 129.08, 120.47, 118.56, 118.31, 74.46, 41.94, 41.67, 37.24, 28.24, 25.85, 22.60, 22.58. **HRMS (ESI)** calcd for  $\text{C}_{15}\text{H}_{22}\text{NO}_2^+$ ,  $[\text{M}+\text{H}]^+$ , 248.1645, found 248.1647.

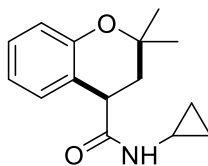

***N*-cyclopropyl-2,2-dimethylchromane-4-carboxamide (53)**. White solid was obtained in 57% isolated yield.  $^1\text{H NMR}$  (400 MHz,  $\text{CDCl}_3$ )  $\delta$  7.22–7.13 (m, 1H), 7.10–7.02 (m, 1H), 6.88 (m, 2H), 6.83 (dd,  $J = 8.2, 1.3$  Hz, 1H), 5.79 (s, 1H), 3.67 (dd,  $J = 9.0, 6.7$  Hz, 1H), 2.72 (m, 1H), 2.18 (dd,  $J = 13.7, 9.0$  Hz, 1H), 2.07 (dd,  $J = 13.7, 6.8$  Hz, 1H), 1.31 (d,  $J = 31.2$  Hz, 6H), 0.90–0.64 (m, 2H), 0.56–0.29 (m, 2H).  $^{13}\text{C NMR}$  (101 MHz,  $\text{CDCl}_3$ )  $\delta$  175.28, 154.21, 129.33, 129.15, 120.53, 118.41, 118.34, 74.45, 41.80, 37.23, 28.23, 25.82, 22.96, 6.73, 6.66. **HRMS (ESI)** calcd for  $\text{C}_{15}\text{H}_{20}\text{NO}_3^+$ ,  $[\text{M}+\text{H}]^+$ , 246.1489, found 246.1483.

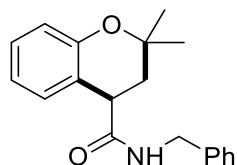

***N*-benzyl-2,2-dimethylchromane-4-carboxamide (54)**. White solid was obtained in 59% isolated yield.  $^1\text{H NMR}$  (400 MHz,  $\text{CDCl}_3$ )  $\delta$  7.35–7.20 (m, 4H), 7.20–7.08 (m, 2H), 6.87 (t,  $J = 7.5$  Hz, 1H), 6.82 (d,  $J = 8.1$  Hz, 1H), 6.05–5.95 (m, 1H), 4.46 (dd,  $J = 5.9, 2.5$  Hz, 2H), 3.76 (dd,  $J = 9.2, 6.7$  Hz, 1H), 2.17 (dd,  $J = 28.9, 8.0$  Hz, 1H), 1.68 (s, 1H), 1.36 (s, 3H), 1.28 (s, 3H).  $^{13}\text{C NMR}$  (101 MHz,  $\text{CDCl}_3$ )  $\delta$  173.78, 154.28, 138.12, 129.46, 129.21, 128.83, 127.84, 127.67, 120.56, 118.39, 118.31, 74.46, 43.92, 42.00, 37.38, 28.35, 25.69, 1.16. **HRMS (ESI)** calcd for  $\text{C}_{19}\text{H}_{22}\text{NO}_2^+$ ,  $[\text{M}+\text{H}]^+$ , 296.1645, found 296.1650.

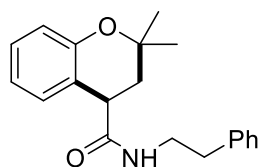

**2,2-dimethyl-*N*-phenethylchromane-4-carboxamide (55)**. White solid was obtained in 55% isolated yield.  $^1\text{H NMR}$  (400 MHz,  $\text{CDCl}_3$ )  $\delta$  7.27 (d,  $J = 6.5$  Hz, 1H), 7.25–7.18 (m, 2H), 7.14 (m, 3H), 6.99–6.88 (m, 1H), 6.86–6.70 (m, 2H), 5.74 (t,  $J = 5.9$  Hz, 1H), 3.68–3.59 (m, 1H), 3.59–3.52 (m, 1H), 3.47 (m, 1H), 2.79 (m, 2H), 2.15 (dd,  $J = 13.7, 8.8$  Hz, 1H), 2.03 (dd,  $J = 13.6, 6.9$  Hz, 1H), 1.28 (d,  $J = 23.5$  Hz, 6H).  $^{13}\text{C NMR}$  (101 MHz,  $\text{CDCl}_3$ )  $\delta$  173.70, 154.16, 138.67, 129.44, 129.02, 128.80, 128.71, 126.61, 120.44, 118.28, 118.22, 74.38, 41.83, 40.87, 37.14, 35.49, 28.09, 25.87. **HRMS (ESI)** calcd for  $\text{C}_{20}\text{H}_{24}\text{NO}_2^+$ ,  $[\text{M}+\text{H}]^+$ , 310.1802, found 310.1803.

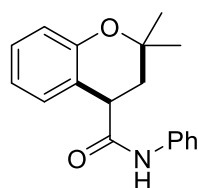

**2,2-dimethyl-*N*-phenylchromane-4-carboxamide (56)**. White solid was obtained in 56% isolated yield.  $^1\text{H NMR}$  (400 MHz,  $\text{CDCl}_3$ )  $\delta$  7.50–7.40 (m, 3H), 7.29 (t,  $J = 7.8$  Hz, 2H), 7.24–7.17 (m, 2H), 7.10 (t,  $J = 7.4$  Hz, 1H), 6.93 (m, 1H), 6.90–6.85 (m, 1H), 3.85 (dd,  $J = 9.1, 6.7$  Hz, 1H), 2.31 (dd,  $J = 13.7, 9.1$  Hz, 1H), 2.16 (dd,  $J = 13.7, 6.7$  Hz, 1H), 1.40 (s, 3H), 1.30 (s, 3H).  $^{13}\text{C NMR}$  (101 MHz,  $\text{CDCl}_3$ )  $\delta$  172.07, 154.36, 137.66, 129.53, 129.44, 129.11, 124.72, 120.80, 120.07, 118.58, 118.04, 74.52, 43.03, 37.26, 28.33, 25.77. **HRMS (ESI)** calcd for  $\text{C}_{18}\text{H}_{20}\text{NO}_2^+$ ,  $[\text{M}+\text{H}]^+$ , 282.1489, found 282.1485.

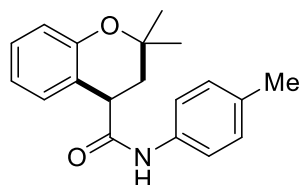

**2,2-dimethyl-N-(p-tolyl)chromane-4-carboxamide (57).** White solid was obtained in 57% isolated yield.  $^1\text{H NMR}$  (400 MHz,  $\text{CDCl}_3$ )  $\delta$  7.43 (s, 1H), 7.32 (dd,  $J = 6.4, 4.3$  Hz, 2H), 7.25–7.16 (m, 2H), 7.09 (d,  $J = 8.1$  Hz, 2H), 6.92 (m, 1H), 6.90–6.83 (m, 1H), 3.83 (dd,  $J = 9.1, 6.6$  Hz, 1H), 2.30 (s, 4H), 2.15 (dd,  $J = 13.7, 6.7$  Hz, 1H), 1.39 (s, 3H), 1.30 (s, 3H).  $^{13}\text{C NMR}$  (101 MHz,  $\text{CDCl}_3$ )  $\delta$  171.95, 154.35, 135.09, 134.38, 129.57, 129.46, 120.76, 120.17, 118.53, 118.15, 74.51, 42.91, 37.23, 28.29, 25.80, 20.98. **HRMS (ESI)** calcd for  $\text{C}_{19}\text{H}_{22}\text{NO}_2^+$ ,  $[\text{M}+\text{H}]^+$ , 296.1645, found 296.1648.

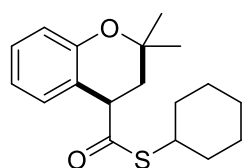

**S-cyclohexyl-2,2-dimethylchromane-4-carbothioate (58).** Colorless liquid was obtained in 36% isolated yield.  $^1\text{H NMR}$  (400 MHz,  $\text{CDCl}_3$ )  $\delta$  7.16 (m, 2H), 6.86 (t,  $J = 7.5$  Hz, 1H), 6.83–6.76 (m, 1H), 3.97 (dd,  $J = 10.6, 6.4$  Hz, 1H), 3.57 (m, 1H), 2.21 (dd,  $J = 13.5, 10.6$  Hz, 1H), 2.04 (dd,  $J = 13.5, 6.5$  Hz, 1H), 1.99–1.86 (m, 2H), 1.71 (t,  $J = 7.1$  Hz, 2H), 1.42 (d,  $J = 6.1$  Hz, 7H), 1.26 (s, 5H).  $^{13}\text{C NMR}$  (101 MHz,  $\text{CDCl}_3$ )  $\delta$  201.38, 153.87, 129.32, 129.02, 120.13, 118.09, 117.94, 74.05, 48.38, 42.88, 37.49, 33.14, 33.03, 29.21, 26.10, 25.67, 24.97. **HRMS (ESI)** calcd for  $\text{C}_{18}\text{H}_{25}\text{O}_2\text{S}^+$ ,  $[\text{M}+\text{H}]^+$ , 305.1570, found 305.1571.

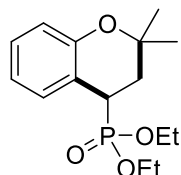

**Diethyl-(2,2-dimethylchroman-4-yl)phosphonate (59).** White solid was obtained in 67% isolated yield.  $^1\text{H NMR}$  (400 MHz,  $\text{CDCl}_3$ )  $\delta$  7.86 (d,  $J = 7.8$  Hz, 1H), 7.14 (t,  $J = 7.7$  Hz, 1H), 6.88 (t,  $J = 7.5$  Hz, 1H), 6.80 (d,  $J = 8.2$  Hz, 1H), 4.24–3.99 (m, 3H), 3.98–3.80 (m, 1H), 3.42 (m, 1H), 2.19–1.95 (m, 2H), 1.47 (s, 3H), 1.33 (t,  $J = 7.1$  Hz, 3H), 1.19 (s, 3H), 1.14 (t,  $J = 7.1$  Hz, 3H).  $^{13}\text{C NMR}$  (101 MHz,  $\text{CDCl}_3$ )  $\delta$  154.00, 153.92, 129.46, 129.41, 128.48, 128.46, 120.22, 120.20, 118.09, 115.96, 115.91, 73.28, 73.16, 63.09, 63.03, 61.82, 61.75, 34.95, 34.90, 32.28, 30.84, 29.80, 23.20, 16.55, 16.49, 16.43, 16.38. **HRMS (ESI)** calcd for  $\text{C}_{15}\text{H}_{24}\text{O}_4\text{P}^+$ ,  $[\text{M}+\text{H}]^+$ , 299.1407, found 299.1406.

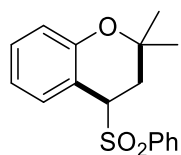

**2,2-dimethyl-4-(phenylsulfonyl)chromane (60).** Yellow solid was obtained in 50% isolated yield.  $^1\text{H NMR}$  (400 MHz,  $\text{CDCl}_3$ )  $\delta$  8.07 (d,  $J = 8.0$  Hz, 1H), 7.69–7.61 (m, 2H), 7.58 (t,  $J = 7.4$  Hz, 1H), 7.43 (t,  $J = 7.7$  Hz, 2H), 7.25–7.14 (m, 1H), 7.02–6.90 (m, 1H), 6.71 (d,  $J = 7.9$  Hz, 1H), 4.55 (dd,  $J = 11.4, 7.5$  Hz, 1H), 2.19 (dd,  $J = 13.8, 7.6$  Hz, 1H), 2.01 (dd,  $J = 13.9, 11.5$  Hz, 1H), 1.37 (s, 3H), 1.14 (s, 3H).  $^{13}\text{C NMR}$  (101 MHz,  $\text{CDCl}_3$ )  $\delta$  154.71, 136.16, 133.97, 130.30, 129.70, 129.66, 128.95, 120.74, 118.47, 113.38, 74.15, 59.29, 36.08, 29.77, 23.24. **HRMS (ESI)** calcd for  $\text{C}_{17}\text{H}_{19}\text{O}_3\text{S}^+$ ,  $[\text{M}+\text{H}]^+$ , 303.1055, found 303.1060.

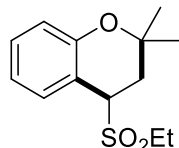

**4-(ethylsulfonyl)-2,2-dimethylchromane (61).** White solid was obtained in 63% isolated yield.  $^1\text{H NMR}$  (400 MHz,  $\text{CDCl}_3$ )  $\delta$  7.96–7.87 (m, 1H), 7.27–7.22 (m, 1H), 6.95 (m, 1H), 6.85 (dd,  $J = 8.3, 1.3$  Hz, 1H), 4.40 (dd,  $J = 11.9, 7.6$  Hz, 1H), 2.88–2.74 (m, 1H), 2.74–2.60 (m, 1H), 2.42 (dd,  $J = 14.0, 7.6$  Hz, 1H), 2.16 (dd,  $J = 14.0, 11.9$  Hz, 1H), 1.51 (s, 3H), 1.29 (t,  $J = 7.5$  Hz, 3H), 1.22 (s, 3H).  $^{13}\text{C NMR}$  (101 MHz,  $\text{CDCl}_3$ )  $\delta$  154.45, 130.38, 129.08, 121.18, 118.76, 113.42, 74.47, 58.01, 41.81, 36.19, 29.89, 23.03, 5.13. **HRMS (ESI)** calcd for  $\text{C}_{13}\text{H}_{19}\text{O}_3\text{S}^+$ ,  $[\text{M}+\text{H}]^+$ , 255.1049, found 255.1044.

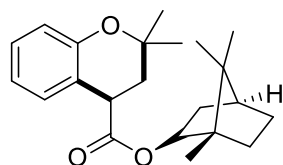

**1,7,7-trimethylbicyclo[2.2.1]heptan-2-yl (R)-2,2-dimethylchromane-4-carboxylate (62).** Faint yellow liquid was obtained in 63% isolated yield.  $^1\text{H NMR}$  (400 MHz,  $\text{CDCl}_3$ )  $\delta$  7.14 (q,  $J = 7.9, 7.1$  Hz, 2H), 6.85 (m, 1H), 6.79 (d,  $J = 8.2$  Hz, 1H), 4.72 (m, 1H), 3.81 (dd,  $J = 10.1, 6.6$  Hz, 1H), 2.20 (m, 1H), 2.03 (dd,  $J = 13.6, 6.5$  Hz, 1H), 1.84 (m, 1H), 1.71 (m, 3H), 1.55 (m, 1H), 1.39 (d,  $J = 6.5$  Hz, 3H), 1.28 (d,  $J = 4.5$  Hz, 3H), 1.21–1.03 (m, 2H), 0.86 (d,  $J = 3.9$  Hz, 3H), 0.81 (dd,  $J = 8.6, 6.8$  Hz, 6H).  $^{13}\text{C NMR}$  (101 MHz,  $\text{CDCl}_3$ )  $\delta$  173.41, 173.29, 153.46, 129.50, 129.05, 128.58, 120.09, 120.00, 118.03, 117.99, 117.83, 117.76, 82.09, 81.93, 73.71, 48.98, 48.78, 47.04, 45.12, 40.35, 40.16, 38.89, 36.52, 36.34, 33.91, 33.89, 28.86, 28.62, 27.13, 25.32, 25.07, 20.21, 20.19, 20.00, 19.93, 11.79, 11.70. **HRMS (ESI)** calcd for  $\text{C}_{22}\text{H}_{31}\text{O}_3^+$ ,  $[\text{M}+\text{H}]^+$ , 342.2268, found 342.2269.

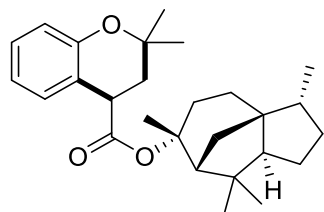

**3,6,8,8-tetramethyloctahydro-1H-3a,7-methanoazulen-6-yl (R)-2,2-dimethylchromane-4-carboxylate (63).** Faint yellow liquid was obtained in 59% isolated yield.  $^1\text{H NMR}$  (400 MHz,  $\text{CDCl}_3$ )  $\delta$  7.28–7.20 (m, 1H), 7.17 (t,  $J = 7.7$  Hz, 1H), 6.89 (m, 1H), 6.82 (d,  $J = 8.2$  Hz, 1H), 3.75 (m, 1H), 2.43 (t,  $J = 4.8$  Hz, 1H), 2.33–2.12 (m, 3H), 2.12–1.97 (m, 2H), 1.97–1.78 (m, 3H), 1.70 (m, 3H), 1.61 (d,  $J = 11.2$  Hz, 3H), 1.50–1.40 (m, 7H), 1.30 (d,  $J = 5.8$  Hz, 3H), 1.17 (d,  $J = 21.3$  Hz, 3H), 1.02 (d,  $J = 10.2$

Hz, 3H), 0.88 (dd,  $J = 7.1, 4.9$  Hz, 3H).  $^{13}\text{C NMR}$  (101 MHz,  $\text{CDCl}_3$ )  $\delta$  172.68, 172.62, 153.61, 153.55, 129.03, 128.83, 128.47, 128.44, 120.08, 119.97, 118.51, 118.34, 117.83, 117.79, 87.88, 87.65, 73.70, 73.67, 57.71, 57.31, 56.78, 56.74, 54.05, 54.02, 43.57, 43.55, 41.41, 41.15, 40.58, 37.06, 36.29, 36.17, 33.28, 32.91, 31.40, 29.23, 28.90, 28.71, 28.64, 27.49, 27.46, 25.80, 25.53, 25.41, 25.17, 24.79, 15.65. **HRMS (ESI)** calcd for  $\text{C}_{27}\text{H}_{38}\text{O}_3\text{Na}^+$ ,  $[\text{M}+\text{H}]^+$ , 433.2713, found 433.2713.

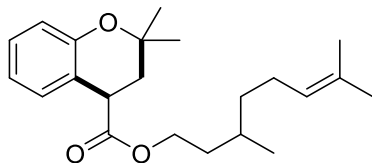

**3,7-dimethyloct-6-en-1-yl -2,2-dimethylchromane-4-carboxylate (64).** Faint yellow liquid was obtained in 70% isolated yield.  $^1\text{H NMR}$  (400 MHz,  $\text{CDCl}_3$ )  $\delta$  7.14 (t,  $J = 7.2$  Hz, 2H), 6.85 (t,  $J = 7.5$  Hz, 1H), 6.80 (d,  $J = 8.2$  Hz, 1H), 5.08 (t,  $J = 7.2$  Hz, 1H), 4.21 (q,  $J = 6.6, 6.1$  Hz, 2H), 3.85 (dd,  $J = 10.5, 6.4$  Hz, 1H), 3.20 (dd,  $J = 8.7, 4.8$  Hz, 1H), 2.23 (dd,  $J = 13.6, 10.5$  Hz, 1H), 2.03 (dd,  $J = 13.7, 6.4$  Hz, 1H), 1.92 (dd,  $J = 10.7, 5.0$  Hz, 2H), 1.73 (dd,  $J = 9.1, 4.7$  Hz, 2H), 1.68 (s, 3H), 1.60 (s, 3H), 1.40 (s, 3H), 1.35–1.29 (m, 3H), 1.27 (s, 3H), 0.91 (d,  $J = 6.5$  Hz, 3H).  $^{13}\text{C NMR}$  (101 MHz,  $\text{CDCl}_3$ )  $\delta$  173.90, 153.50, 131.47, 128.89, 128.87, 128.65, 124.59, 120.12, 117.95, 117.88, 73.69, 63.79, 55.85, 39.90, 37.04, 36.29, 35.54, 35.03, 29.55, 28.82, 25.84, 25.56, 25.49, 25.04, 24.80, 19.47, 17.77. **HRMS (ESI)** calcd for  $\text{C}_{22}\text{H}_{33}\text{O}_3^+$ ,  $[\text{M}+\text{H}]^+$ , 345.2424, found 345.2426.

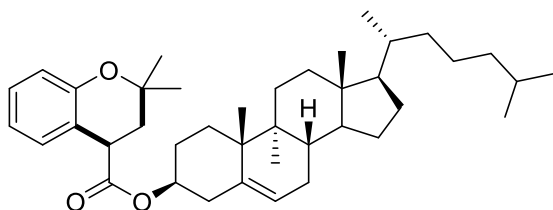

**9,10,13-trimethyl-17-(6-methylheptan-2-yl) 2,3,4,7,8,9,10,11,12,13,14,15,16,17-tetradecahydro-1H-cyclopenta[a]phenanthren-3-yl-2,2-dimethylchromane-4-carboxylate (65).** White solid was obtained in 59% isolated yield.  $^1\text{H NMR}$  (400 MHz,  $\text{CDCl}_3$ )  $\delta$  7.20–7.10 (m, 2H), 6.86 (t,  $J = 7.5$  Hz, 1H), 6.80 (d,  $J = 8.2$  Hz, 1H), 5.40 (d,  $J = 4.5$  Hz, 1H), 4.73 (m, 1H), 3.82 (dd,  $J = 10.6, 6.3$  Hz, 1H), 2.35 (dd,  $J = 19.4, 7.6$  Hz, 2H), 2.22 (dd,  $J = 13.6, 10.6$  Hz, 1H), 2.11–1.73 (m, 6H), 1.71–0.79 (m, 41H), 0.68 (s, 3H).  $^{13}\text{C NMR}$  (101 MHz,  $\text{CDCl}_3$ )  $\delta$  173.25, 153.53, 139.58, 128.81, 128.62, 122.97, 122.95, 120.14, 118.14, 117.87, 74.85, 73.73, 56.80, 56.25, 50.12, 42.43, 39.98, 39.84, 39.65, 38.23, 38.08, 37.10, 37.06, 36.73, 36.31, 35.93, 32.04, 31.97, 28.93, 28.37, 28.15, 27.94, 27.77, 25.09, 24.42, 23.96, 22.97, 22.71, 21.16, 19.48, 18.85, 11.99. **HRMS (ESI)** calcd for  $\text{C}_{39}\text{H}_{59}\text{O}_3^+$ ,  $[\text{M}+\text{H}]^+$ , 574.4459, found 574.4453.

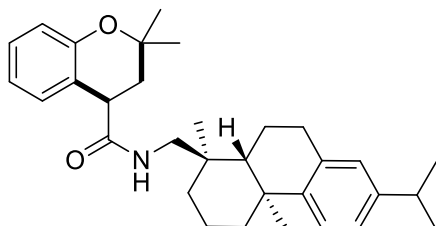

***N*-7-isopropyl-1,4a-dimethyl-1,2,3,4,4a,9,10,10a-octahydrophenanthren-1-yl)methyl)-2,2-dimethylchromane-4-carboxamide (66).** Faint yellow liquid was obtained in 56% isolated yield. <sup>1</sup>H NMR (400 MHz, CDCl<sub>3</sub>) δ 7.20 (d, *J* = 8.2 Hz, 1H), 7.14–6.98 (m, 3H), 6.93–6.86 (m, 1H), 6.84 (d, *J* = 8.1 Hz, 1H), 6.58 (t, *J* = 7.4 Hz, 1H), 5.71–5.60 (m, 1H), 3.83–3.66 (m, 1H), 3.42 (dd, *J* = 13.6, 8.0 Hz, 1H), 2.95 (dd, *J* = 13.6, 4.9 Hz, 1H), 2.91–2.81 (m, 2H), 2.60 (m, 1H), 2.33 (d, *J* = 12.4 Hz, 1H), 2.21 (dd, *J* = 13.6, 9.0 Hz, 1H), 2.16–2.04 (m, 1H), 1.87–1.60 (m, 4H), 1.37 (s, 5H), 1.31–1.25 (m, 10H), 1.24 (s, 4H), 0.95 (s, 3H). <sup>13</sup>C NMR (101 MHz, CDCl<sub>3</sub>) δ 173.94, 154.18, 147.16, 145.71, 134.71, 129.73, 129.14, 126.93, 124.24, 123.90, 120.38, 118.35, 74.50, 50.19, 45.50, 42.19, 38.73, 37.84, 37.50, 37.47, 36.38, 33.61, 30.08, 28.35, 25.57, 25.17, 24.25, 24.10, 18.98, 18.68. **HRMS (ESI)** calcd for C<sub>32</sub>H<sub>44</sub>NO<sub>2</sub><sup>+</sup>, [M+H]<sup>+</sup>, 474.3367, found 474.3372.

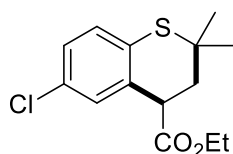

**Ethyl-6-chloro-2,2-dimethylthiochromane-4-carboxylate (67).** Faint yellow liquid was obtained in 31% isolated yield. <sup>1</sup>H NMR (400 MHz, CDCl<sub>3</sub>) δ 7.16 (d, *J* = 2.3 Hz, 1H), 7.10 (dd, *J* = 8.4, 2.3 Hz, 1H), 7.03 (d, *J* = 8.4 Hz, 1H), 4.26 (m, 2H), 3.90 (dd, *J* = 11.1, 5.6 Hz, 1H), 2.31 (dd, *J* = 13.6, 11.0 Hz, 1H), 2.13 (dd, *J* = 13.6, 5.6 Hz, 1H), 1.43 (s, 3H), 1.39 (s, 3H), 1.31 (t, *J* = 7.1 Hz, 3H). <sup>13</sup>C NMR (101 MHz, CDCl<sub>3</sub>) δ 173.76, 132.50, 131.34, 129.95, 129.04, 128.82, 127.67, 61.53, 44.49, 41.82, 41.30, 30.73, 29.12, 14.32. **HRMS (ESI)** calcd for C<sub>14</sub>H<sub>17</sub>O<sub>2</sub>ClS<sup>+</sup>, [M+H]<sup>+</sup>, 284.0638, found 284.0640.

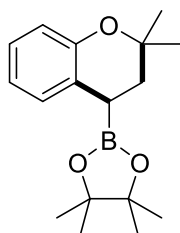

**2-(2,2-dimethylchroman-4-yl)-4,4,5,5-tetramethyl-1,3,2-dioxaborolane (68).** White liquid was obtained in 48% isolated yield. <sup>1</sup>H NMR (400 MHz, Chloroform-*d*) δ 7.18 (m, *J* = 7.7, 1.5 Hz, 1H), 7.05 (m, *J* = 7.1, 1.3 Hz, 1H), 6.81 (m, *J* = 7.5, 1.3 Hz, 1H), 6.76 (m, *J* = 8.2, 1.3 Hz, 1H), 2.61 (m, *J* = 10.6, 6.8 Hz, 1H), 2.00–1.80 (m, 2H), 1.38 (s, 3H), 1.27 (d, *J* = 4.1 Hz, 12H), 1.24 (s, 3H). <sup>13</sup>C NMR (101 MHz, CDCl<sub>3</sub>) δ 153.68, 129.71, 126.83, 121.73, 119.74, 117.65, 83.77, 73.41, 34.99, 28.91, 24.94, 24.92, 24.86. **HRMS (ESI)** calcd for C<sub>17</sub>H<sub>26</sub>O<sub>3</sub>B<sup>+</sup>, [M+H]<sup>+</sup>, 289.1975, found 289.1980.

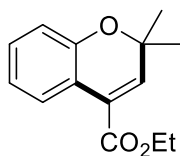

**Ethyl 2,2-dimethyl-2*H*-chromene-4-carboxylate (69).** Faint yellow liquid was obtained in 55% isolated yield. <sup>1</sup>H NMR (400 MHz, CDCl<sub>3</sub>) δ 7.29 (d, *J* = 7.7 Hz, 1H), 7.12 (t, *J* = 7.8 Hz, 1H), 6.94–6.84 (m, 1H), 6.81 (d, *J* = 8.3 Hz, 1H), 4.10–3.85 (m, 2H), 3.06 (d, *J* = 5.7 Hz, 1H), 2.03–1.73 (m, 3H), 1.45 (s, 3H), 1.25 (s, 3H). <sup>13</sup>C NMR (101 MHz, CDCl<sub>3</sub>) δ 154.69, 128.07, 126.80, 121.40, 120.26,



118.02, 74.35, 65.71, 37.05, 34.29, 30.14, 24.28, 1.16. **HRMS (ESI)** calcd for  $C_{14}H_{17}O_3^+$ ,  $[M+H]^+$ , 233.1178, found 233.1180.

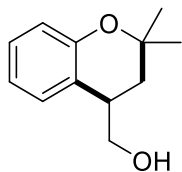

**2,2-dimethylchroman-4-ylmethanol (70)**. Faint yellow liquid was obtained in 94% isolated yield.  **$^1H$  NMR** (400 MHz,  $CDCl_3$ )  $\delta$  7.32–7.24 (m, 1H), 7.17–7.09 (m, 1H), 6.93–6.84 (m, 1H), 6.84–6.76 (m, 1H), 3.97 (m,  $J = 10.8, 4.9$  Hz, 2H), 3.06 (m,  $J = 11.7, 5.7$  Hz, 1H), 1.95 (m,  $J = 13.5, 6.4$  Hz, 1H), 1.83 (t,  $J = 12.7$  Hz, 1H), 1.45 (s, 3H), 1.25 (s, 3H).  **$^{13}C$  NMR** (101 MHz,  $CDCl_3$ )  $\delta$  154.69, 128.07, 126.80, 121.40, 120.26, 118.02, 77.48, 77.16, 76.84, 74.35, 65.72, 37.05, 34.30, 30.14, 24.29, 1.17. **HRMS (ESI)** calcd for  $C_{12}H_{17}O_2^+$ ,  $[M+H]^+$ , 193.1223, found 193.1217.

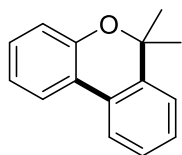

**6,6-dimethyl-6H-benzo[*c*]chromene (71)**. Faint yellow liquid was obtained in 91% isolated yield.  **$^1H$  NMR** (400 MHz,  $CDCl_3$ )  $\delta$  8.31–8.19 (m, 1H), 7.82–7.72 (m, 1H), 7.54–7.43 (m, 2H), 7.38 (d,  $J = 8.5$  Hz, 1H), 7.27 (d,  $J = 8.5$  Hz, 1H), 4.29 (m, 2H), 4.00 (dd,  $J = 10.0, 6.5$  Hz, 1H), 2.37 (dd,  $J = 13.5, 10.0$  Hz, 1H), 2.18 (dd,  $J = 13.5, 6.5$  Hz, 1H), 1.56 (s, 3H), 1.39 (s, 3H), 1.33 (t,  $J = 7.1$  Hz, 3H).  **$^{13}C$  NMR** (101 MHz,  $CDCl_3$ )  $\delta$  174.18, 148.78, 133.91, 127.44, 126.47, 126.32, 125.85, 125.27, 122.14, 119.48, 111.41, 74.29, 61.29, 40.30, 36.42, 28.71, 25.27, 14.38. **HRMS (ESI)** calcd for  $C_{15}H_{15}O^+$ ,  $[M+H]^+$ , 211.1123, found 211.1112.

These  $^1\text{H}$  NMR and  $^{13}\text{C}$  NMR indicate these products have excellent diastereoselectivity ( $>20:1$  d.r.). We confirm that the product **31** (number after revised manuscript) is shown in the following structure.

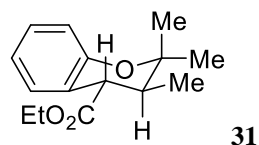

There are two reasons to support above structure.

1) The coupling constant ( $J$ ) of two axial C-H bonds is between 8-13 Hz; The coupling constant ( $J$ ) of two equatorial C-H bonds is between 0-5 Hz; The coupling constant ( $J$ ) of one equatorial C-H bond and one axial C-H bond is between 1-6 Hz (*Williams D H, Fleming I, Spectroscopic Methods in Organic Chemistry, McGraw-Hill, London, 1995, 92-94*). For the product **31**, the coupling constants ( $J$ ) of H are 11.3 Hz (**1**) and 11.0 Hz (**2**), which indicate both C-H (**1, 2**) bonds are axial.

2) When irradiated at the frequency of the proton signal (**1**), a notable NOE enhancement was observed in the H signal (**3, 5**), and a weak NOE enhancement was observed in the H signal (**2**). The result indicate the spatial shift of H (**1**) and H (**3, 5**) is close, and the spatial shift of H (**1**) and H (**2**) is farther than the spatial shift of H (**1**) and H (**3, 5**), which indicate both C-H (**1, 2**) bonds are axial.

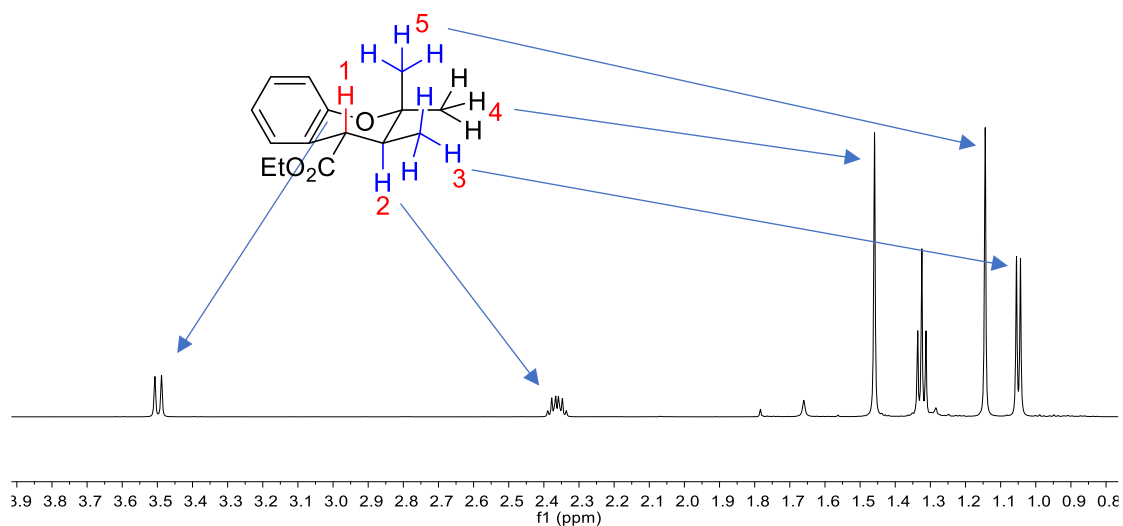

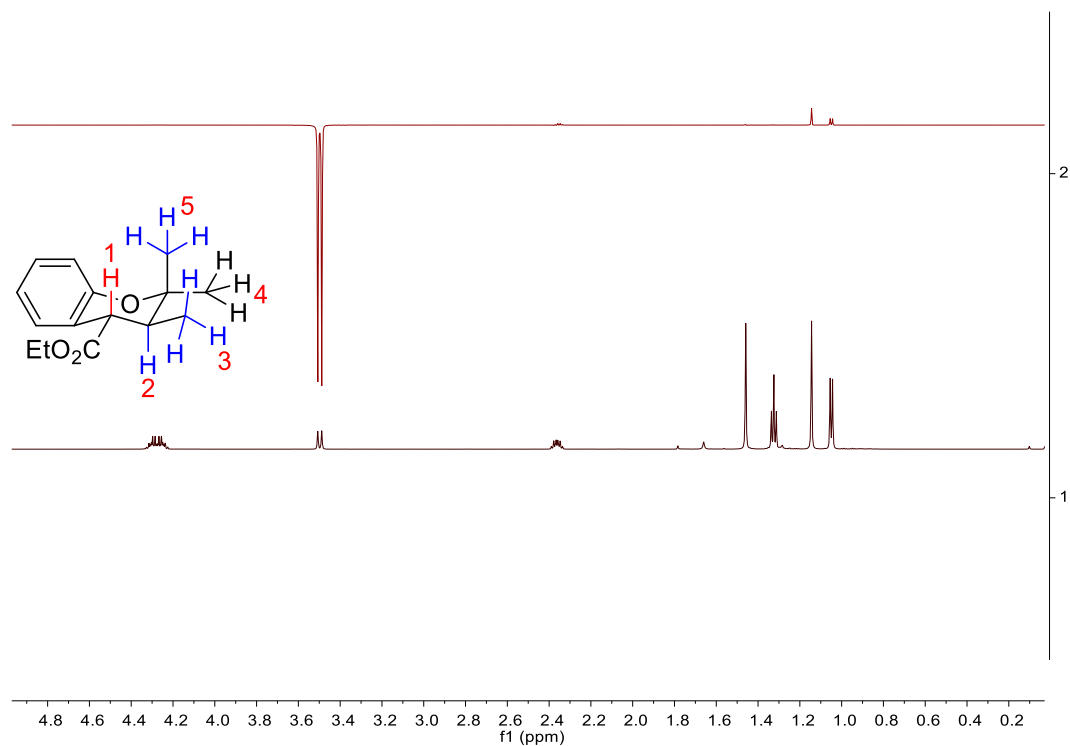

1D NOE spectrum

According to these same reasons, we confirm that the product **32** (number after revised manuscript) is shown in the following structure.

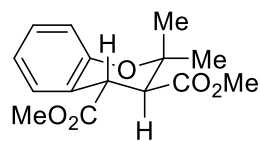

The coupling constants ( $J$ ) of H are 11.9 Hz (1) and 11.8 Hz (2), which indicate these double C-H bonds are axial bonds. The NOE spectrum indicate both C-H (1, 2) bonds are axial.

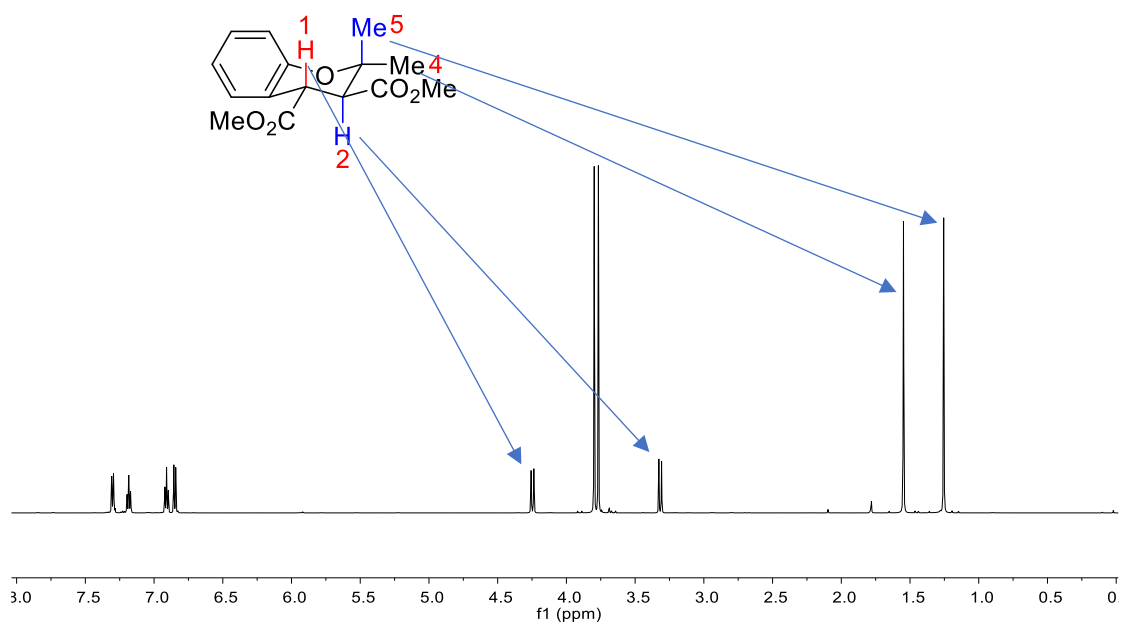

<sup>1</sup>H NMR spectrum

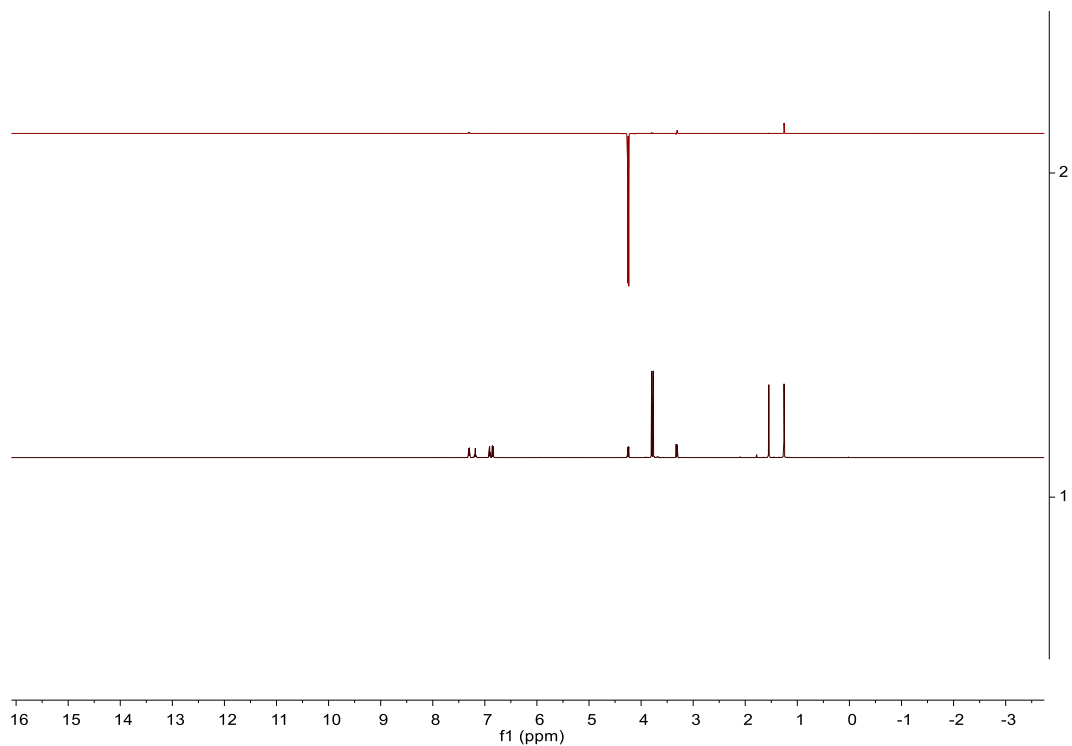

1D NOE spectrum

According to these coupling constants ( $J$ ), the major diastereomers of other products **62-66** is also same as **31** and **32**.

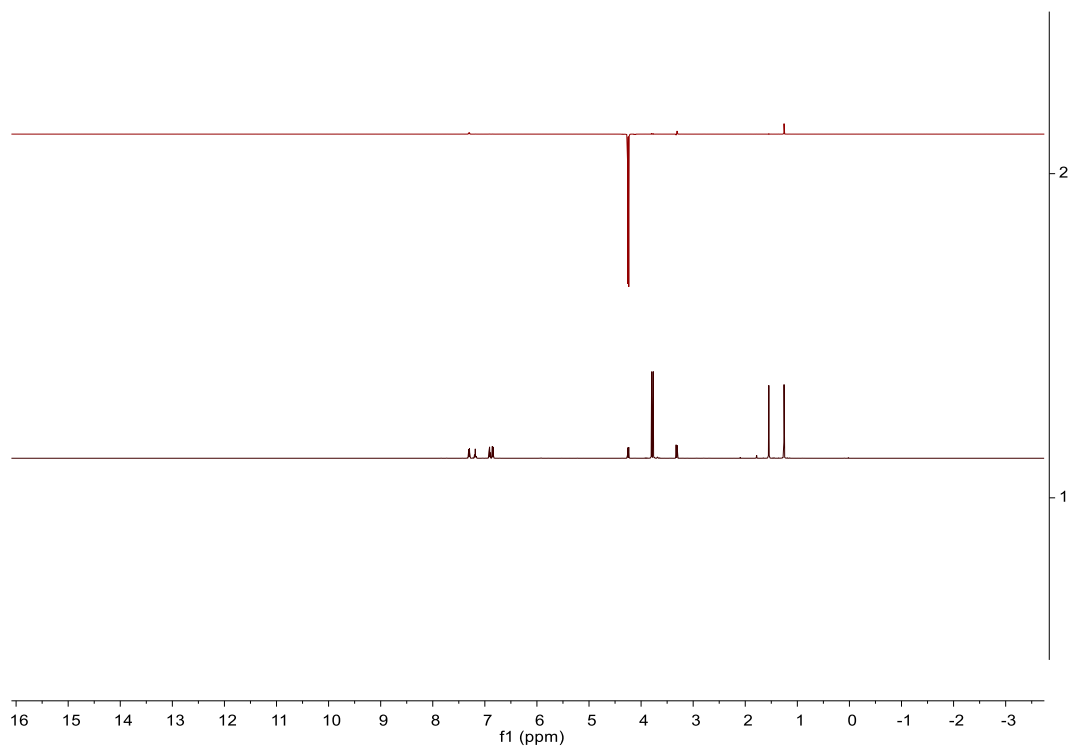

1D NOE spectrum

According to these coupling constants ( $J$ ), the major diastereomers of other products **62-66** is also same as **31** and **32**.

# NMR Spectra of Products

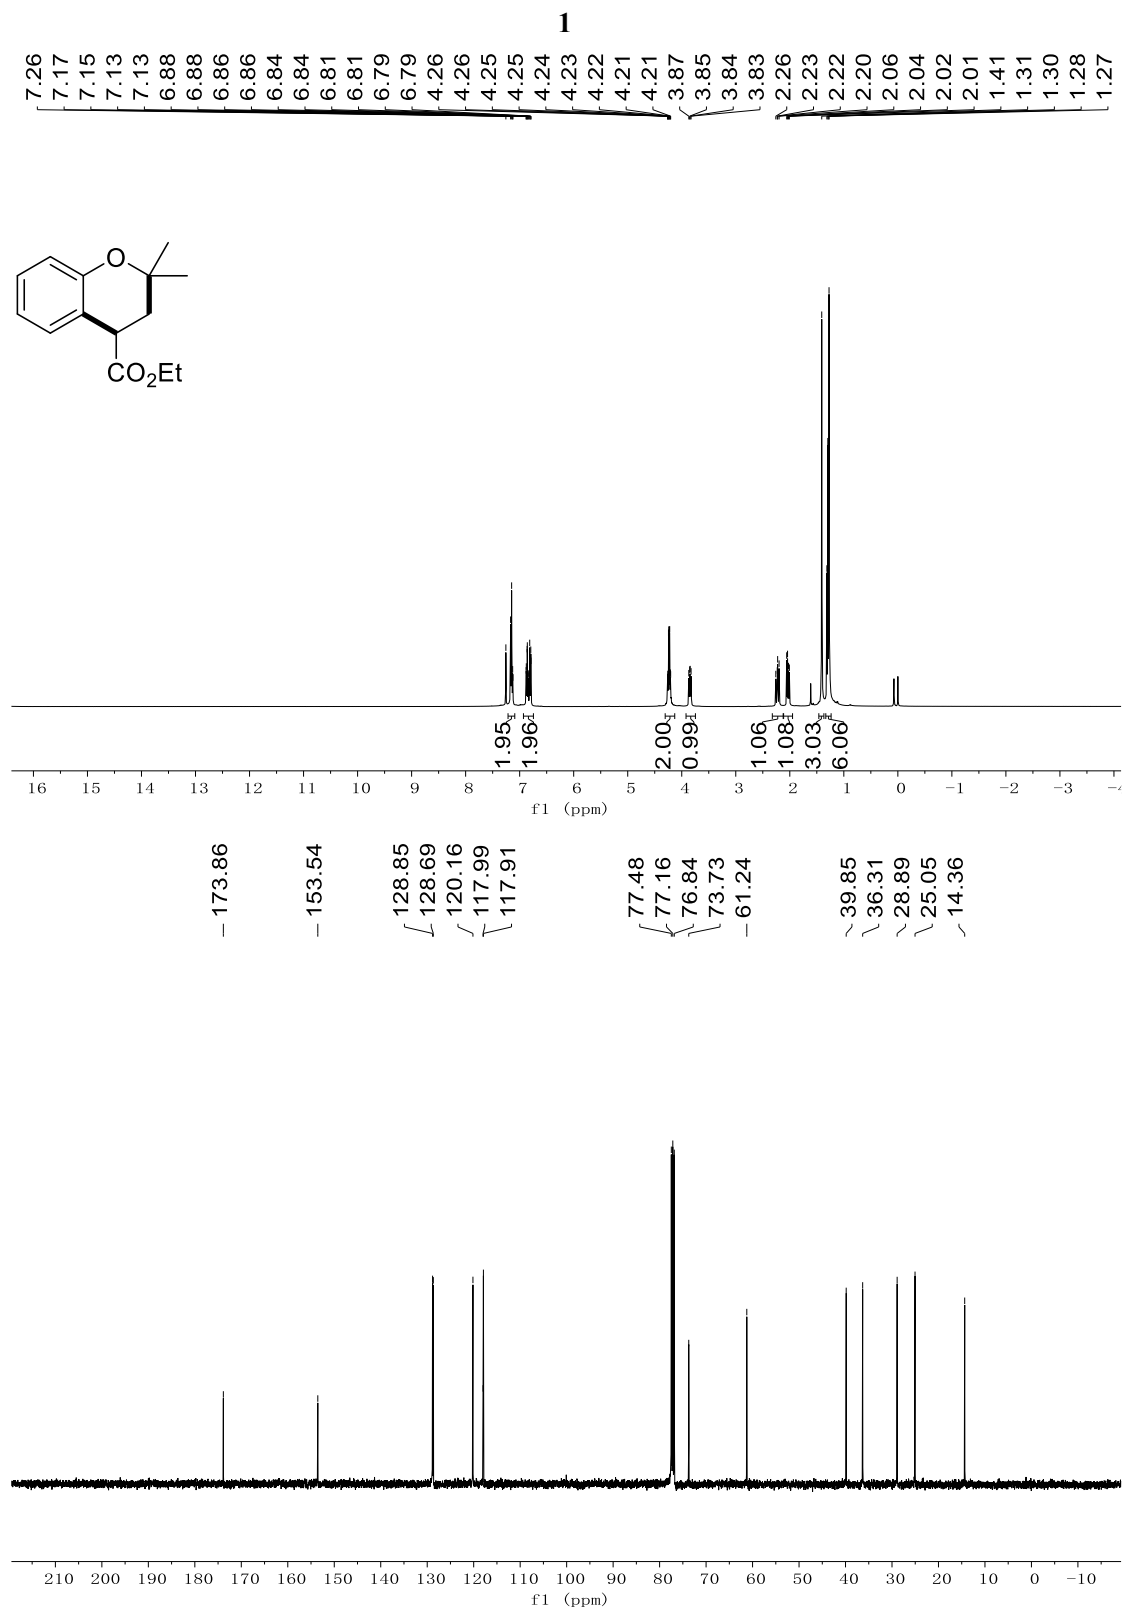

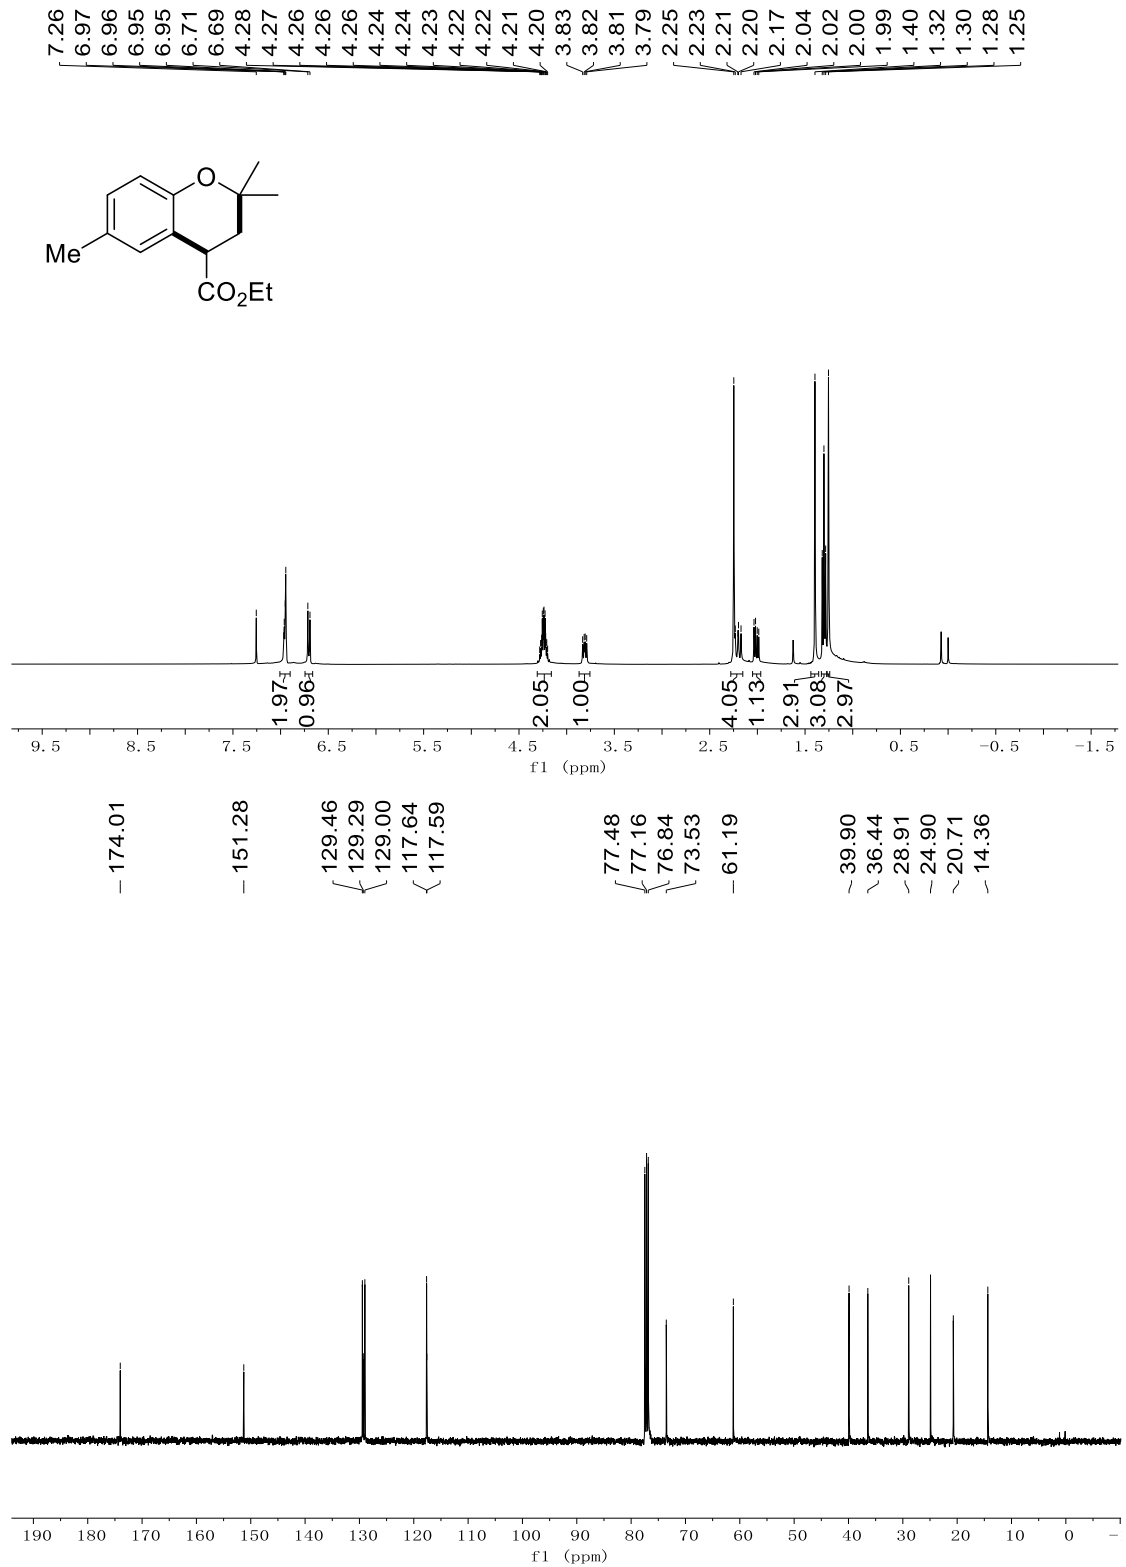

3

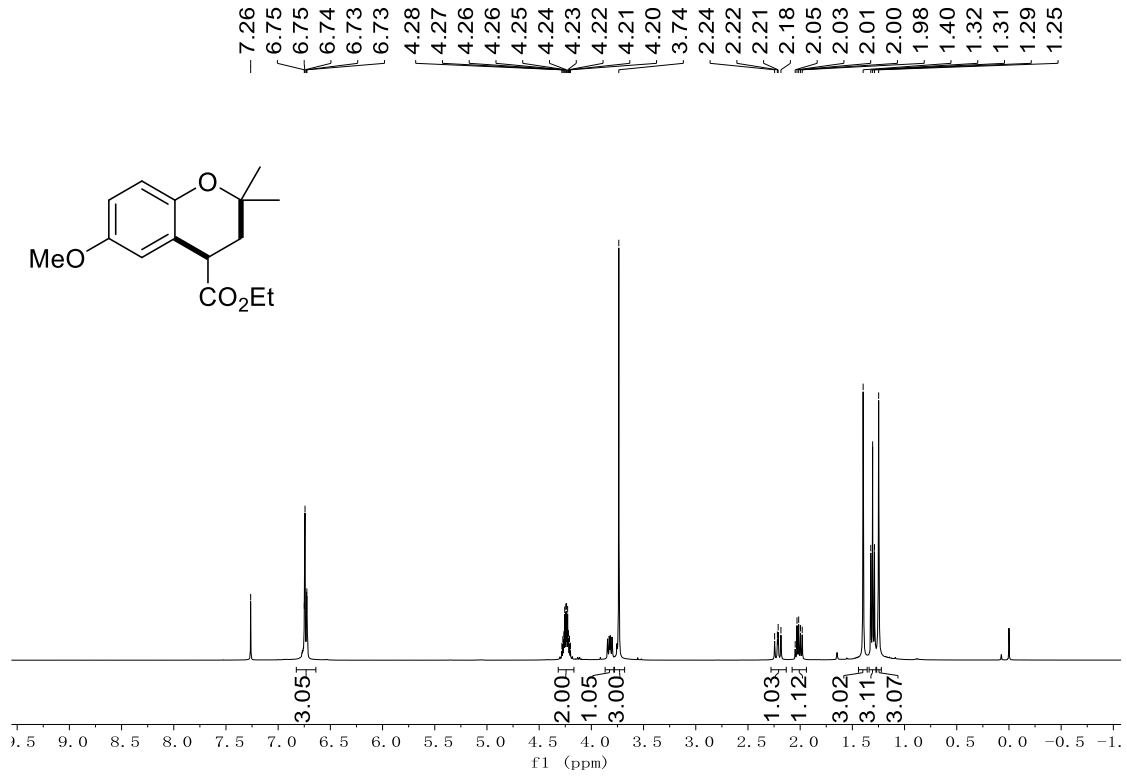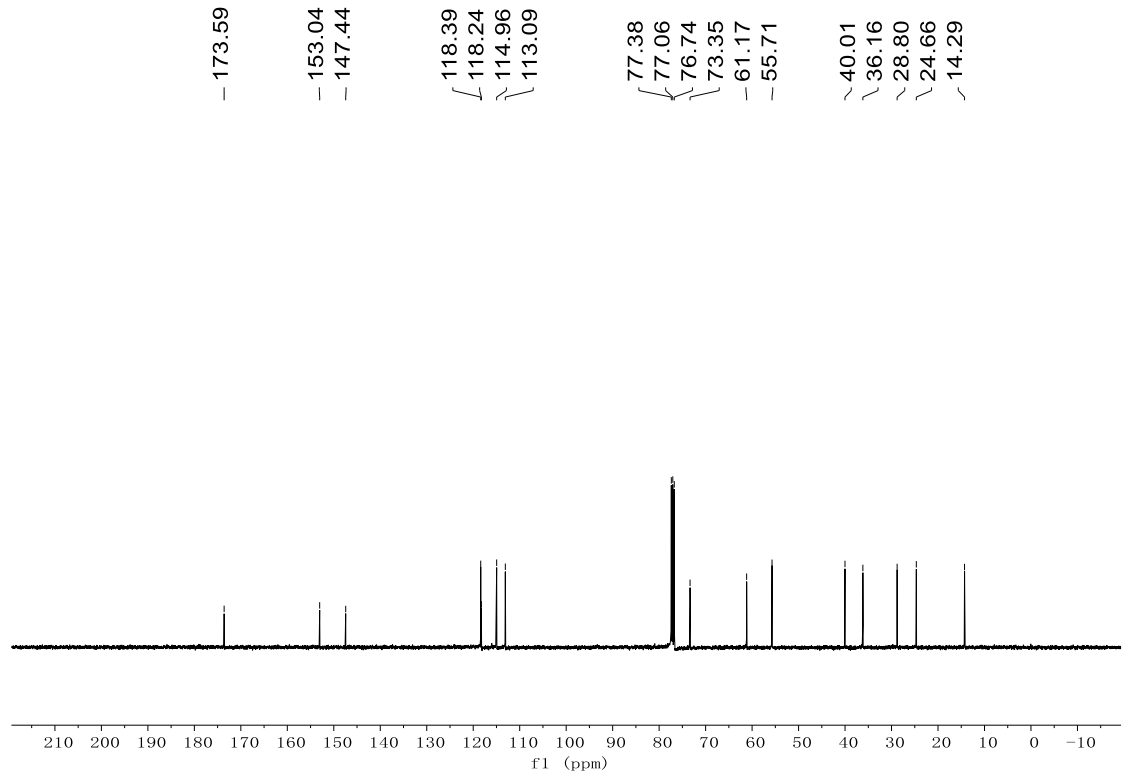



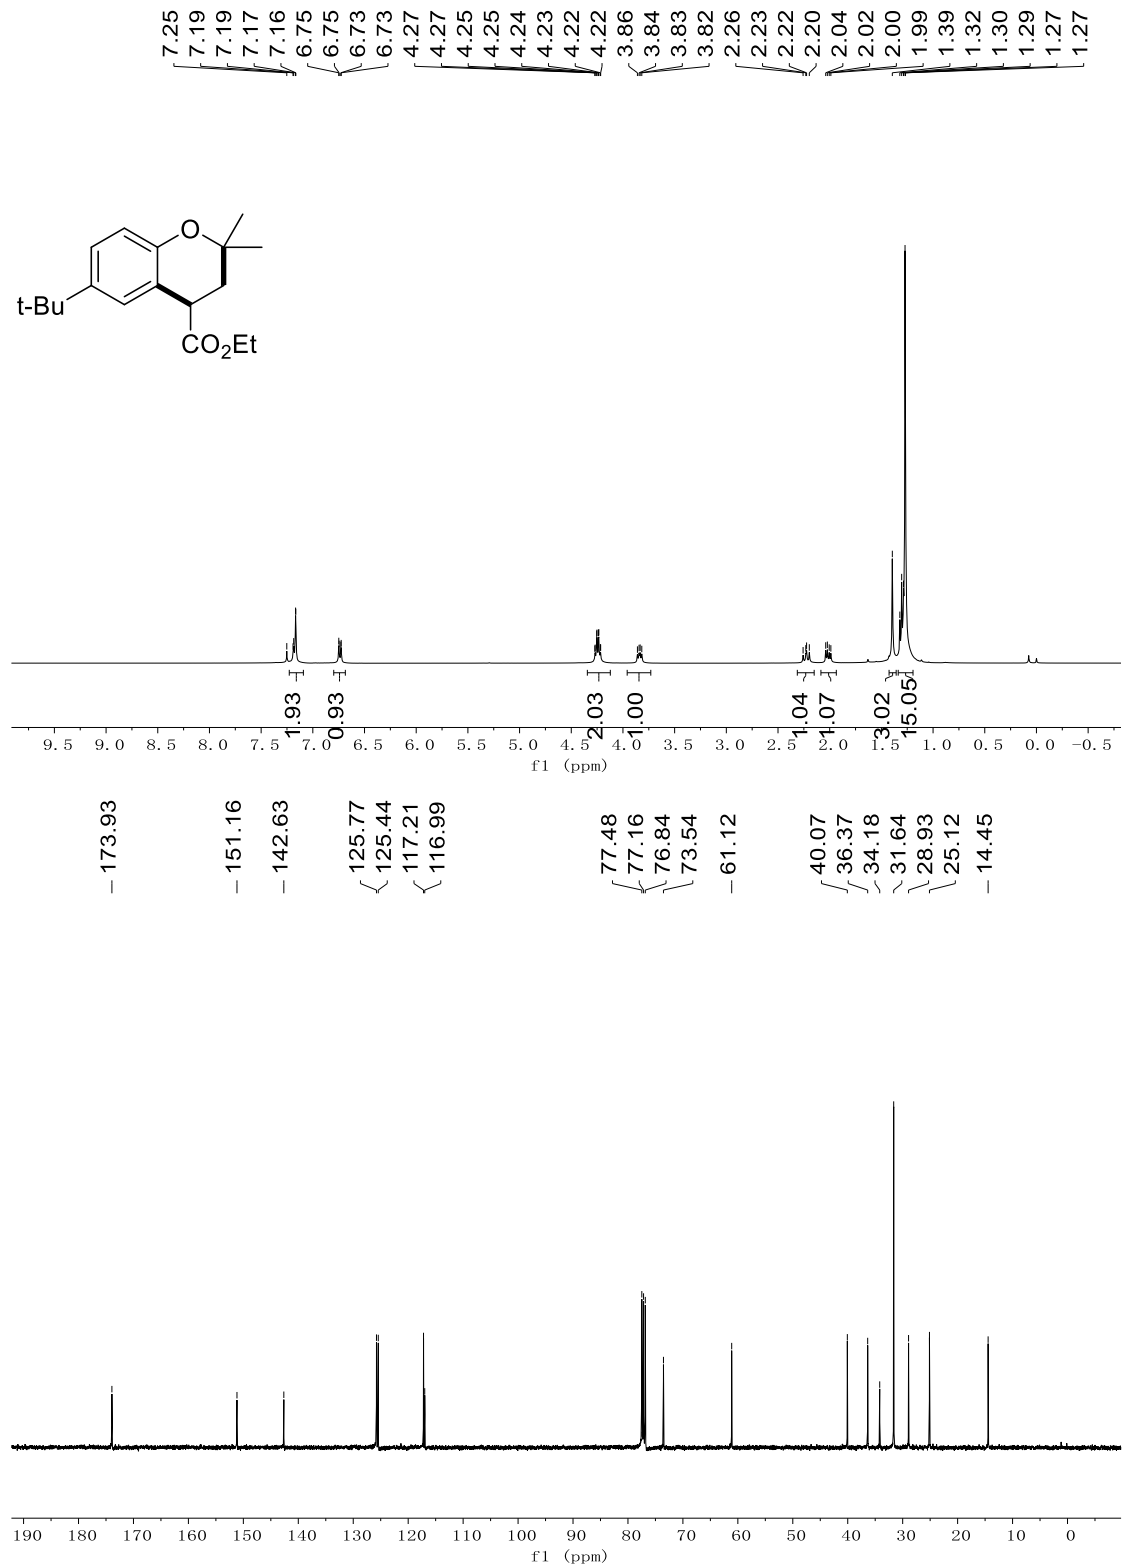

5

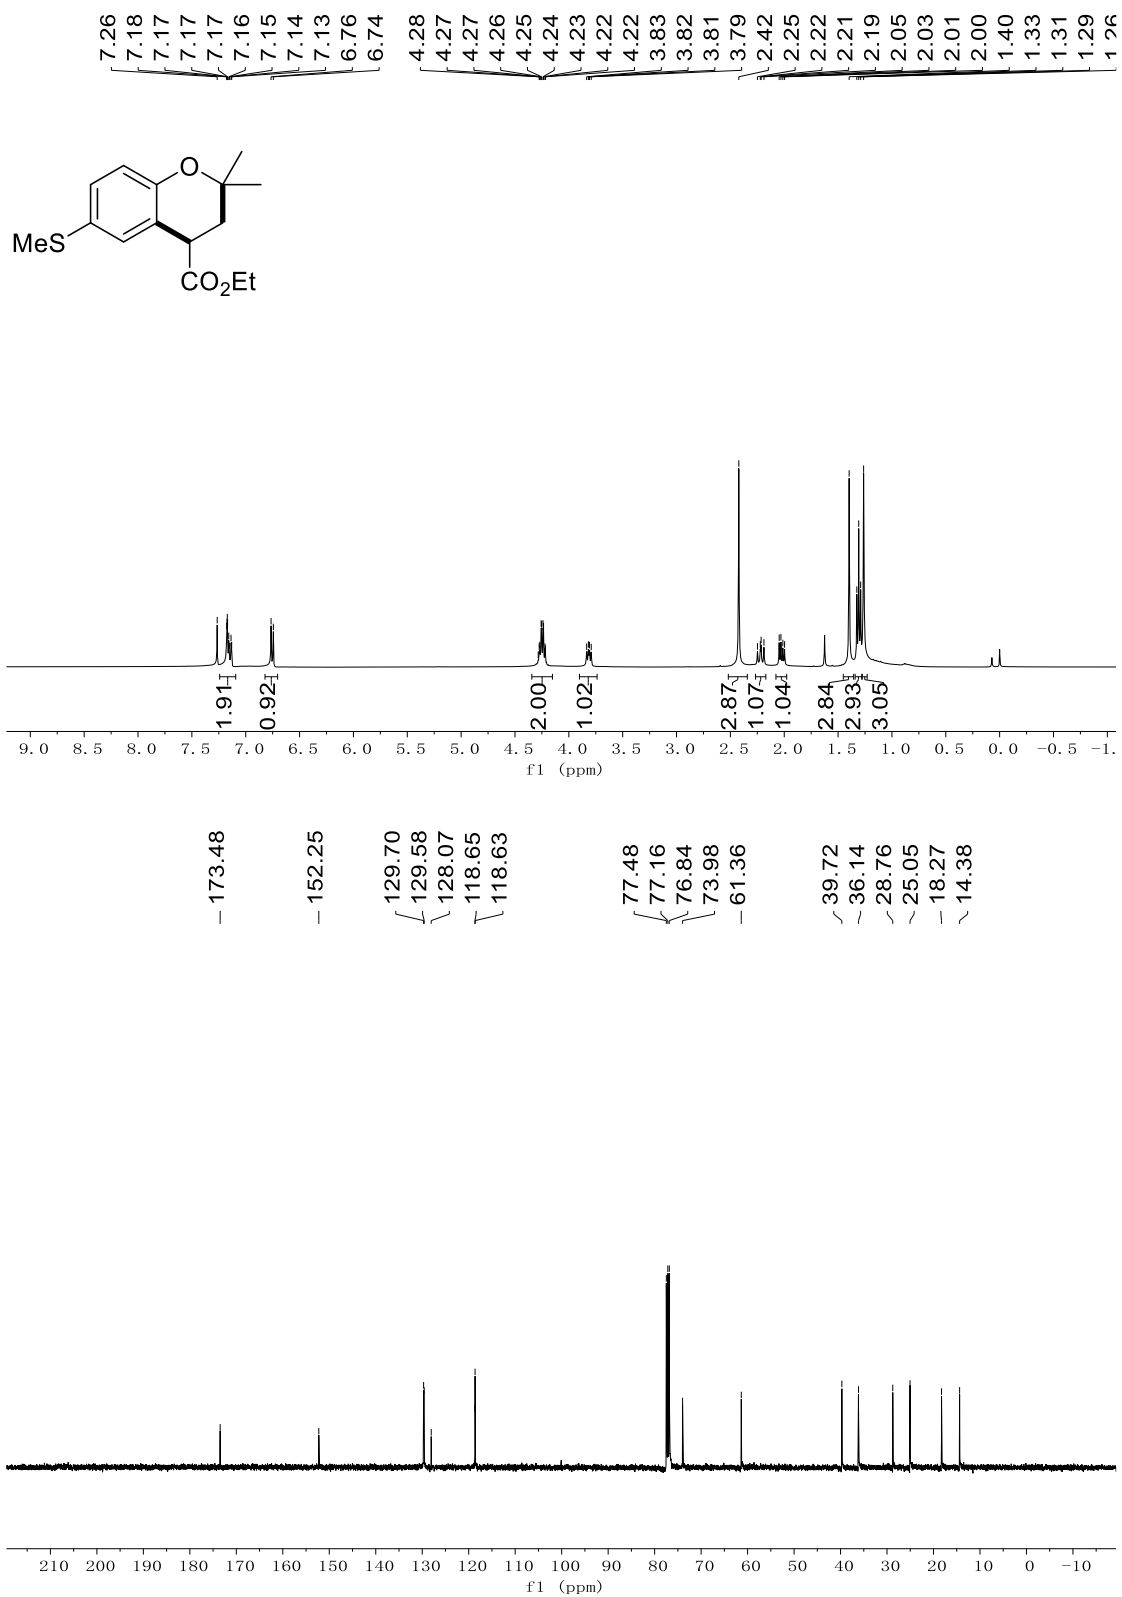

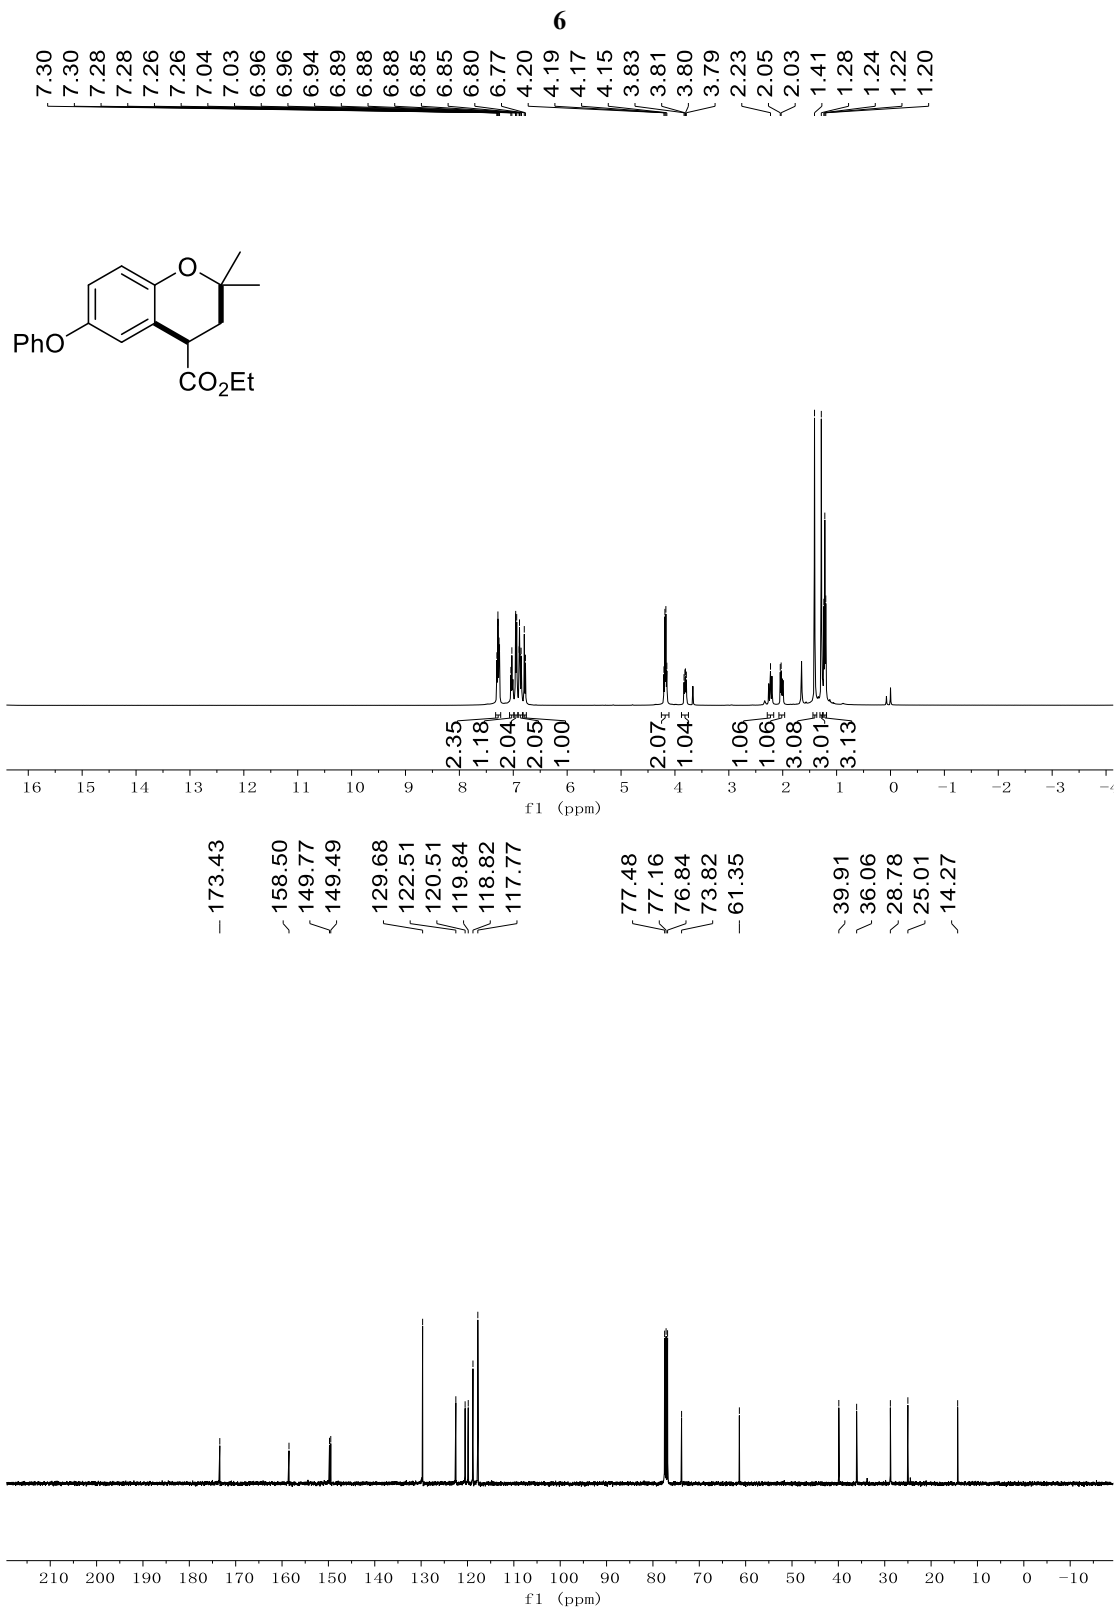

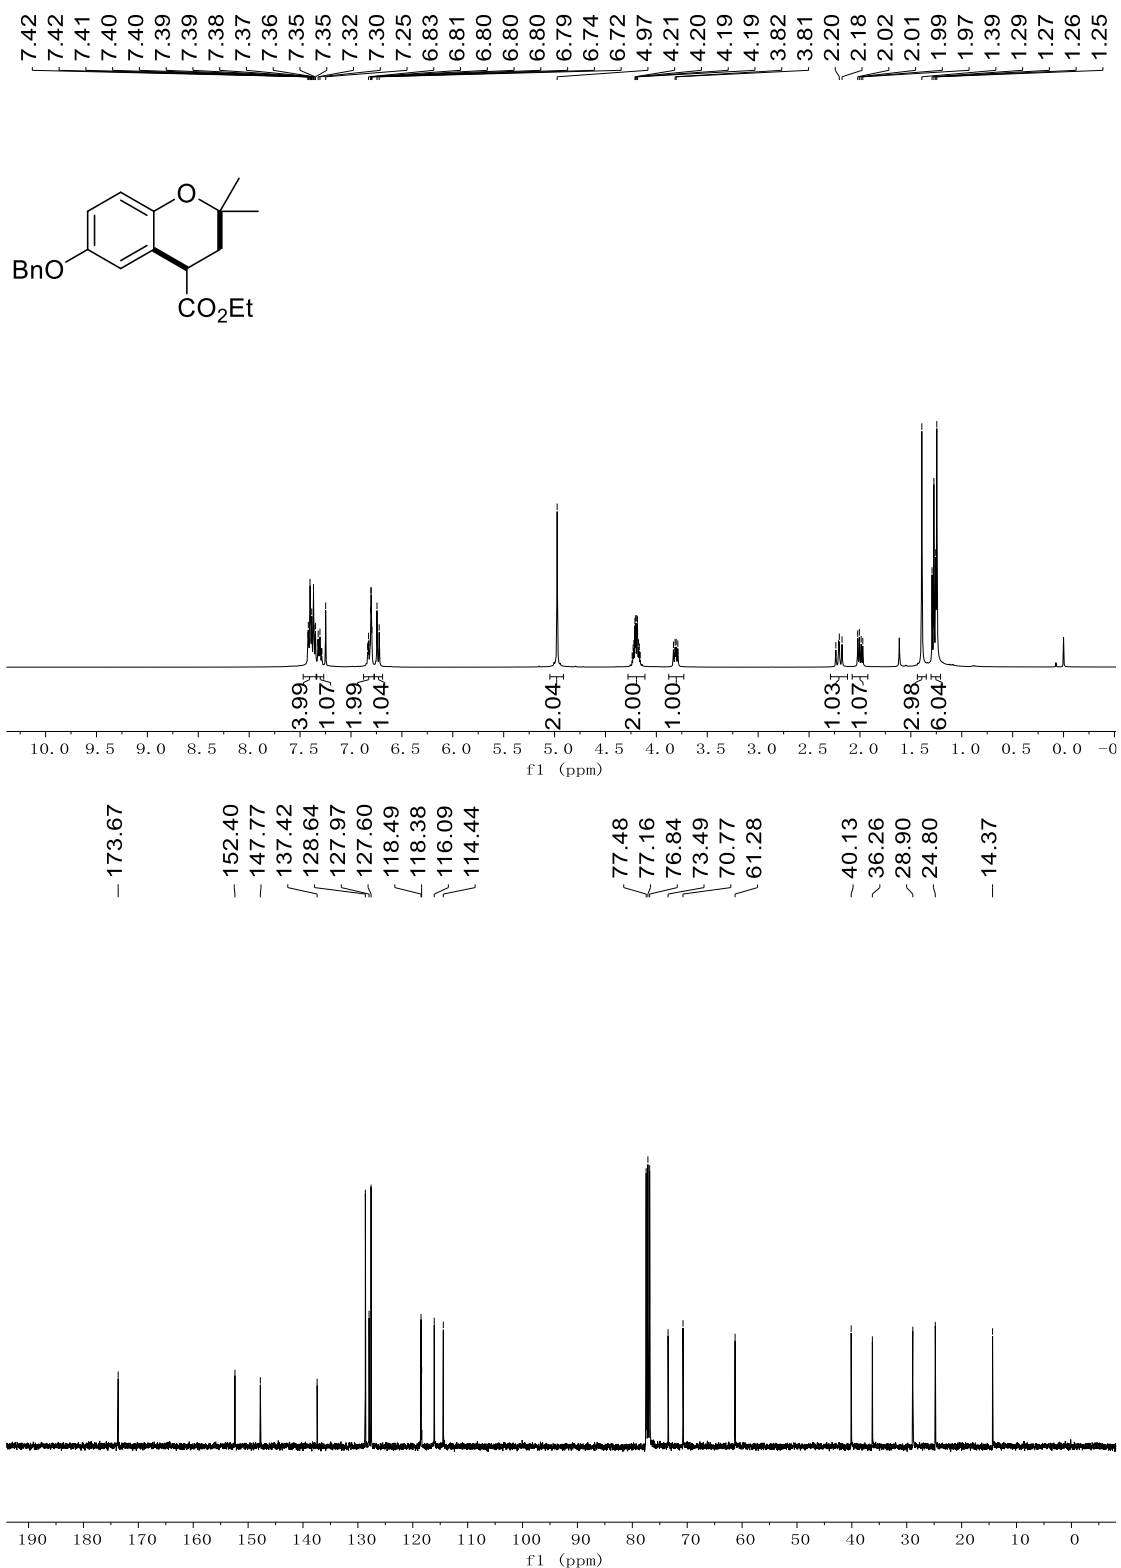

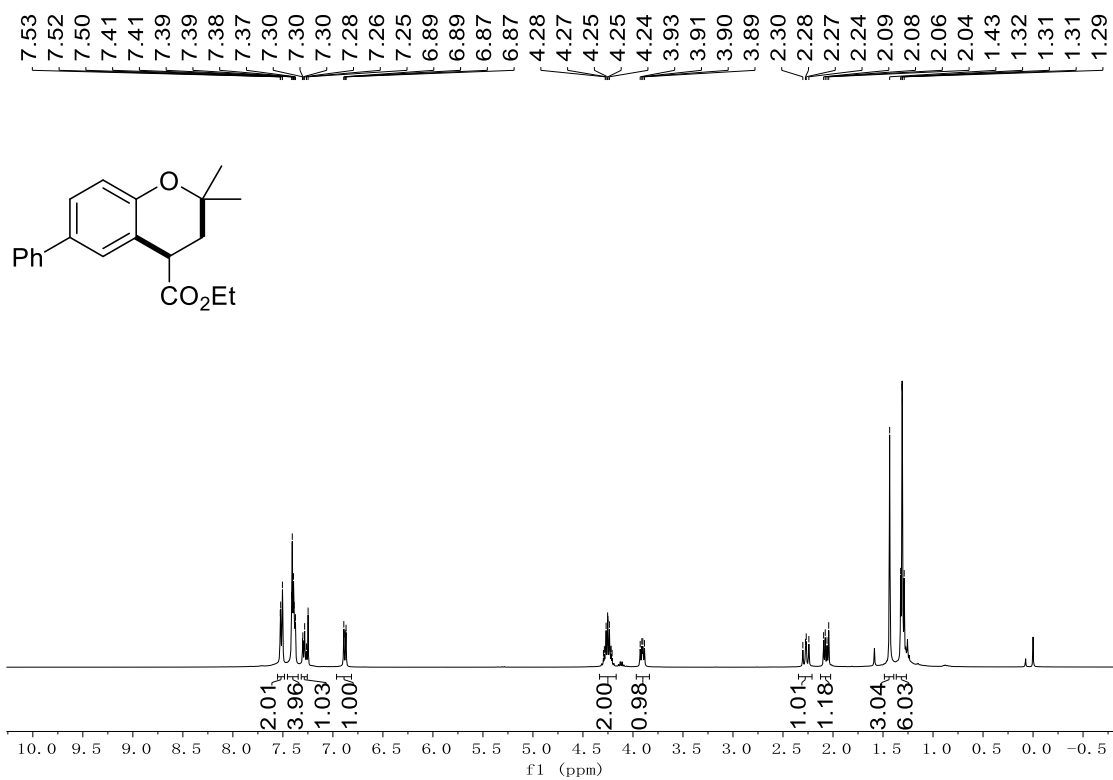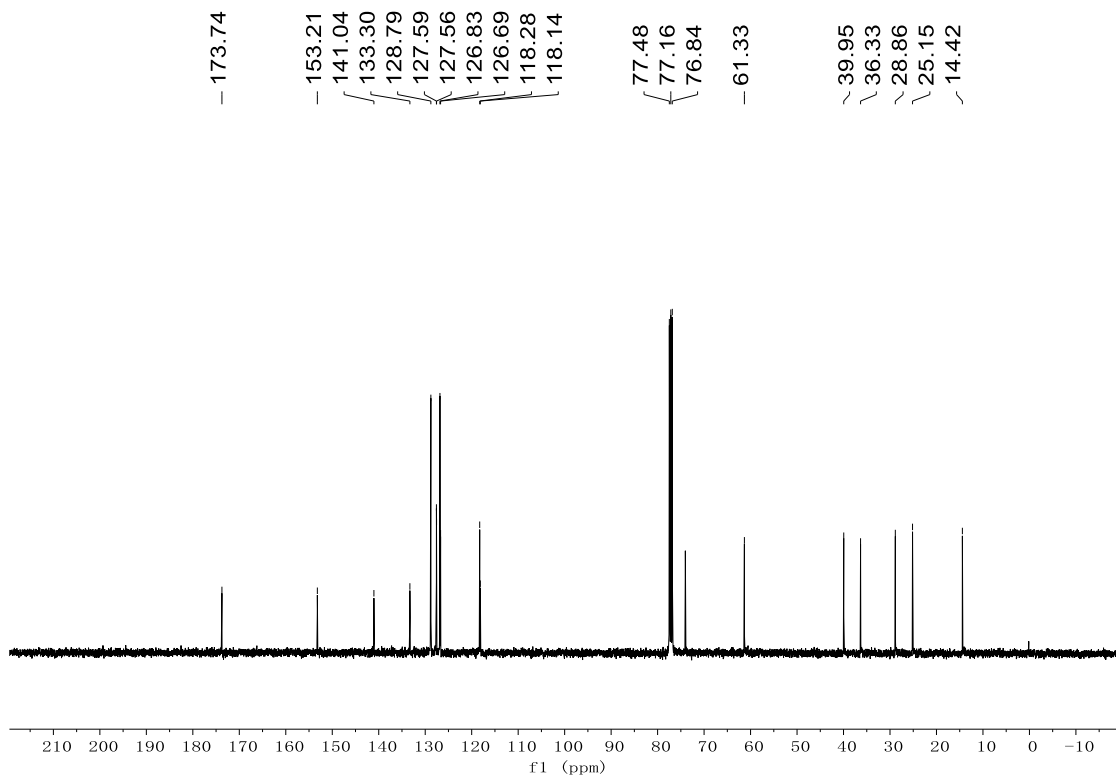

9

7.26  
6.93  
6.92  
6.92  
6.90  
6.90  
6.89  
6.87  
6.87  
6.86  
6.86  
6.76  
6.75  
6.74  
6.72  
4.27  
4.27  
4.26  
4.26  
4.25  
4.24  
4.24  
4.23  
4.22  
3.81  
3.81  
3.80  
2.21  
2.21  
2.18  
2.04  
2.03  
2.01  
1.99  
1.39  
1.33  
1.31  
1.29  
1.26

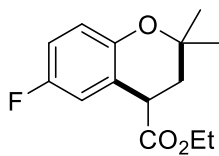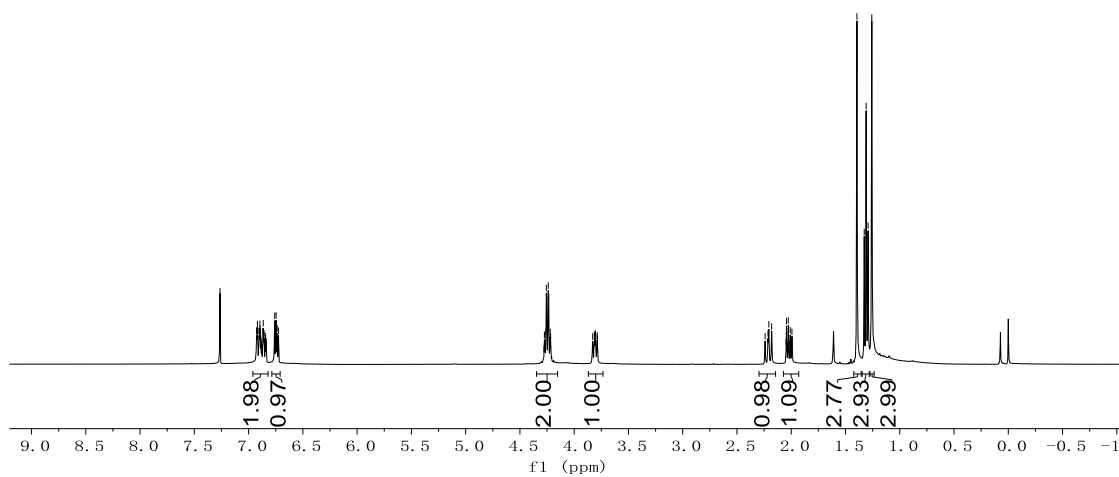

173.25  
157.76  
155.40  
149.64  
149.62  
118.85  
118.82  
118.74  
115.79  
115.56  
114.96  
114.73  
77.48  
77.16  
76.84  
73.88  
61.47  
39.87  
35.94  
28.72  
24.91  
14.34

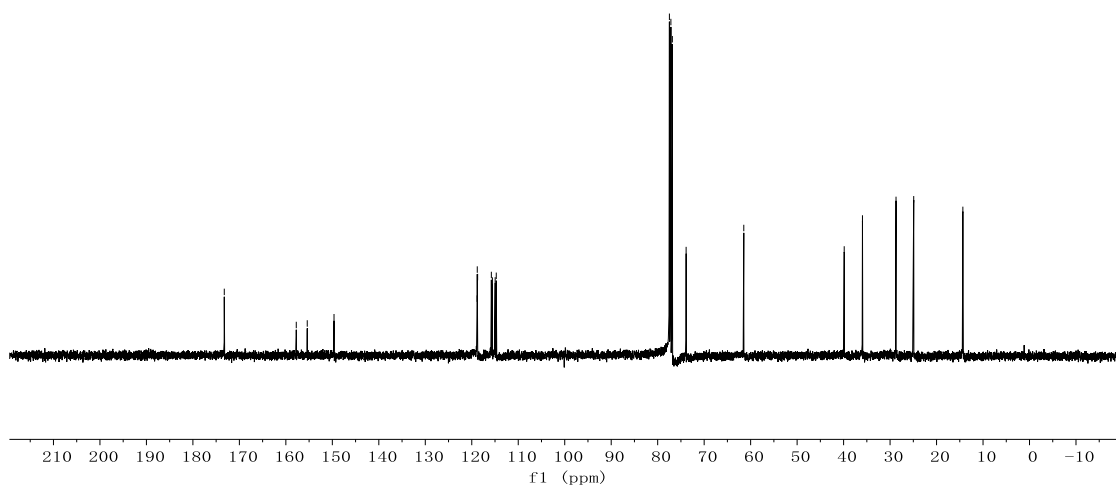

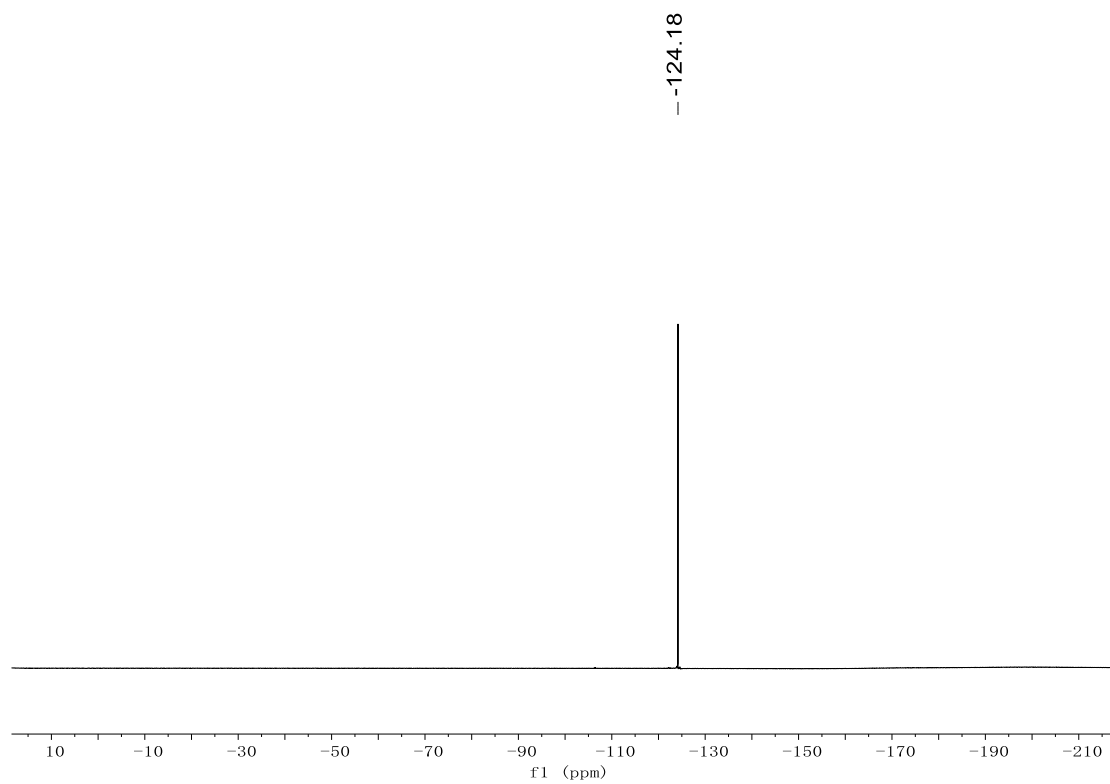

10

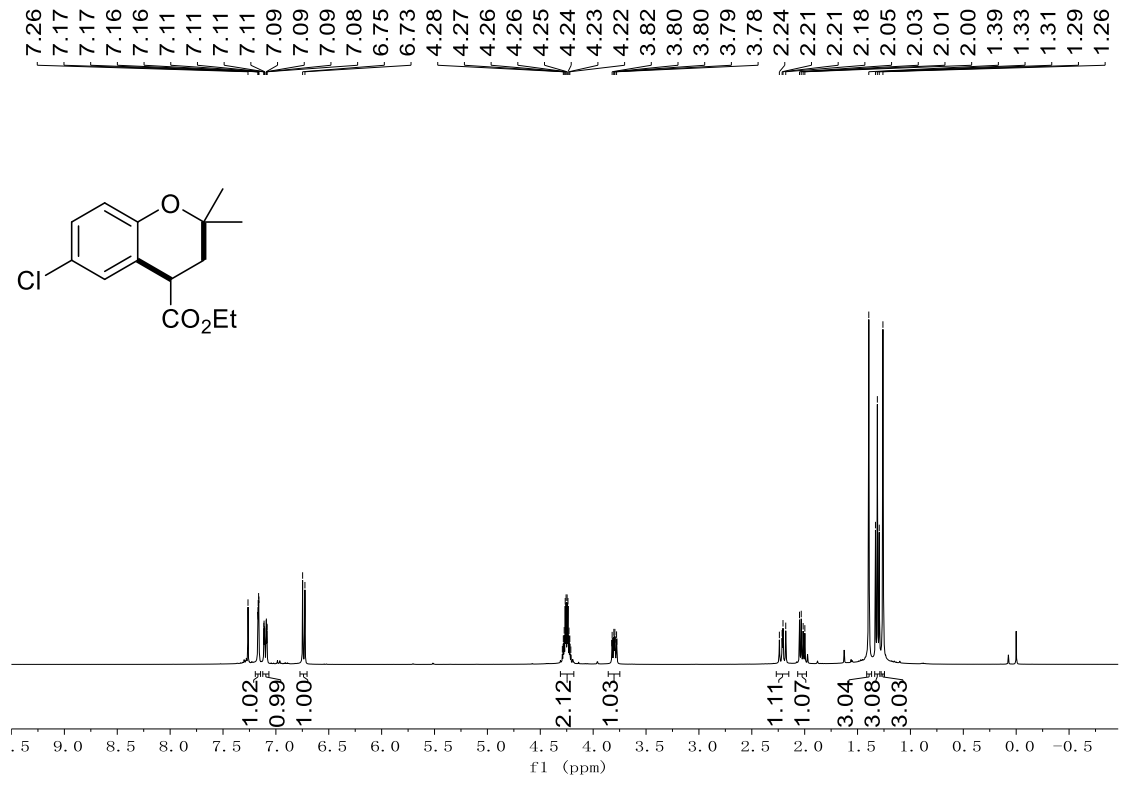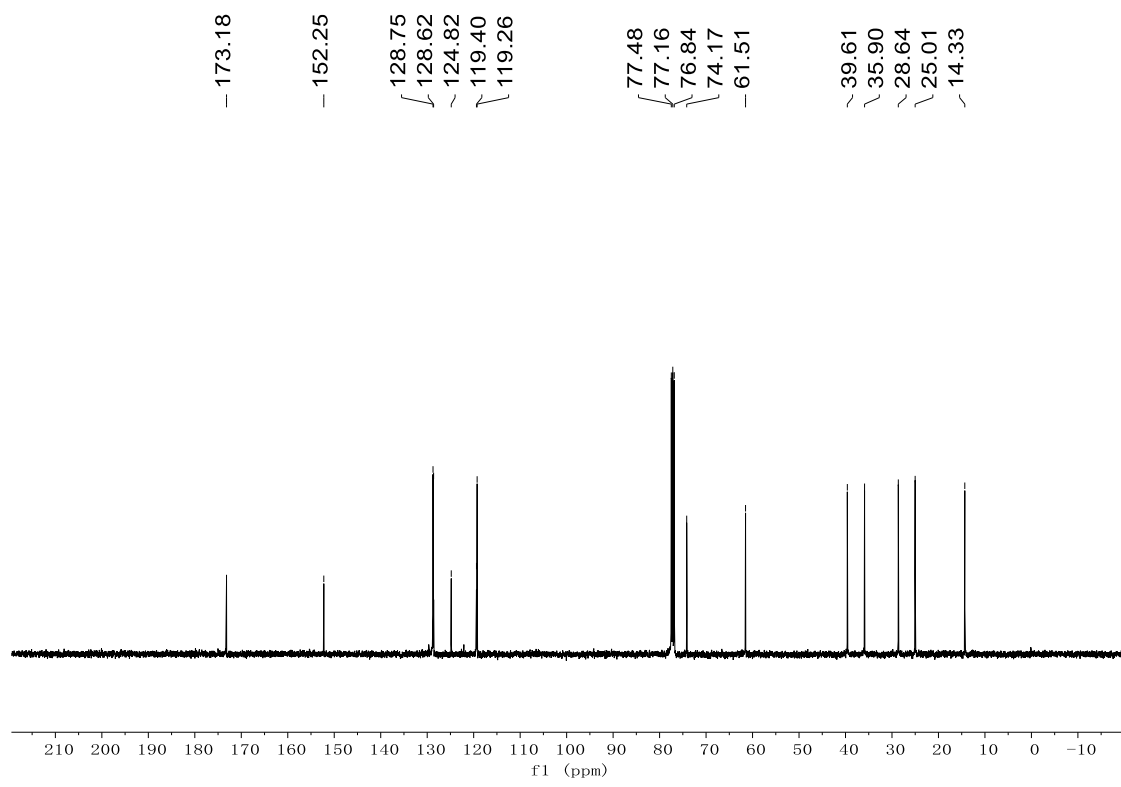



11

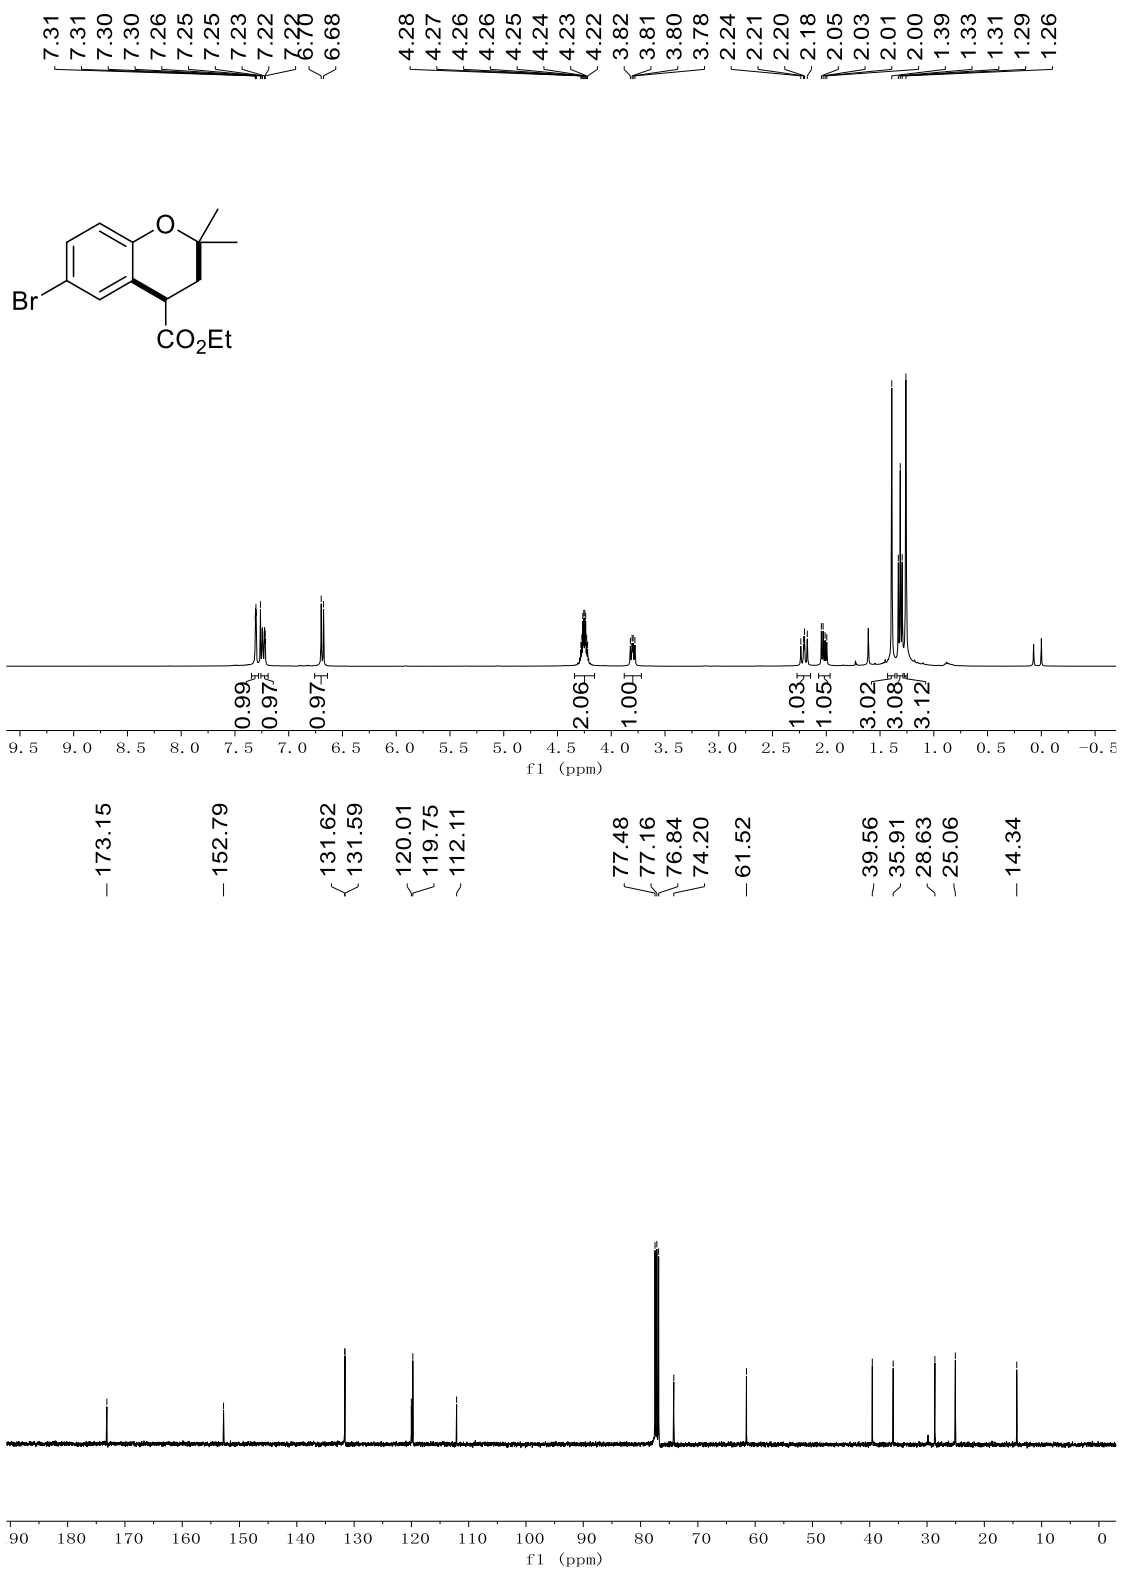

12

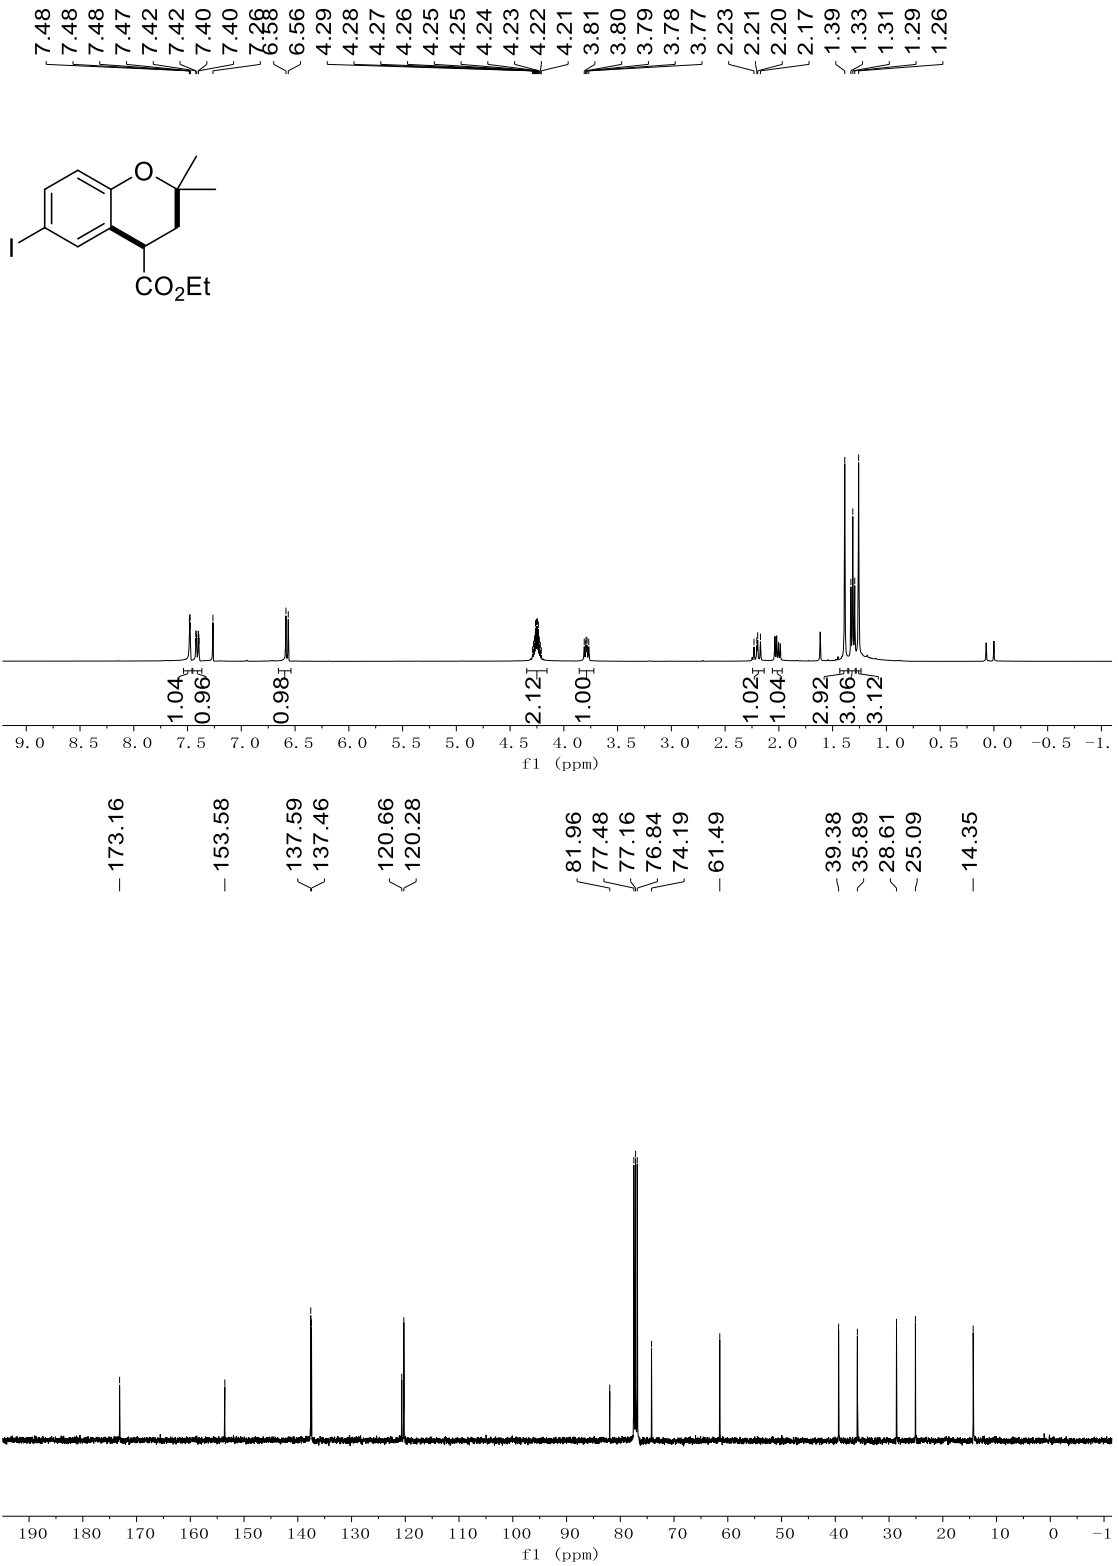

13

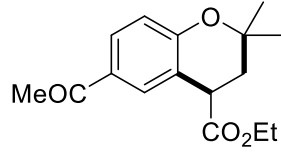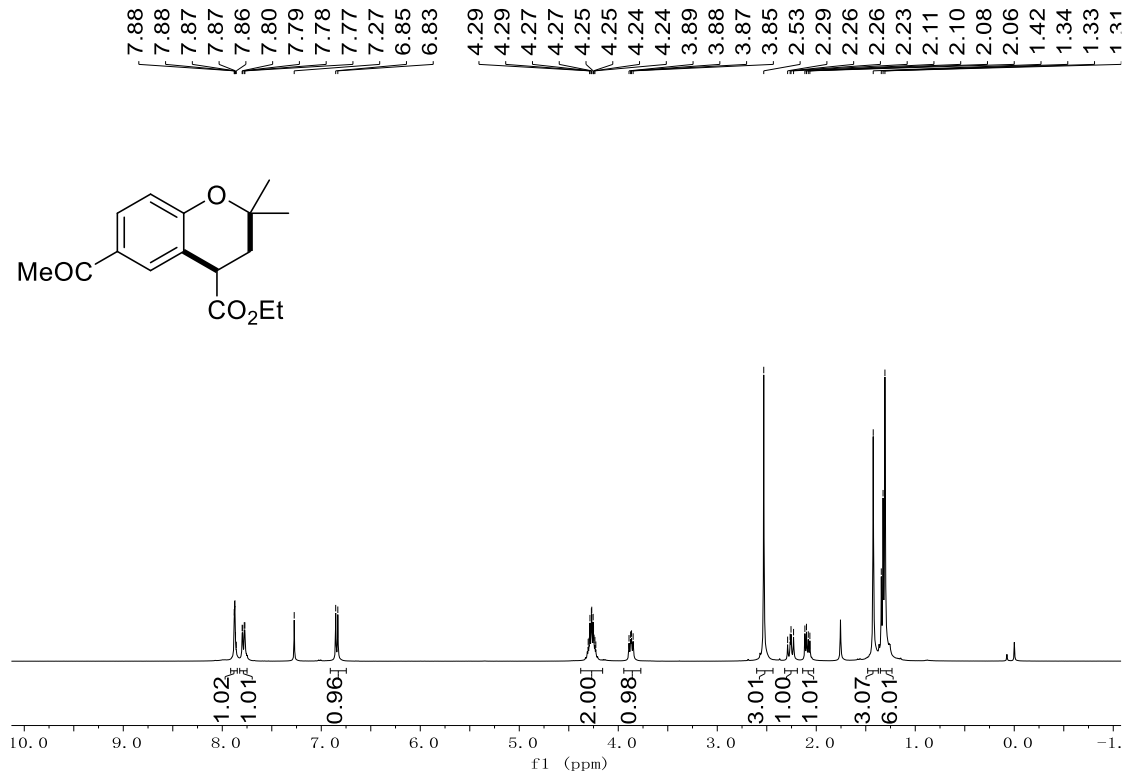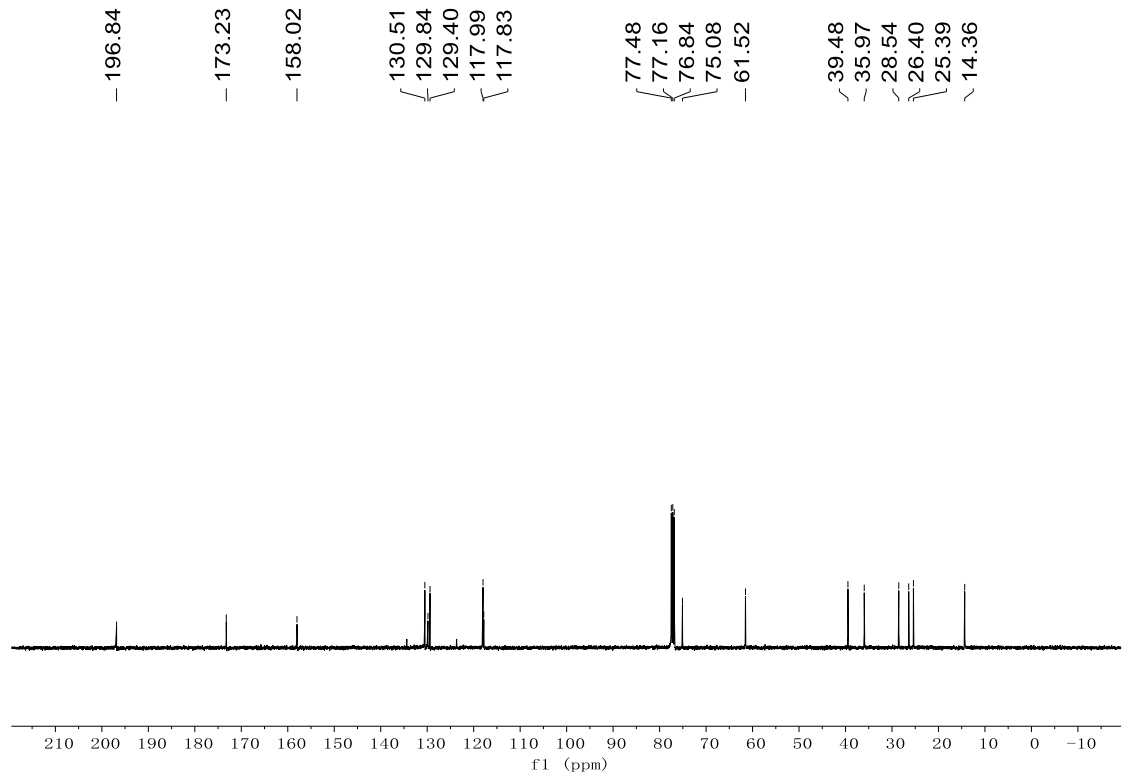

14

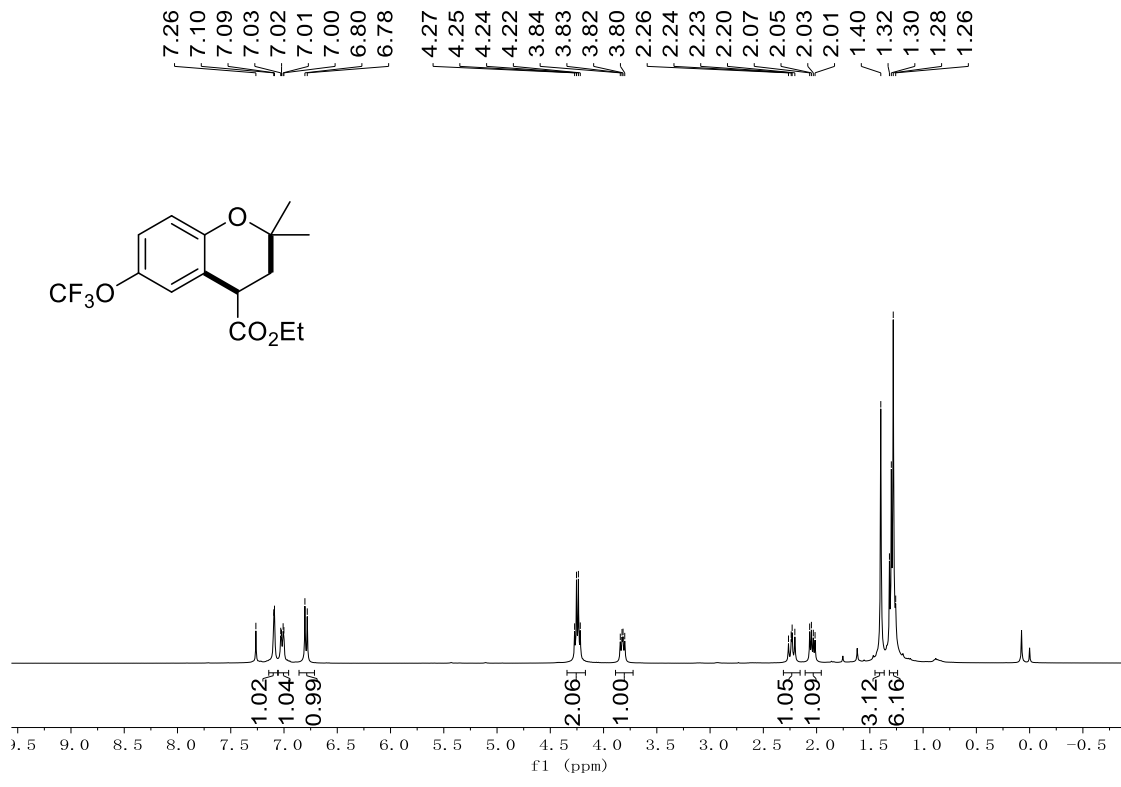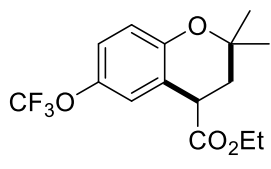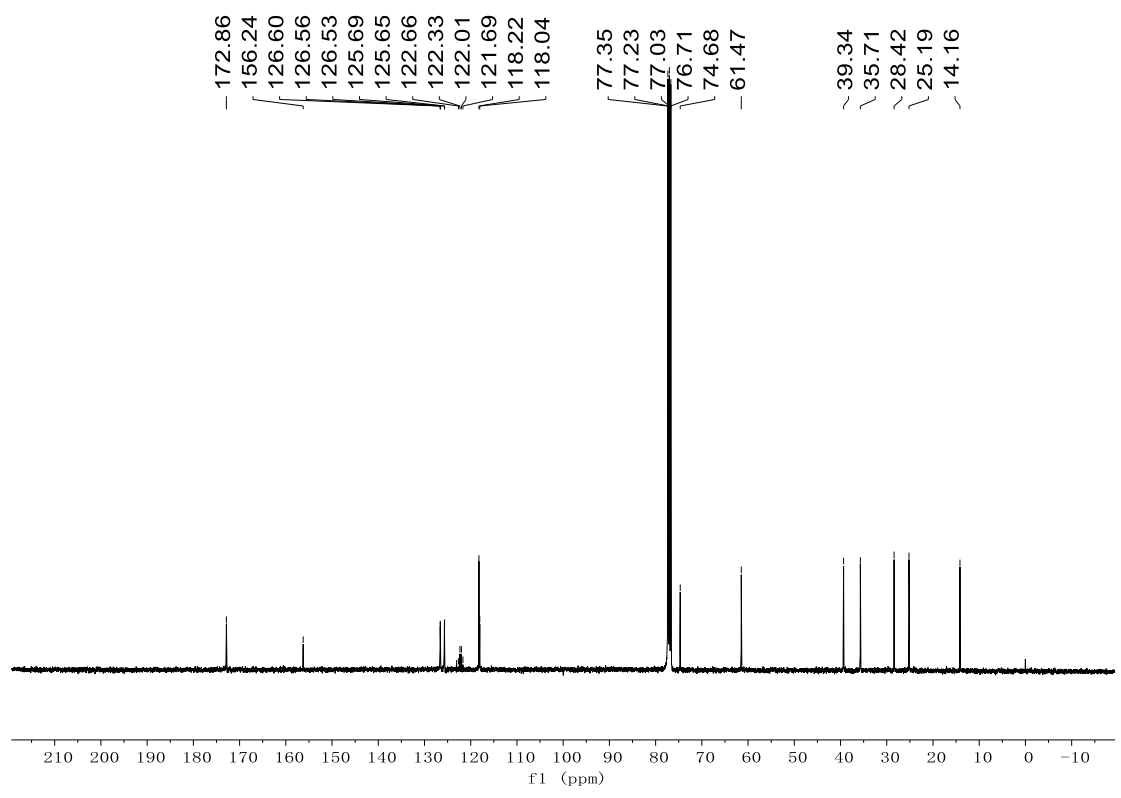

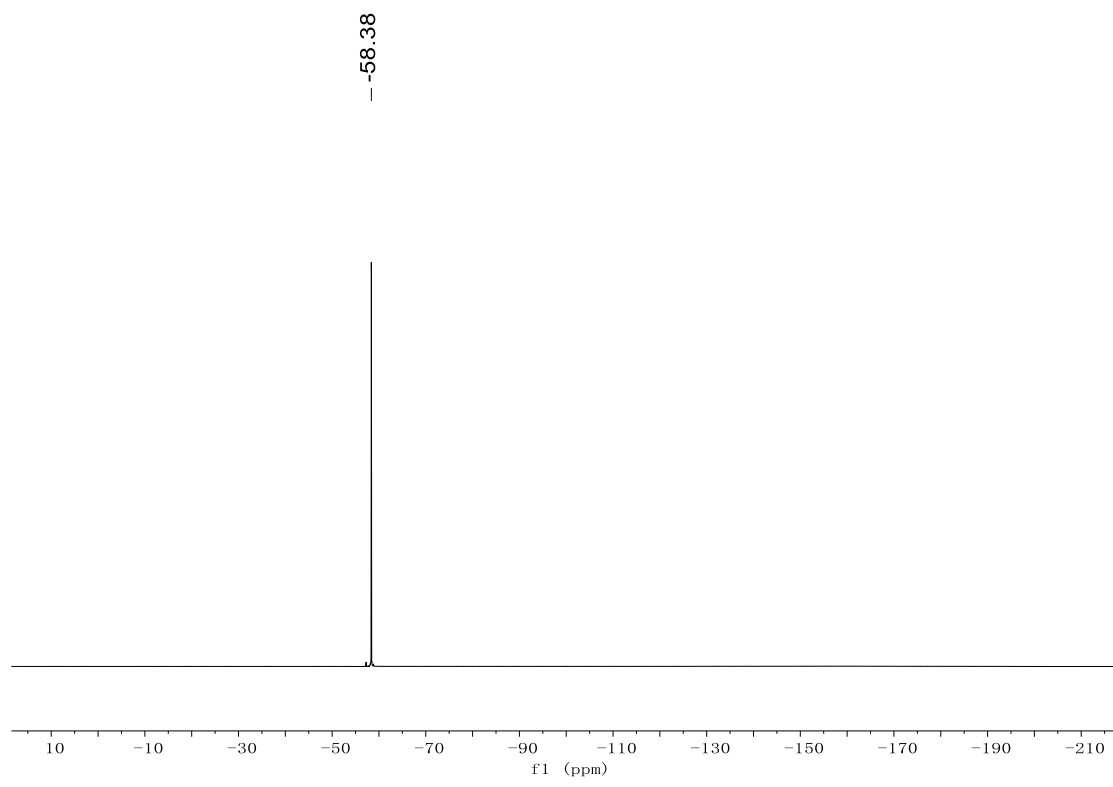

15

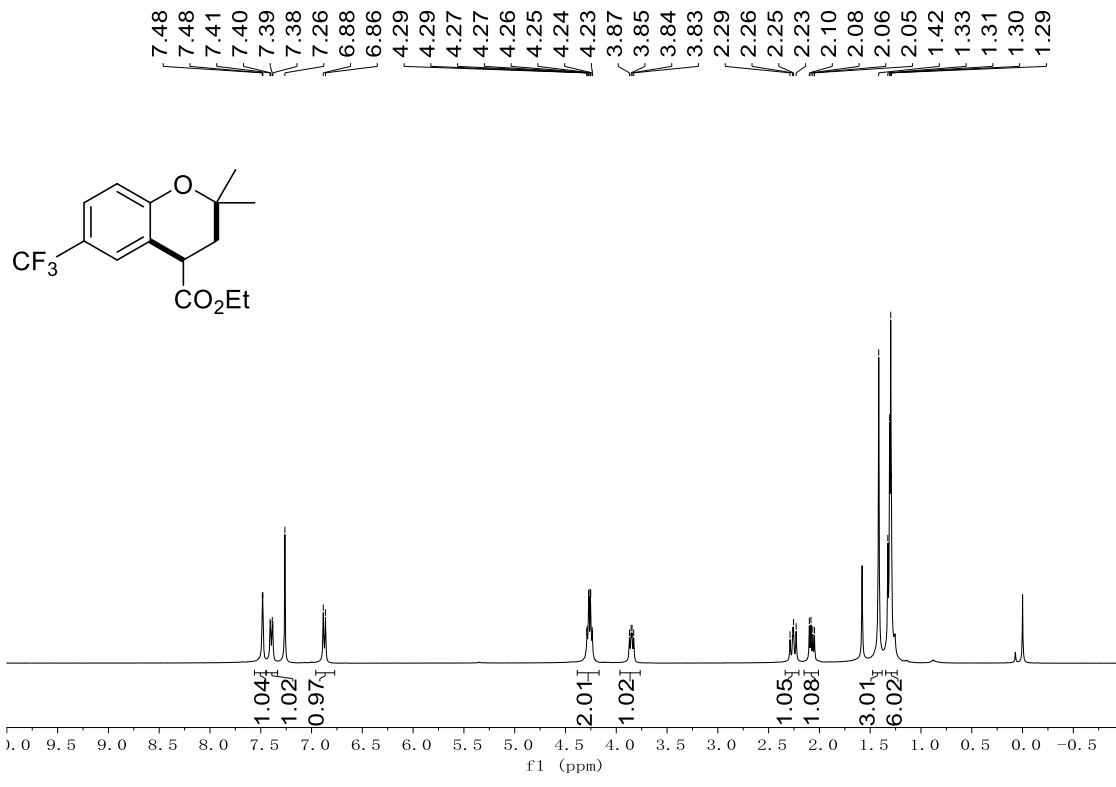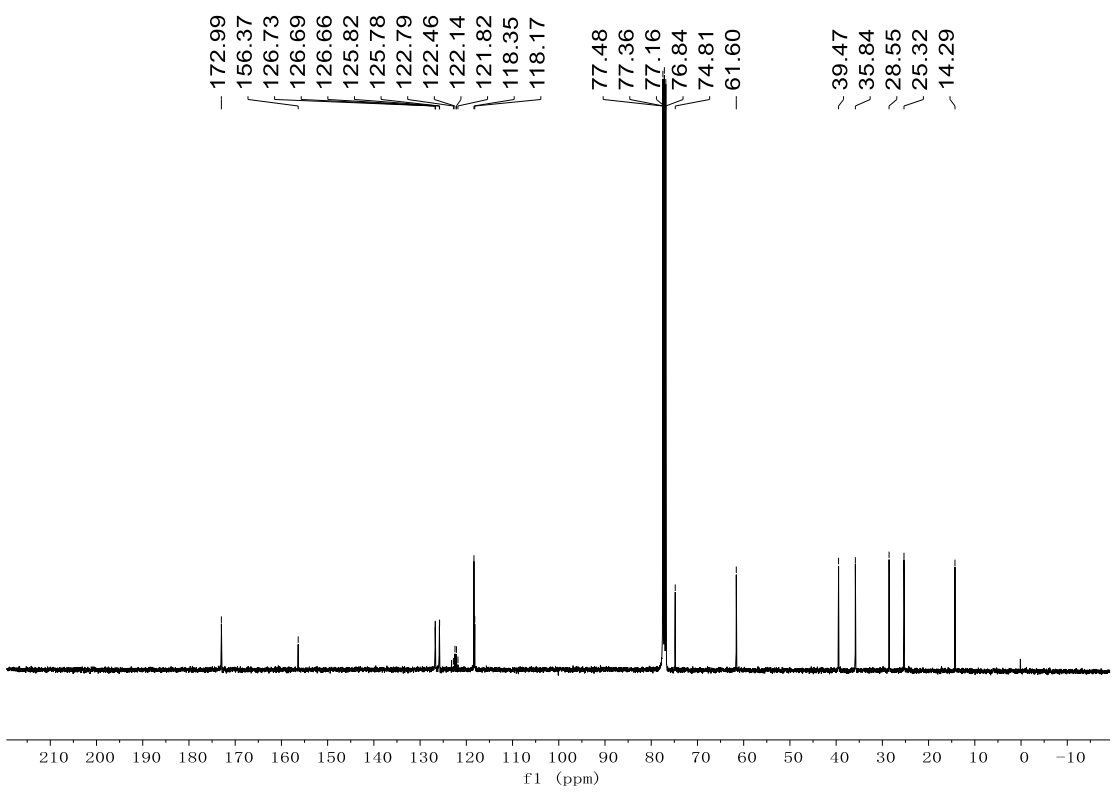

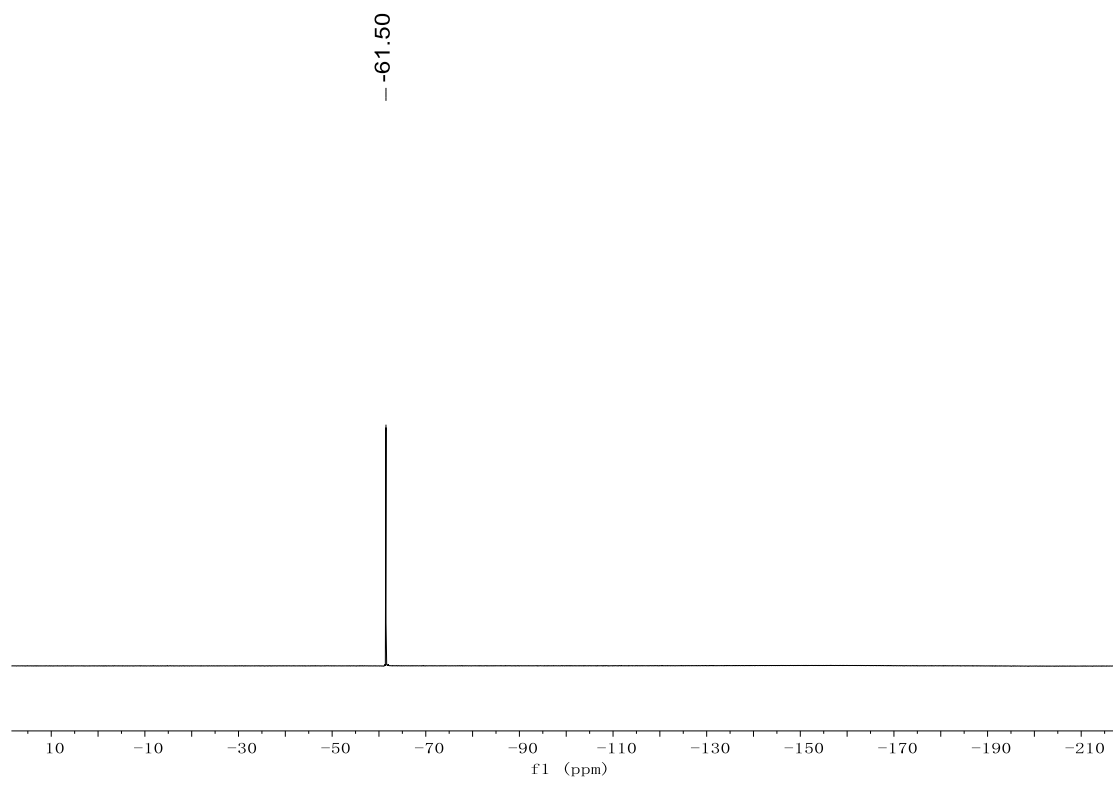

16

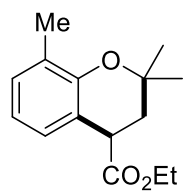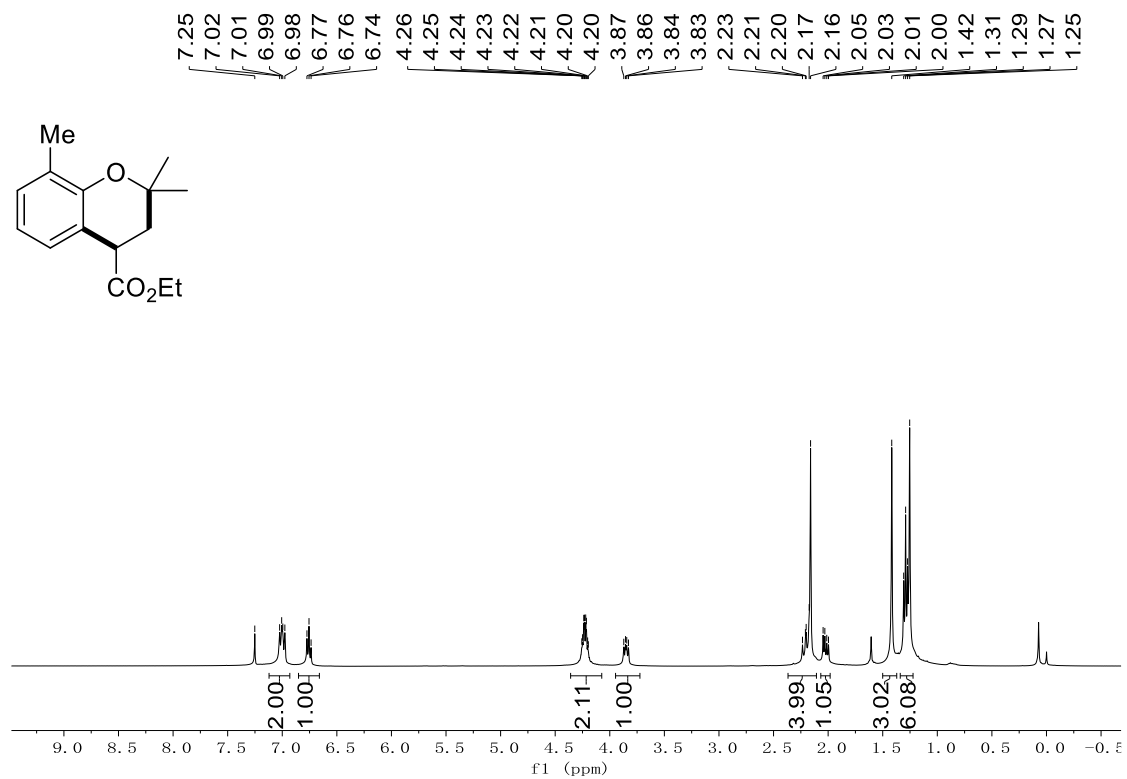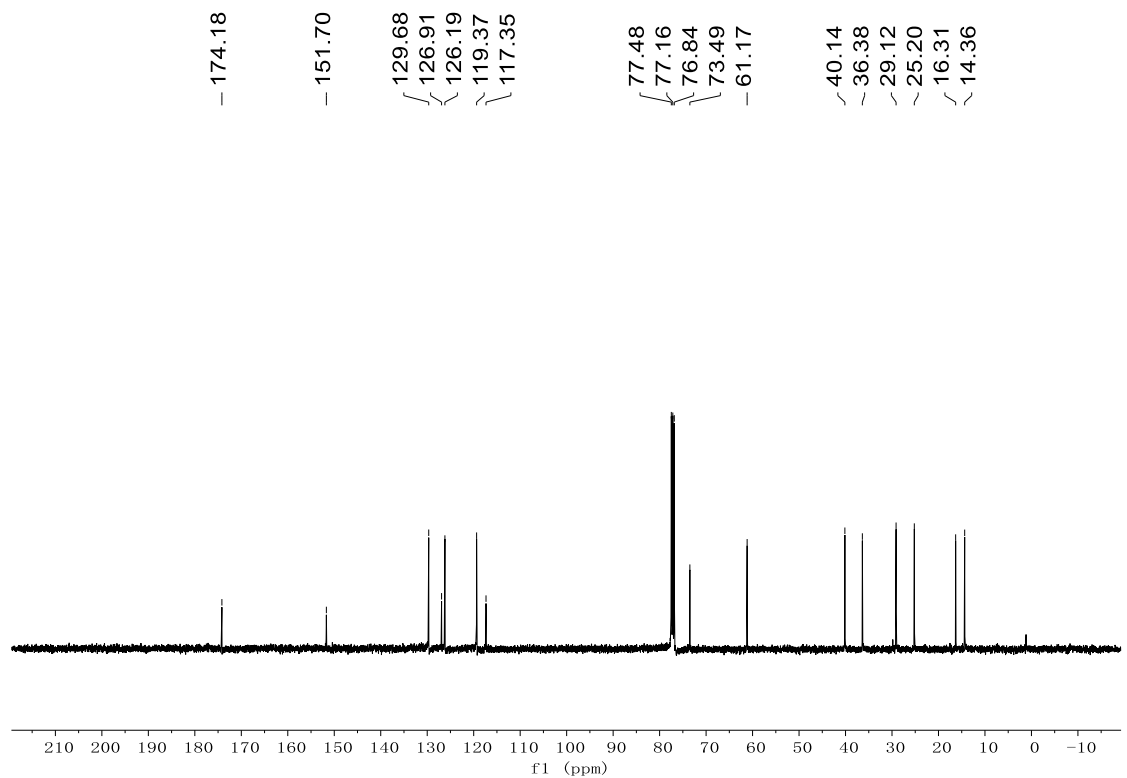



17

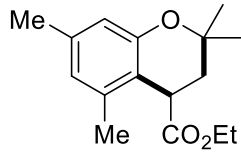

7.25  
 6.58  
 6.58  
 6.52  
 6.52  
 4.21  
 4.19  
 4.18  
 4.16  
 3.75  
 3.73  
 3.71  
 2.25  
 2.24  
 2.22  
 2.20  
 2.14  
 2.13  
 2.12  
 2.10  
 2.08  
 1.32  
 1.28  
 1.27  
 1.25  
 1.24

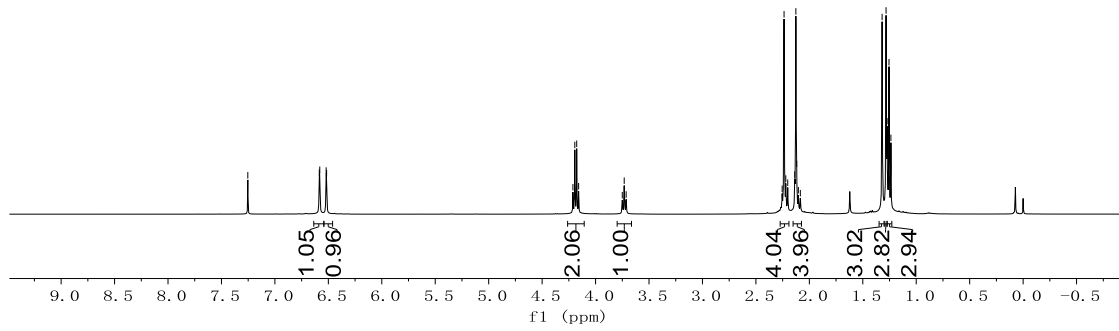

174.58  
 153.76  
 138.22  
 138.02  
 123.42  
 116.07  
 114.25  
 77.48  
 77.16  
 76.84  
 73.12  
 61.13  
 38.73  
 37.66  
 27.22  
 26.47  
 21.15  
 19.50  
 14.26

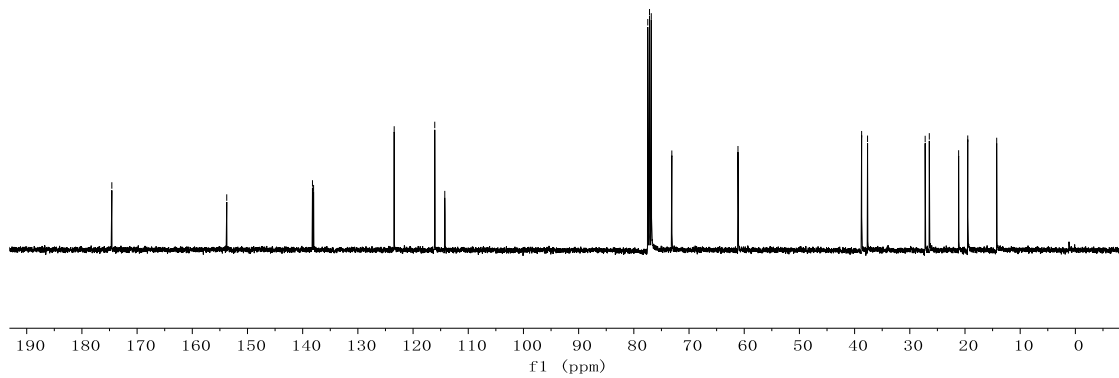

18

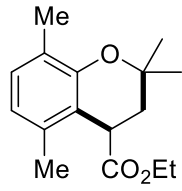

7.24  
6.95  
6.94  
6.65  
6.63  
4.21  
4.19  
4.17  
4.15  
3.79  
3.77  
3.75  
2.26  
2.24  
2.22  
2.20  
2.15  
2.13  
2.13  
2.11  
2.09  
1.34  
1.27  
1.27  
1.25  
1.23

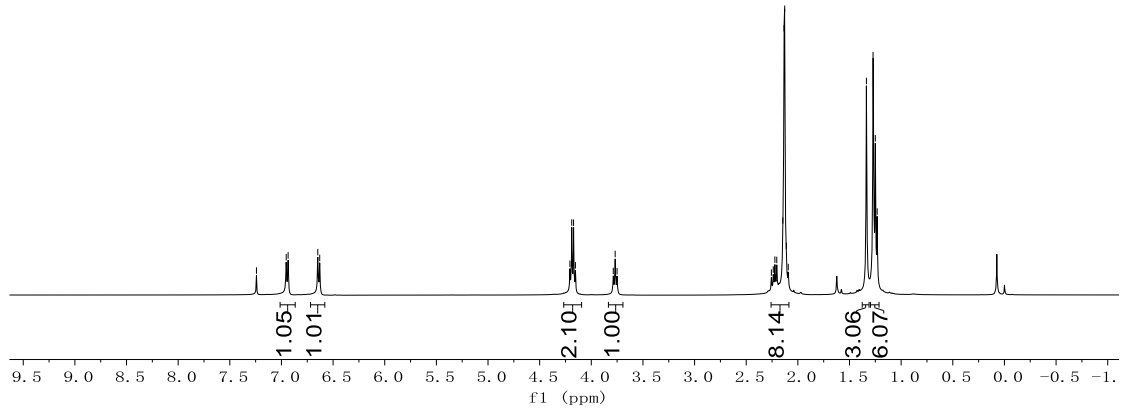

174.67  
152.02  
135.45  
129.31  
124.34  
121.31  
116.68  
77.48  
77.16  
76.84  
72.93  
61.10  
39.20  
37.59  
27.51  
26.51  
19.39  
16.22  
14.24

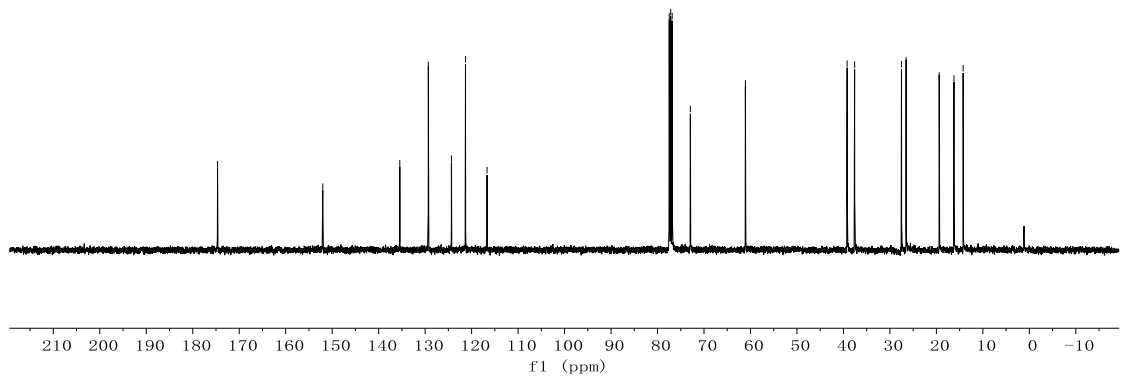

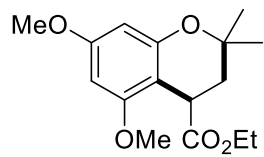

19

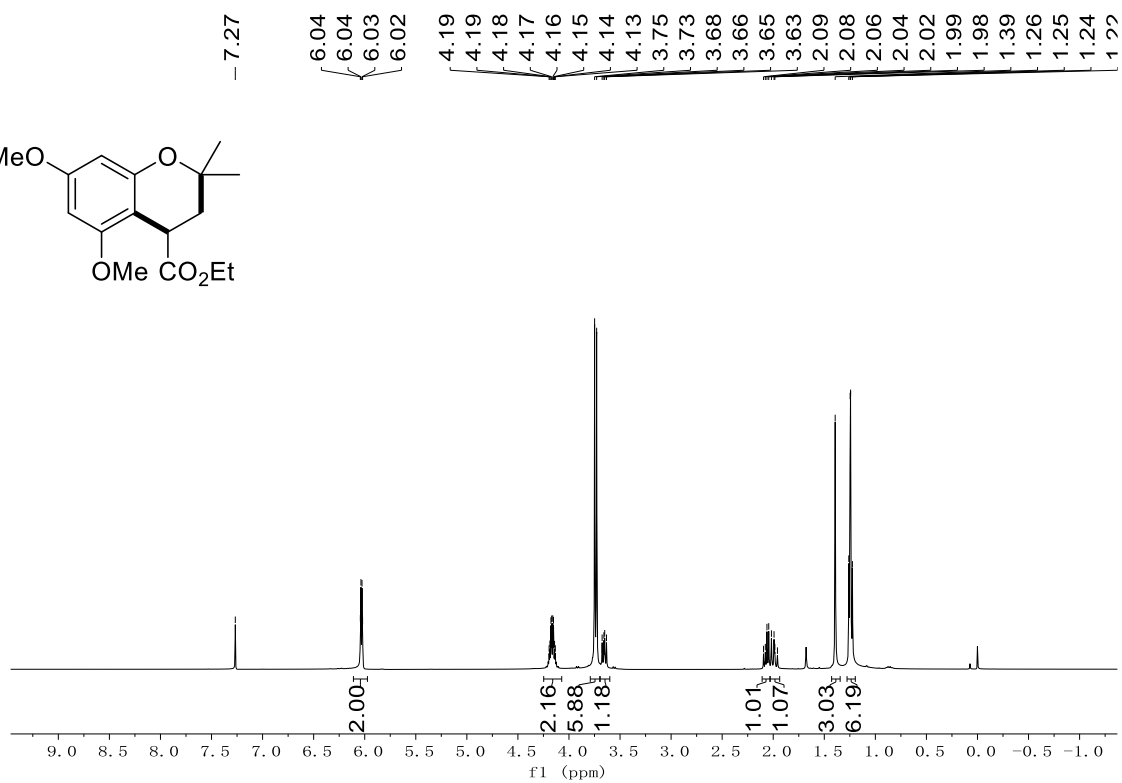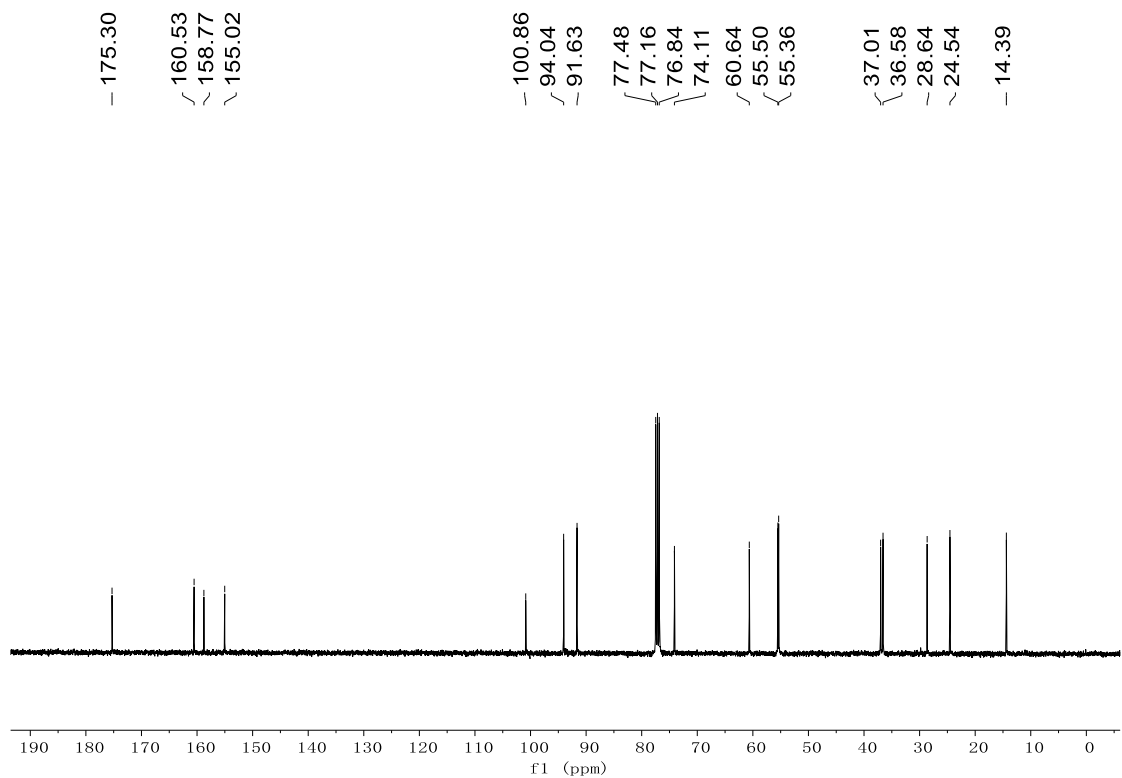

20

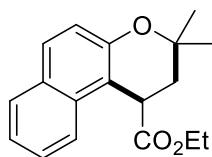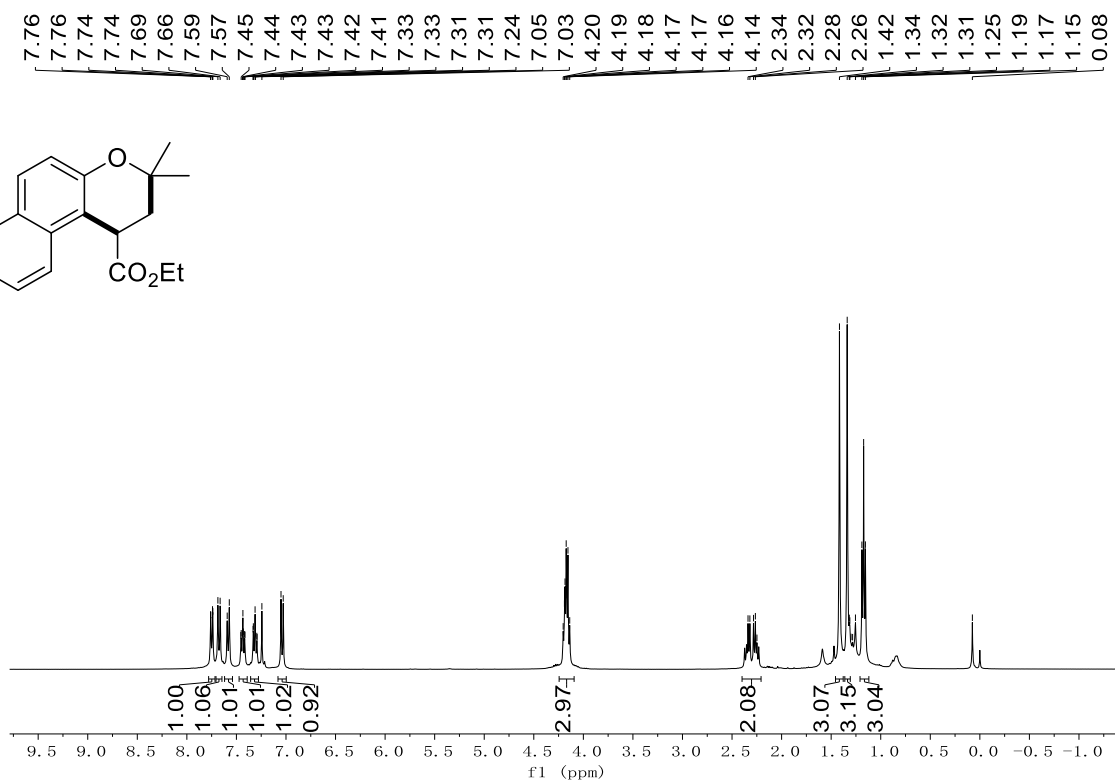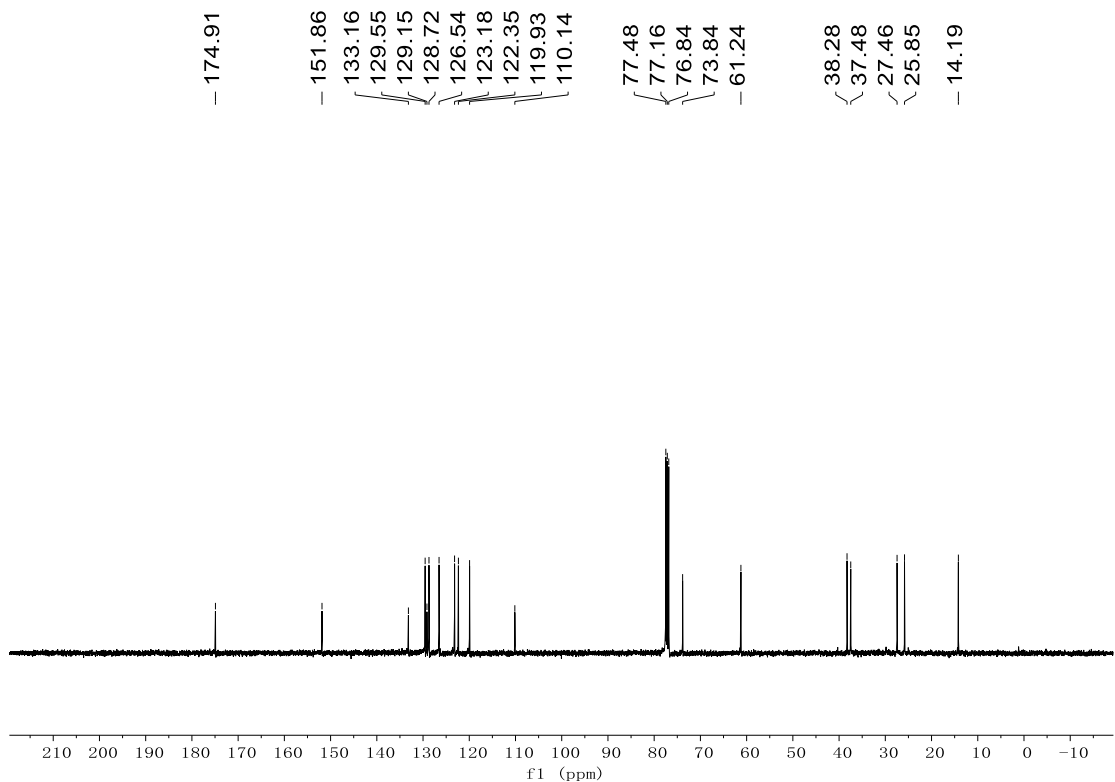

21

7.26  
7.07  
7.05  
6.48  
6.48  
6.46  
6.46  
6.36  
6.36  
4.25  
4.25  
4.24  
4.23  
4.22  
4.22  
4.20  
4.20  
3.80  
3.78  
3.77  
3.75  
2.23  
2.20  
2.19  
2.17  
2.04  
2.02  
2.01  
1.99  
1.40  
1.31  
1.29  
1.28

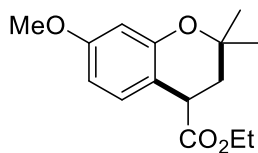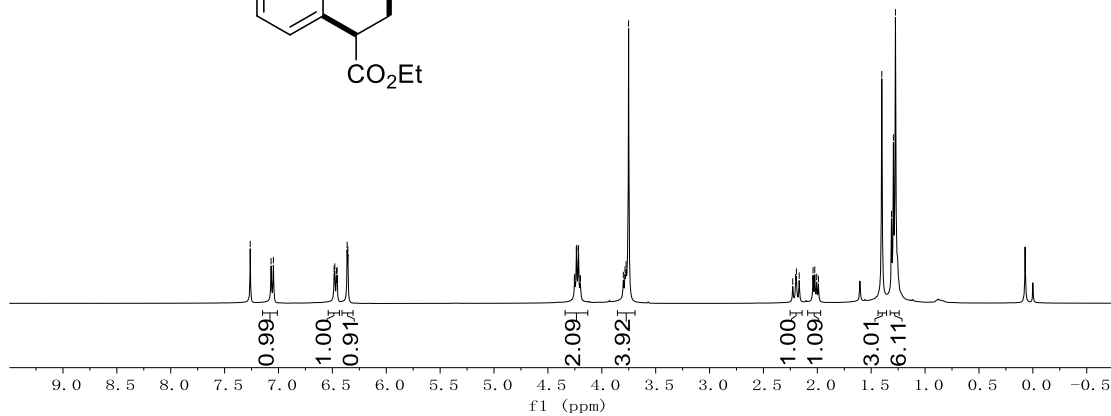

-174.09  
-160.05  
-154.48  
-129.55  
-110.20  
-107.65  
-102.08  
77.48  
77.16  
76.84  
74.01  
-61.20  
-55.35  
-39.26  
-36.38  
-28.82  
-25.03  
-14.38

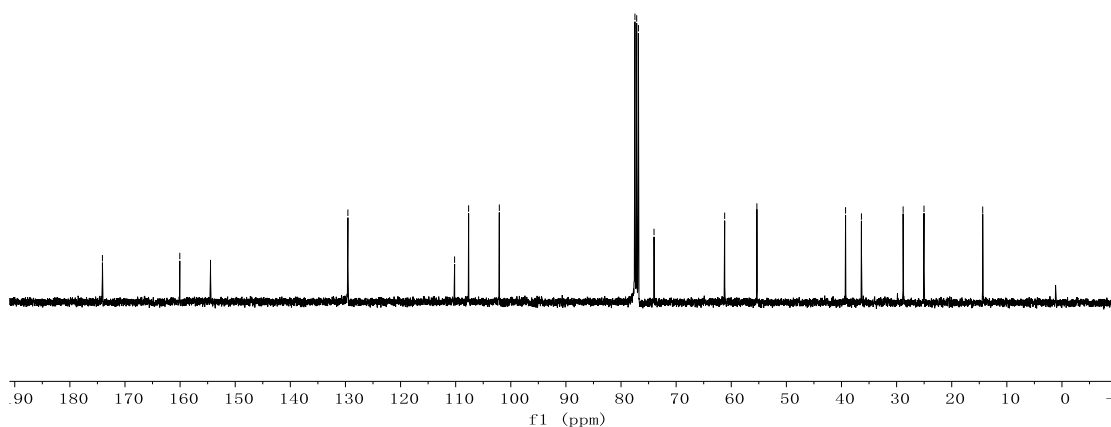

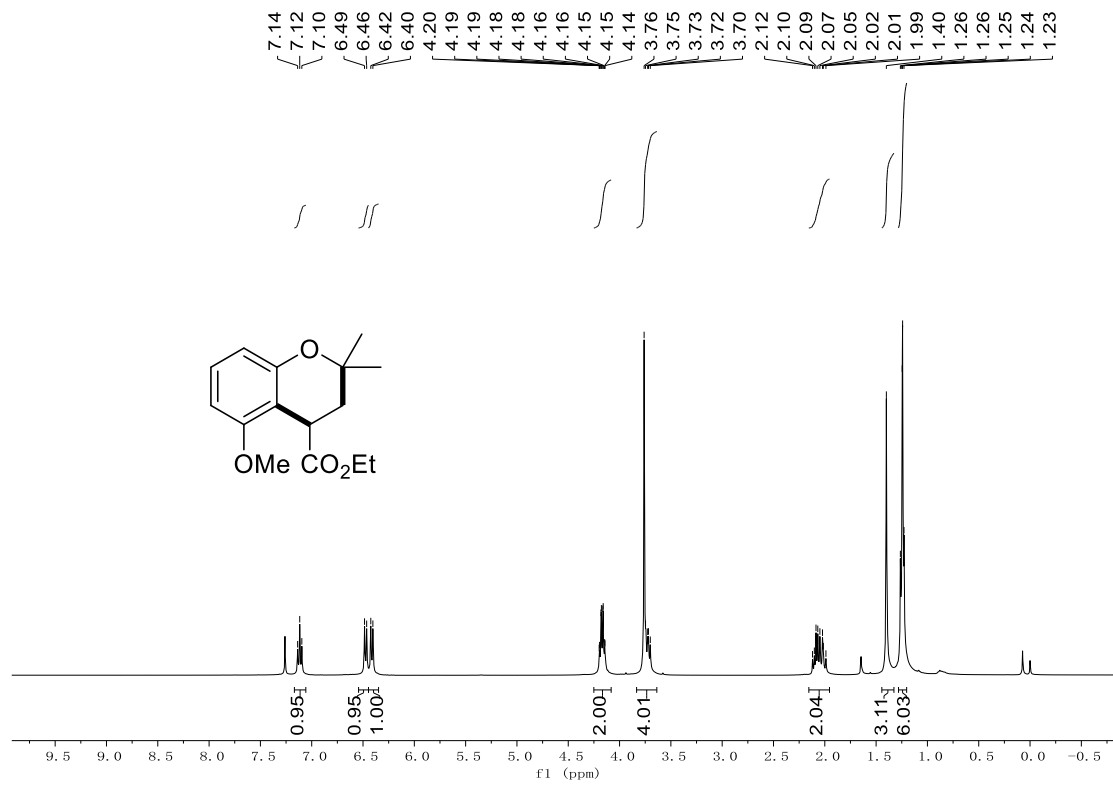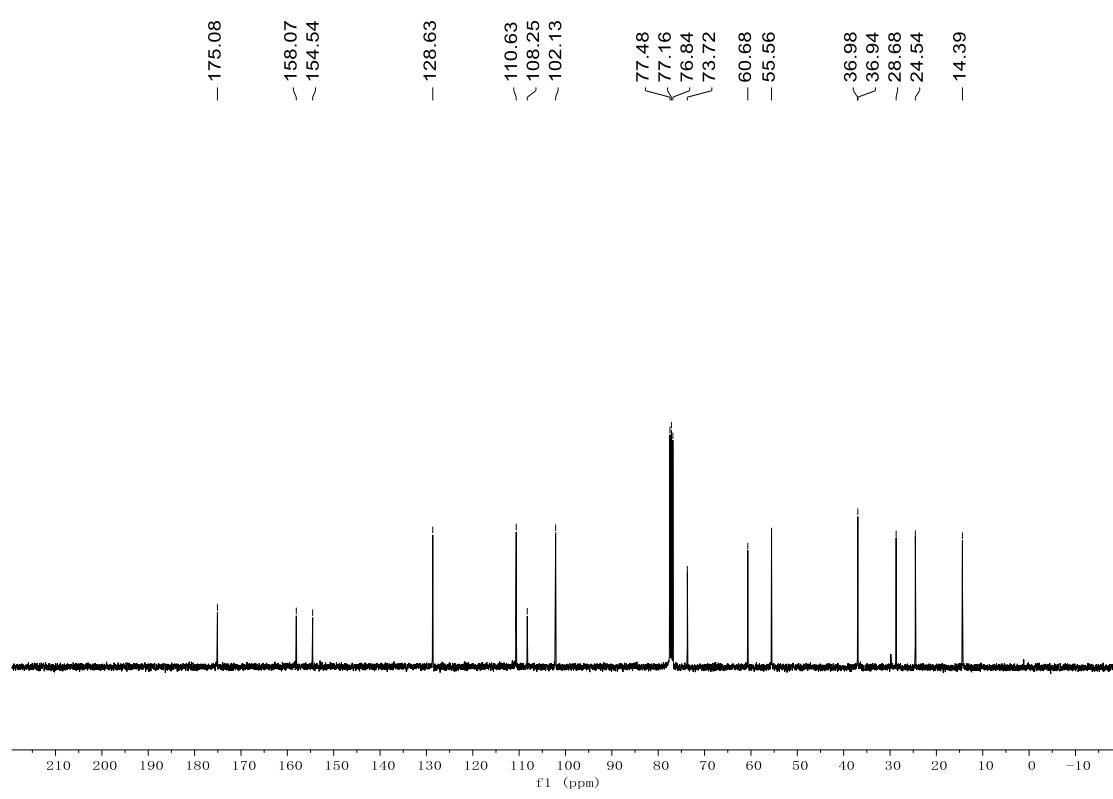

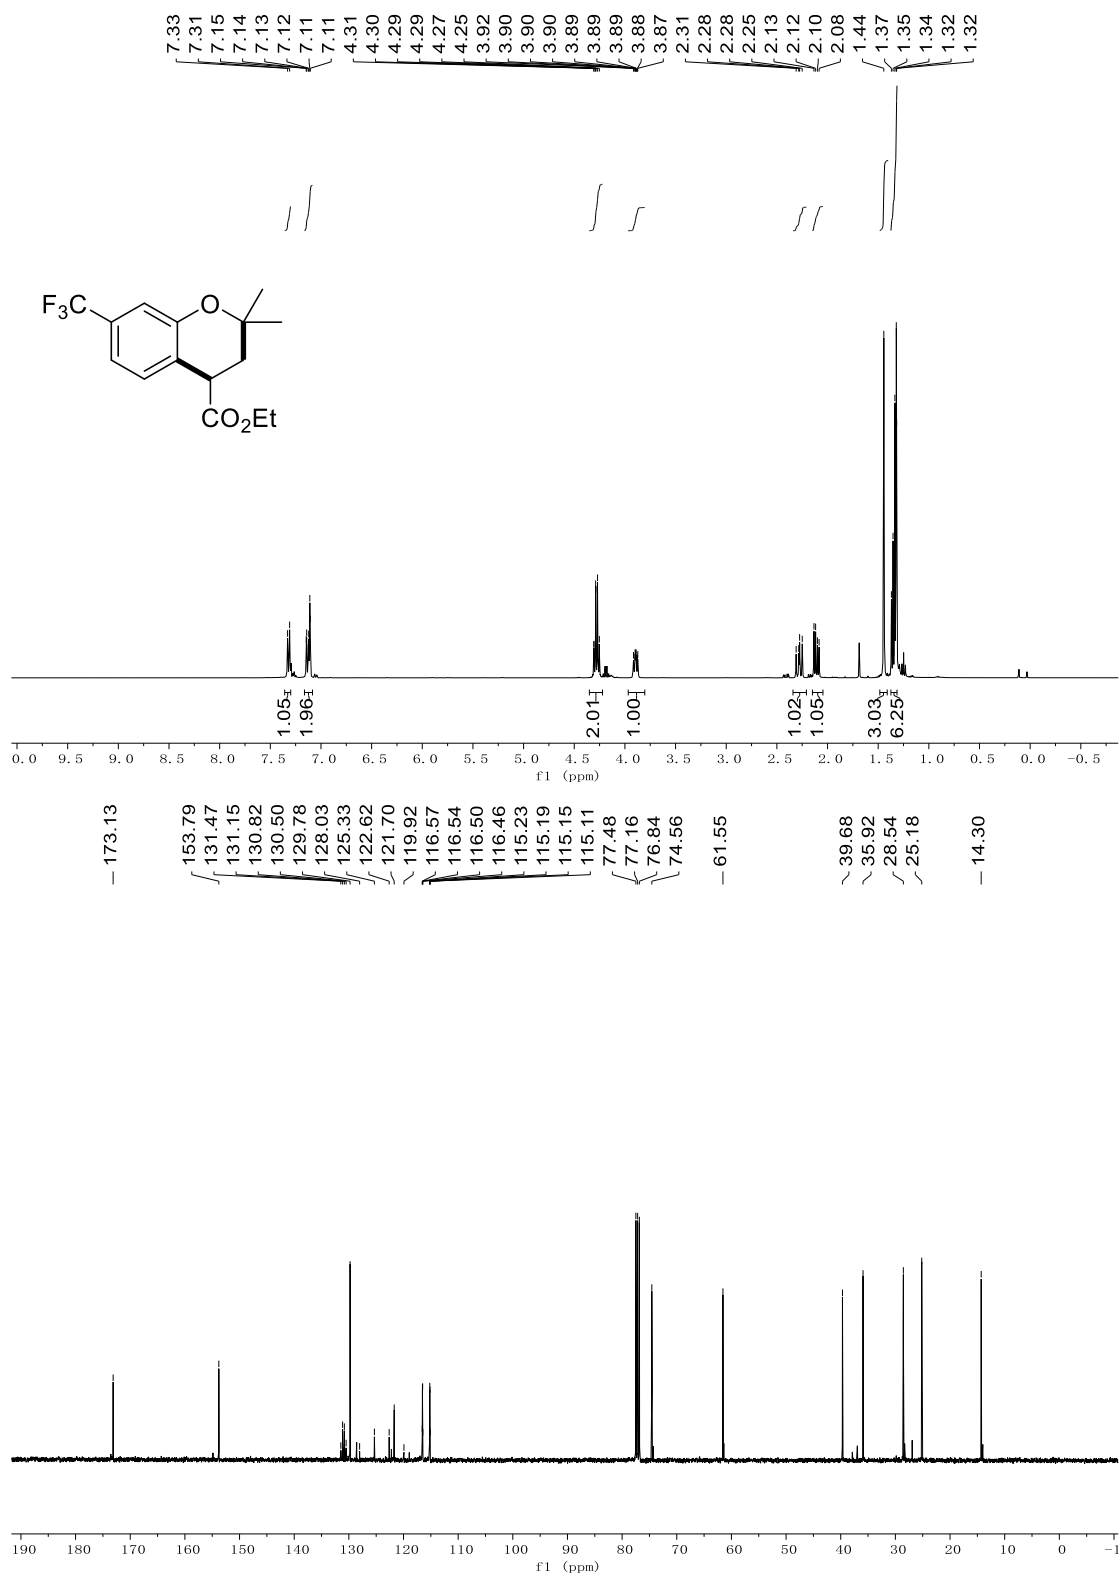

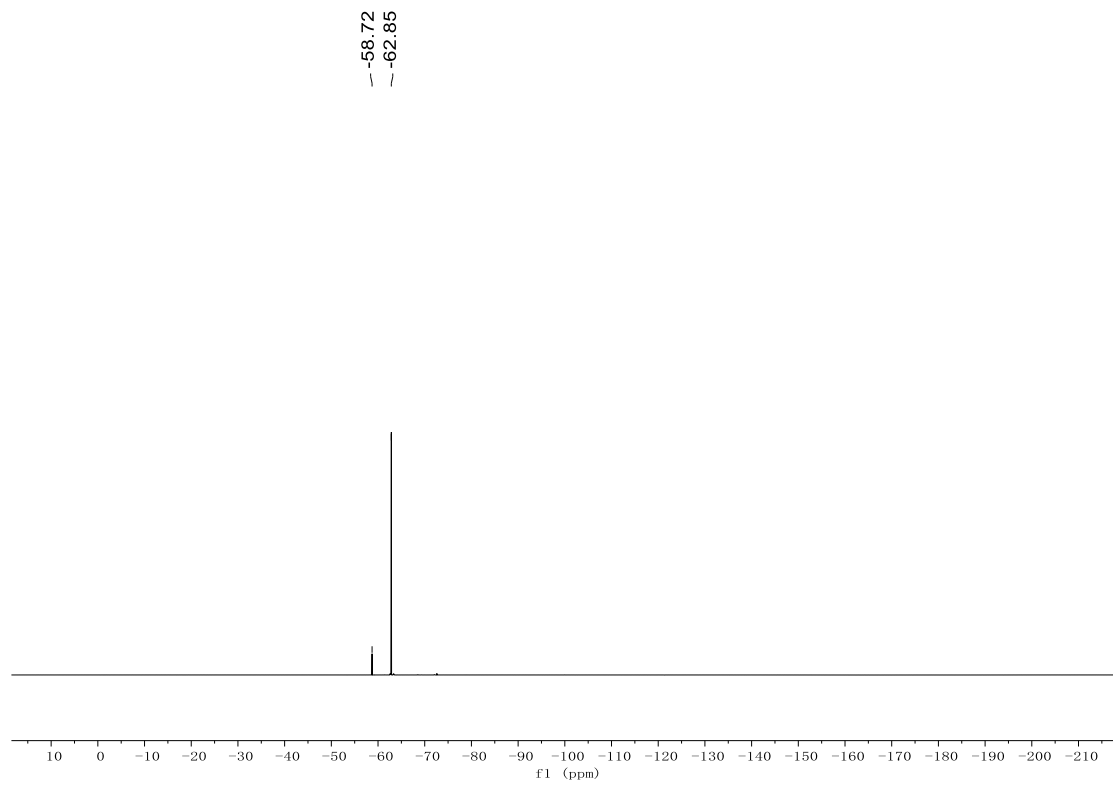



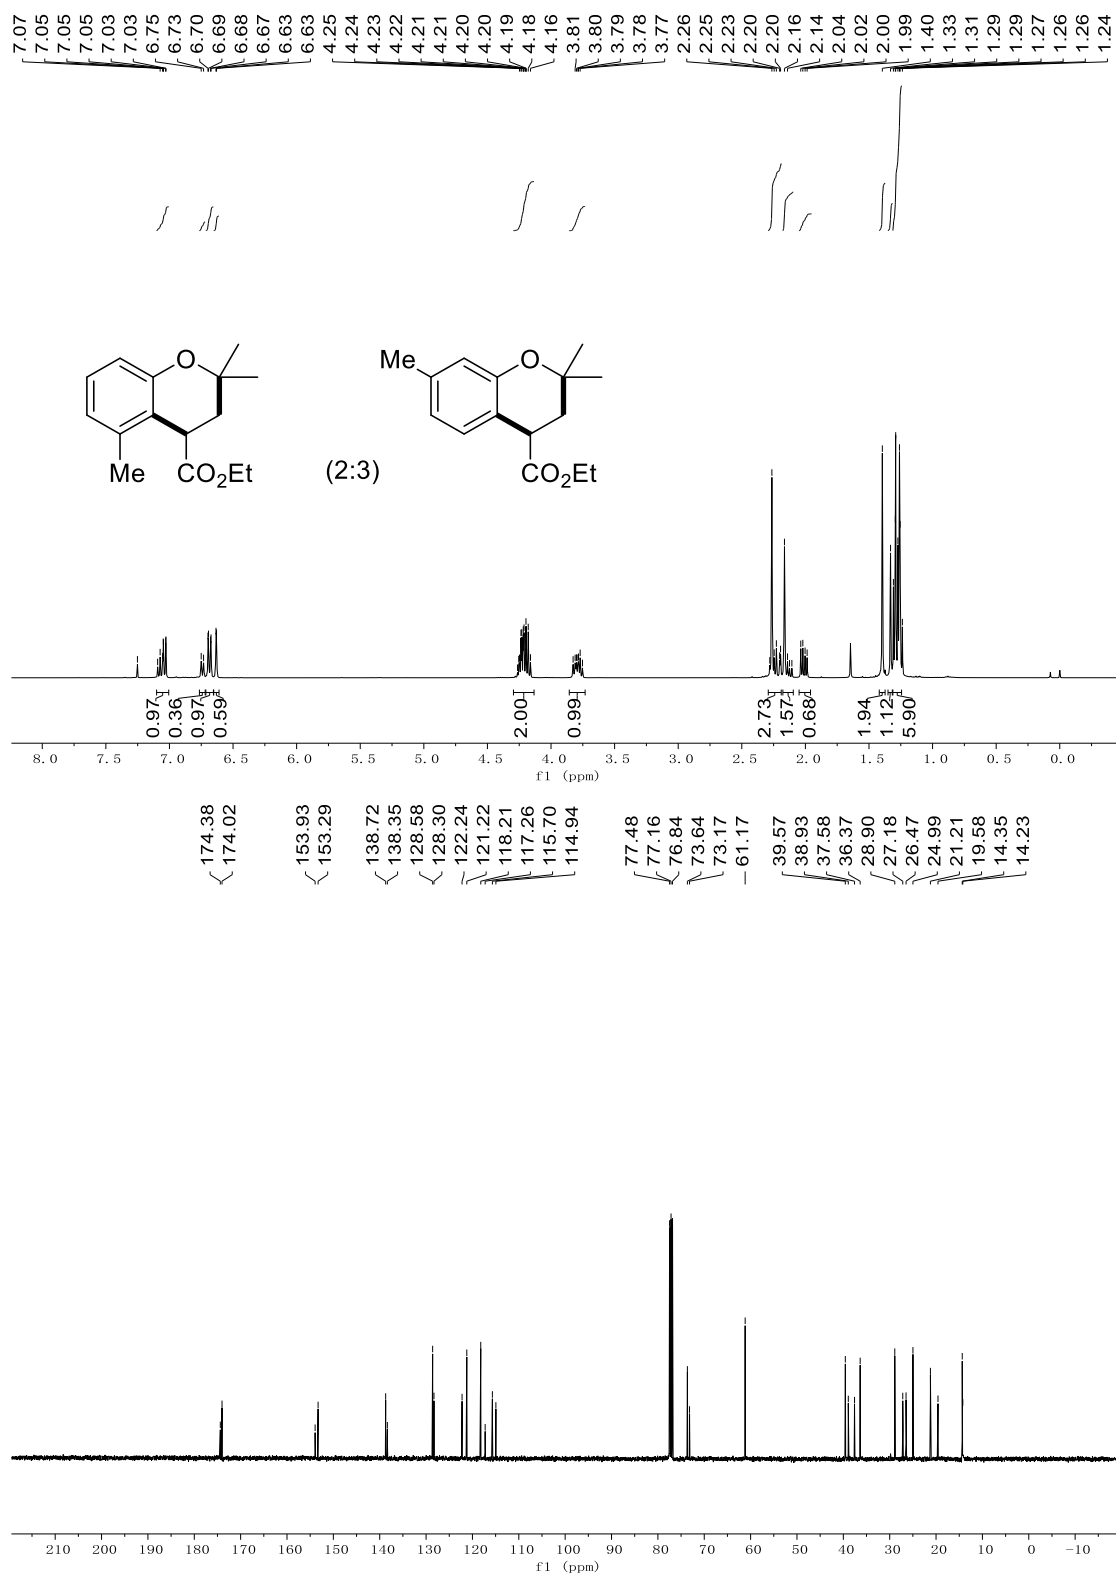

24

7.73  
7.72  
7.72  
7.71  
7.70  
7.67  
7.66  
7.65  
7.64  
7.45  
7.45  
7.43  
7.27  
6.89  
6.87  
4.26  
4.25  
4.24  
4.23  
4.22  
4.22  
4.21  
4.20  
4.19  
3.88  
3.87  
3.86  
3.84  
2.31  
2.28  
2.27  
2.25  
2.12  
2.11  
2.09  
2.07  
1.44  
1.33  
1.28  
1.27  
1.25

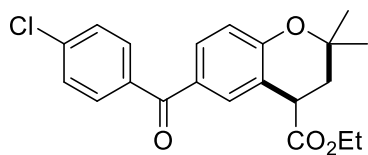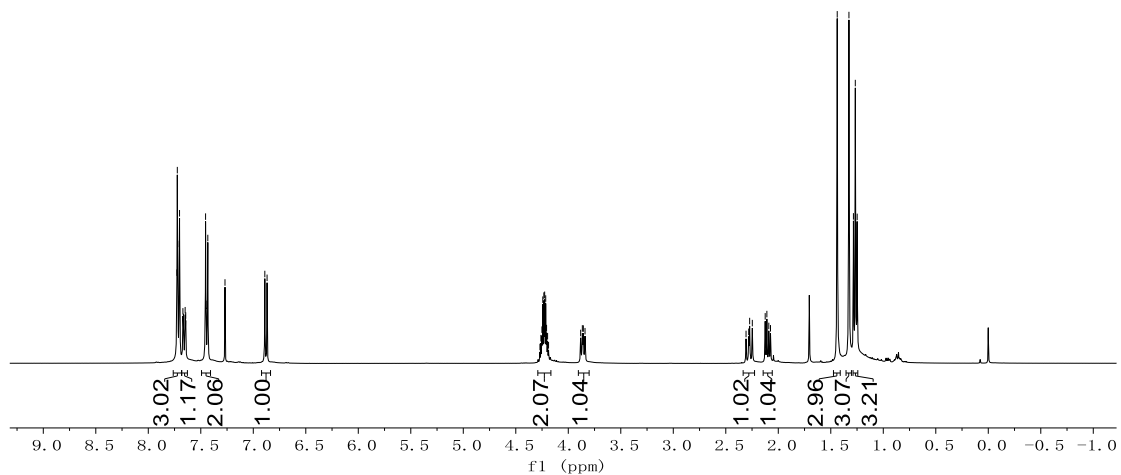

- 194.26  
- 173.16  
- 157.98  
138.30  
136.67  
132.60  
131.29  
131.18  
129.19  
128.57  
118.00  
117.86  
77.48  
77.16  
76.84  
75.19  
61.57  
39.42  
35.94  
28.52  
25.48  
14.28

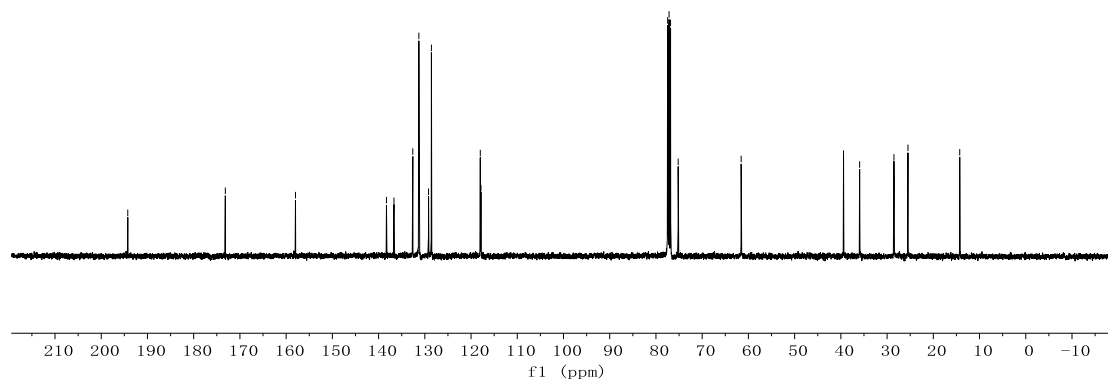

25

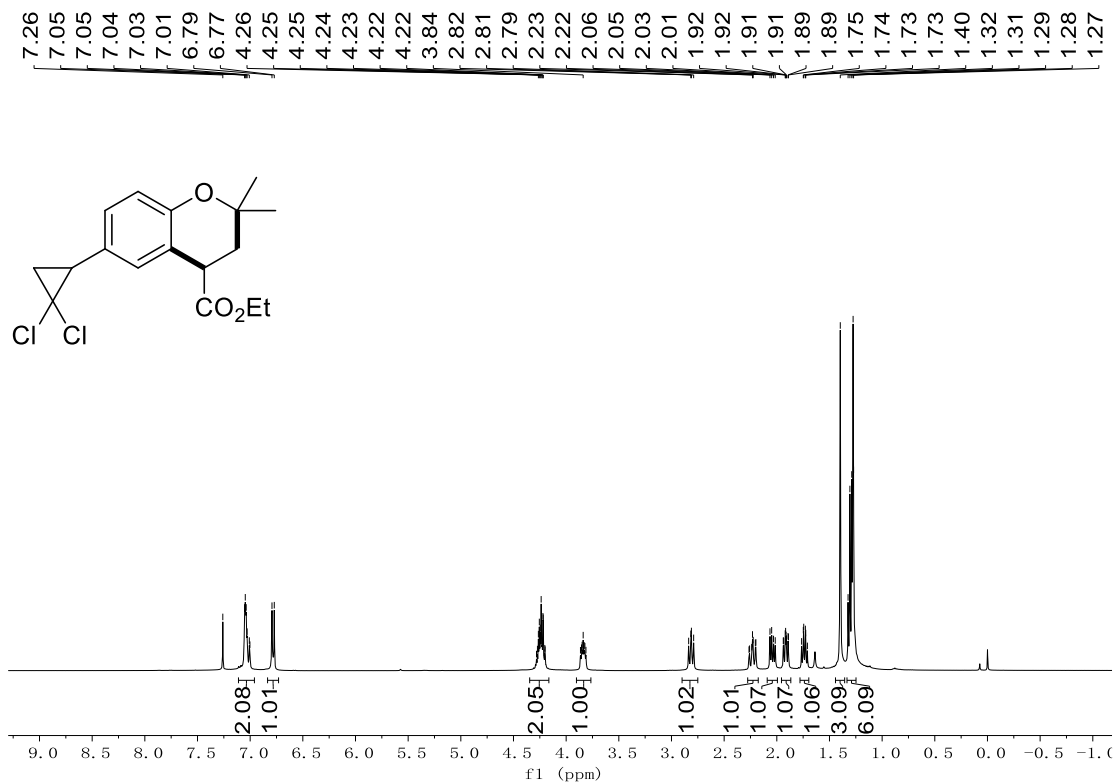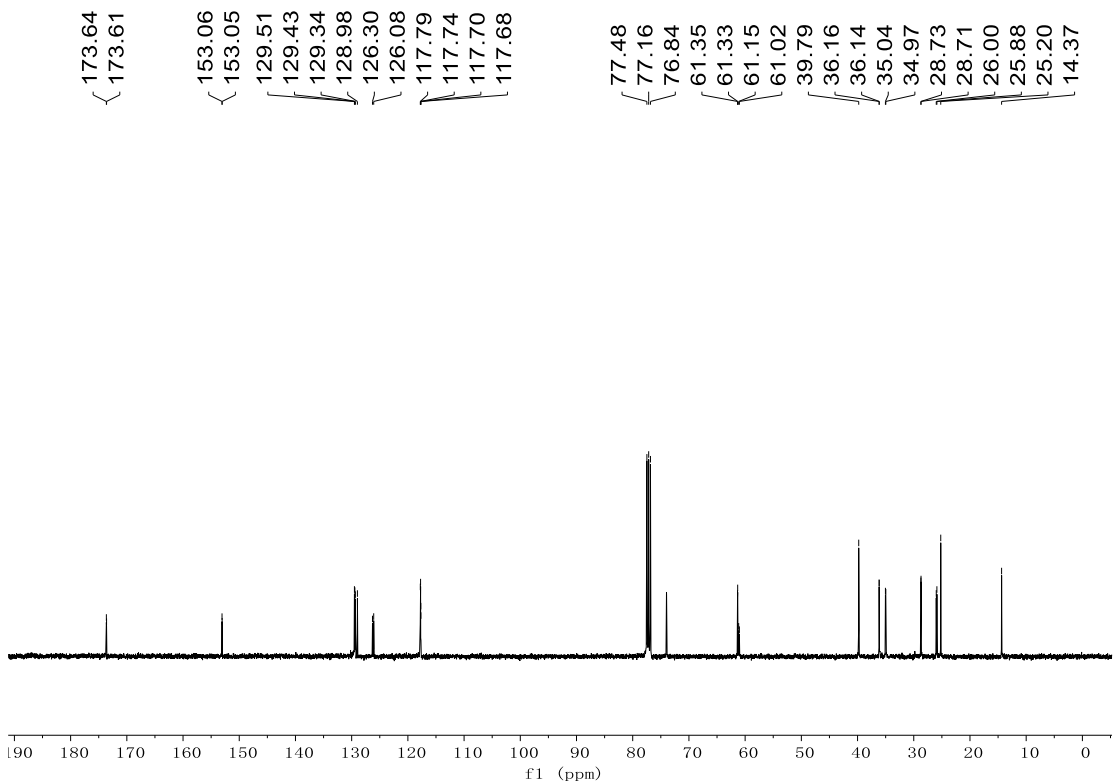

75

26

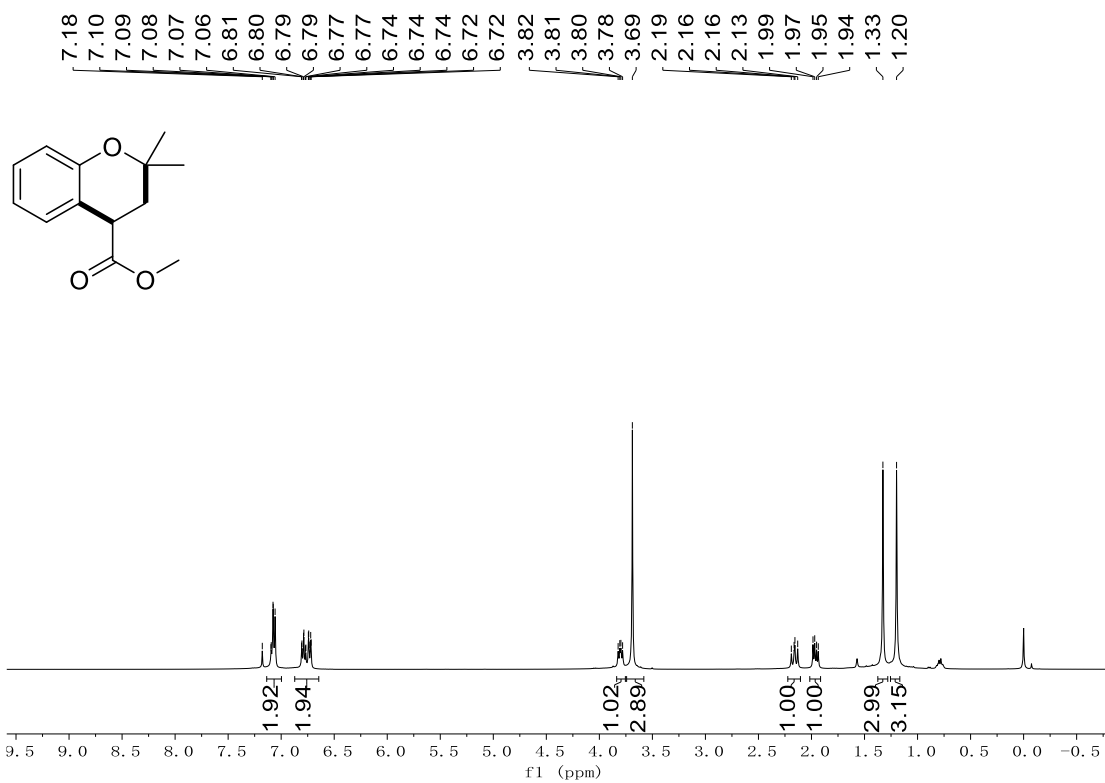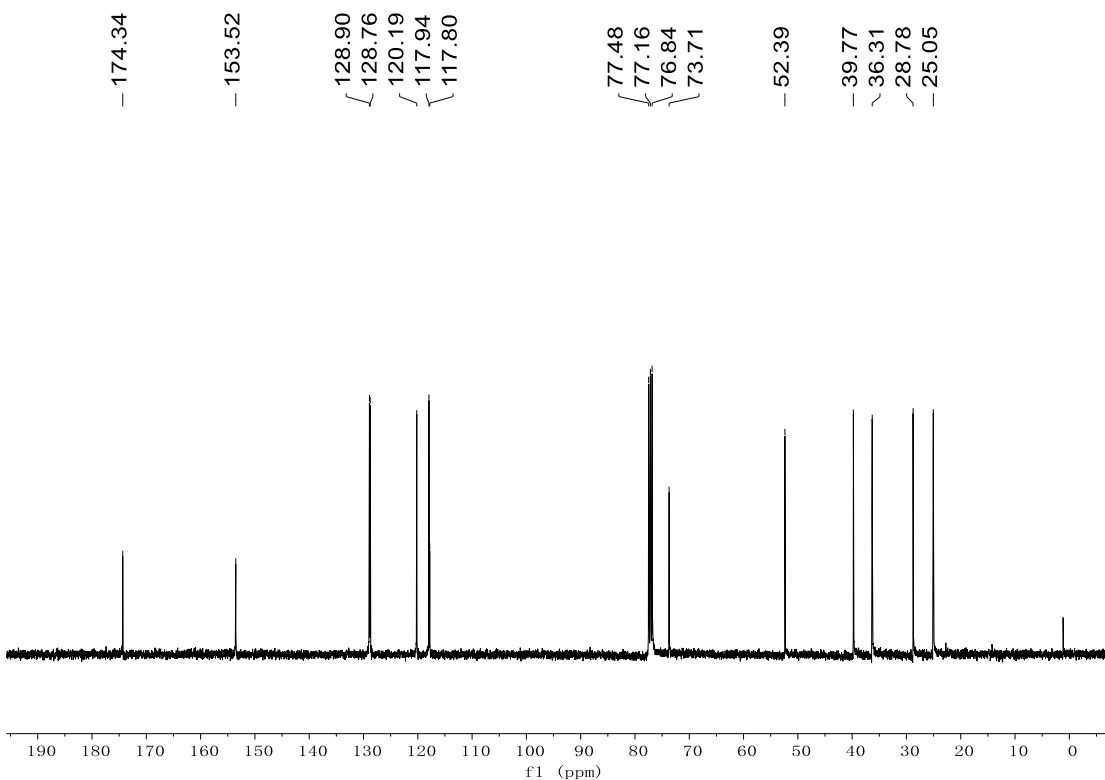

27

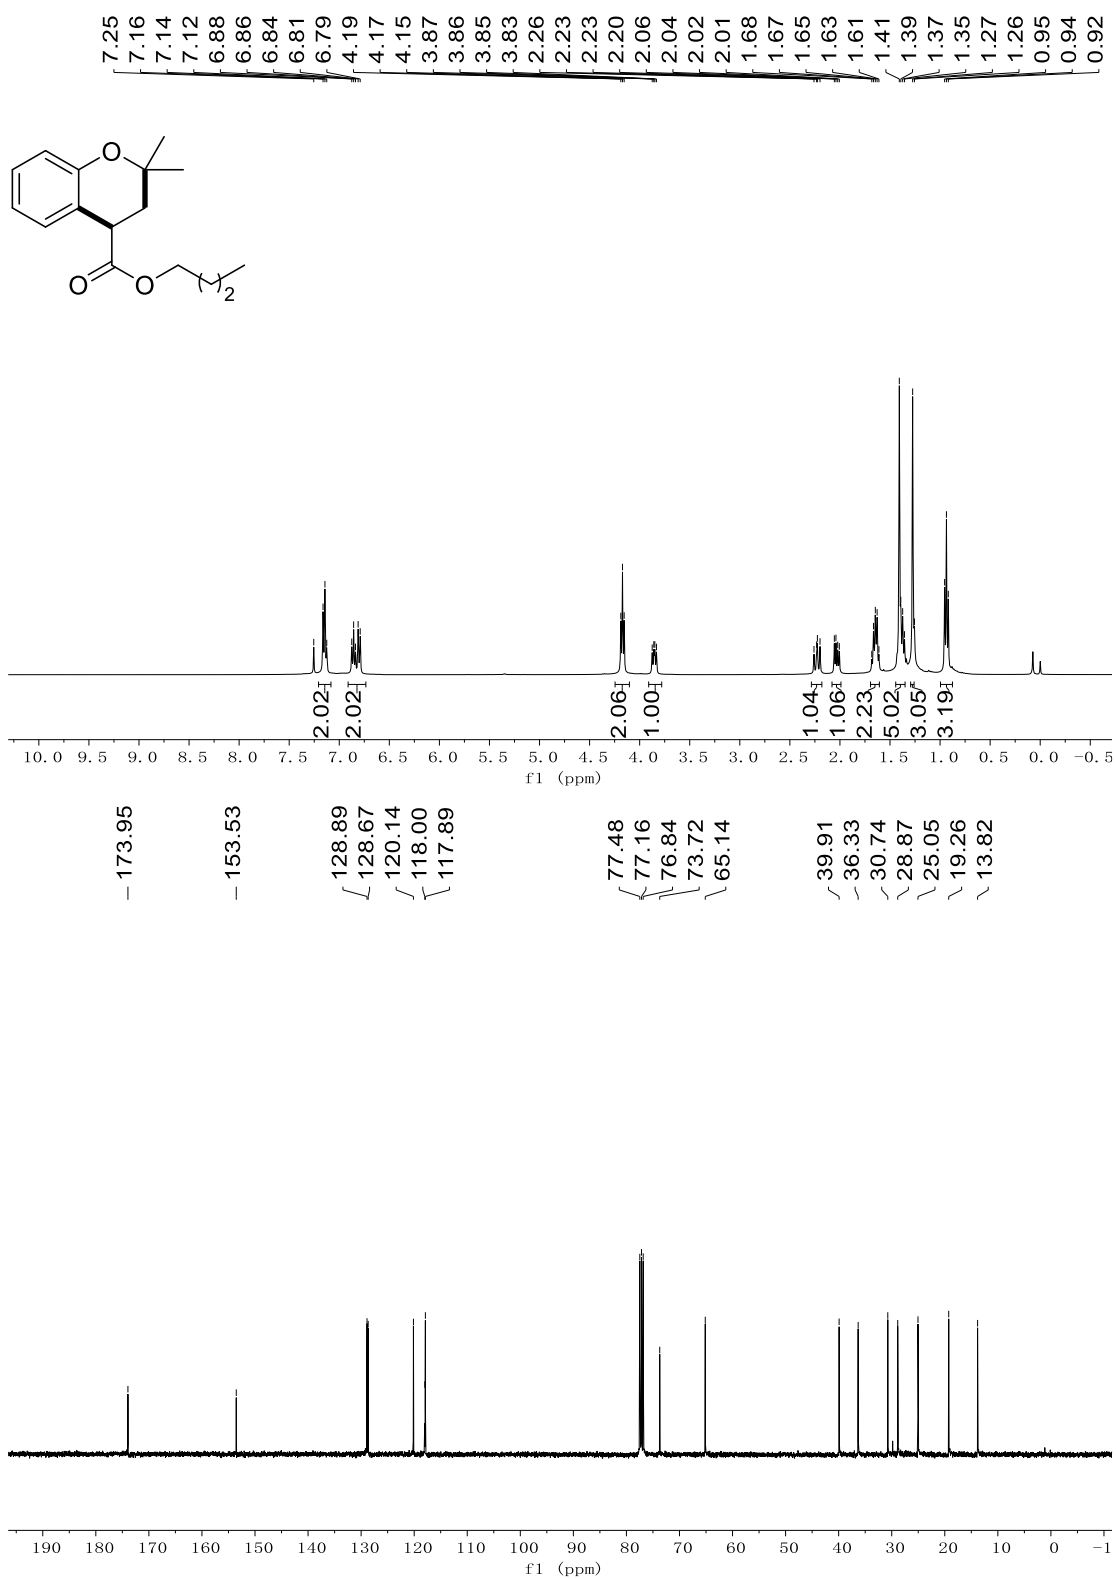

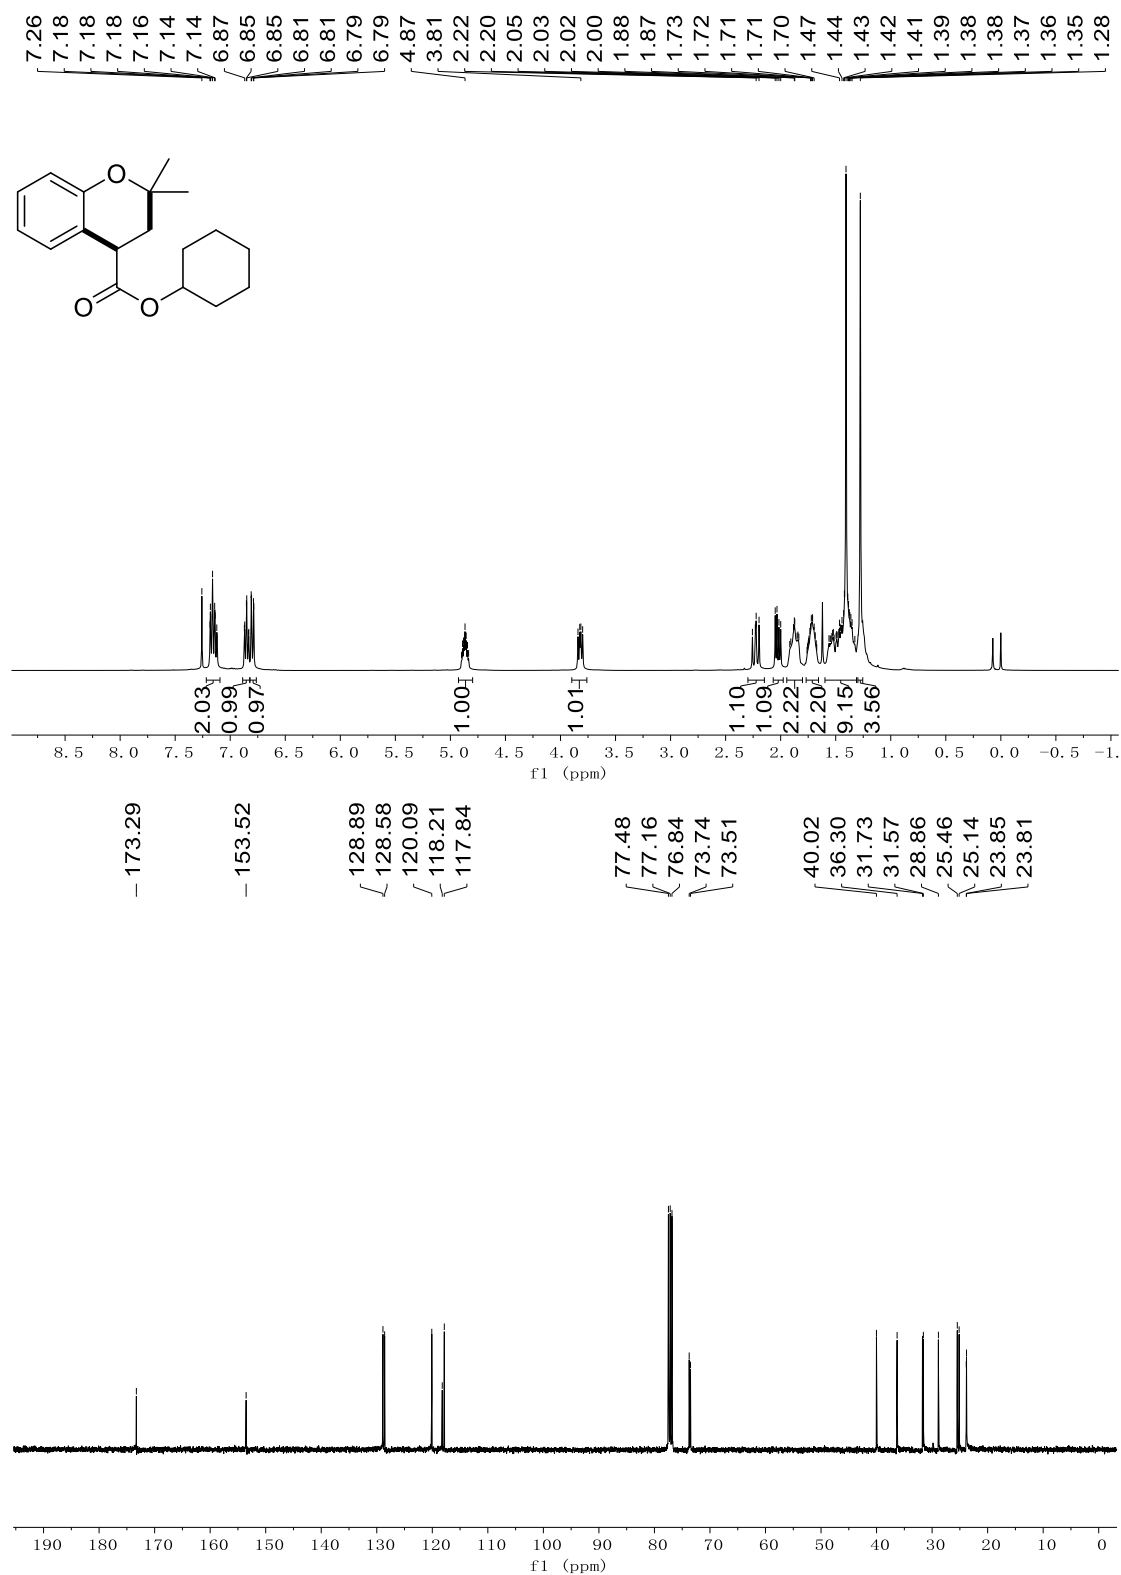

29

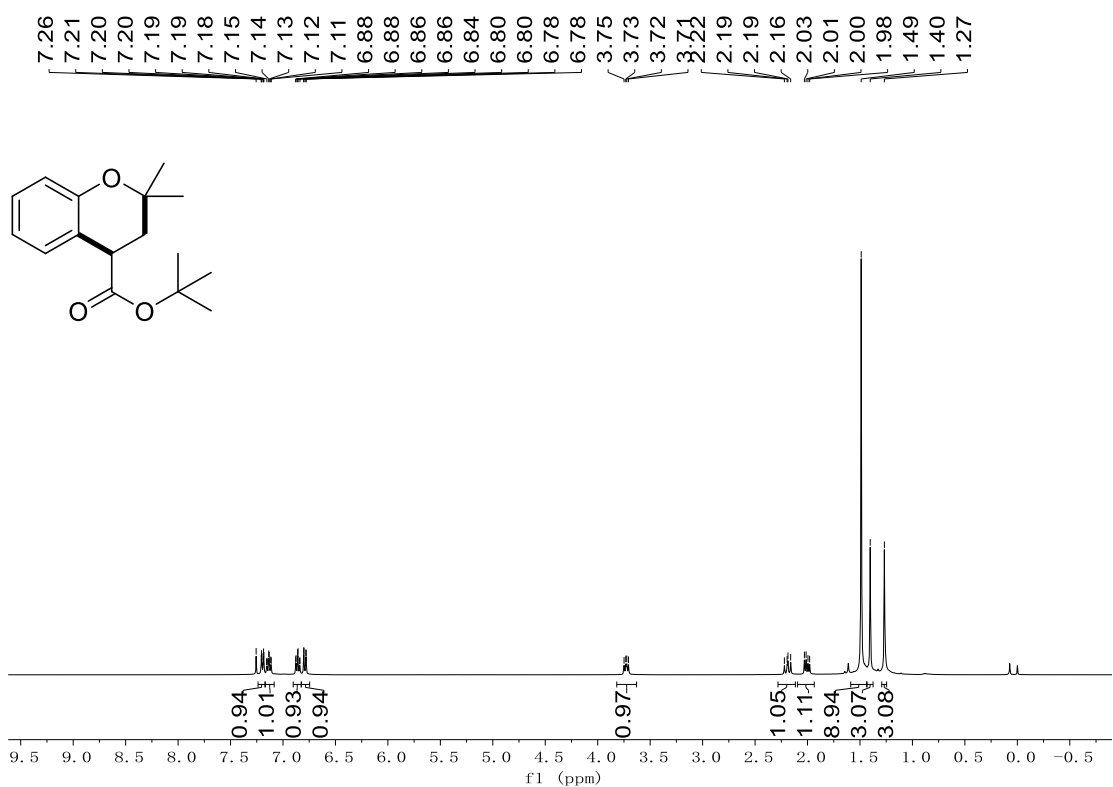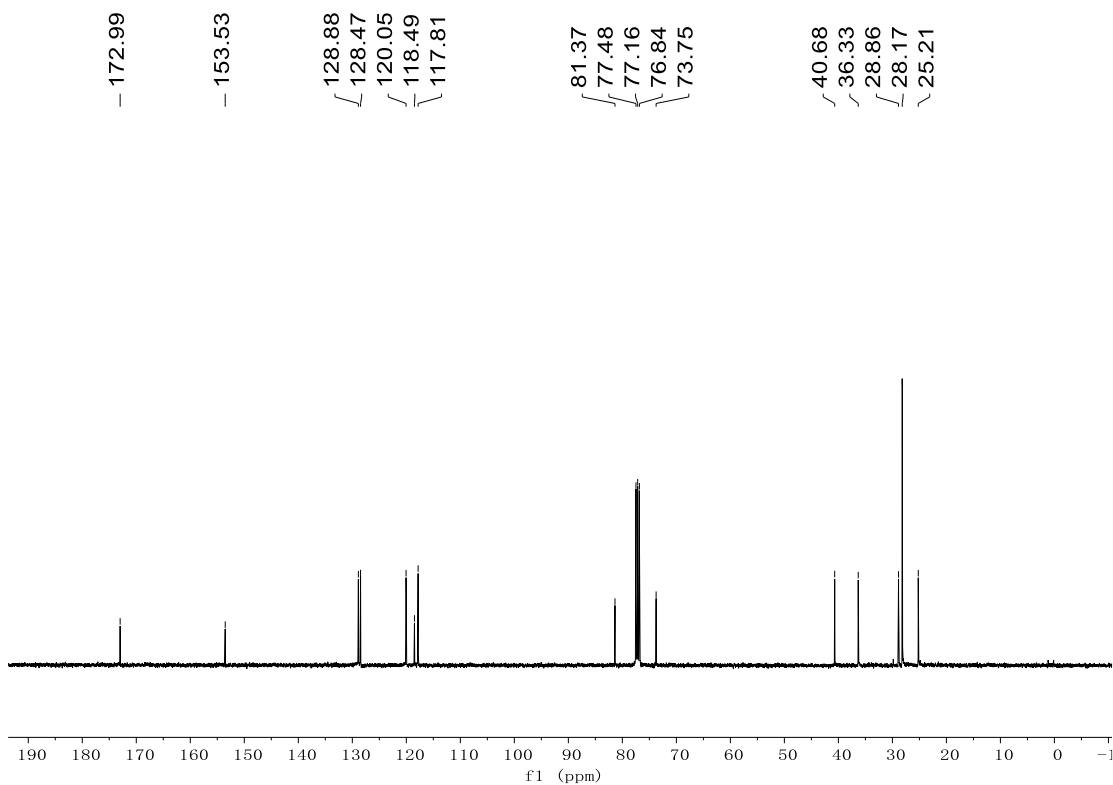

30

7.41  
7.41  
7.39  
7.38  
7.37  
7.34  
7.34  
7.33  
7.32  
7.26  
7.24  
7.22  
7.22  
7.19  
7.18  
7.17  
7.12  
7.11  
7.11  
7.10  
7.09  
6.94  
6.94  
6.92  
6.92  
6.86  
6.86  
6.84  
6.84  
4.11  
4.10  
4.08  
2.40  
2.39  
2.37  
2.23  
2.22  
2.20  
2.18  
1.48  
1.34

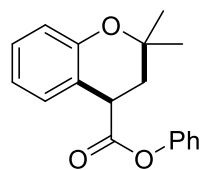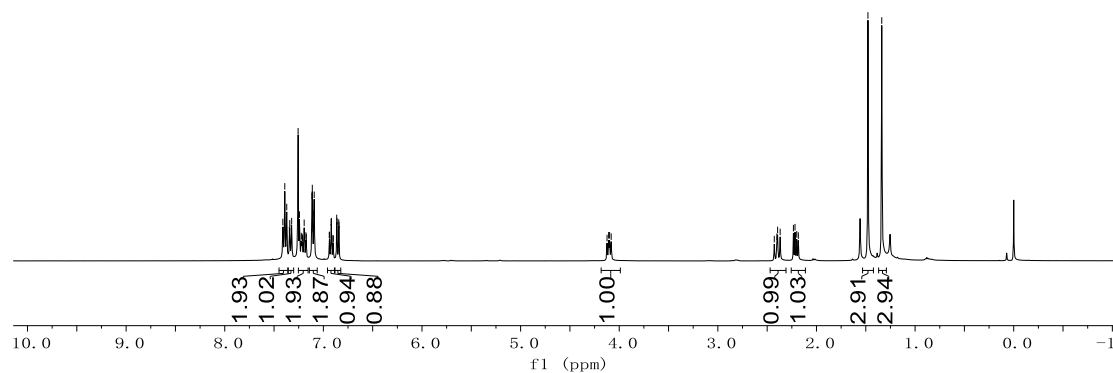

-172.41  
153.62  
150.84  
129.63  
129.02  
128.93  
126.14  
121.48  
120.40  
118.15  
117.39  
77.48  
77.16  
76.84  
73.79  
40.05  
36.27  
28.87  
25.14

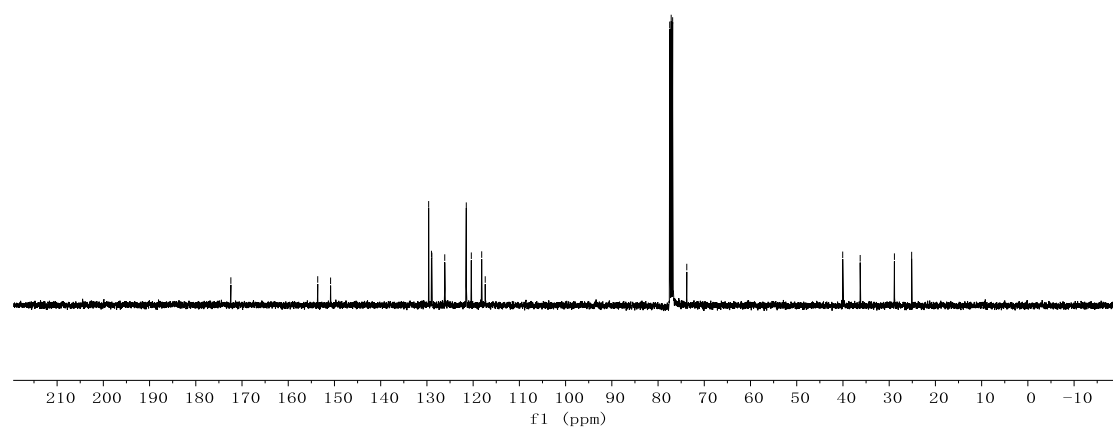



31

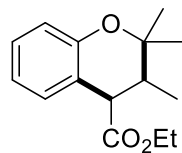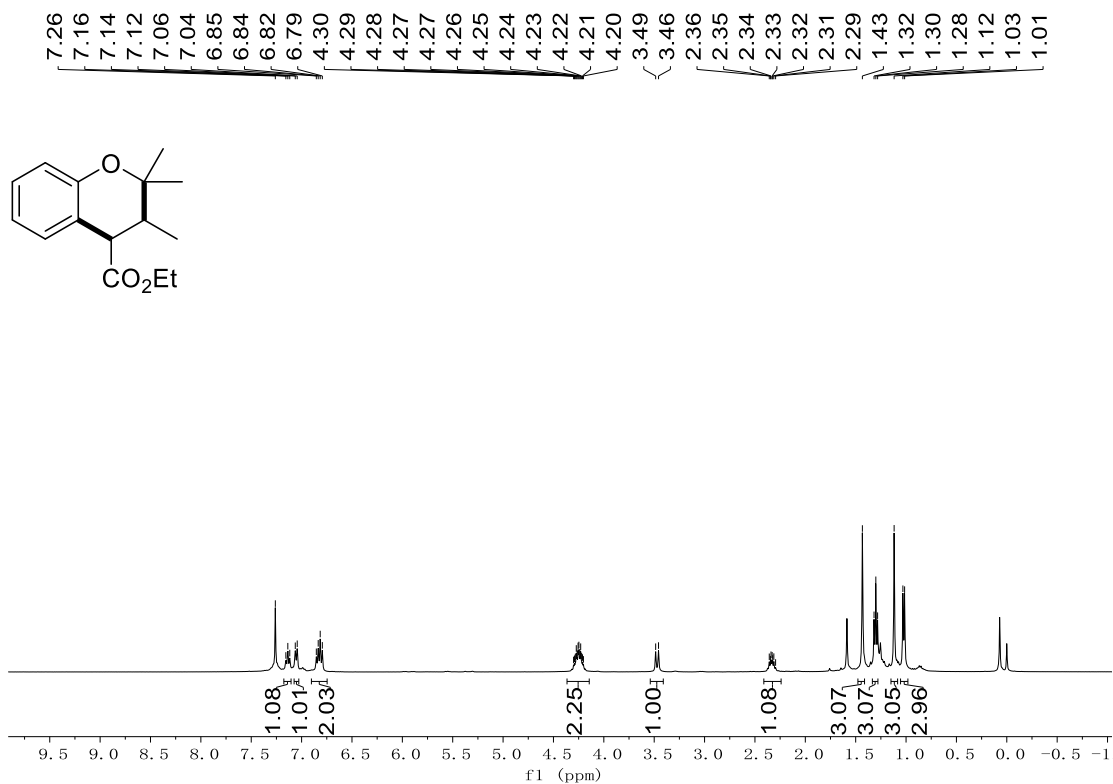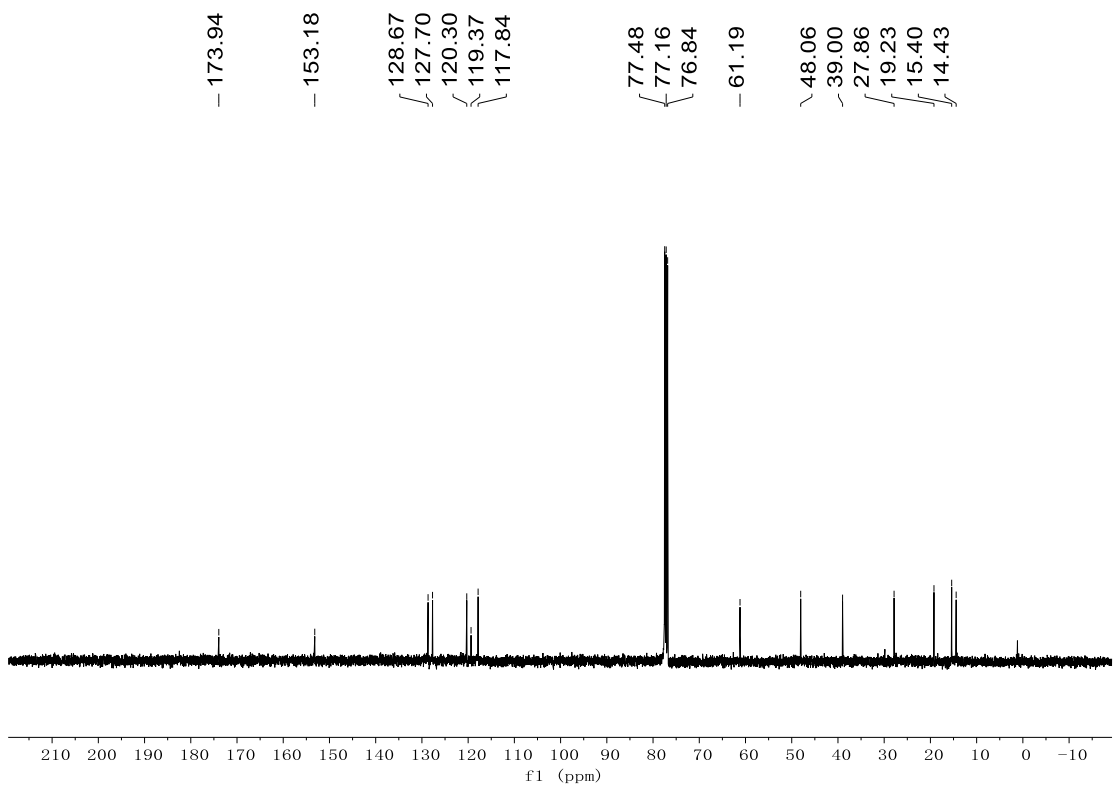

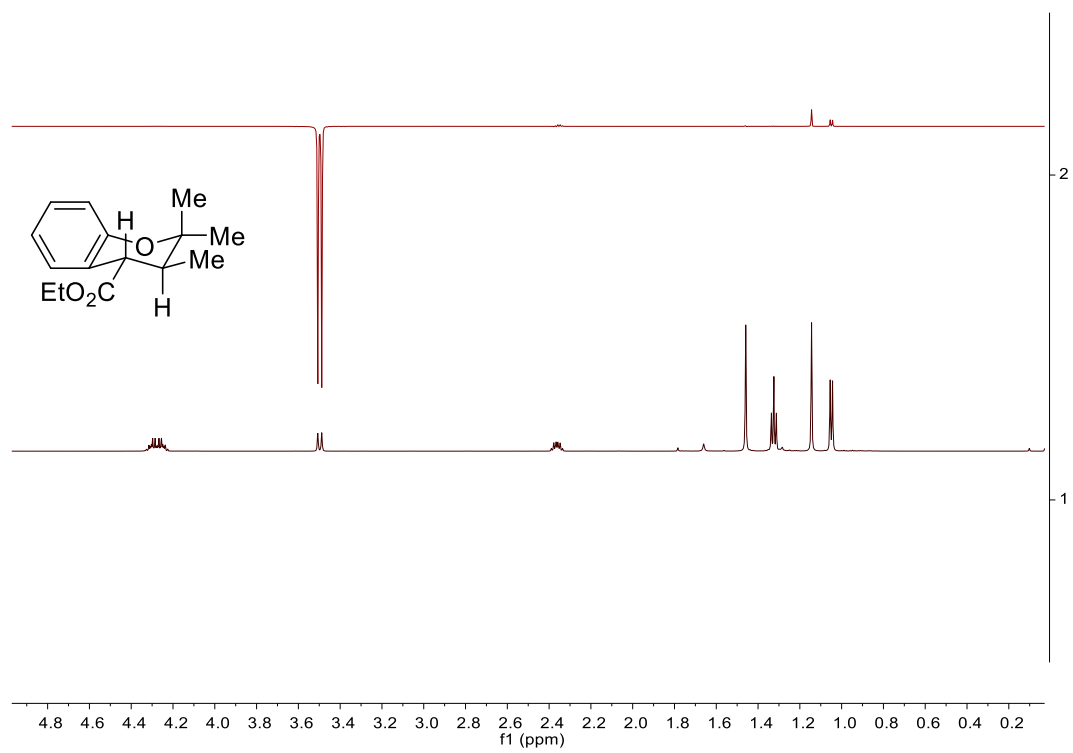

1D NOE

32

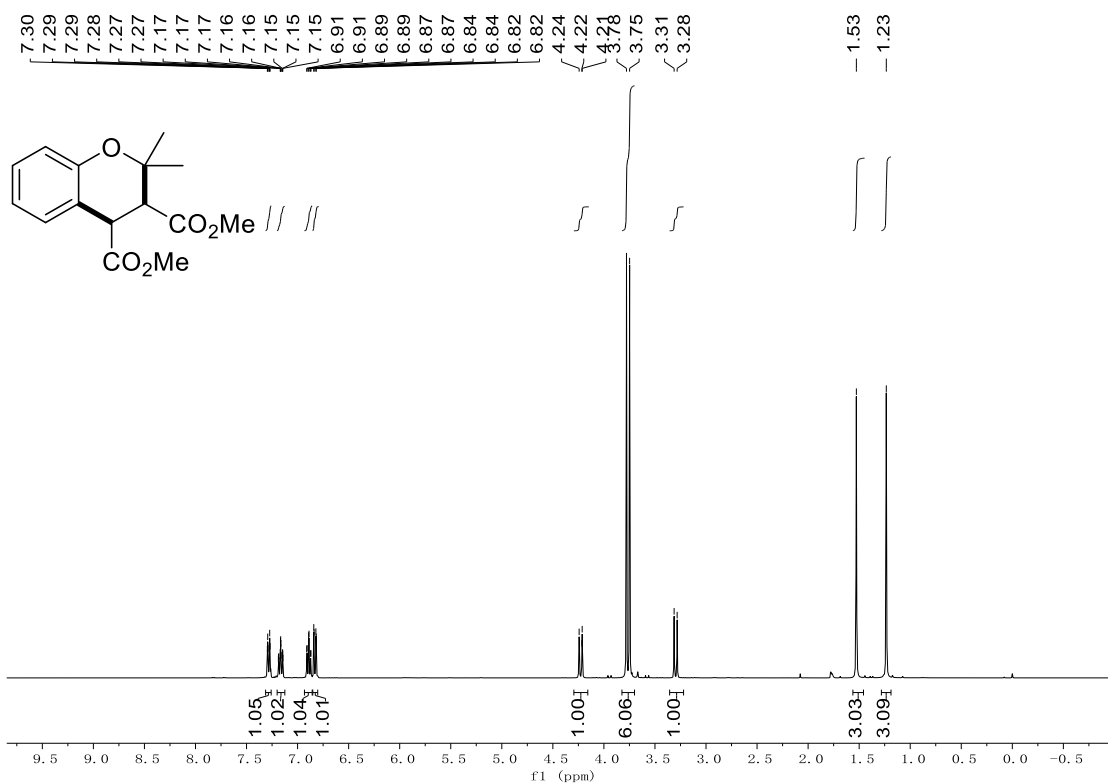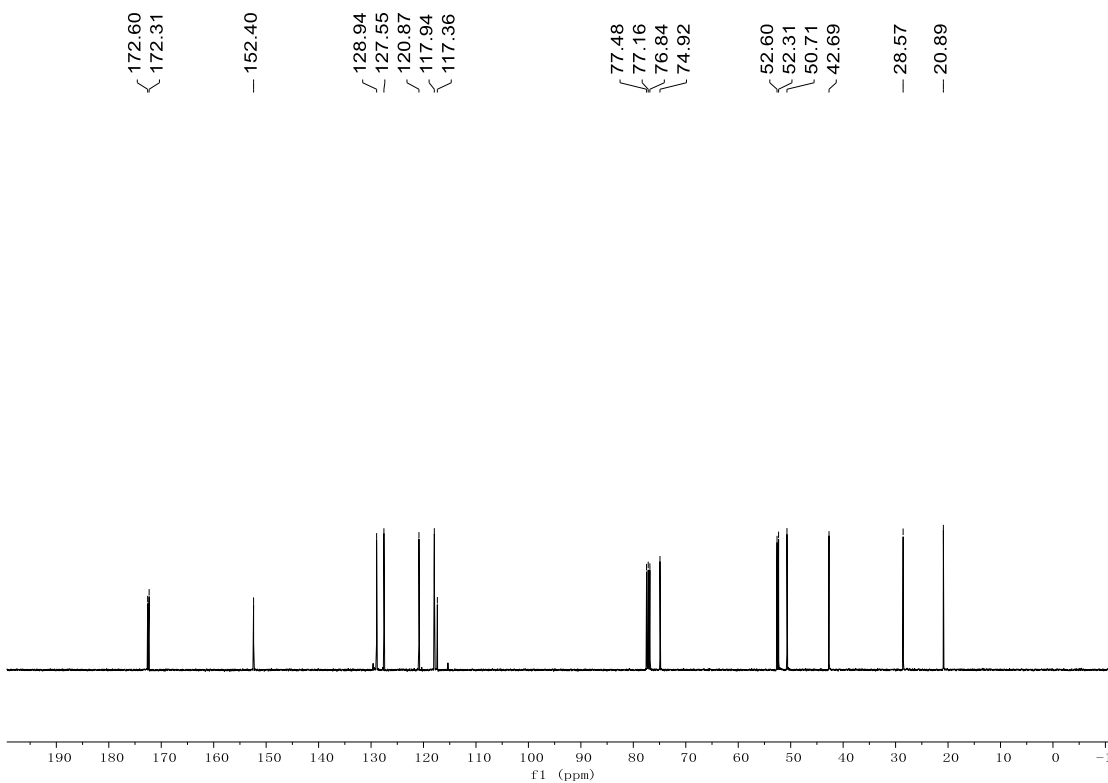

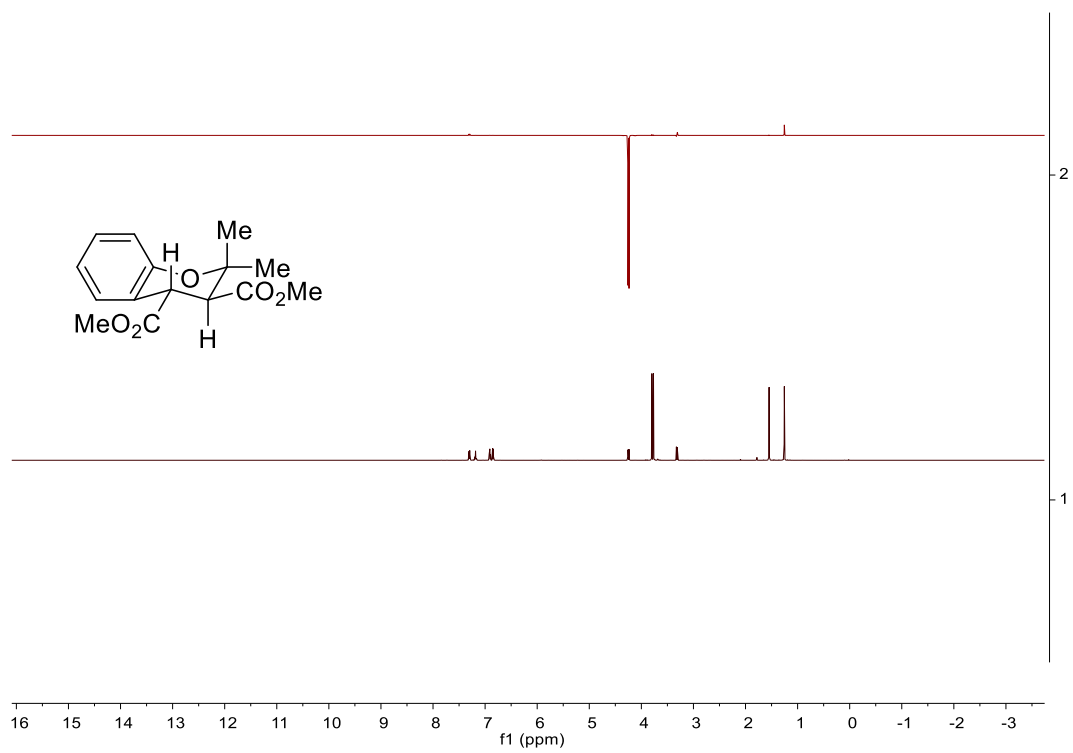

1D NOE

33

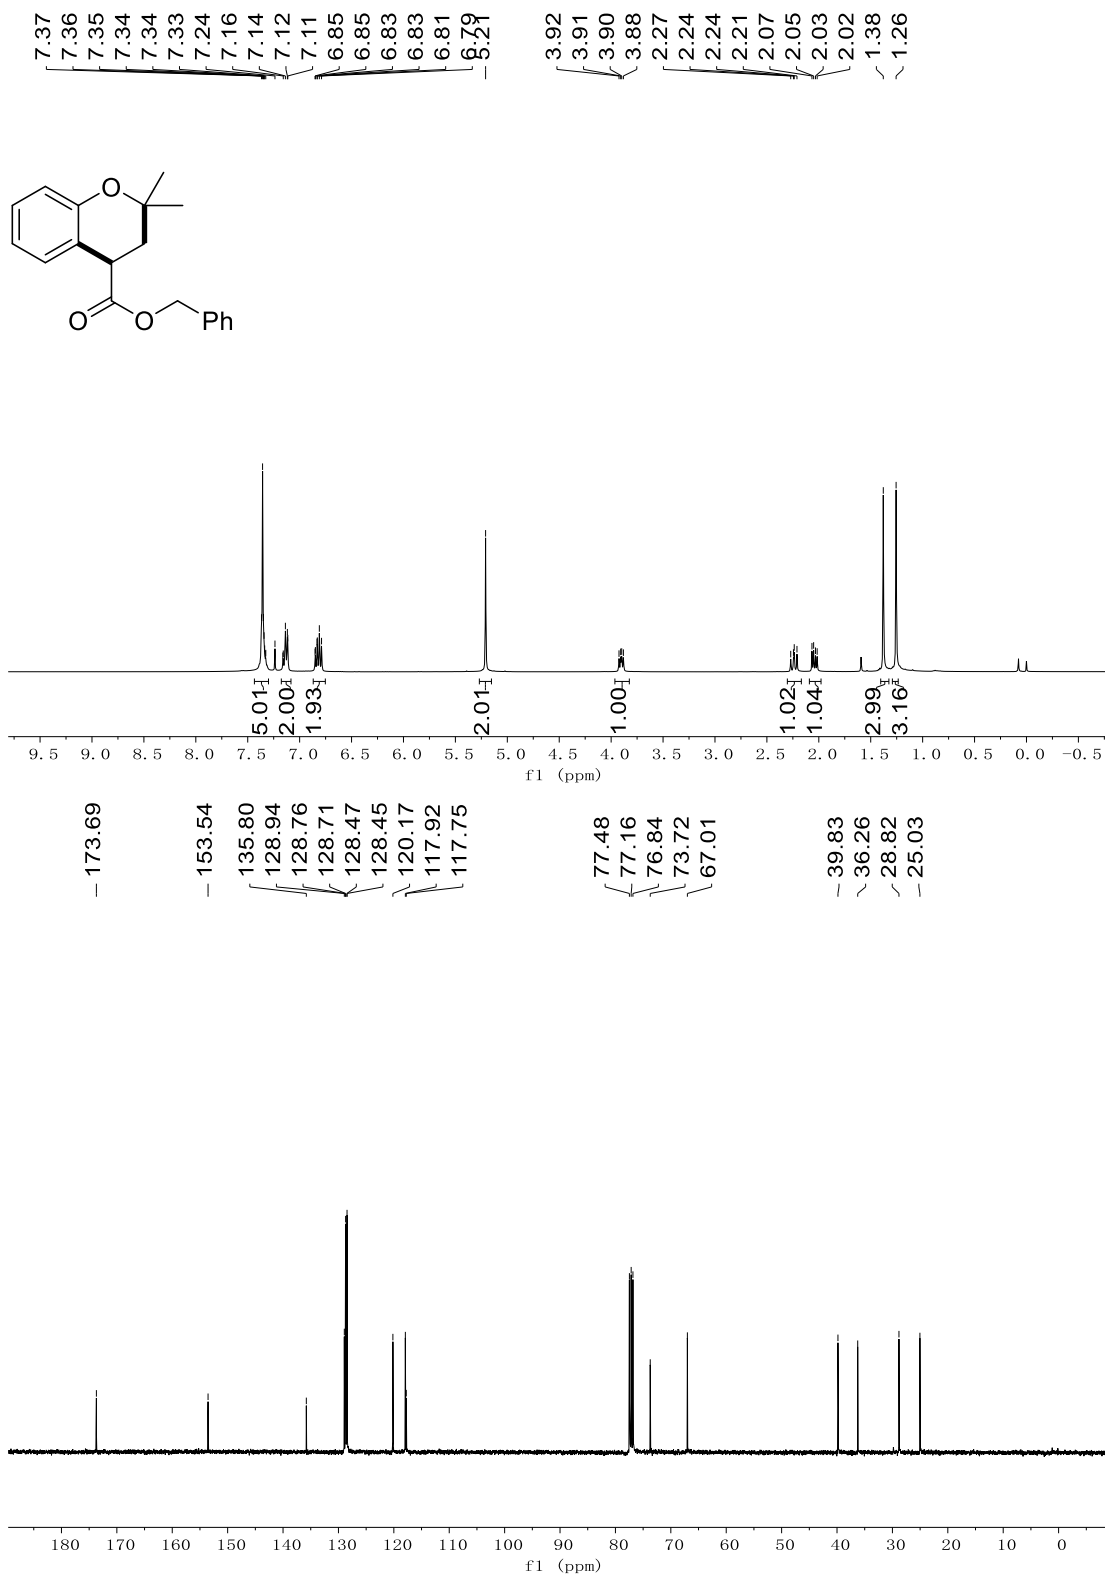

34

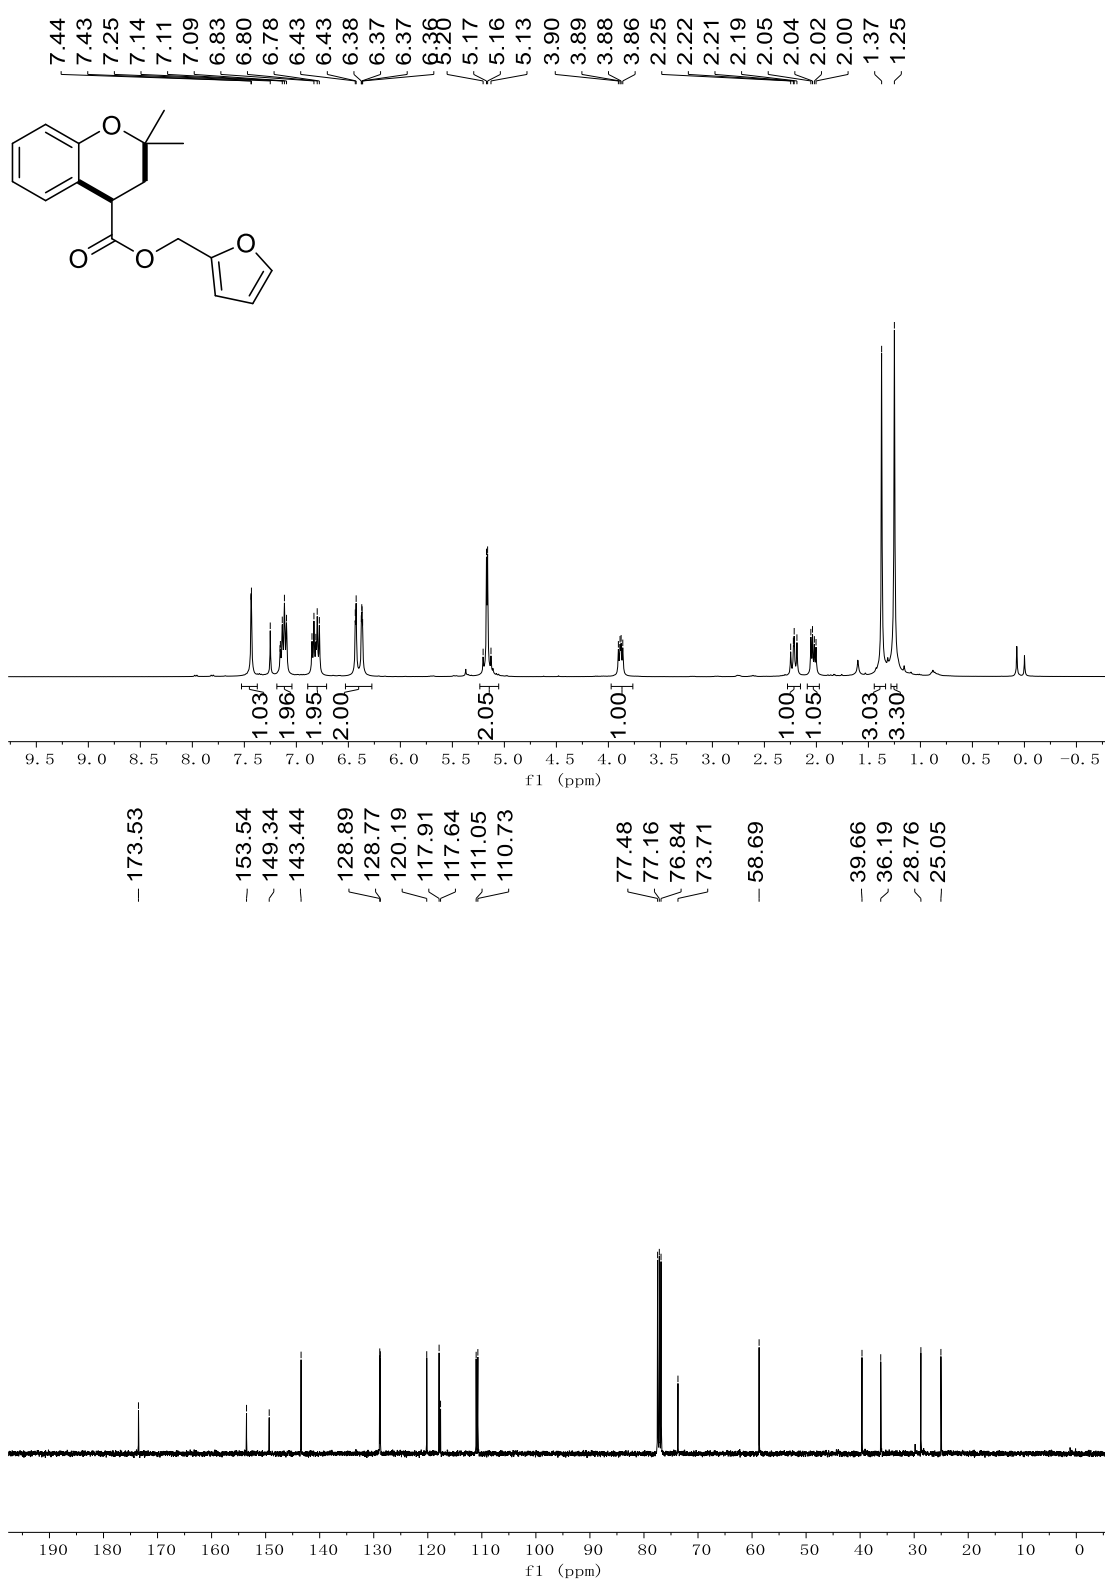

35

7.24  
7.17  
7.17  
7.16  
7.15  
7.14  
7.14  
7.08  
7.07  
7.06  
7.06  
7.06  
6.95  
6.94  
6.93  
6.93  
6.84  
6.83  
6.83  
6.82  
6.81  
6.81  
6.80  
6.79  
6.79  
4.42  
4.41  
4.40  
4.39  
4.38  
4.37  
3.21  
3.19  
3.17  
2.21  
2.19  
2.03  
2.02  
1.37  
1.26

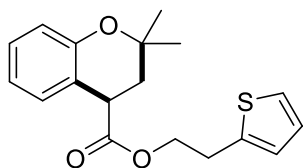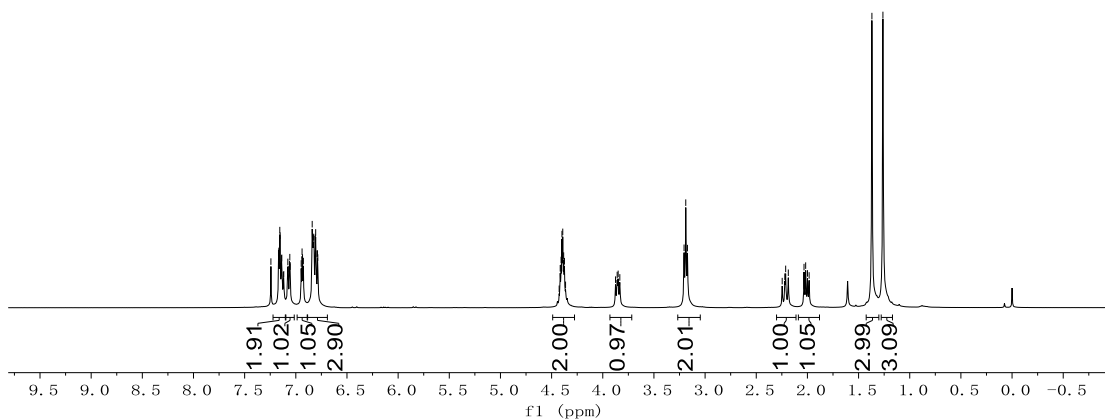

-173.72  
-153.53  
139.80  
129.02  
128.72  
127.02  
125.82  
124.18  
120.20  
117.90  
117.70  
77.48  
77.16  
76.84  
73.70  
65.41  
39.79  
36.22  
29.35  
28.68  
25.13

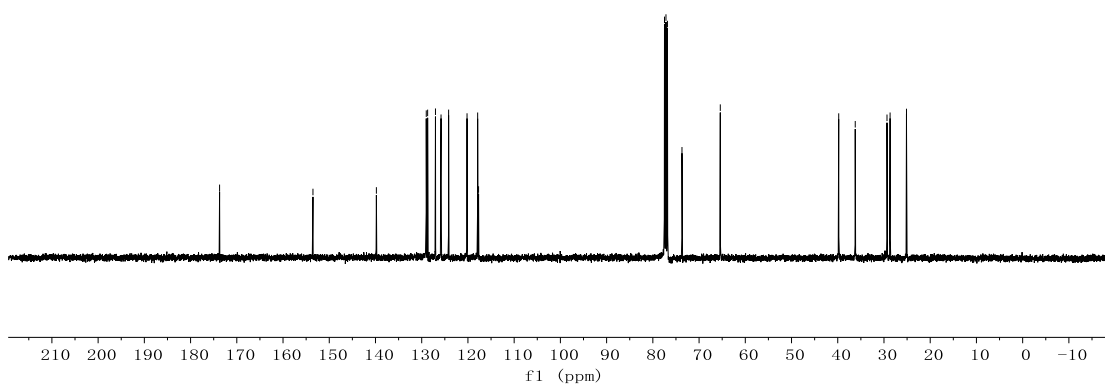

36

7.26  
7.19  
7.19  
7.19  
7.18  
7.17  
7.17  
7.15  
7.15  
7.14  
7.14  
6.88  
6.87  
6.86  
6.86  
6.81  
6.81  
6.79  
6.79  
4.36  
4.35  
4.35  
4.34  
4.34  
4.33  
4.33  
4.32  
3.92  
3.91  
3.64  
3.63  
3.62  
3.39  
2.23  
2.20  
2.08  
2.06  
2.04  
2.03  
1.41  
1.27

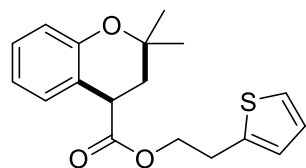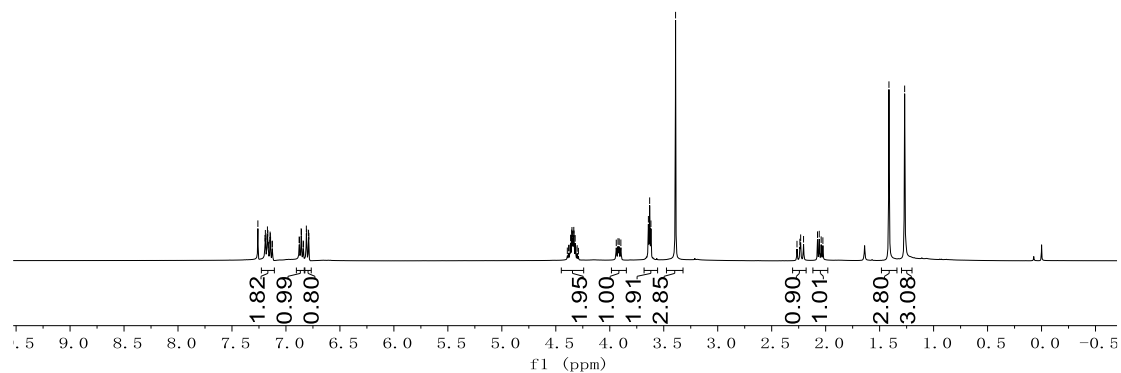

-173.92  
-153.57  
128.85  
128.73  
120.19  
117.91  
117.84  
77.48  
77.16  
76.84  
73.72  
70.49  
64.12  
59.08  
39.67  
36.28  
28.93  
24.96

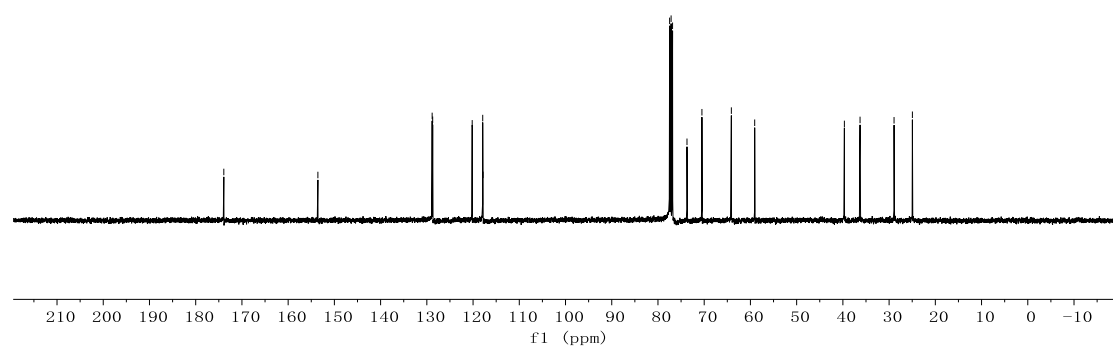



37

7.28  
7.20  
7.20  
7.20  
7.18  
7.18  
7.18  
7.14  
7.14  
6.87  
6.86  
6.85  
6.81  
6.80  
6.79  
6.78  
4.37  
4.35  
4.34  
4.33  
4.32  
3.91  
3.90  
3.75  
3.73  
3.72  
3.66  
3.65  
3.64  
3.64  
3.63  
3.56  
3.55  
3.55  
3.53  
3.38  
2.23  
2.07  
2.06  
1.41  
1.27

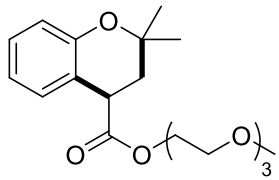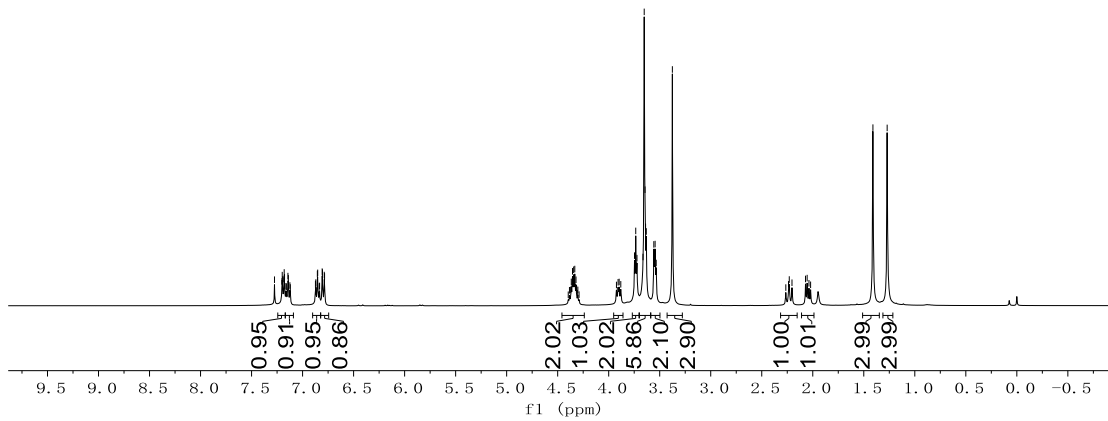

173.80  
153.50  
128.86  
128.66  
120.12  
117.84  
117.79  
77.48  
77.16  
76.84  
73.66  
71.98  
70.68  
70.64  
70.61  
69.09  
64.17  
59.11  
39.62  
36.19  
28.84  
24.95

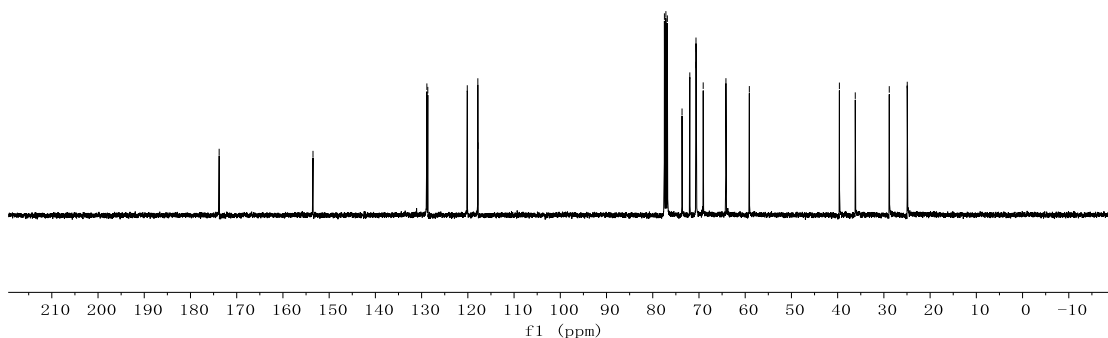

38

7.26  
7.18  
7.17  
7.16  
7.15  
7.14  
7.13  
6.88  
6.88  
6.87  
6.86  
6.82  
6.81  
6.80  
6.79  
4.29  
4.28  
4.27  
4.26  
4.26  
4.25  
4.24  
4.24  
3.84  
3.83  
3.81  
2.23  
2.22  
2.20  
2.06  
2.04  
2.02  
2.01  
1.41  
1.28  
1.06  
1.04  
1.03  
1.03  
1.01  
0.04

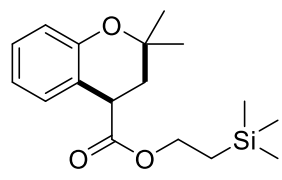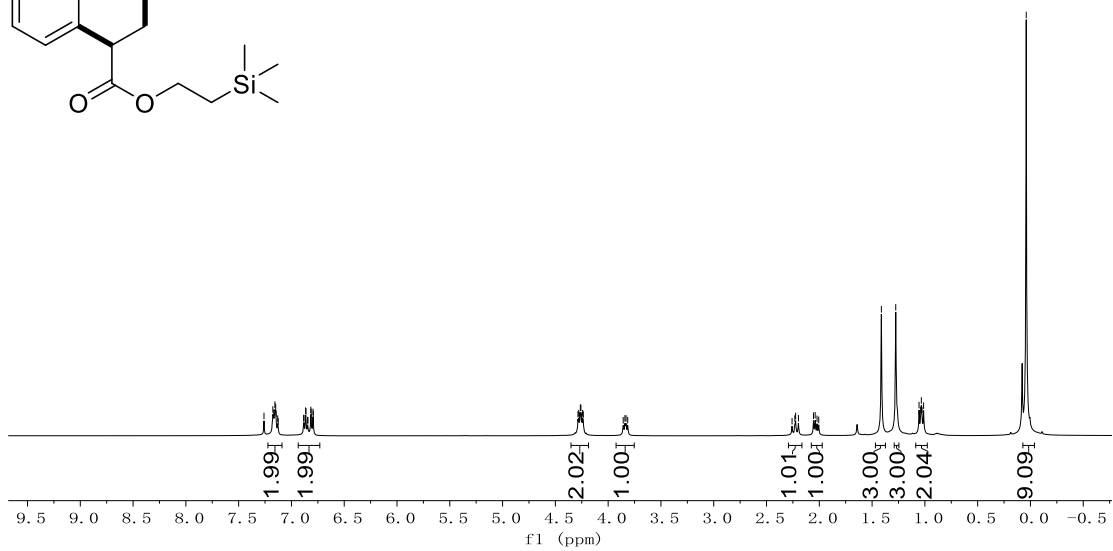

-174.02  
-153.53  
128.90  
128.65  
120.15  
118.05  
117.89  
77.48  
77.16  
76.84  
73.72  
63.58  
39.99  
36.34  
28.91  
25.03  
17.52  
-1.39

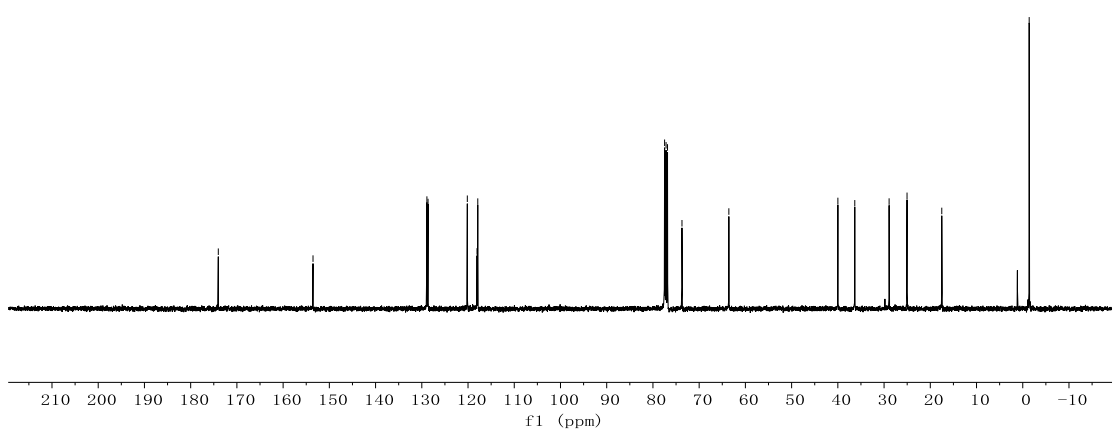

39

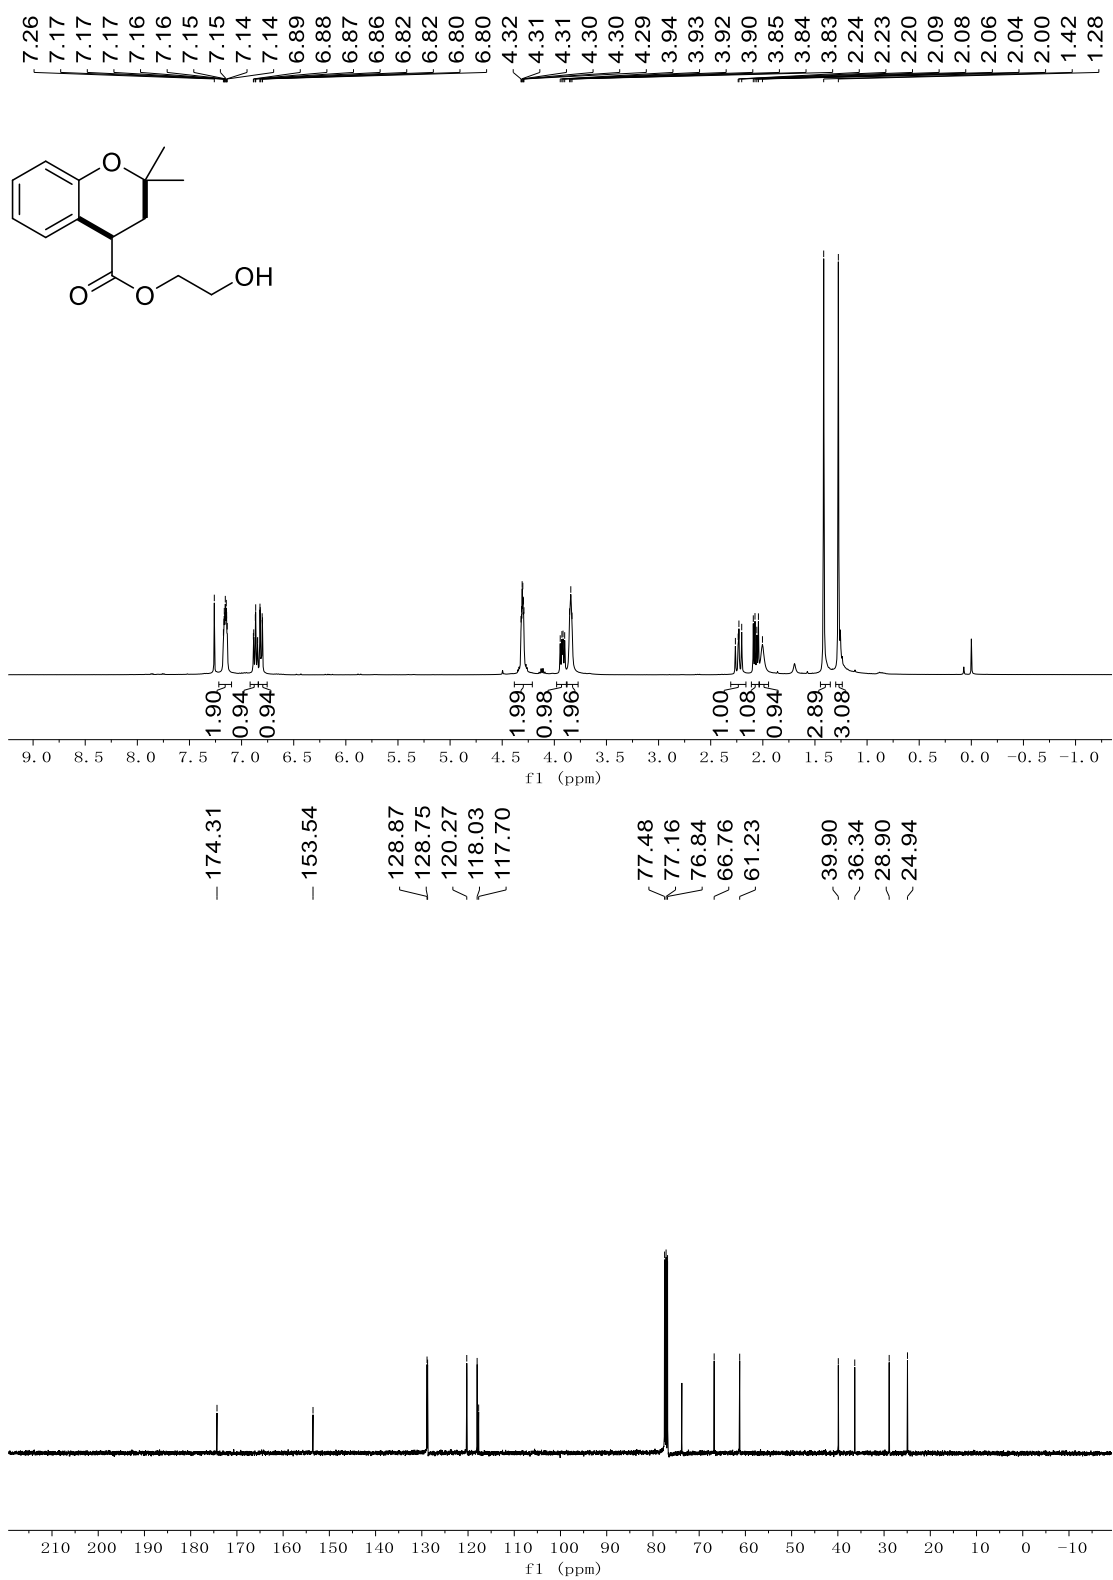

40

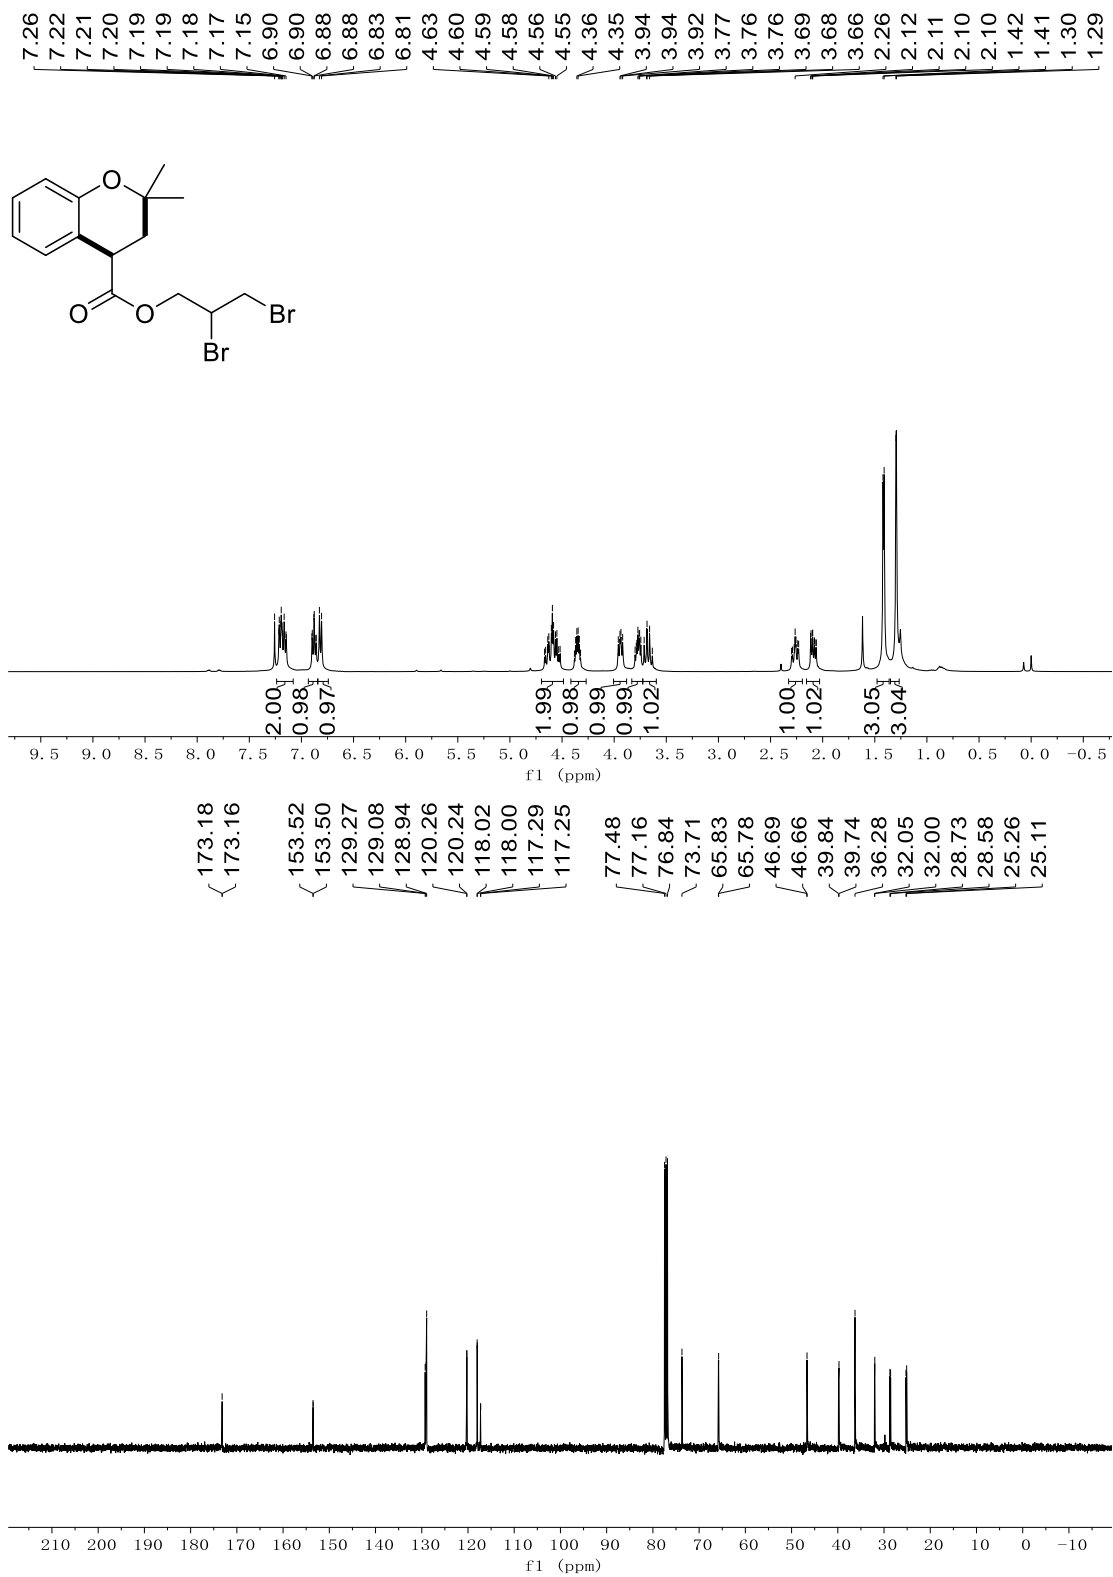

41

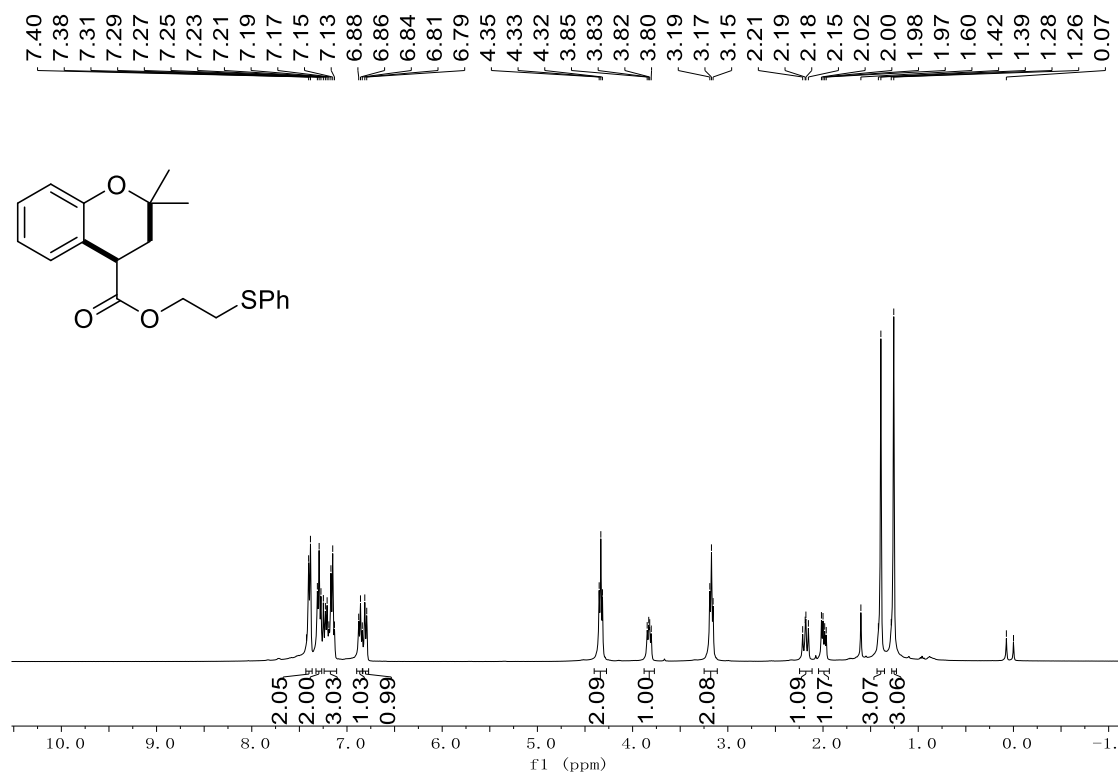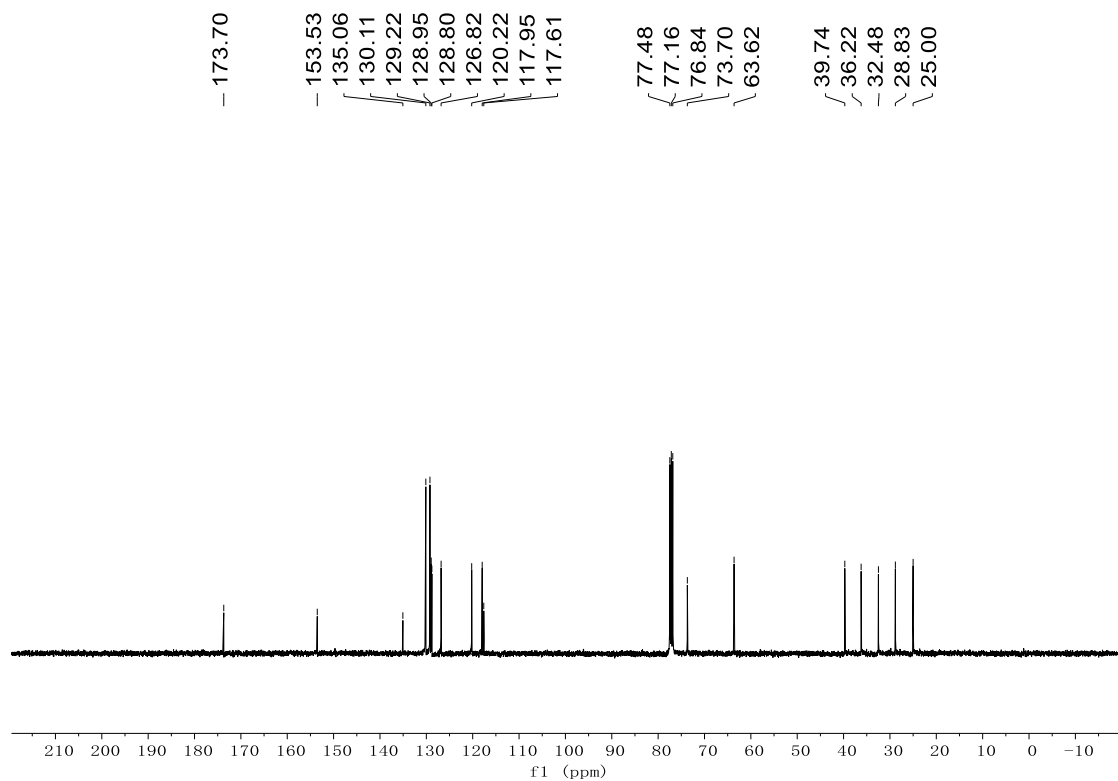

42

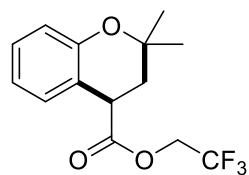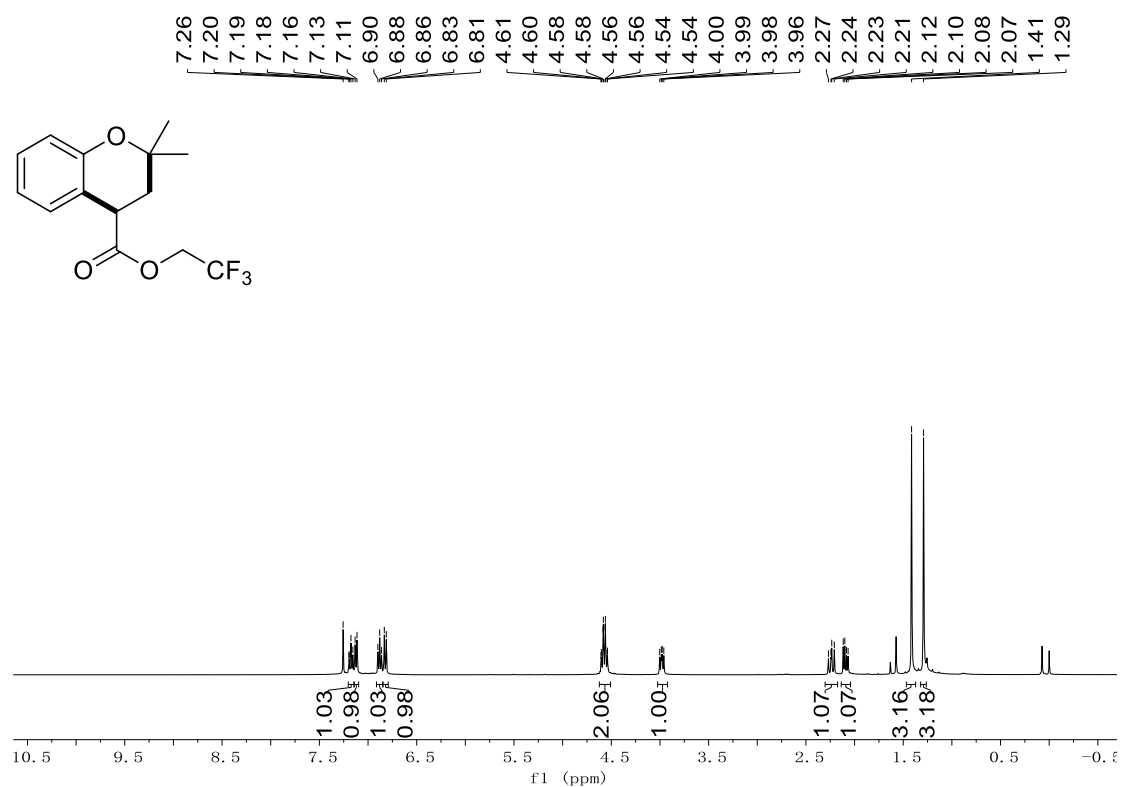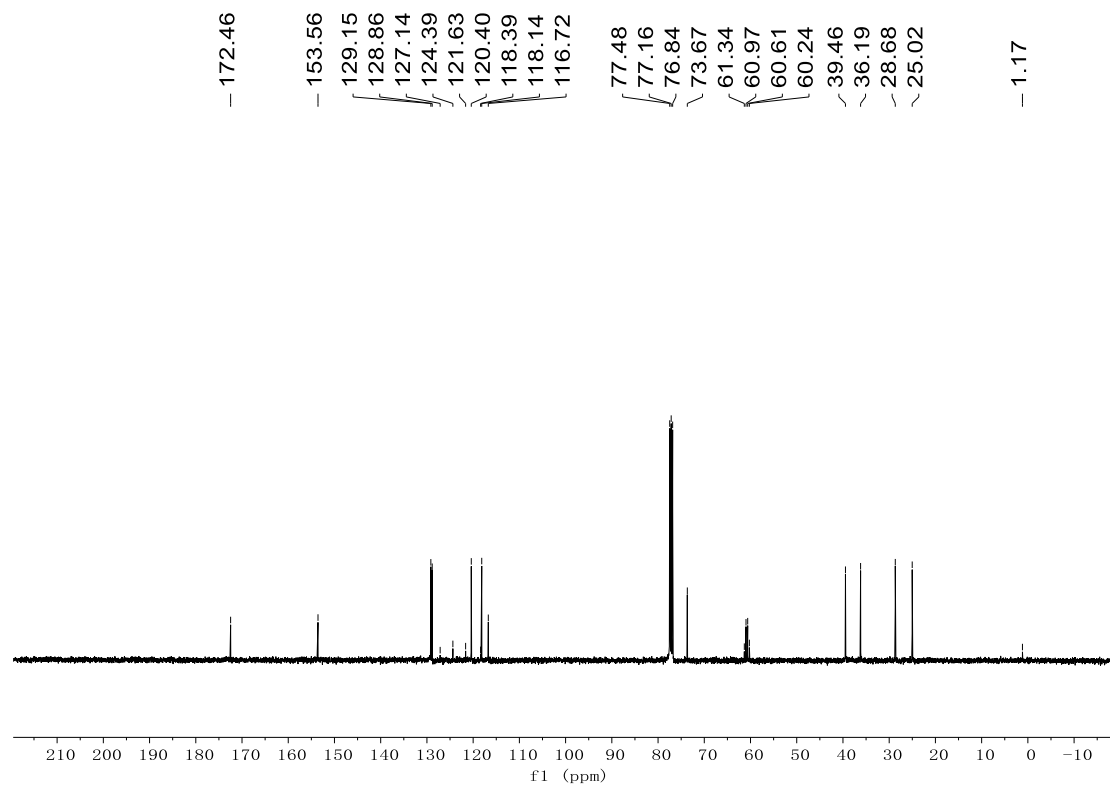

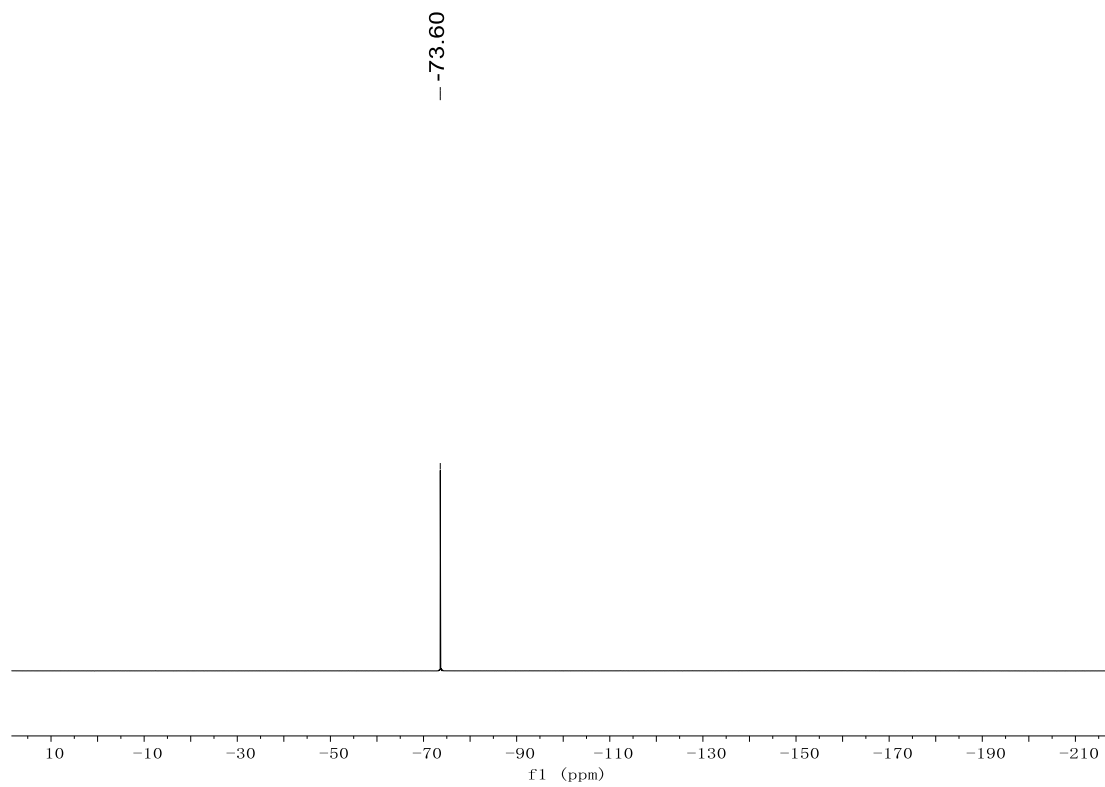

43

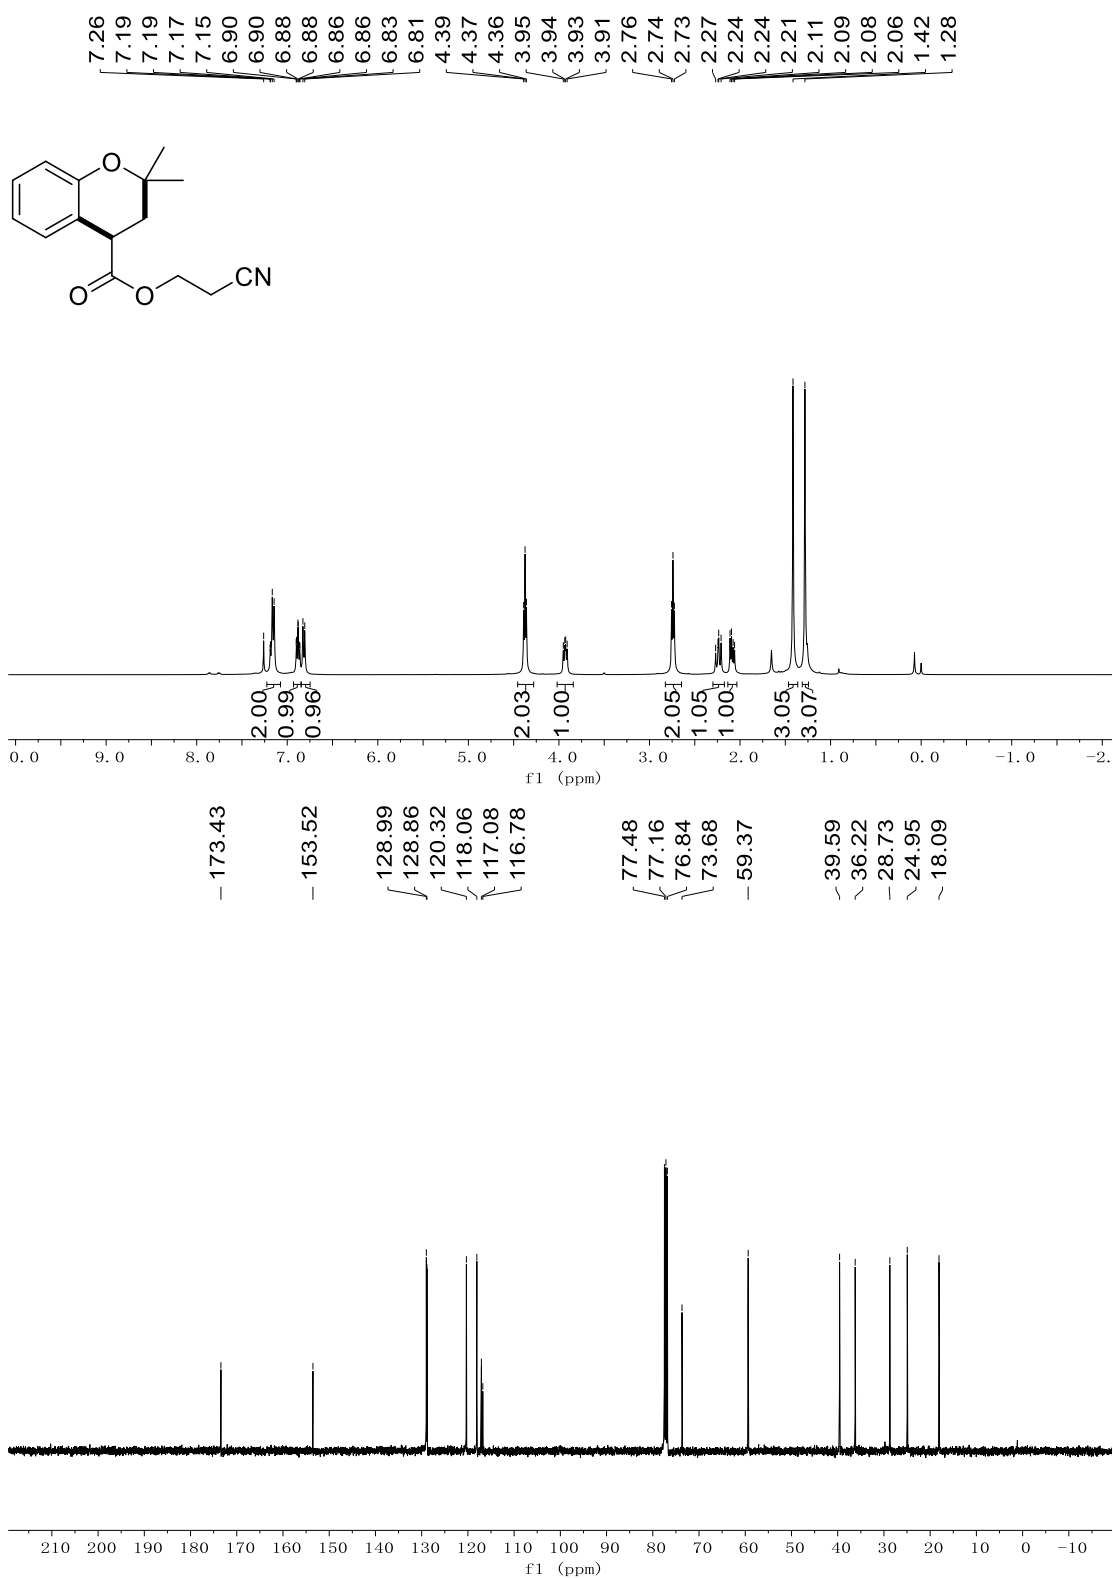



44

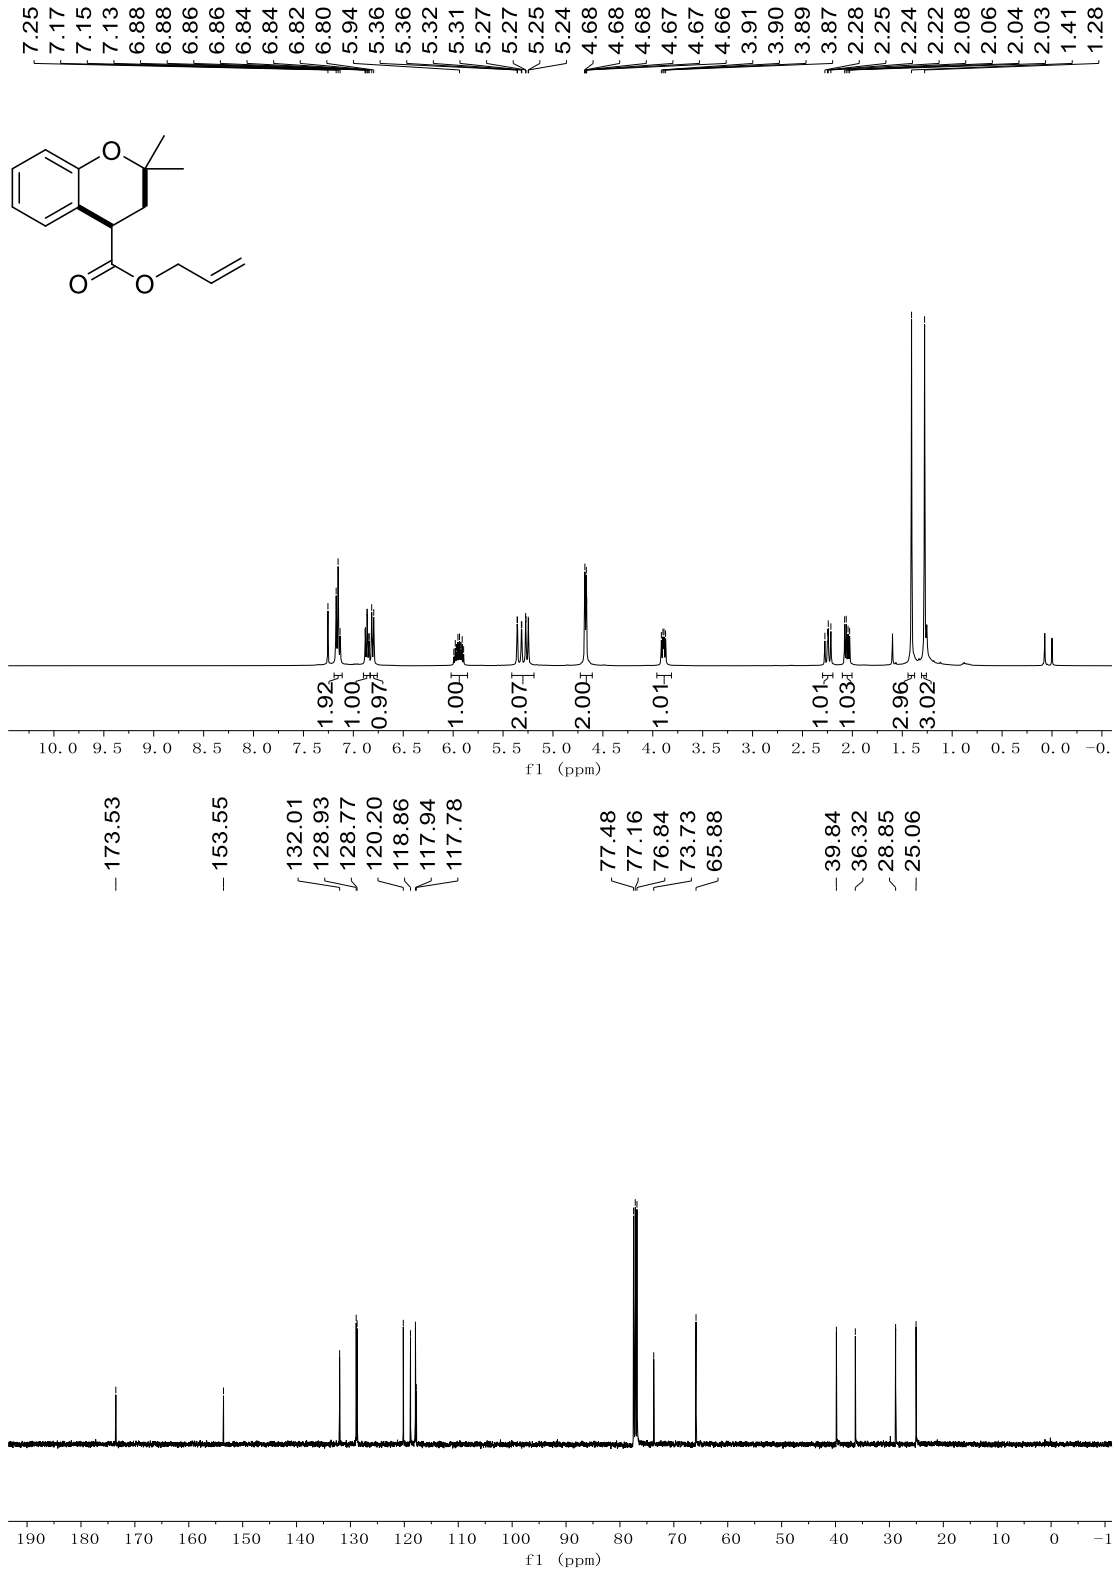

45

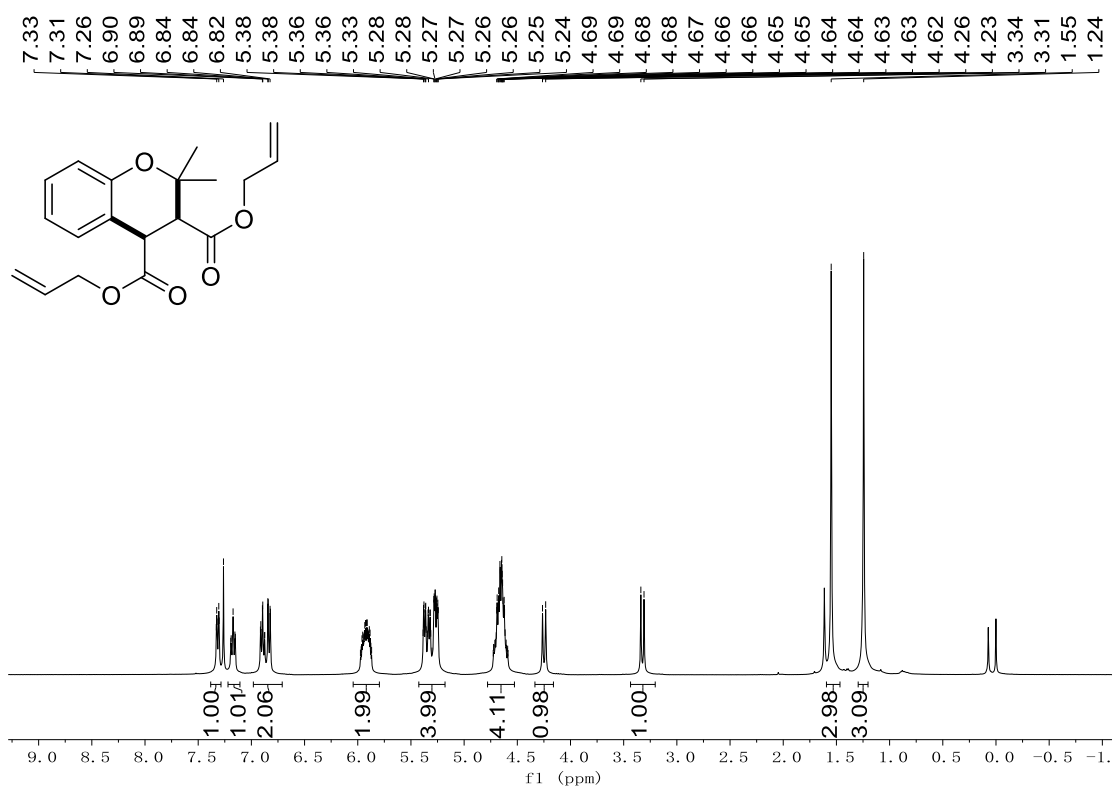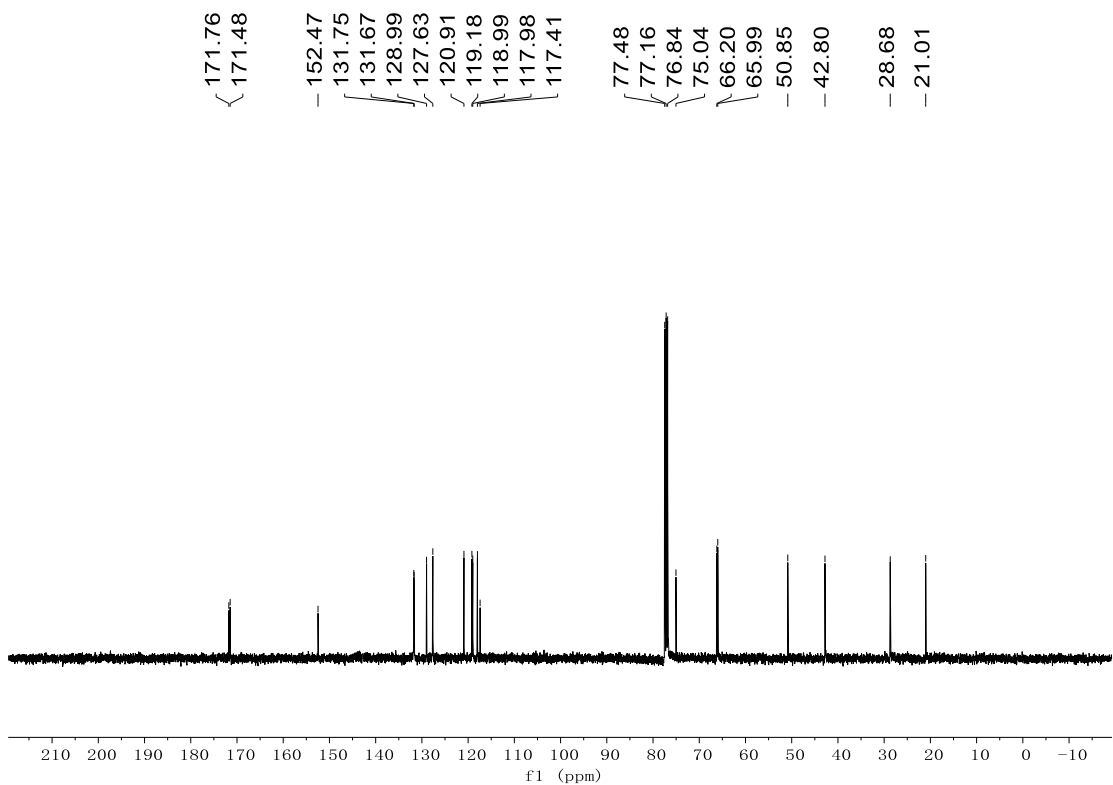

7.26  
7.22  
7.20  
7.15  
6.86  
6.85  
6.81  
6.79  
4.25  
4.25  
4.23  
4.23  
4.21  
2.55  
2.54  
2.54  
2.53  
2.53  
2.52  
2.52  
2.51  
2.50  
2.26  
2.25  
2.22  
2.18  
2.17  
2.16  
2.16  
2.15  
2.15  
2.14  
2.13  
2.07  
2.05  
2.04  
1.41  
1.28  
1.13  
1.12  
1.10

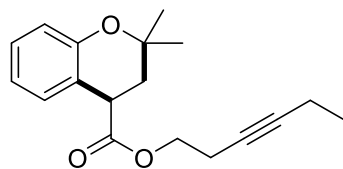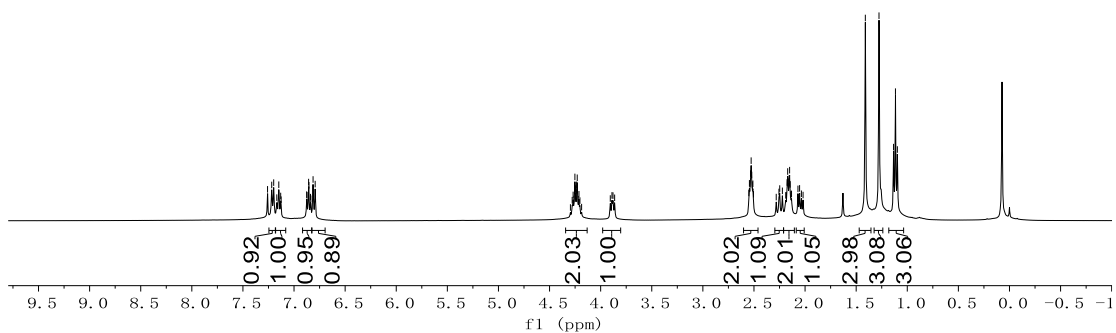

-173.68  
-153.54  
128.98  
128.73  
120.18  
117.91  
117.77  
83.67  
77.48  
77.16  
76.84  
74.93  
73.71  
63.58  
39.75  
36.29  
28.82  
25.07  
19.36  
14.23  
12.48

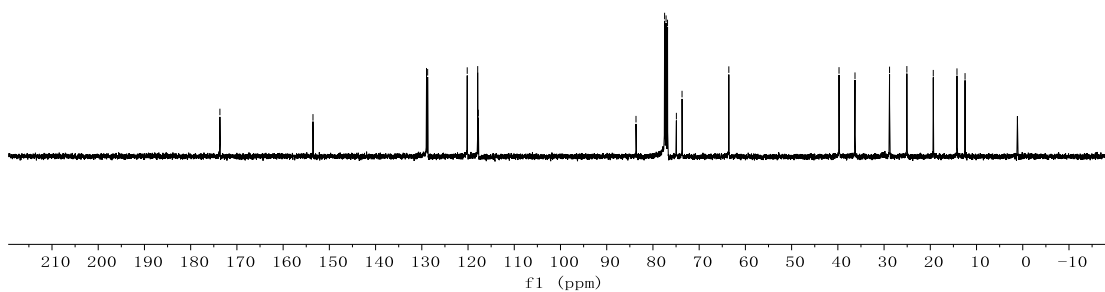

47

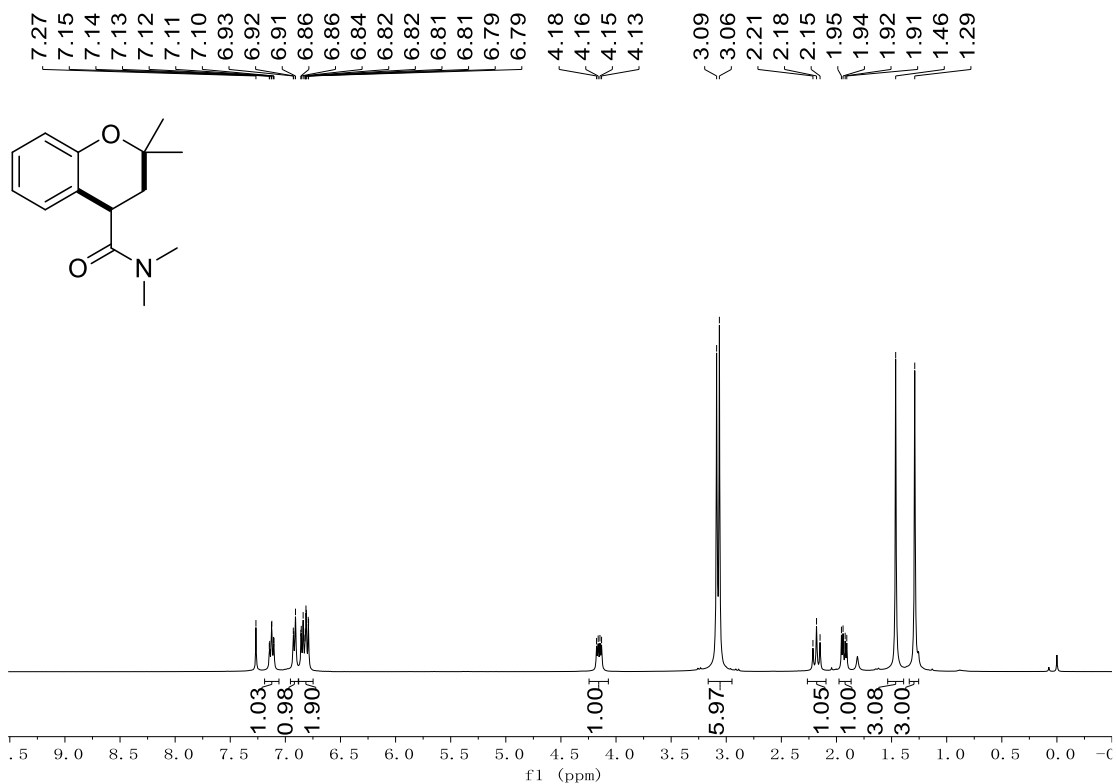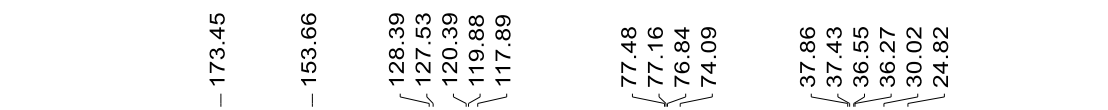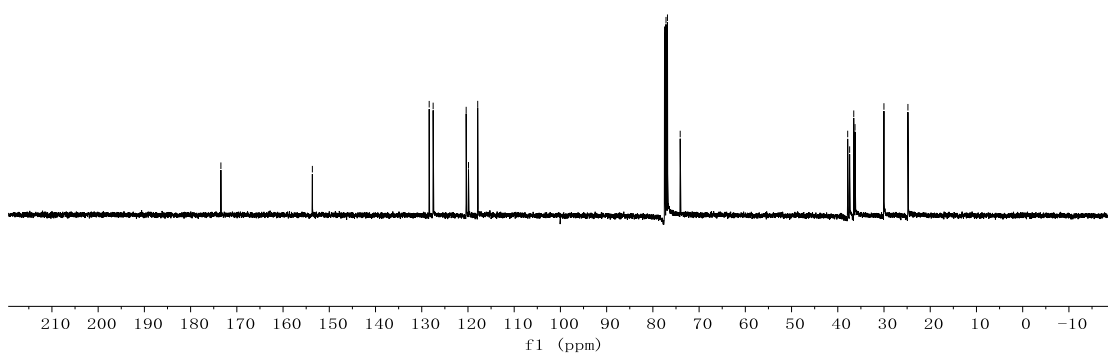

48

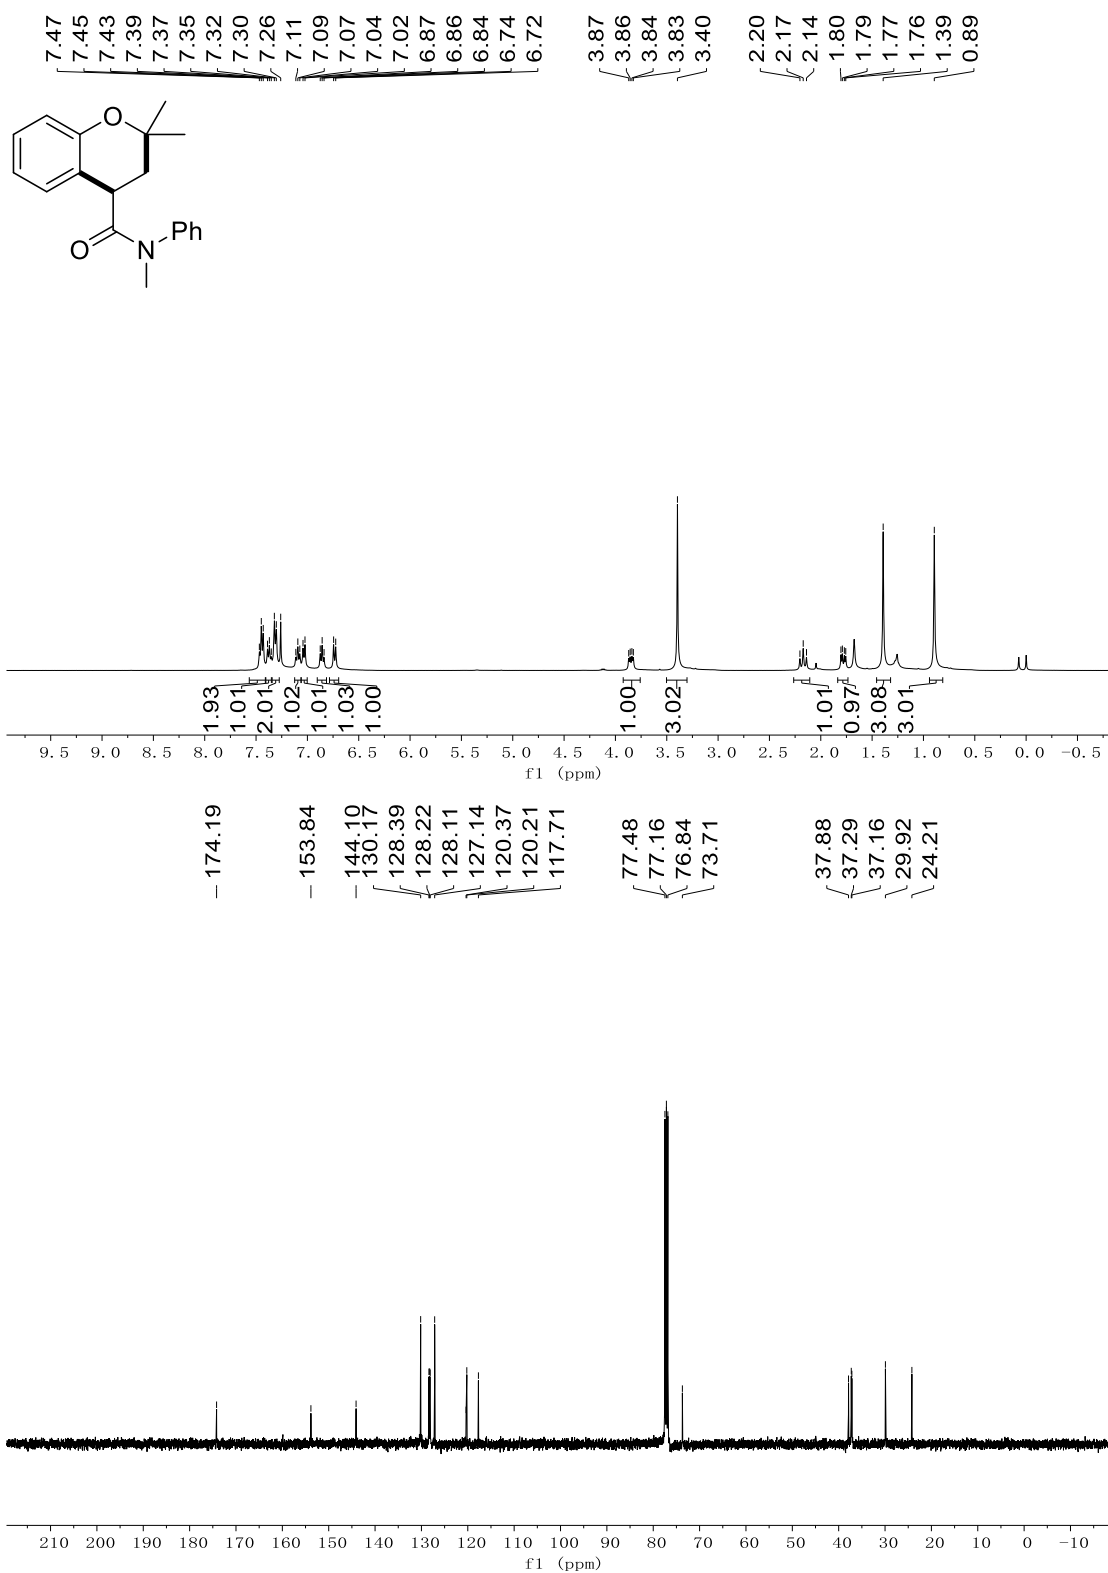

49

7.27  
7.26  
7.12  
7.10  
7.00  
6.98  
6.87  
6.85  
6.83  
6.81  
6.79  
4.17  
4.16  
4.14  
4.13  
3.72  
3.70  
3.61  
3.59  
3.39  
3.38  
3.37  
2.14  
2.11  
1.99  
1.97  
1.95  
1.94  
1.66  
1.65  
1.64  
1.62  
1.61  
1.59  
1.57  
1.52  
1.51  
1.49  
1.46  
1.44  
1.28

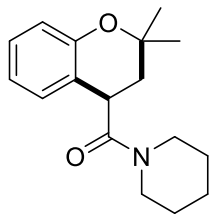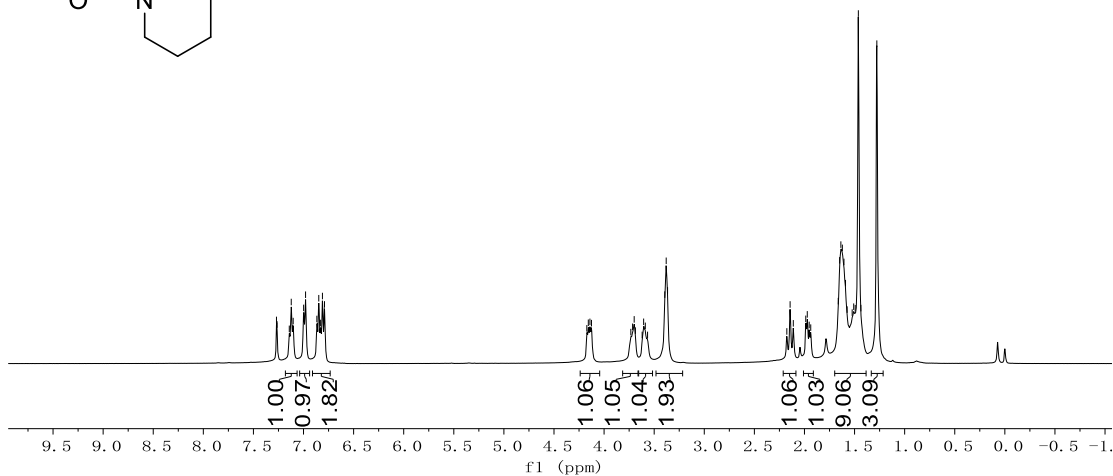

-171.79  
-153.36  
128.34  
127.76  
120.41  
120.18  
117.91  
77.48  
77.16  
76.84  
74.20  
47.28  
43.53  
38.32  
36.74  
30.02  
26.49  
25.87  
24.68  
24.60

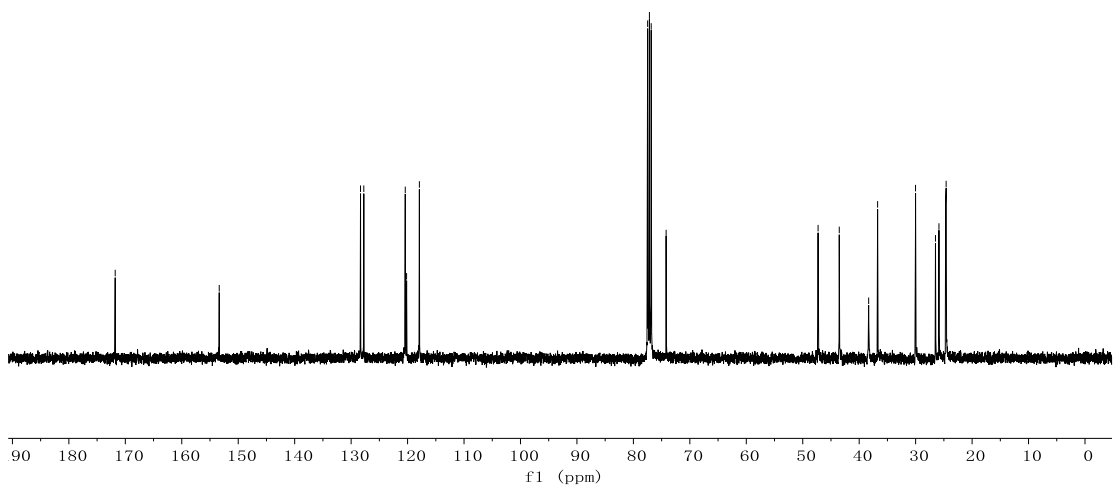

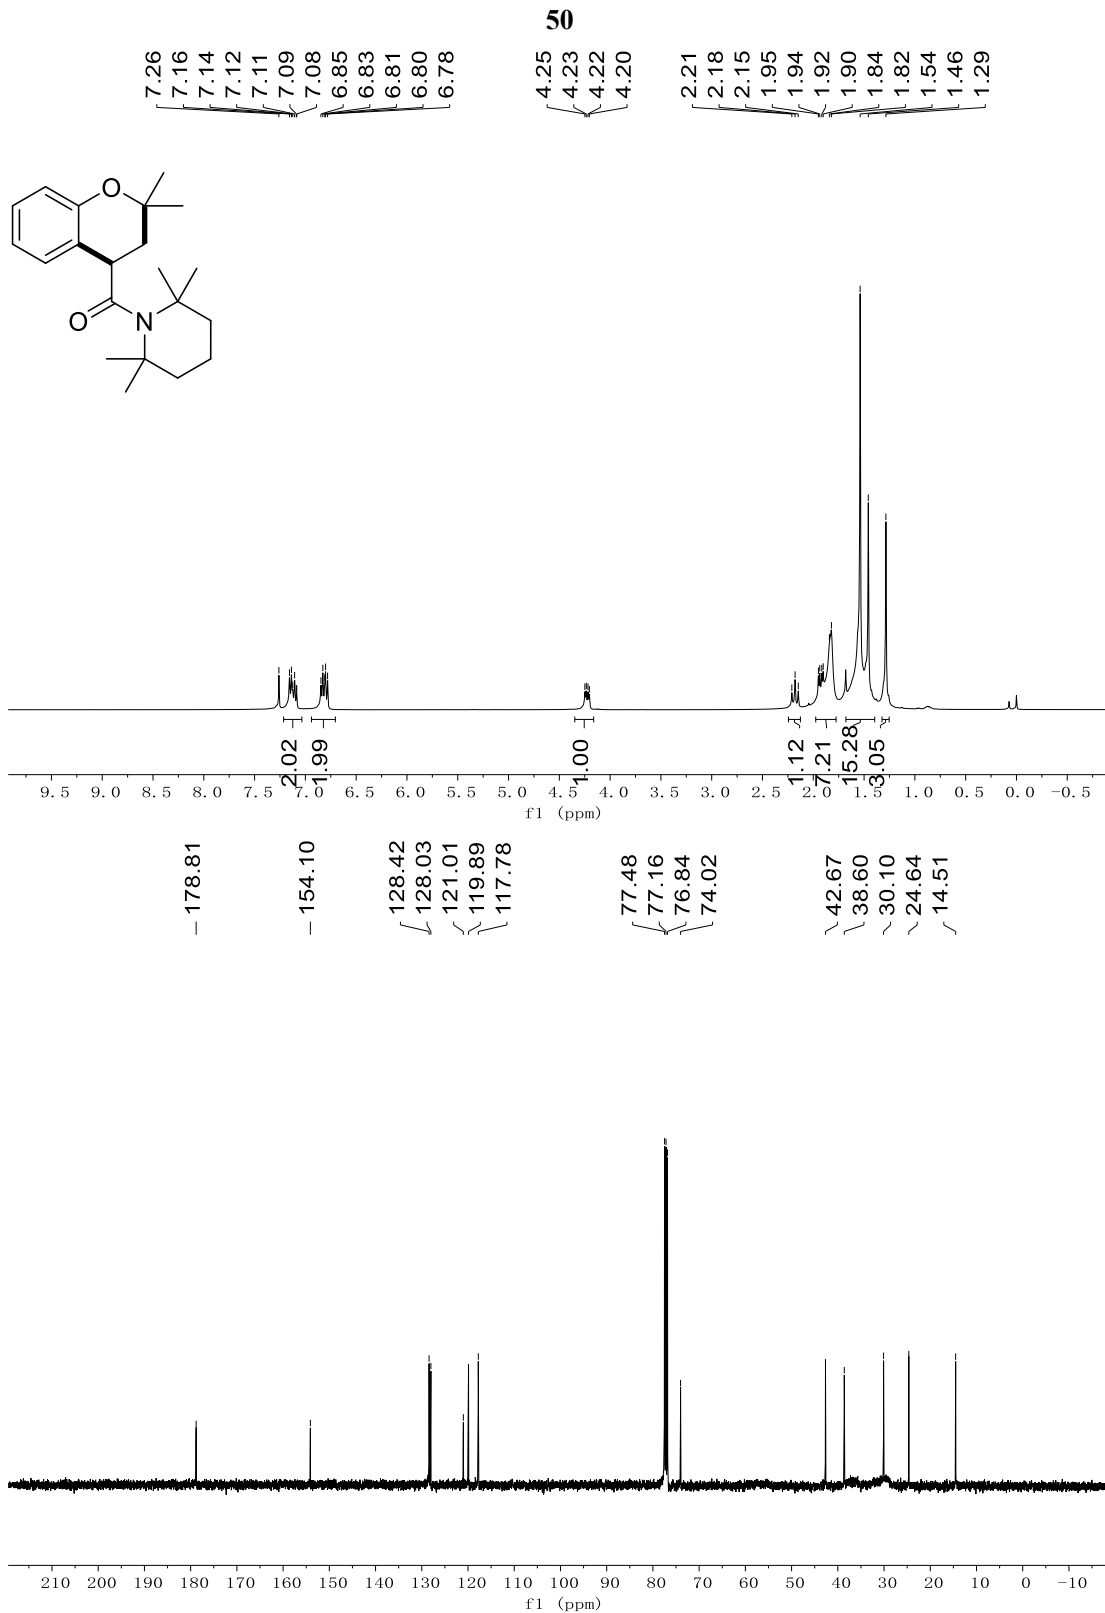

51

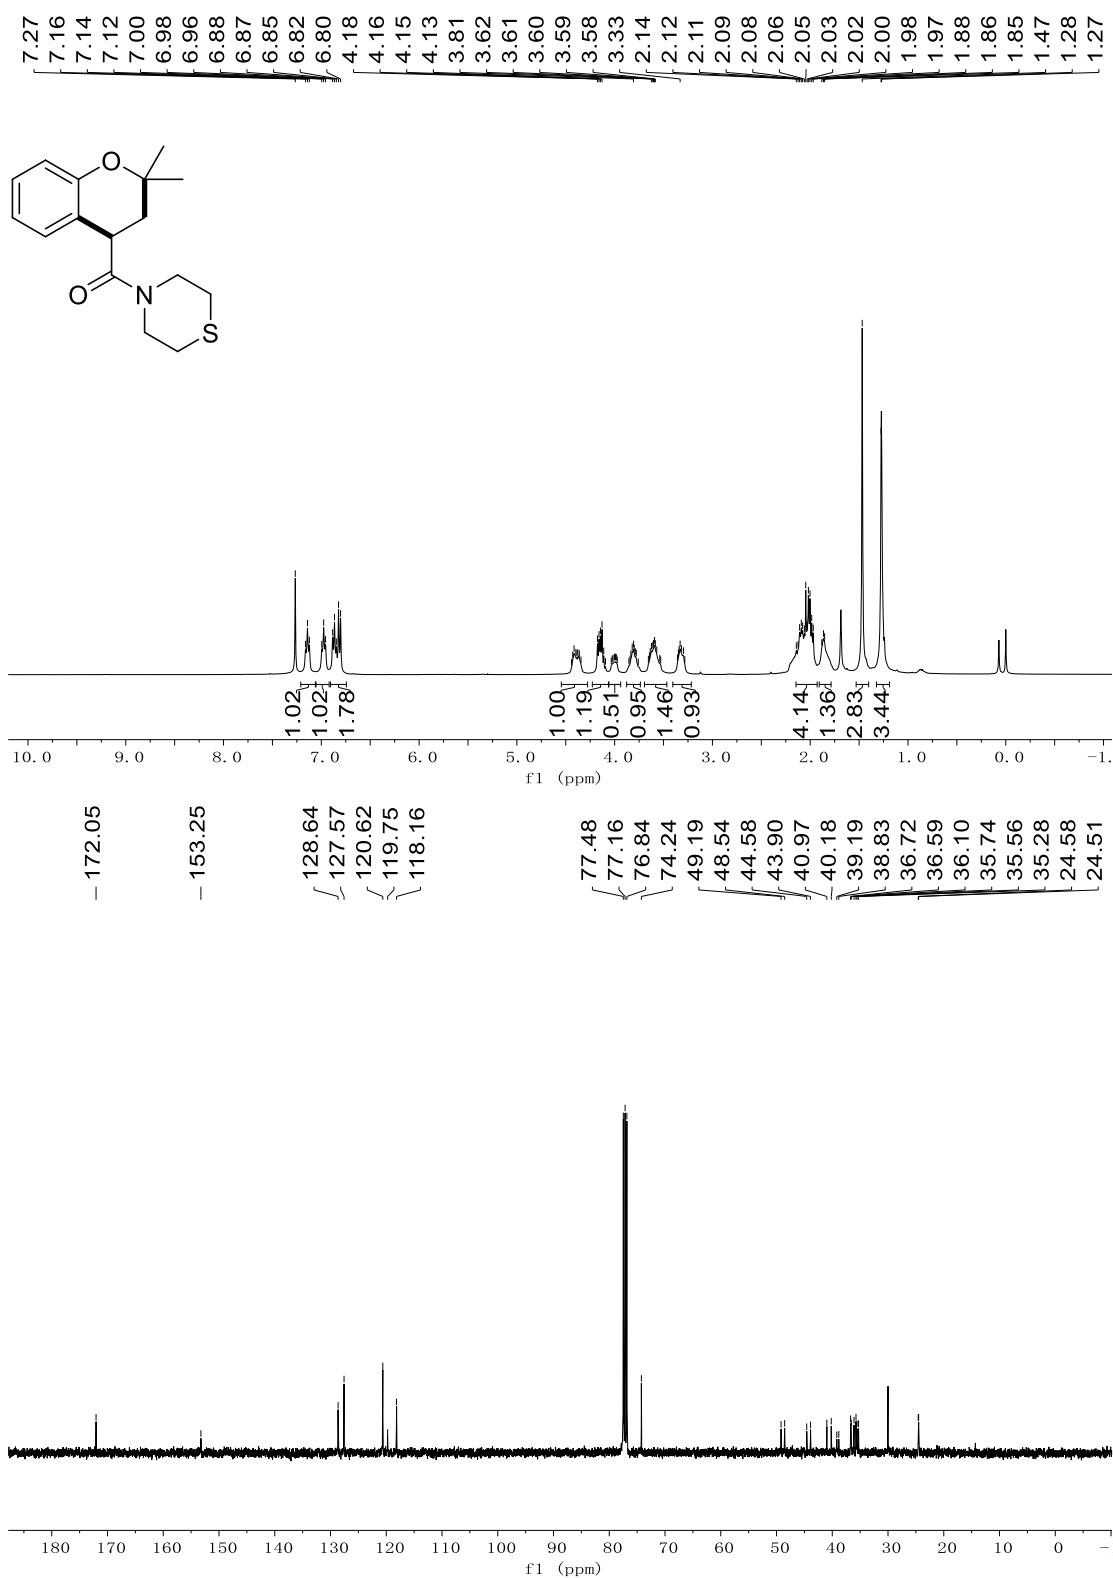



52

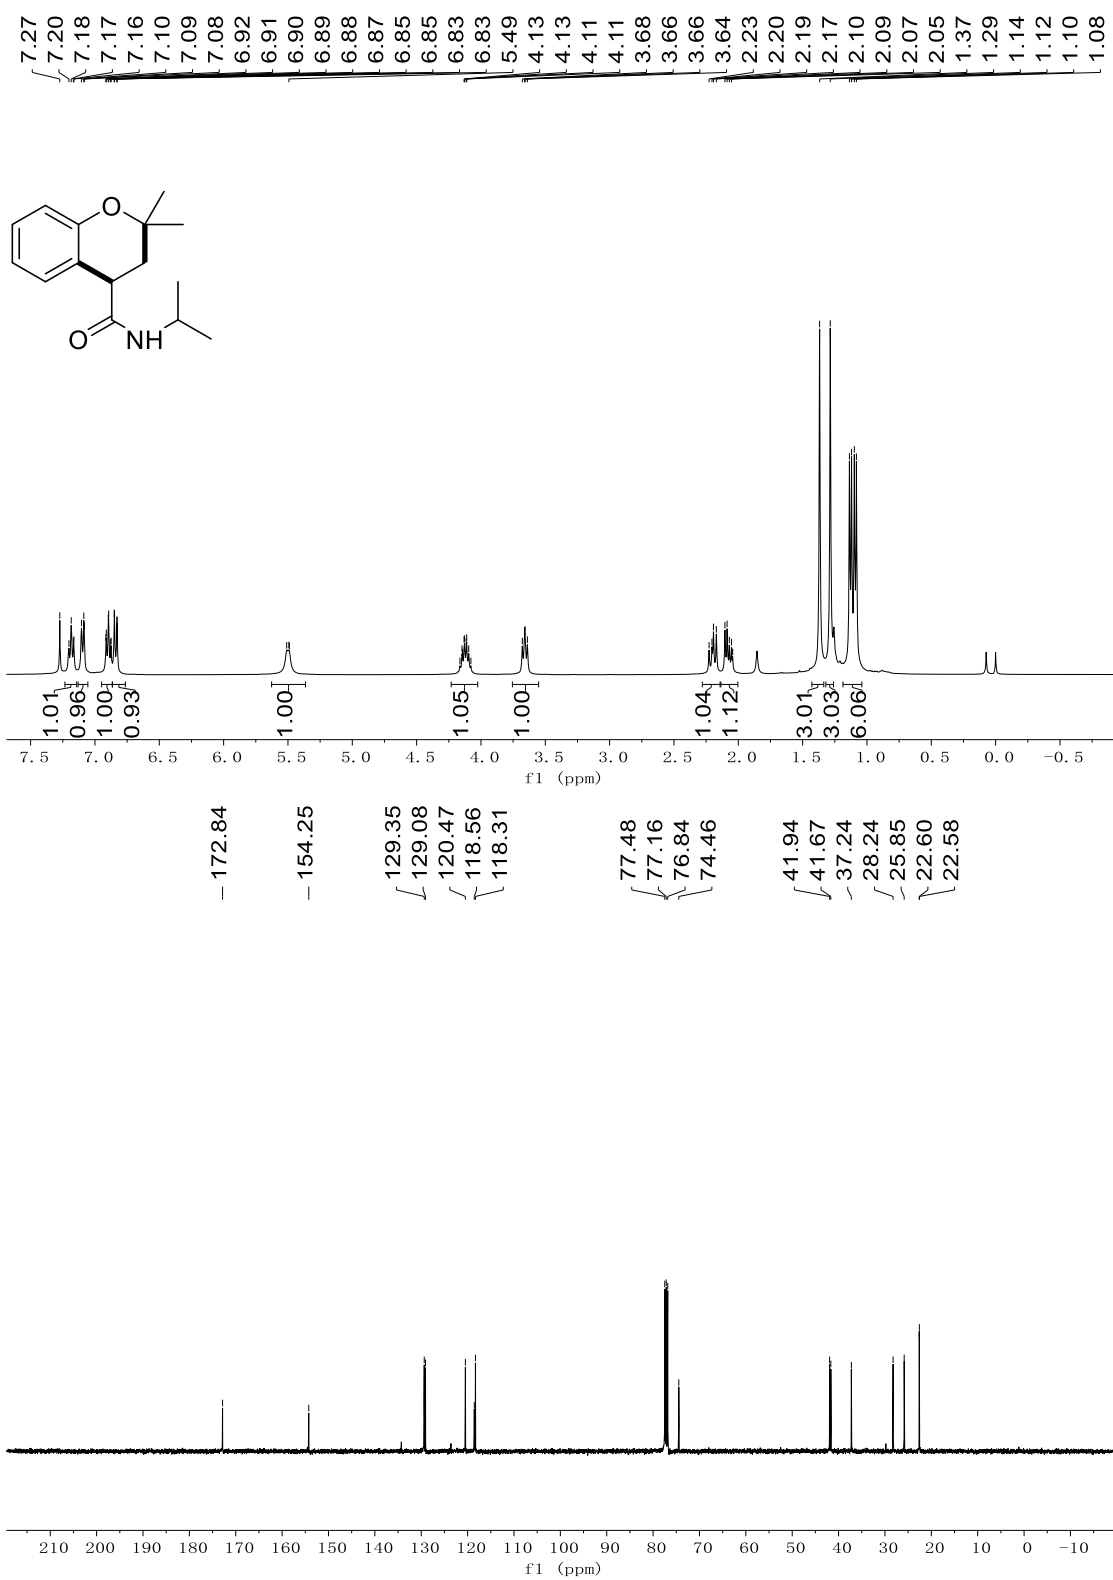

53

7.27  
7.18  
7.16  
7.16  
7.08  
7.07  
7.06  
7.05  
7.05  
6.90  
6.90  
6.89  
6.88  
6.87  
6.84  
6.83  
6.82  
6.81  
5.79  
3.68  
3.67  
3.65  
2.72  
2.71  
2.17  
2.15  
2.10  
2.08  
1.35  
1.28  
0.77  
0.77  
0.75  
0.75  
0.45  
0.44  
0.44  
0.43  
0.43  
0.42  
0.42

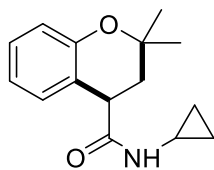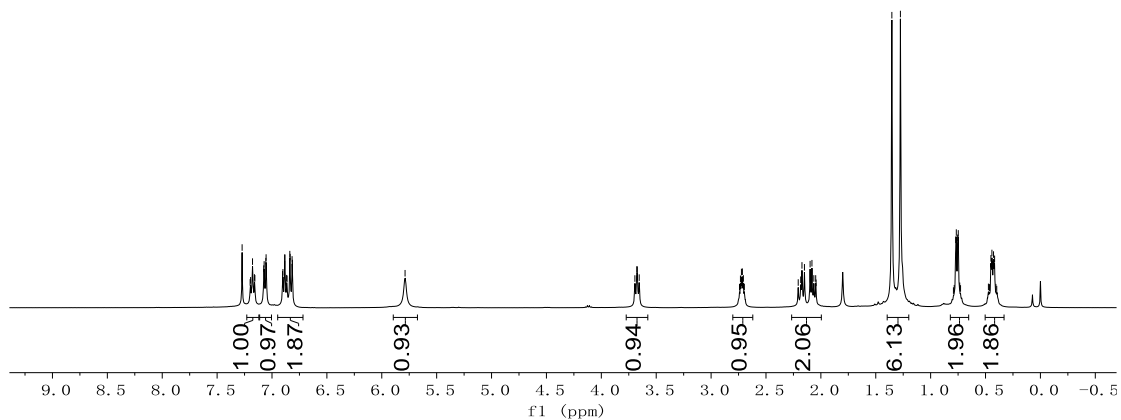

-175.28  
-154.21  
129.33  
129.15  
120.53  
118.41  
118.34  
77.48  
77.16  
76.84  
74.45  
41.80  
37.23  
28.23  
25.82  
22.96  
6.73  
6.66

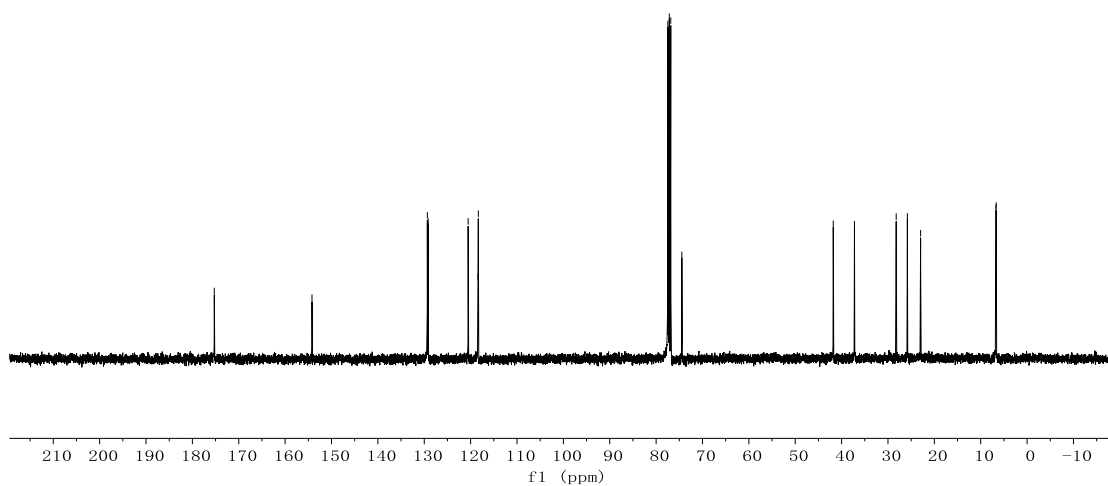

54

7.34  
7.33  
7.32  
7.31  
7.30  
7.28  
7.28  
7.26  
7.24  
7.24  
7.22  
7.18  
7.18  
7.16  
7.15  
7.14  
7.13  
7.11  
6.89  
6.87  
6.85  
6.83  
6.81  
5.99  
4.47  
4.46  
4.45  
4.45  
3.77  
3.76  
2.22  
2.20  
2.15  
2.13  
1.68  
1.36  
1.28  
1.26  
0.07  
0.06  
0.00

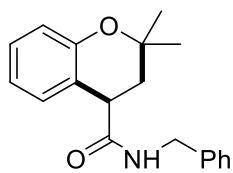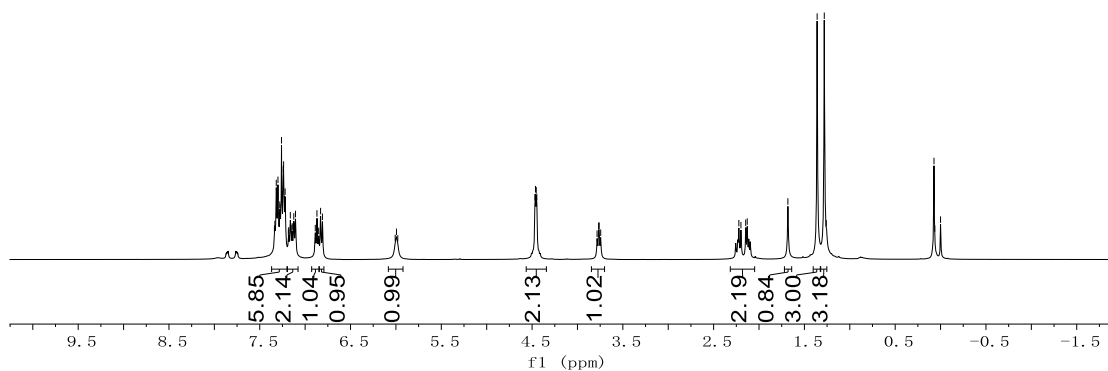

-173.78  
-154.28  
-138.12  
-129.46  
-129.21  
-128.83  
-127.84  
-127.67  
-120.56  
-118.39  
-118.31  
77.48  
77.16  
76.84  
74.46  
43.92  
42.00  
37.38  
28.35  
25.69  
-1.16

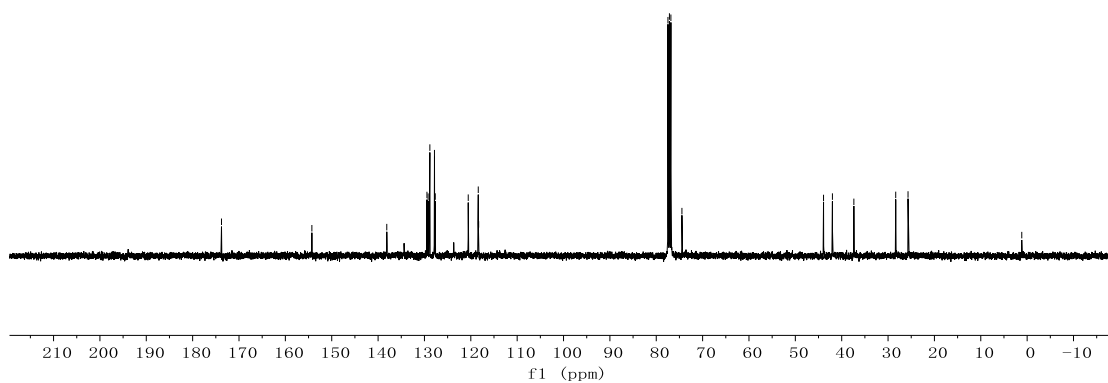

55

7.29  
7.28  
7.27  
7.26  
7.25  
7.25  
7.23  
7.22  
7.21  
7.15  
7.14  
7.13  
7.13  
7.11  
6.93  
6.93  
6.91  
6.81  
6.81  
6.81  
6.80  
6.79  
6.79  
6.78  
3.63  
3.63  
3.61  
3.57  
2.81  
2.80  
2.79  
2.78  
2.77  
2.76  
2.15  
2.13  
2.05  
2.03  
1.31  
1.25

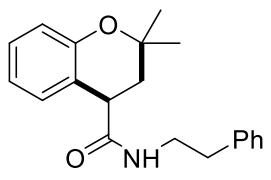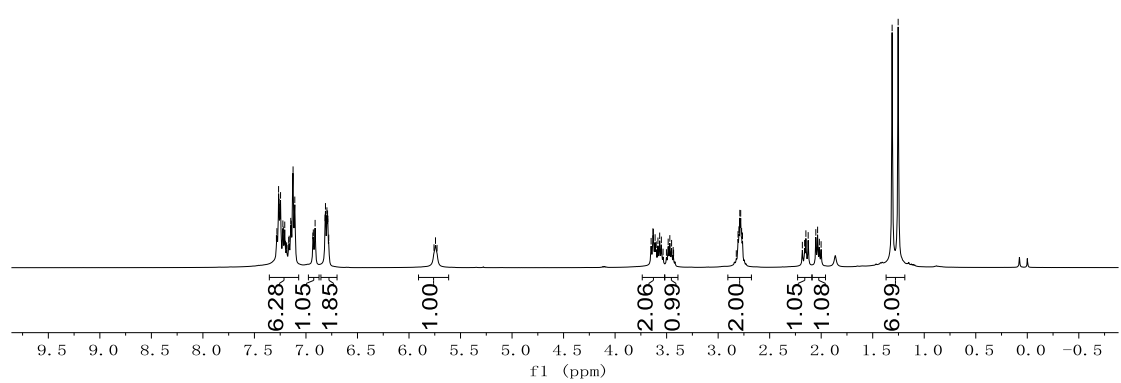

-173.70  
-154.16  
-138.67  
-129.44  
-129.02  
-128.80  
-128.71  
-126.61  
-120.44  
-118.28  
-118.22  
77.48  
77.16  
76.84  
74.38  
41.83  
40.87  
37.14  
35.49  
28.09  
25.87

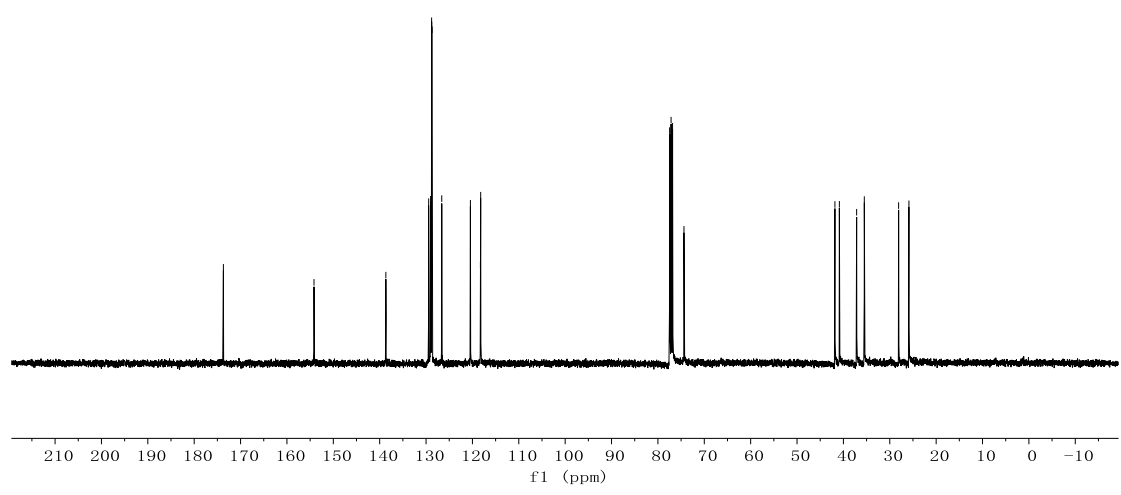

56

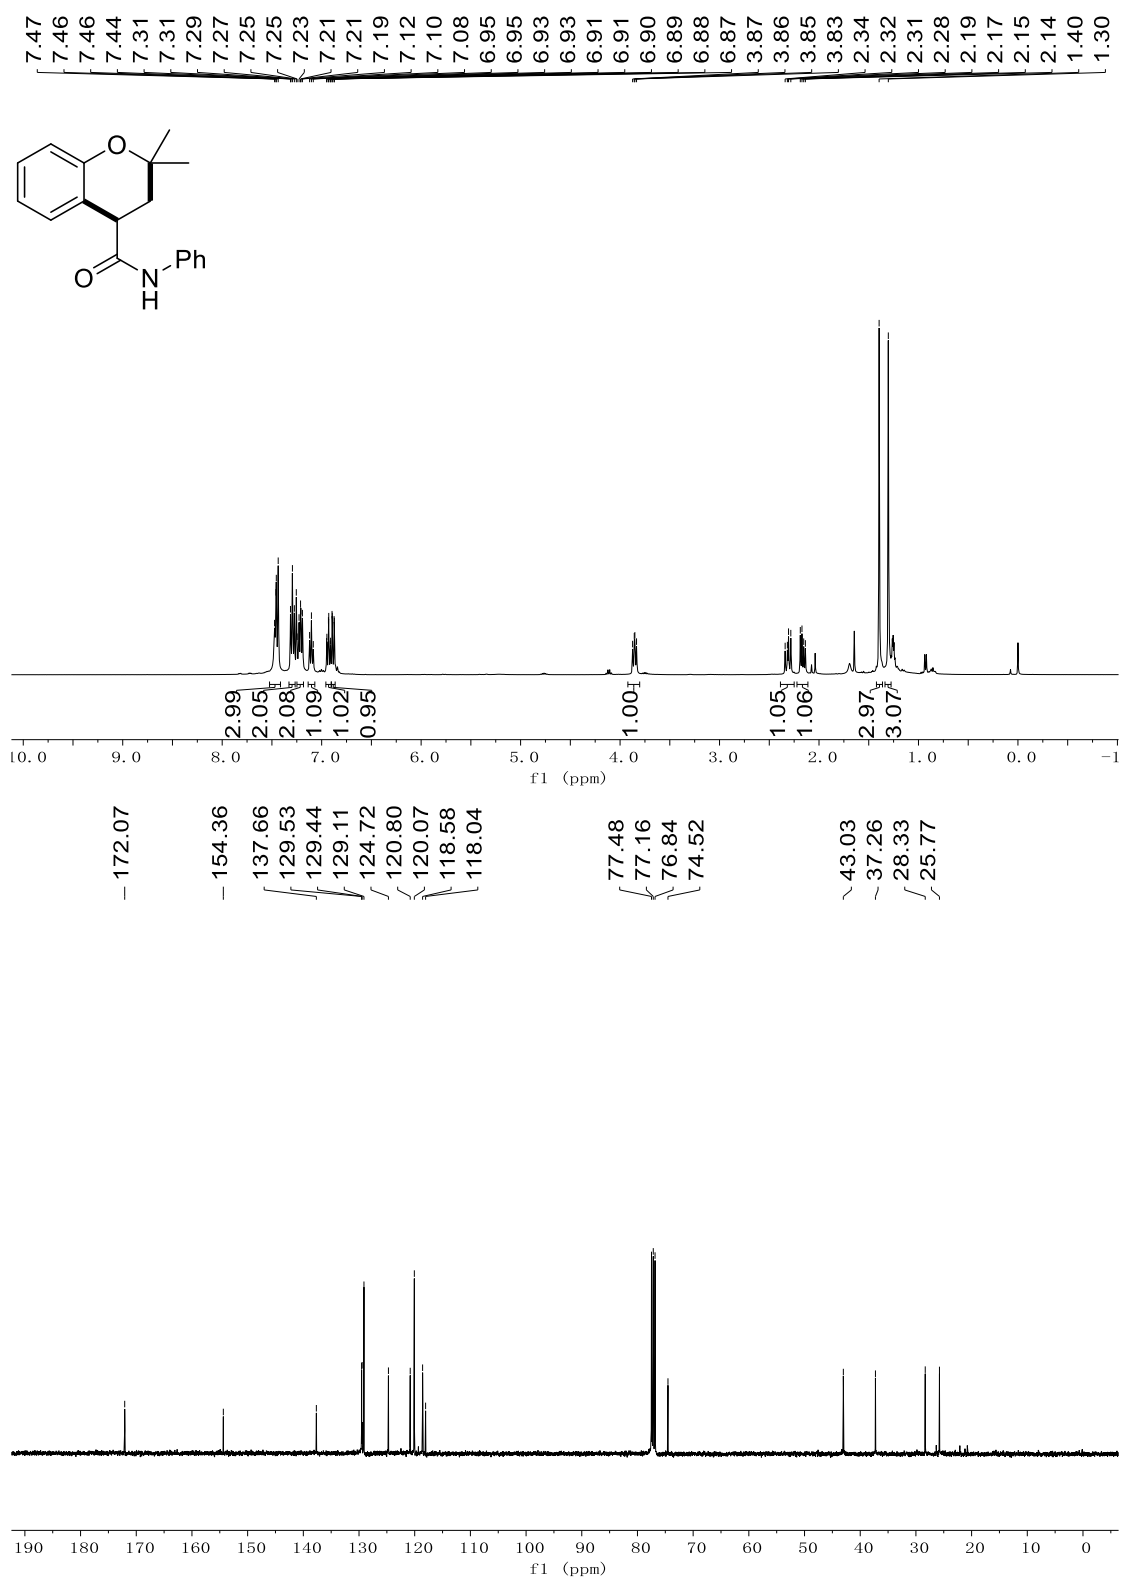

57

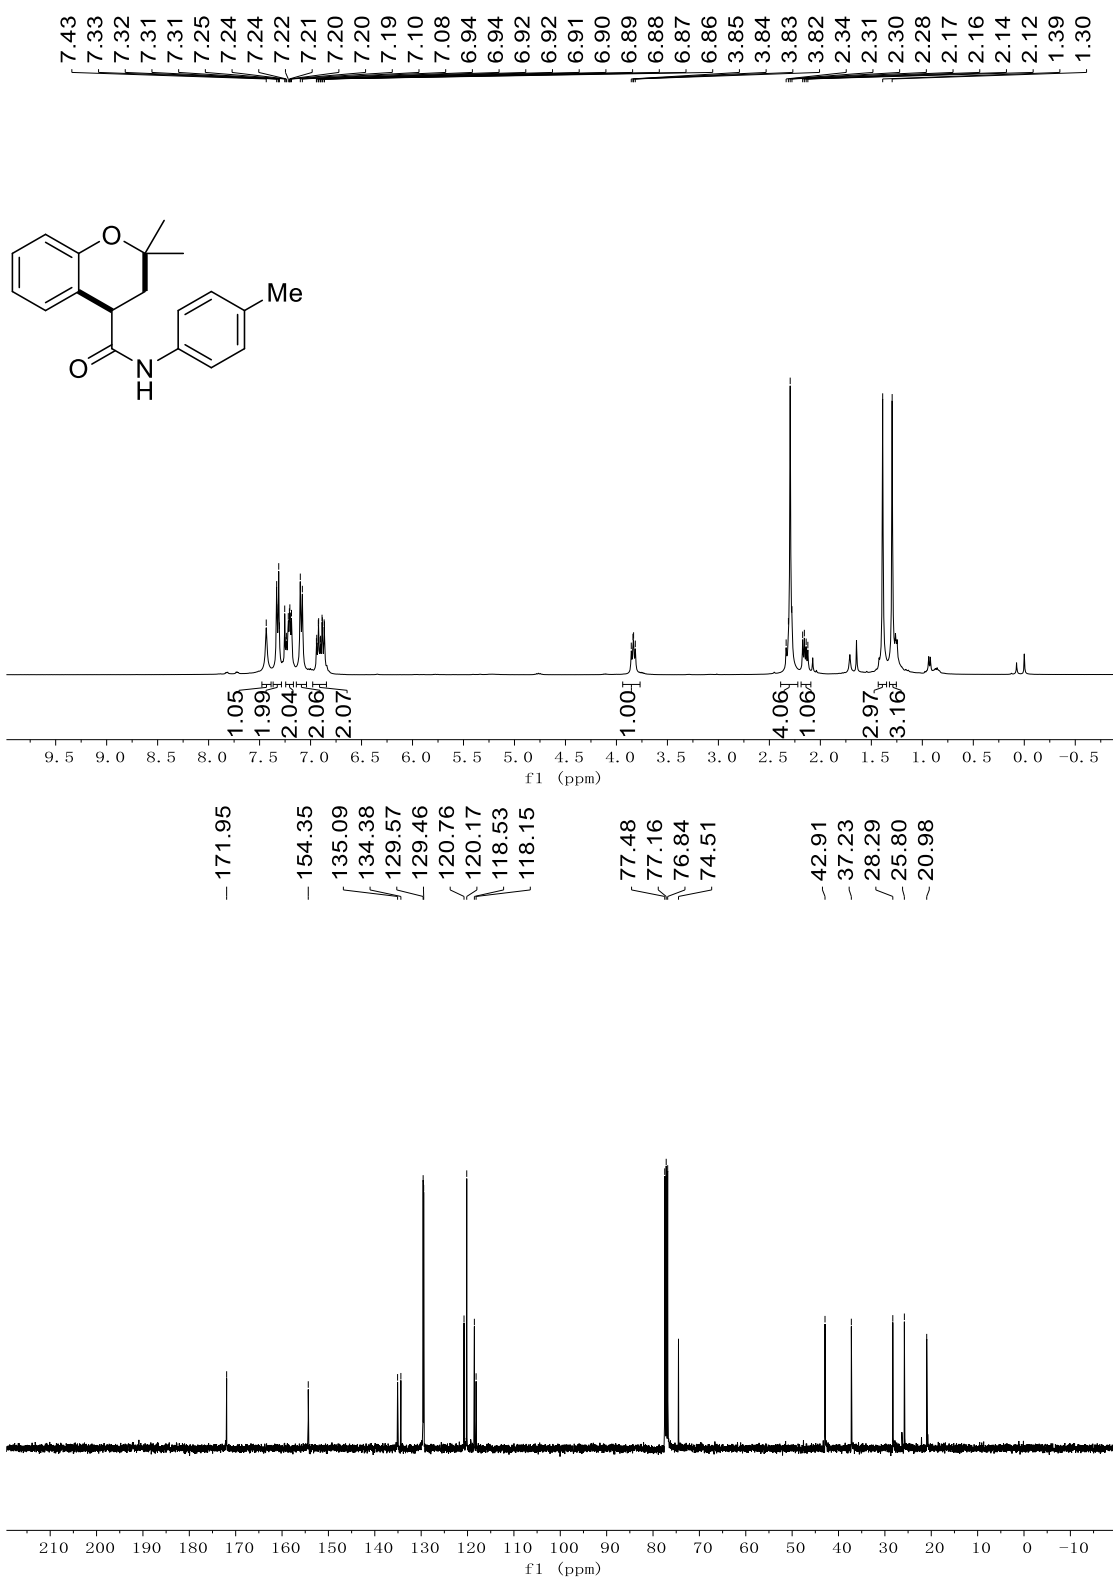

58

7.26  
7.19  
7.18  
7.17  
7.16  
7.15  
7.15  
6.88  
6.86  
6.84  
6.81  
6.79  
6.79  
3.97  
3.96  
2.22  
2.21  
2.18  
2.07  
2.05  
2.03  
2.02  
1.96  
1.95  
1.93  
1.92  
1.91  
1.73  
1.71  
1.69  
1.61  
1.59  
1.58  
1.46  
1.45  
1.43  
1.42  
1.40  
1.29  
1.26  
1.25

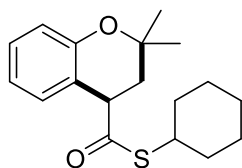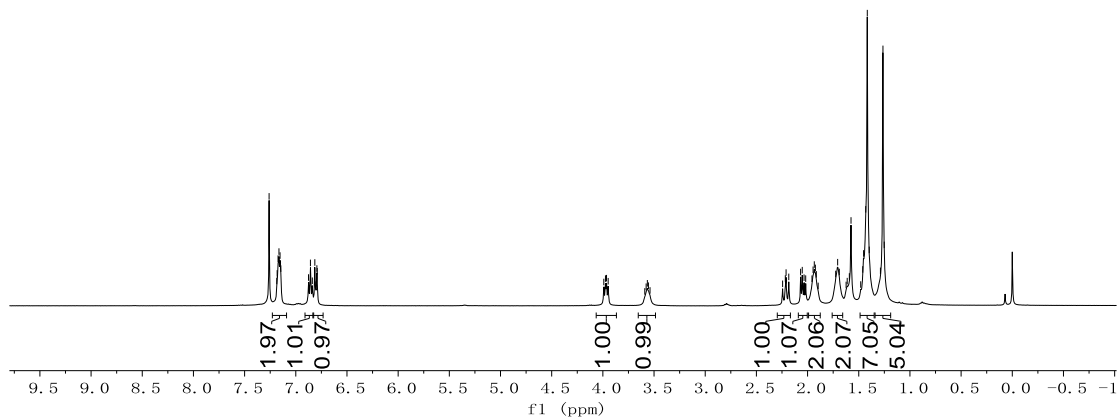

- 201.38

- 153.87

129.32

129.02

120.13

118.09

117.94

77.48

77.16

76.84

74.05

48.38

42.88

37.49

33.14

33.03

29.21

26.10

25.67

24.97

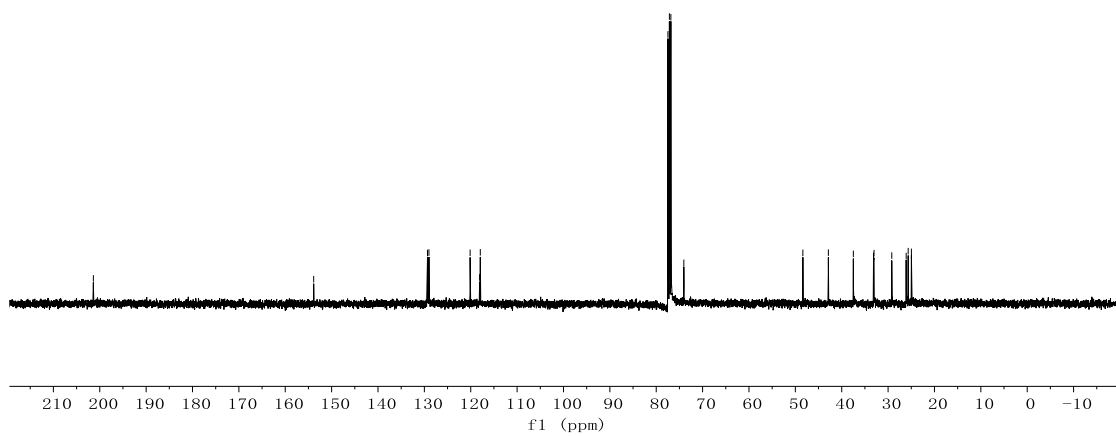

59

7.87  
7.85  
7.28  
7.16  
7.14  
7.12  
6.89  
6.88  
6.86  
6.81  
6.79  
4.17  
4.15  
4.13  
4.11  
4.10  
4.10  
4.09  
4.08  
4.07  
4.07  
4.06  
4.05  
3.92  
3.90  
3.89  
2.10  
2.10  
2.09  
2.08  
2.07  
2.06  
2.03  
1.47  
1.35  
1.33  
1.31  
1.19  
1.16  
1.14  
1.12

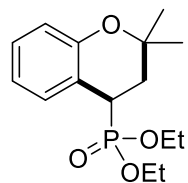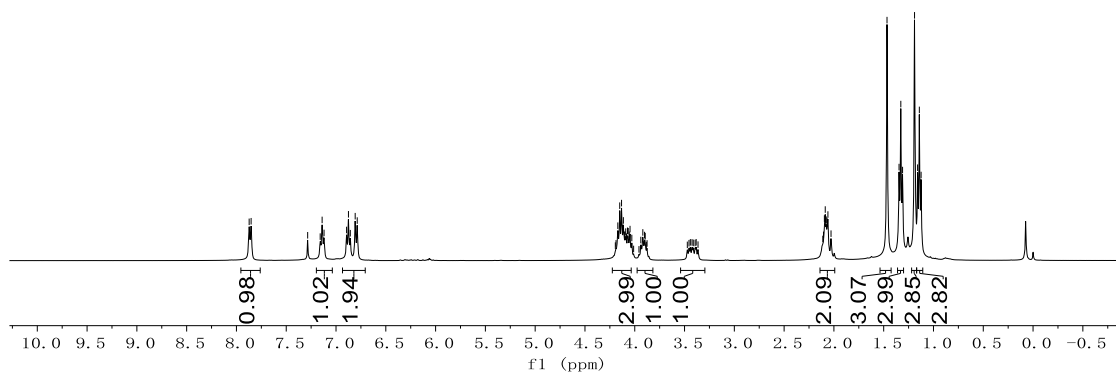

154.00  
153.92  
129.46  
129.41  
128.48  
128.46  
120.22  
120.20  
118.09  
115.96  
115.91  
77.48  
77.16  
76.84  
73.28  
73.16  
63.09  
63.03  
61.82  
61.75  
34.95  
34.90  
32.28  
30.84  
29.80  
23.20  
16.55  
16.49  
16.43  
16.38

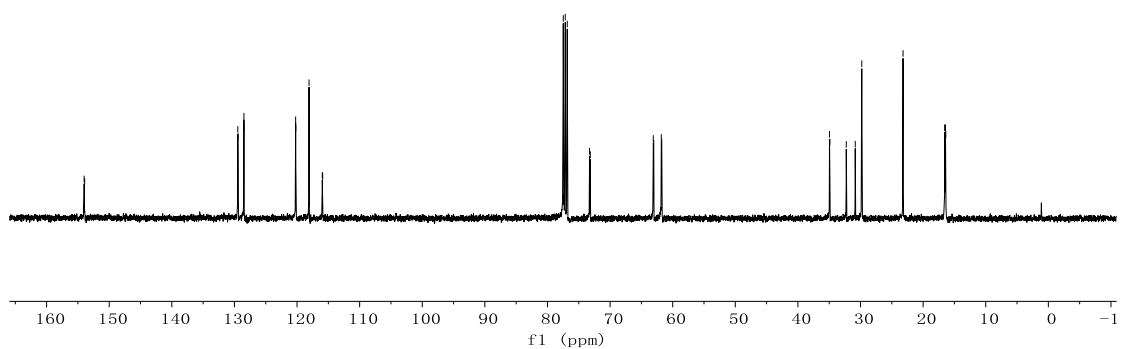



60

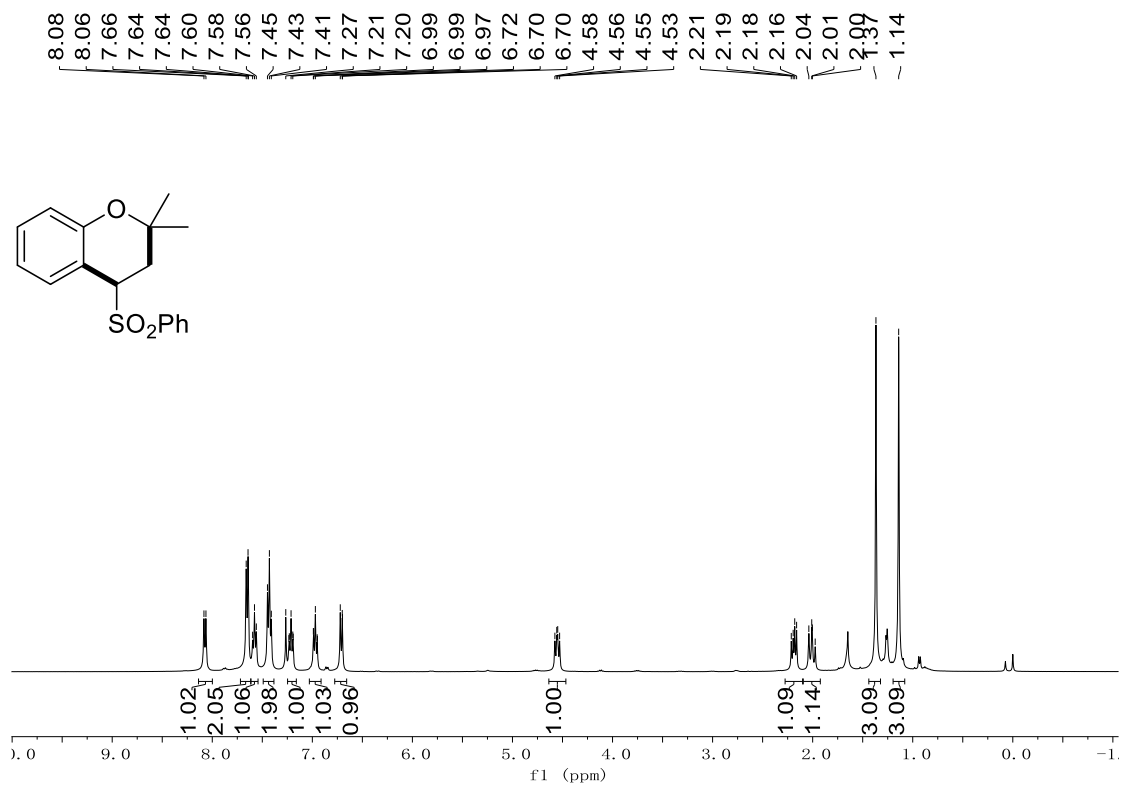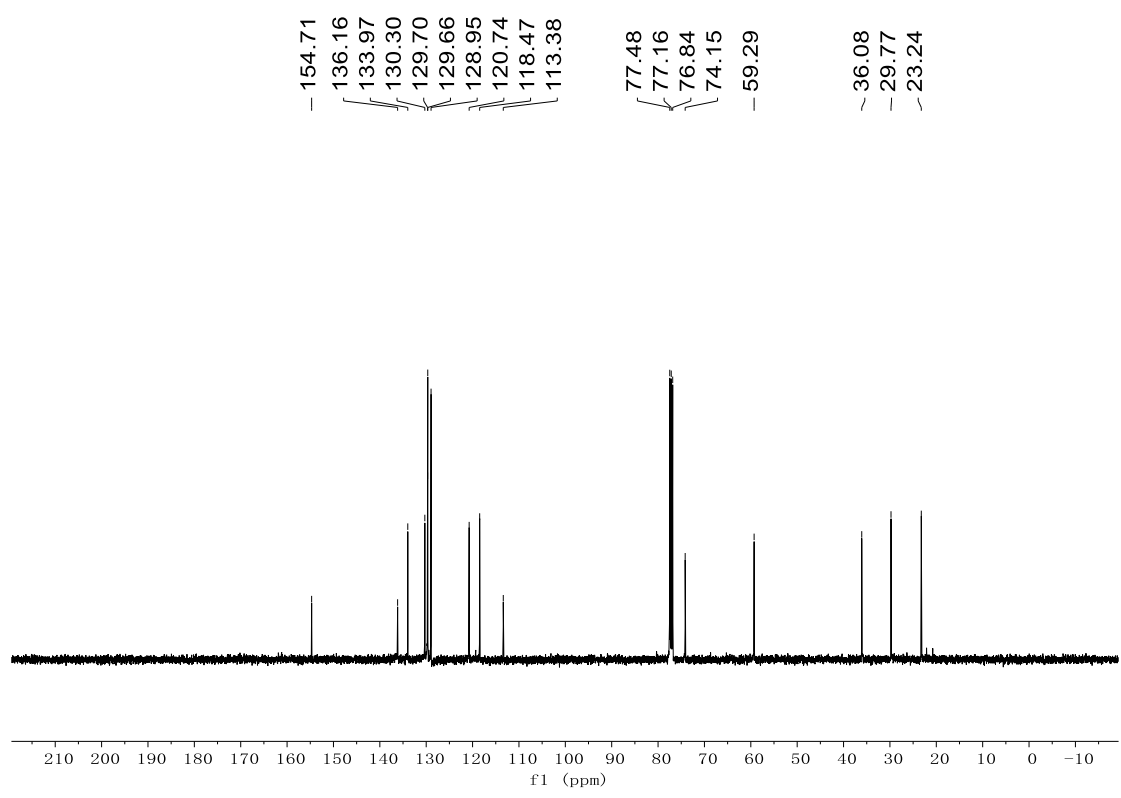

61

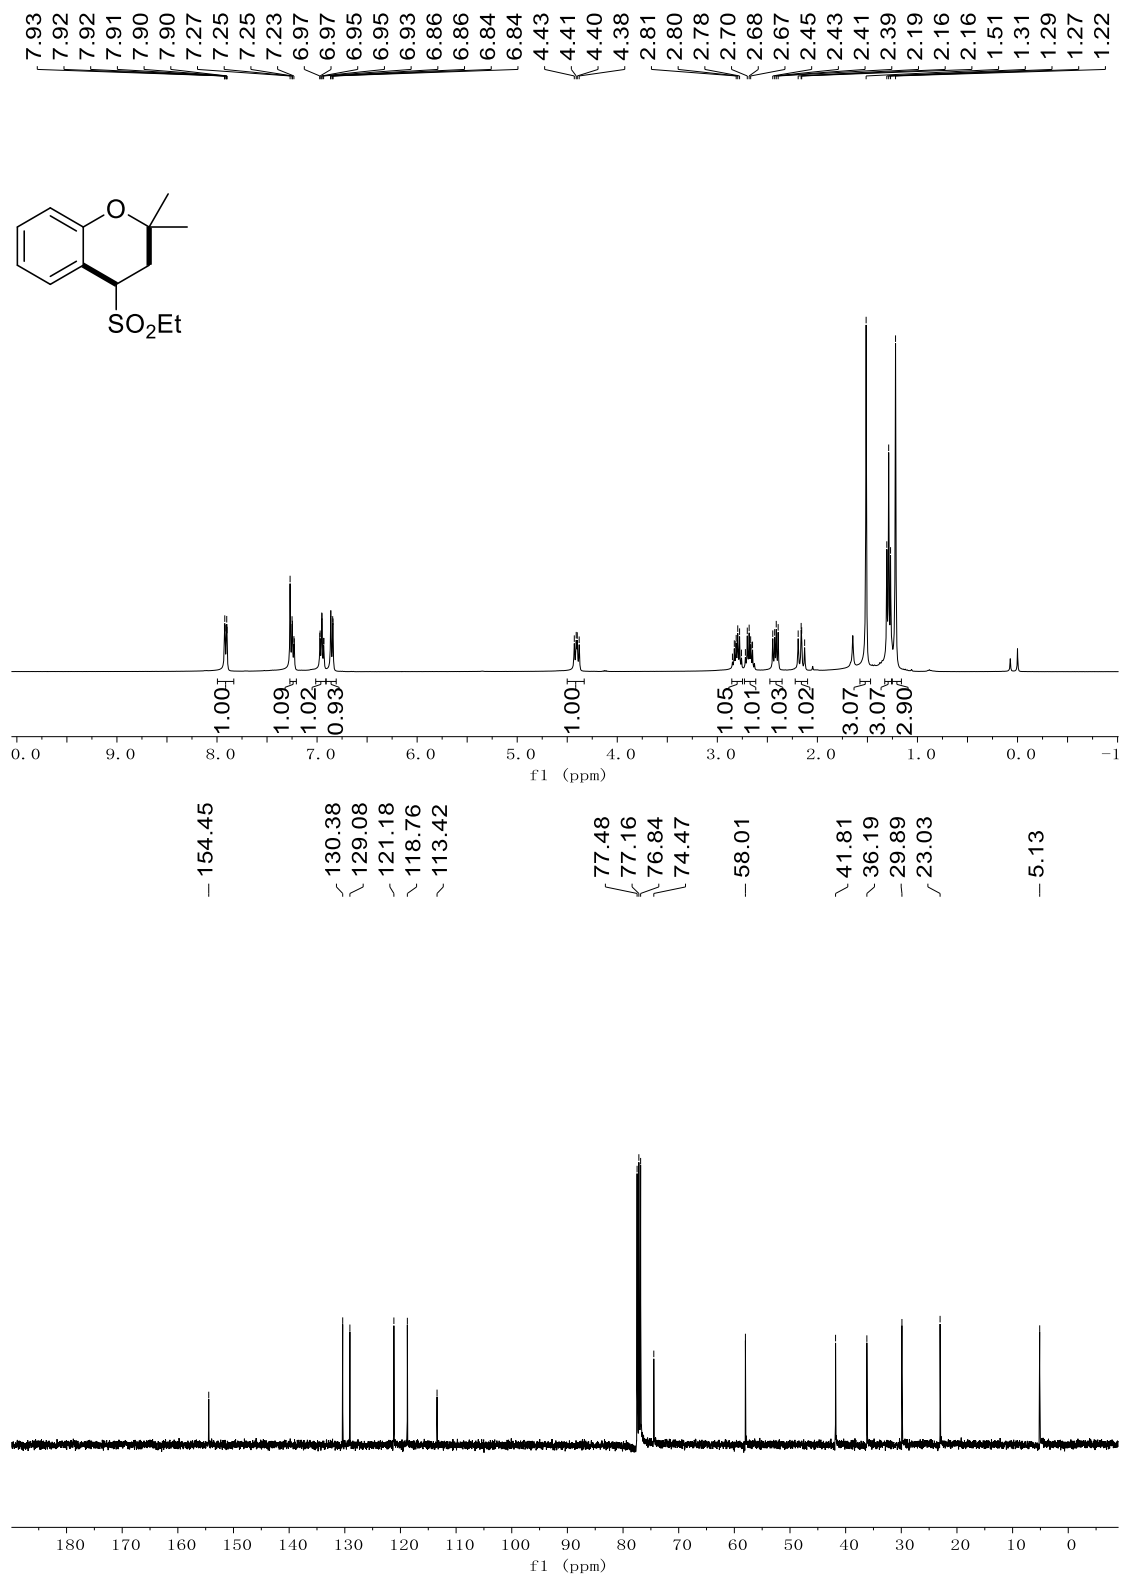

62

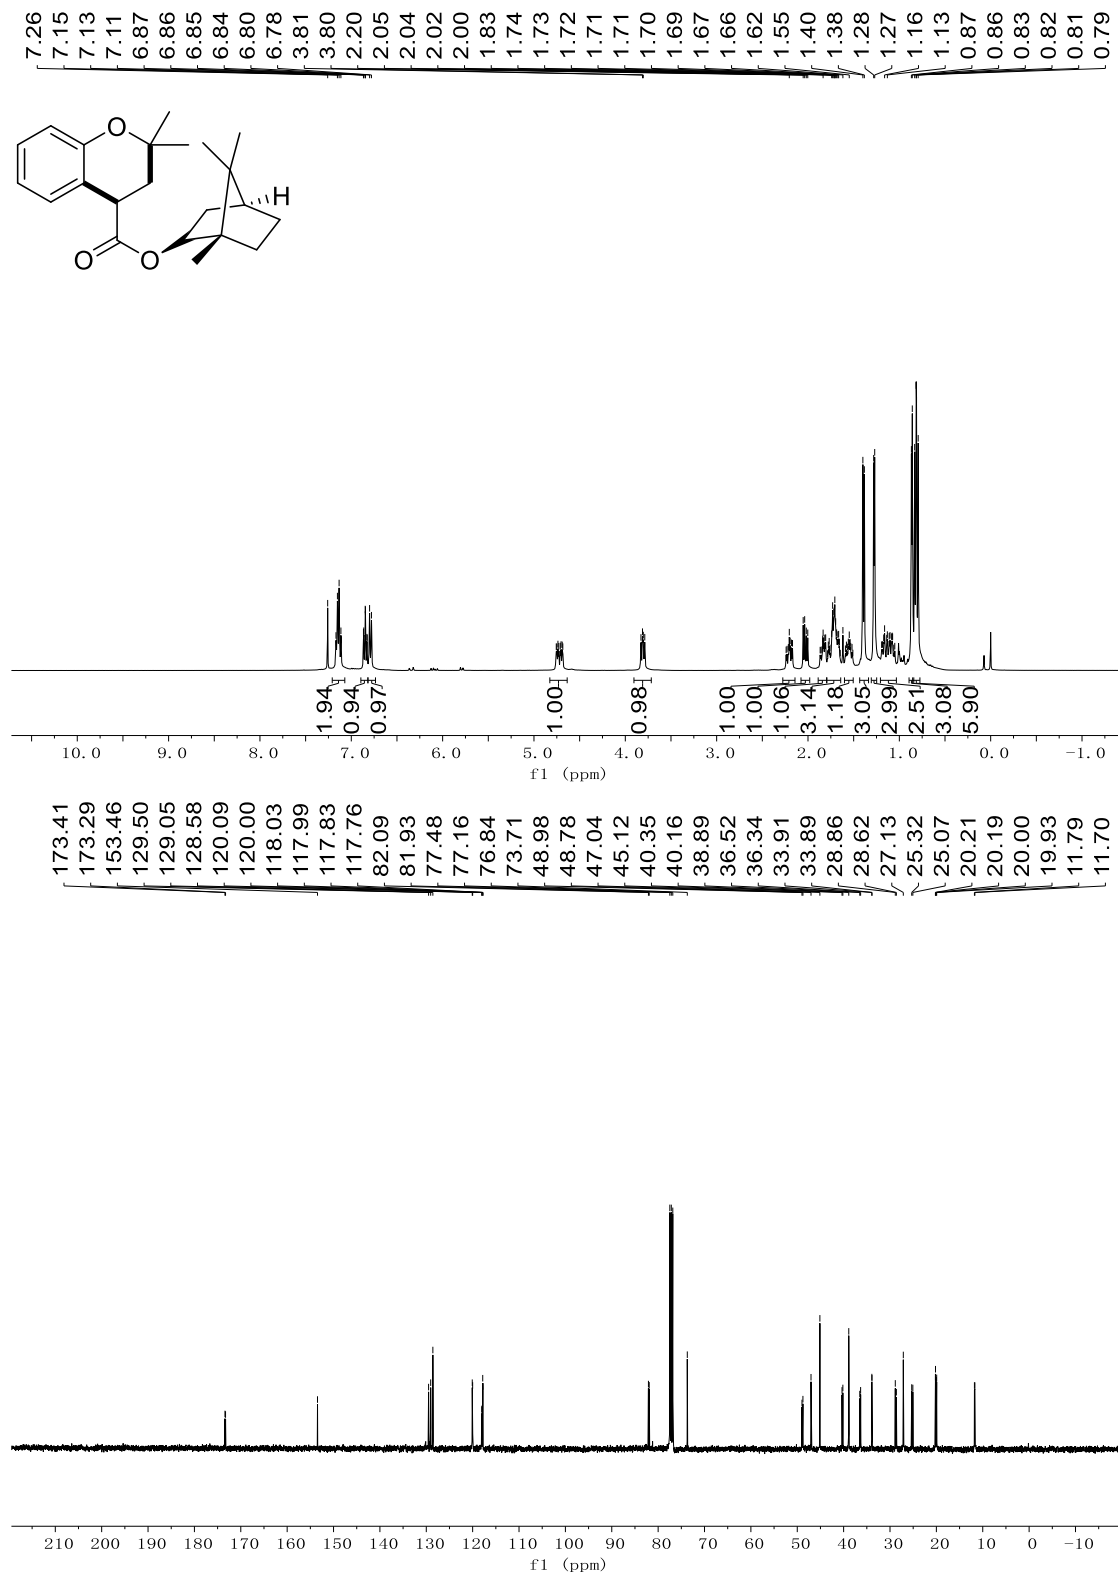

63

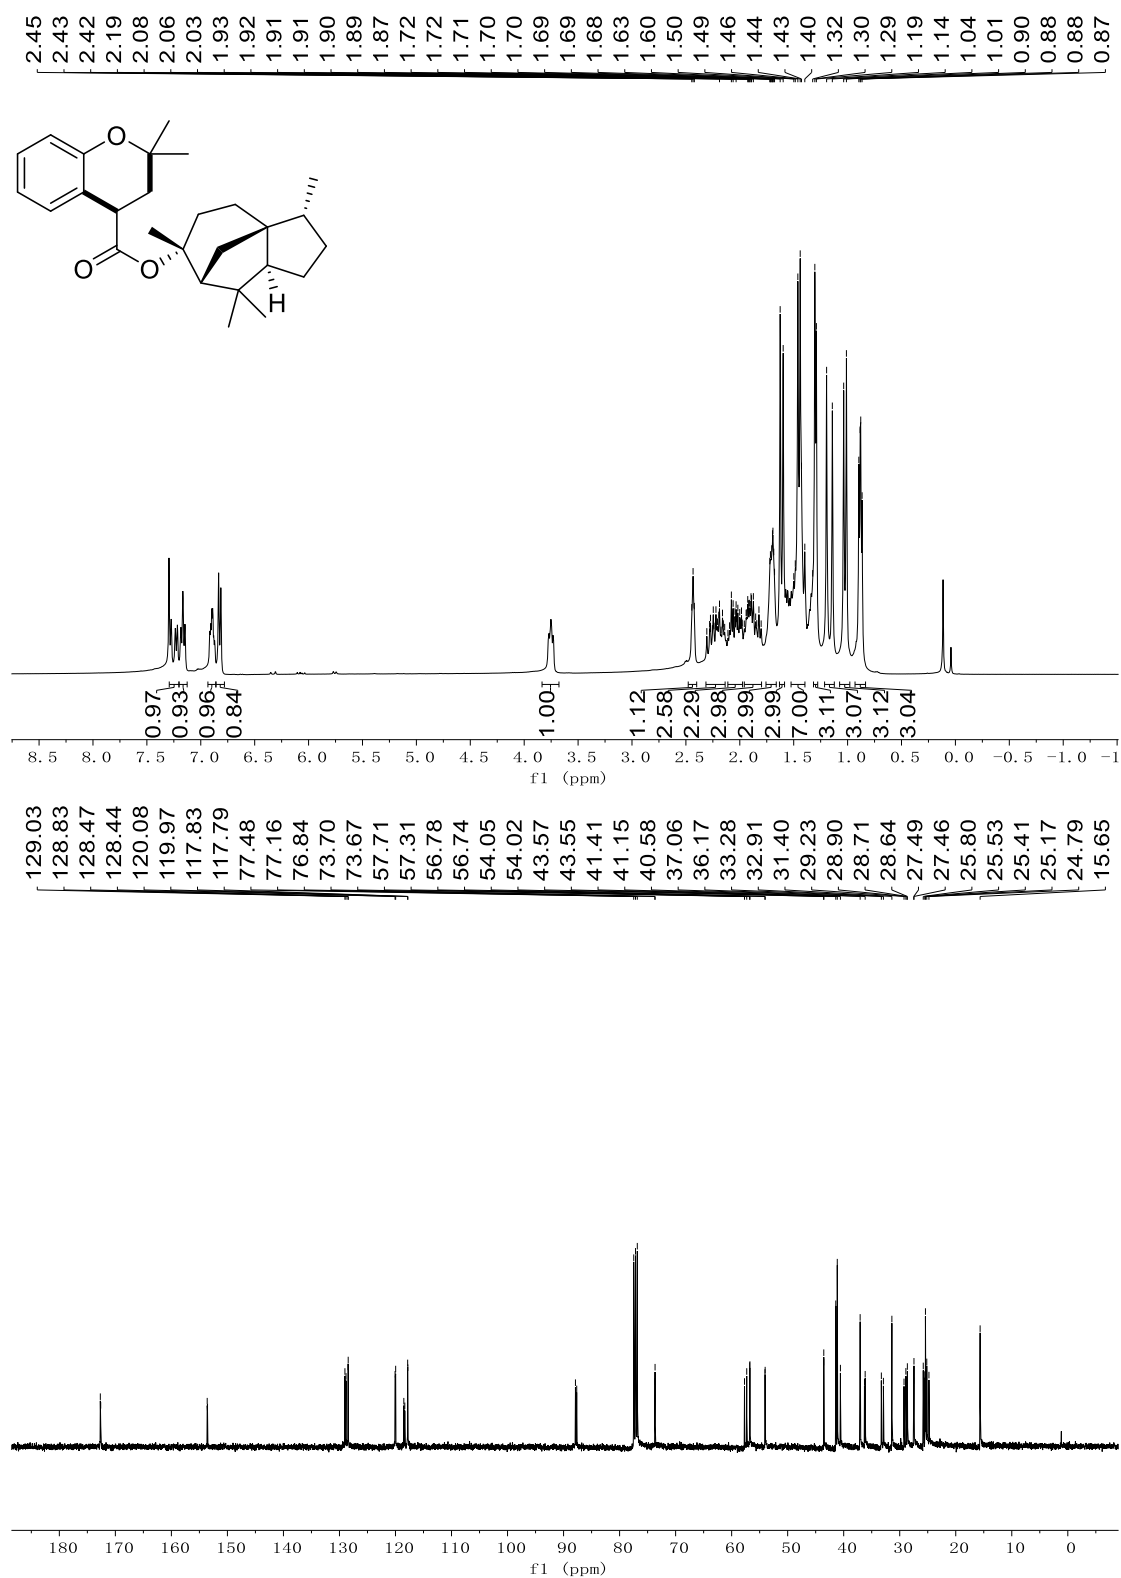

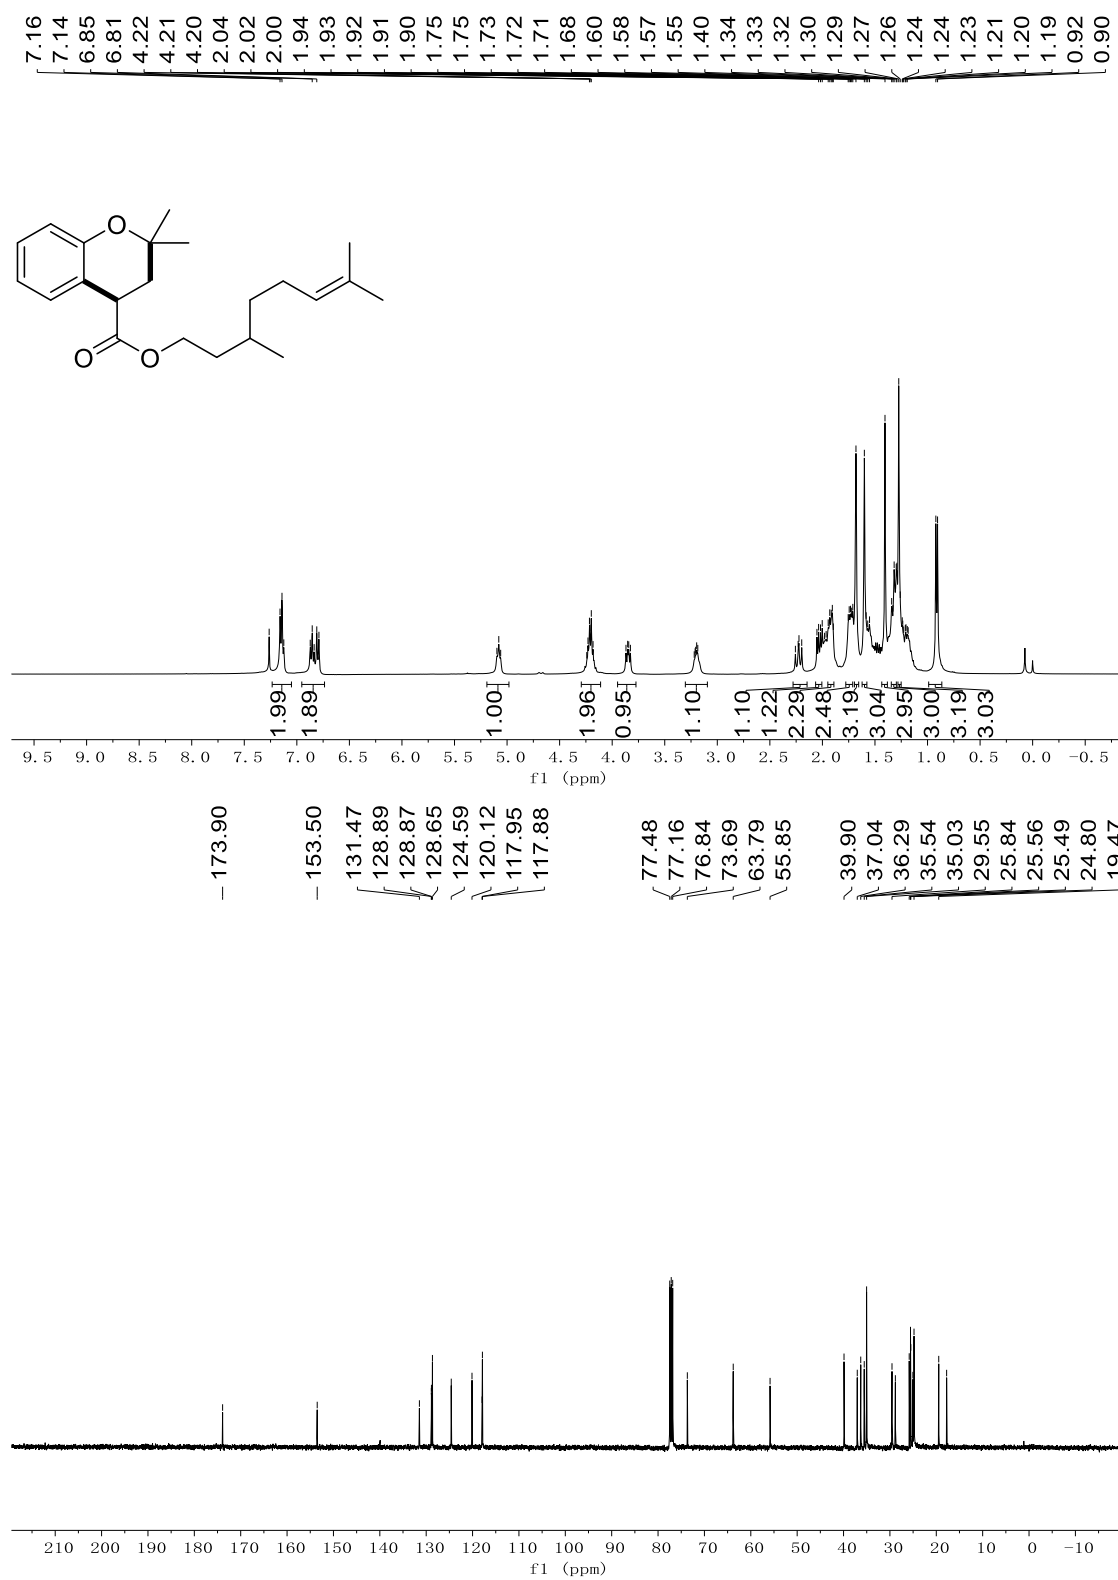

65

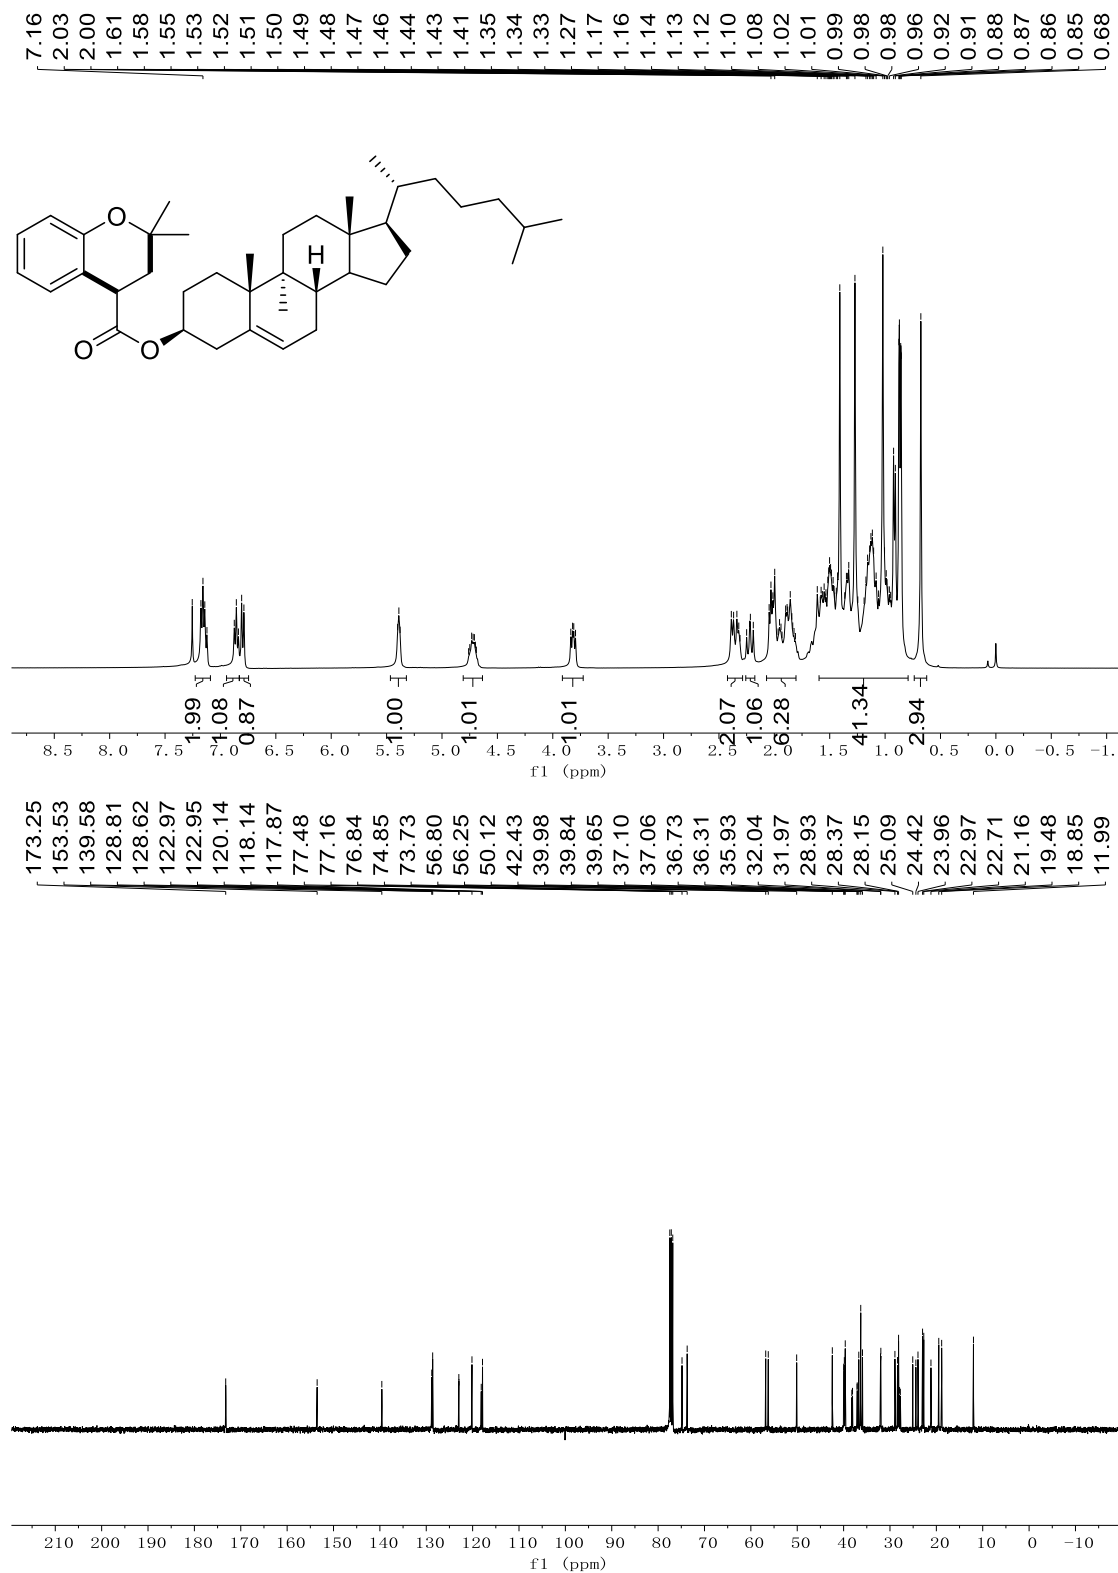

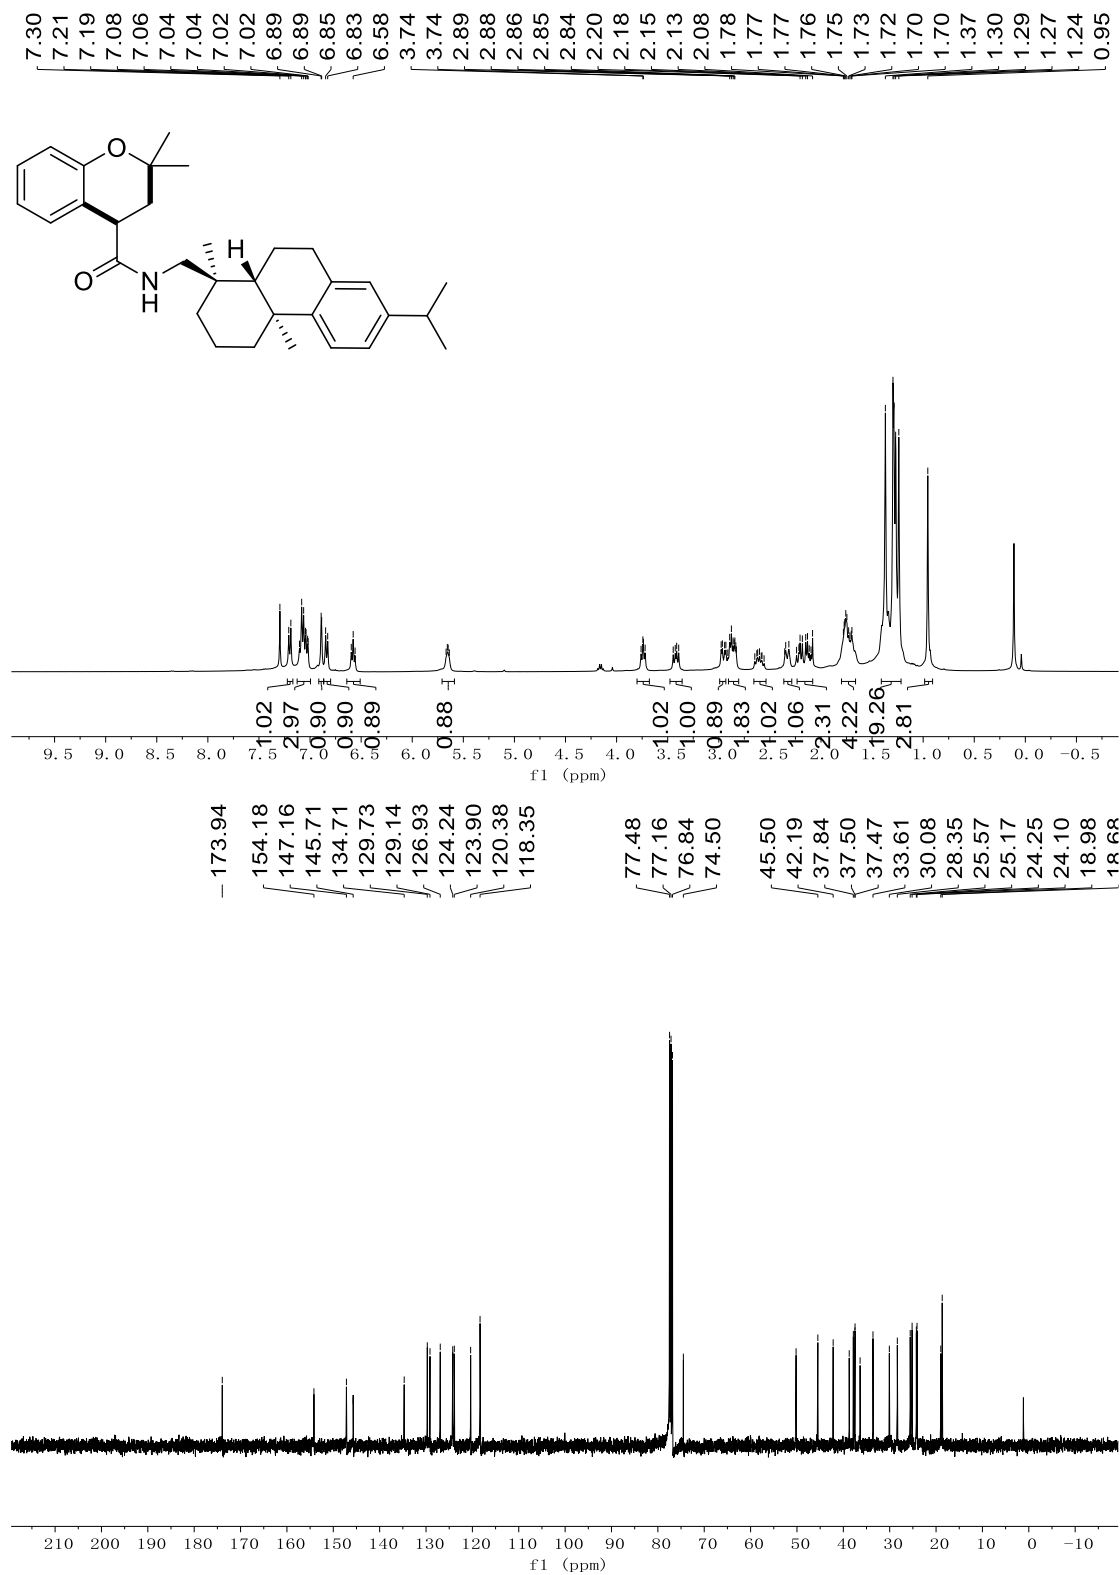

67

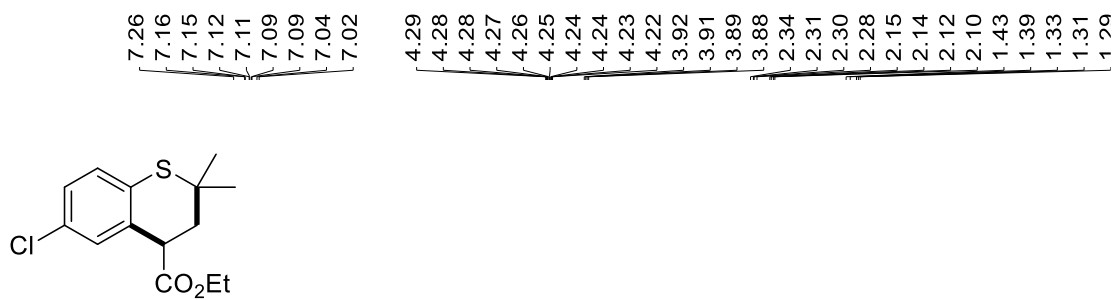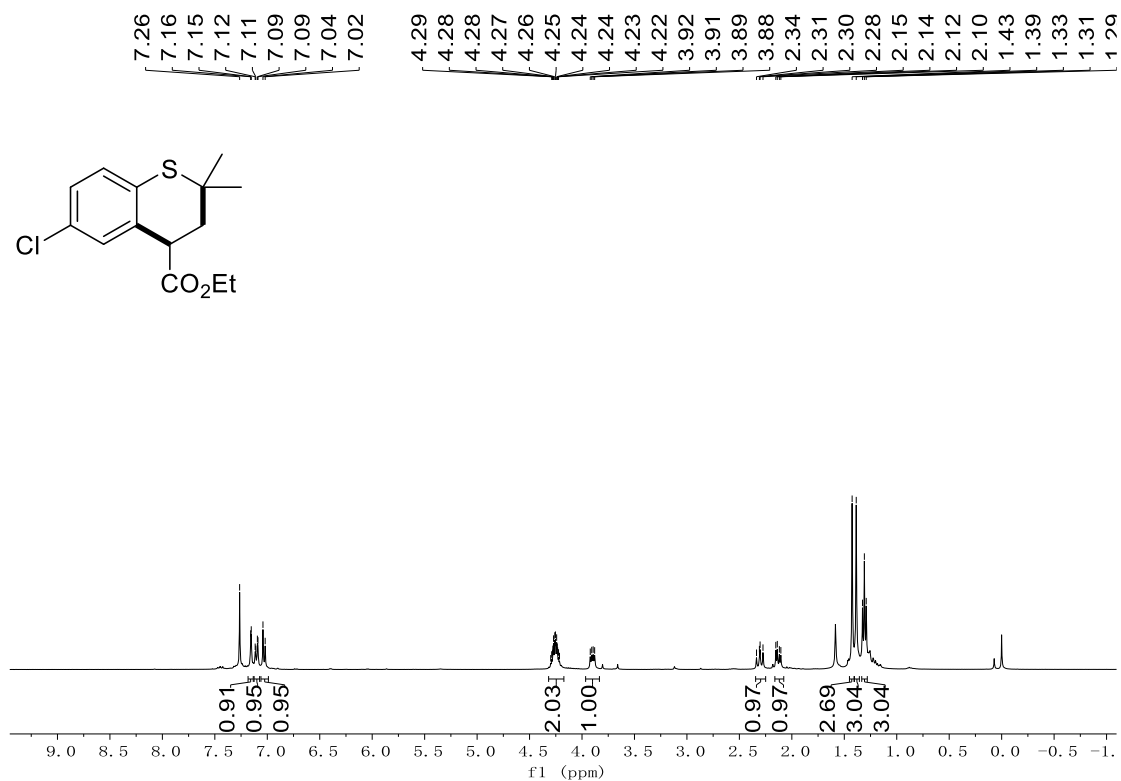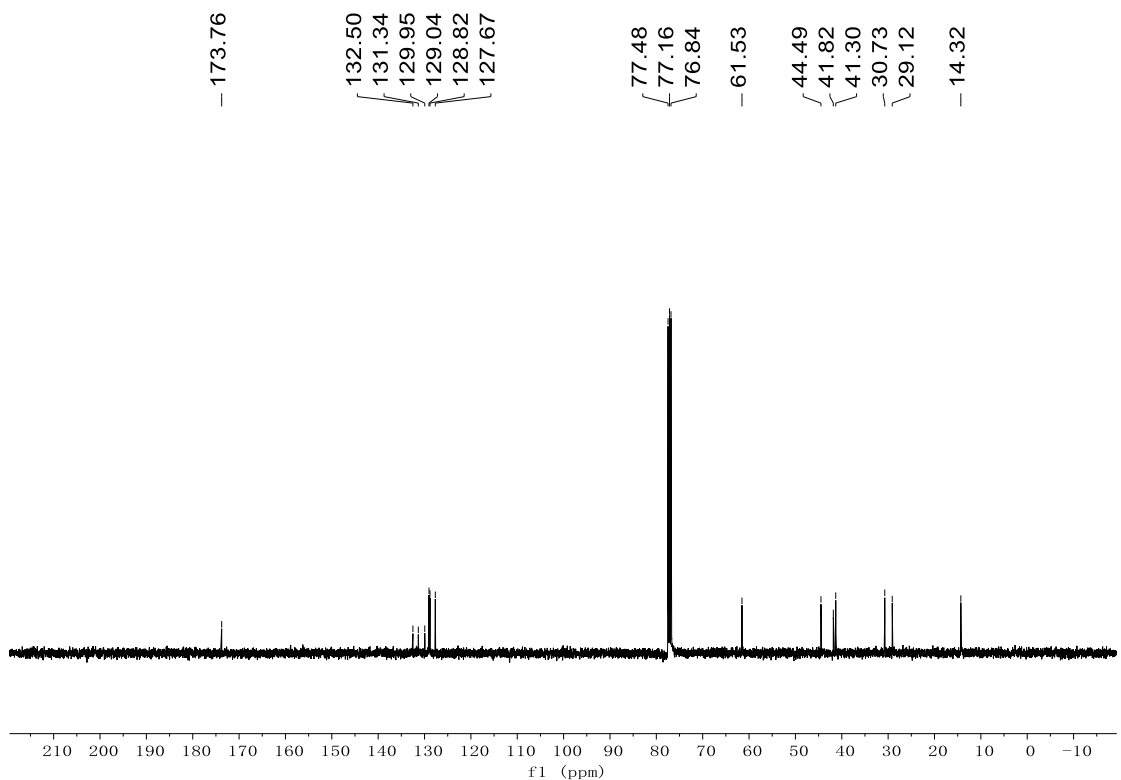



68

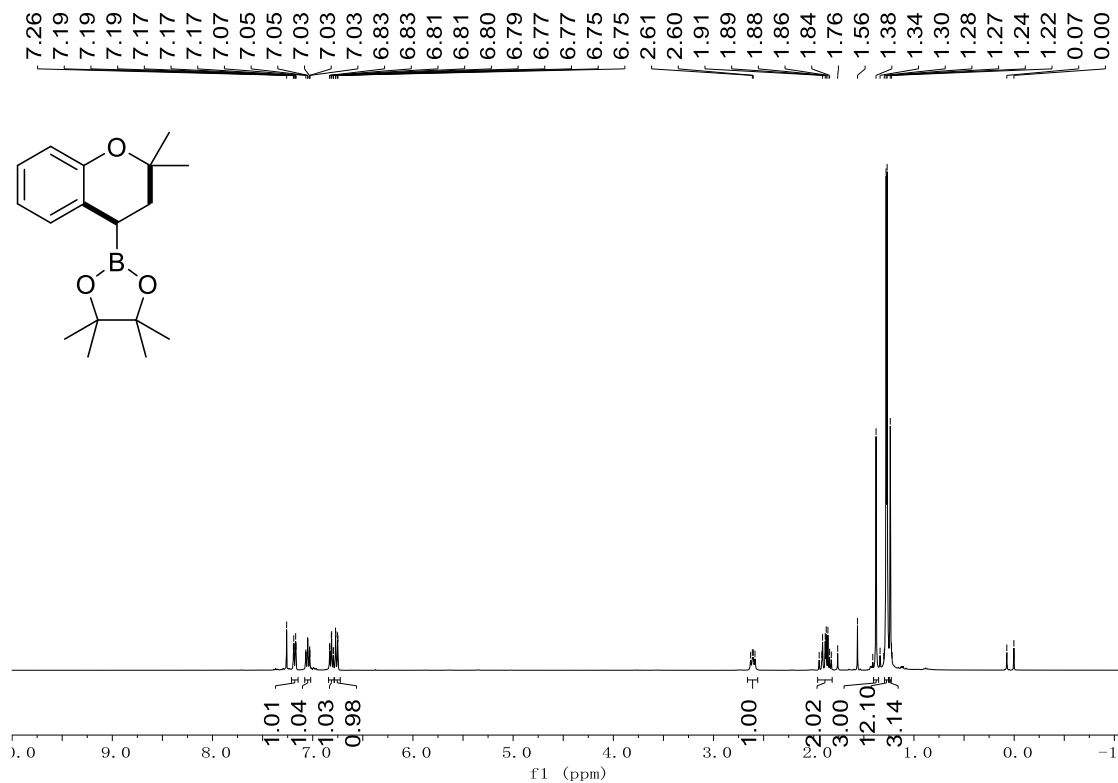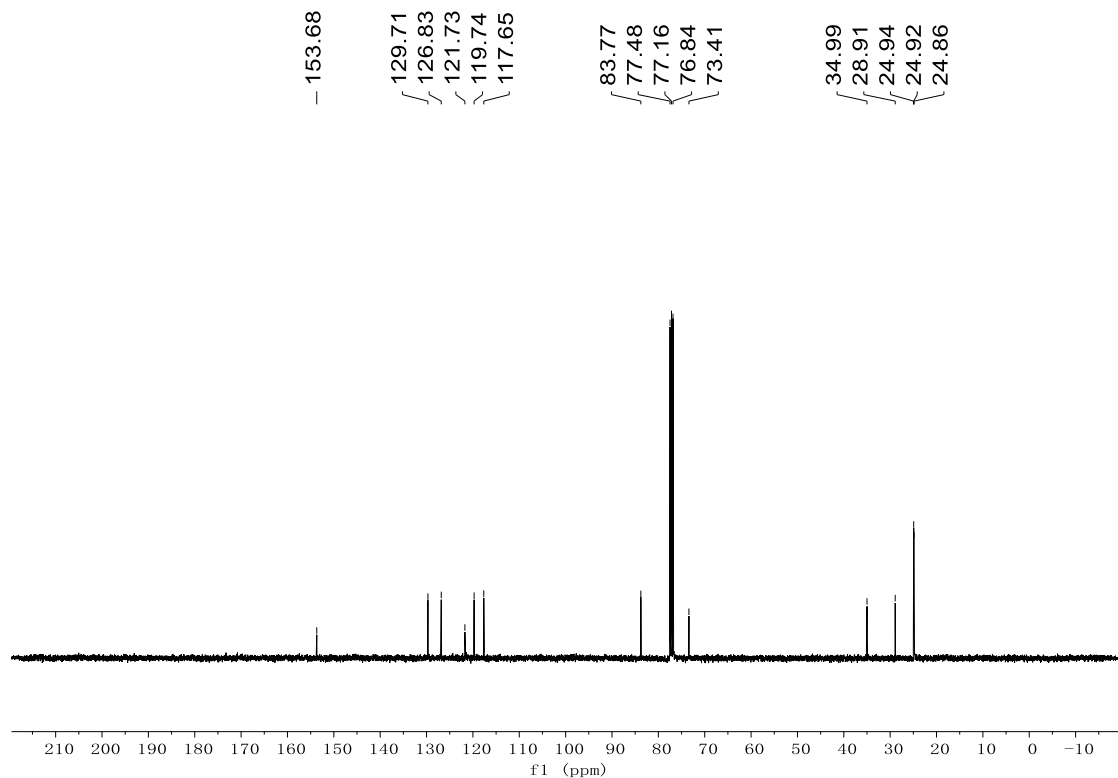

69

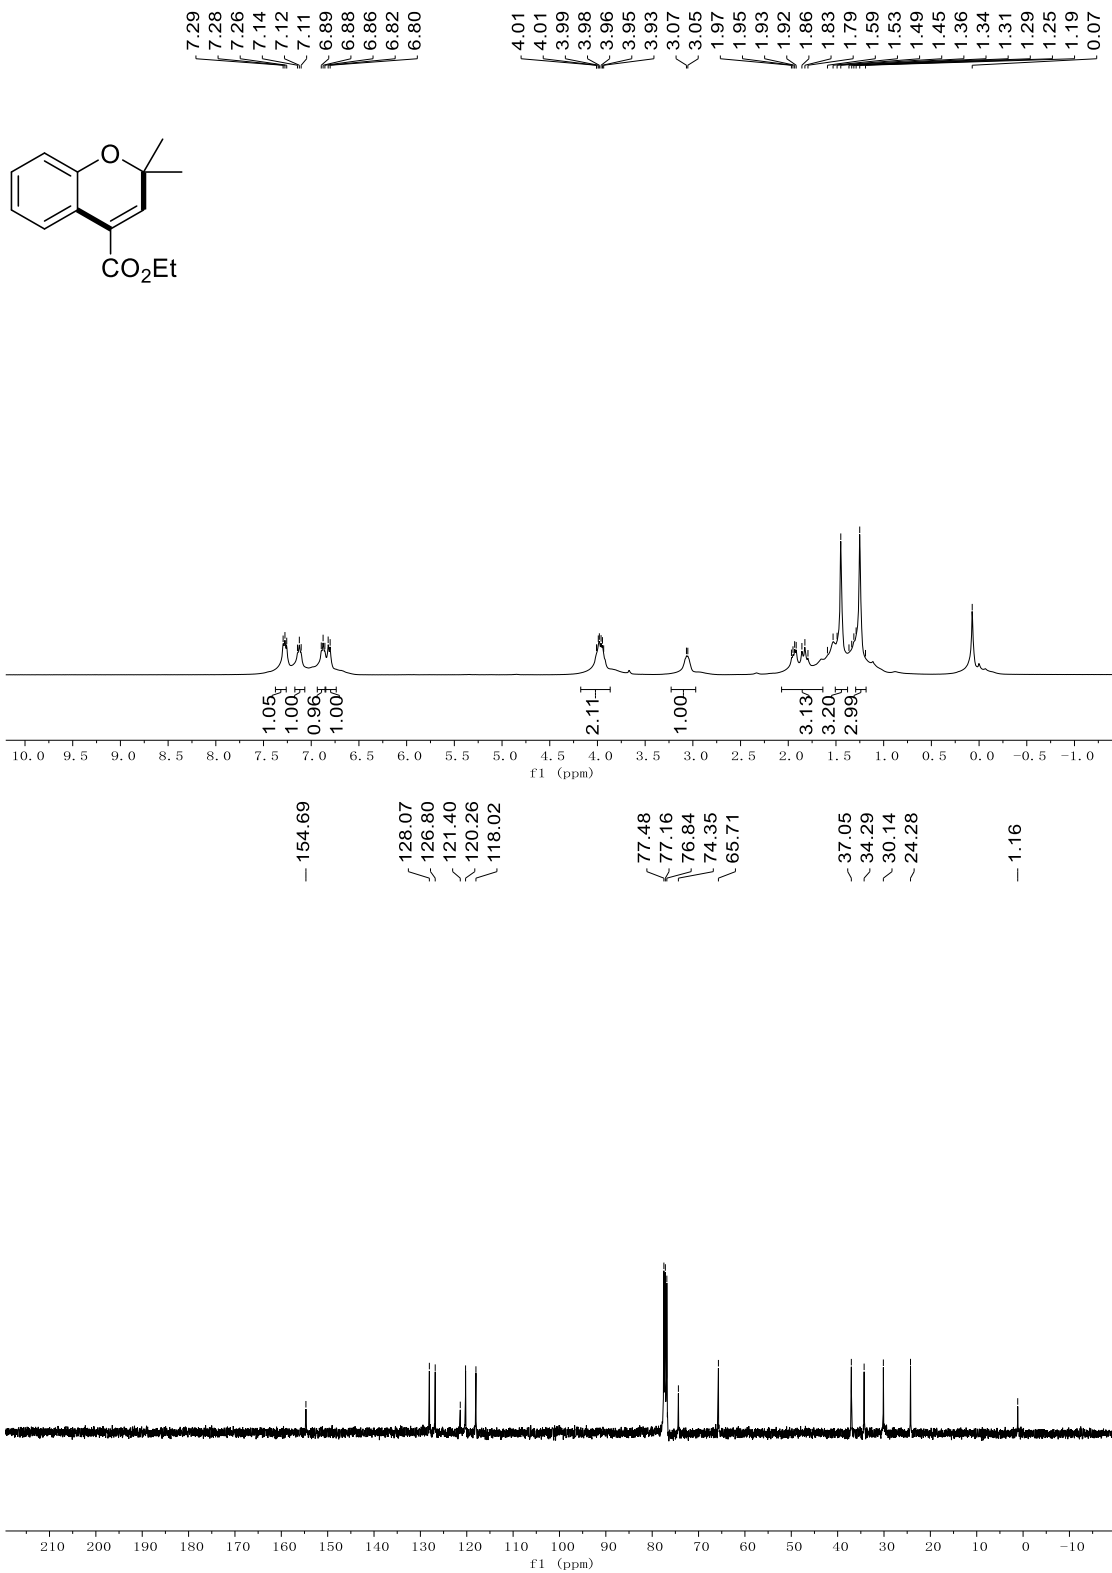

70

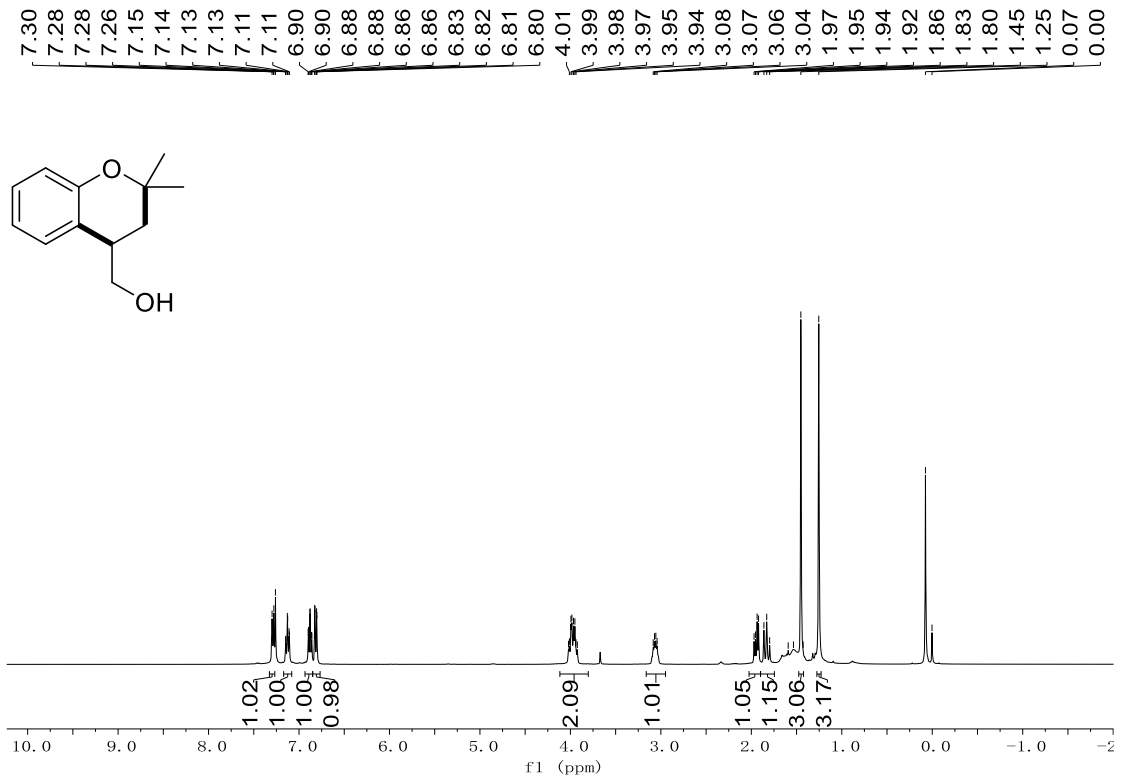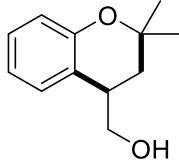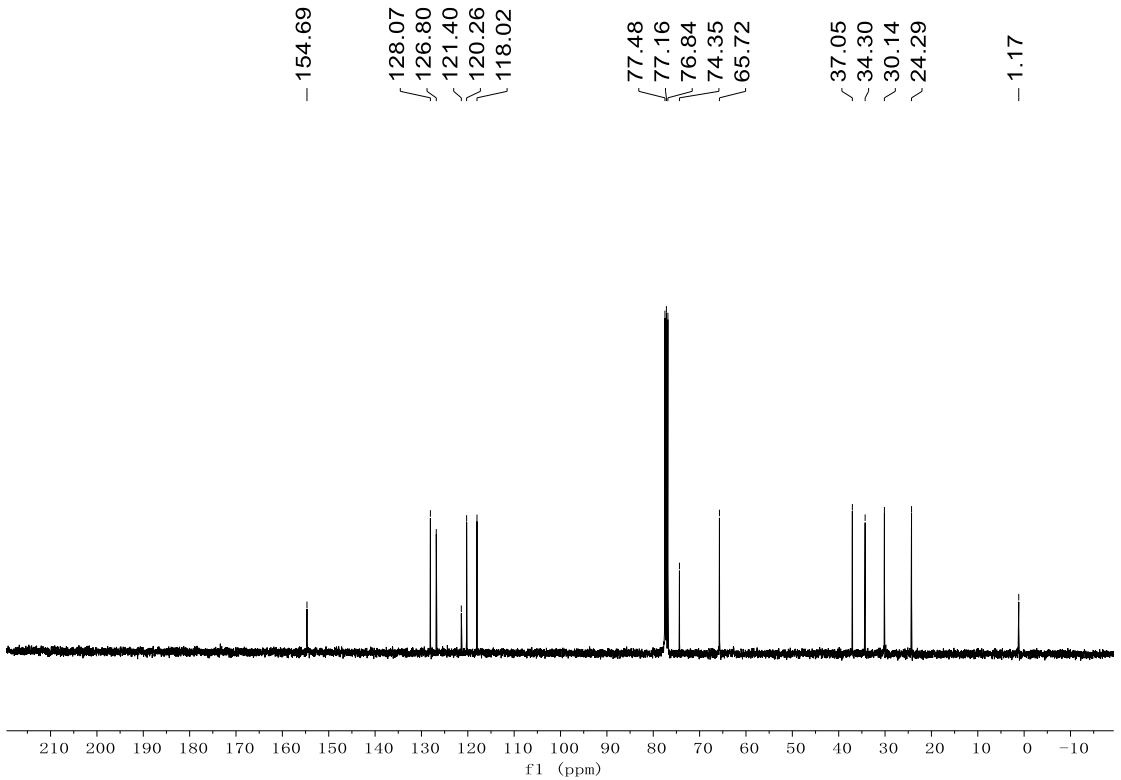

71

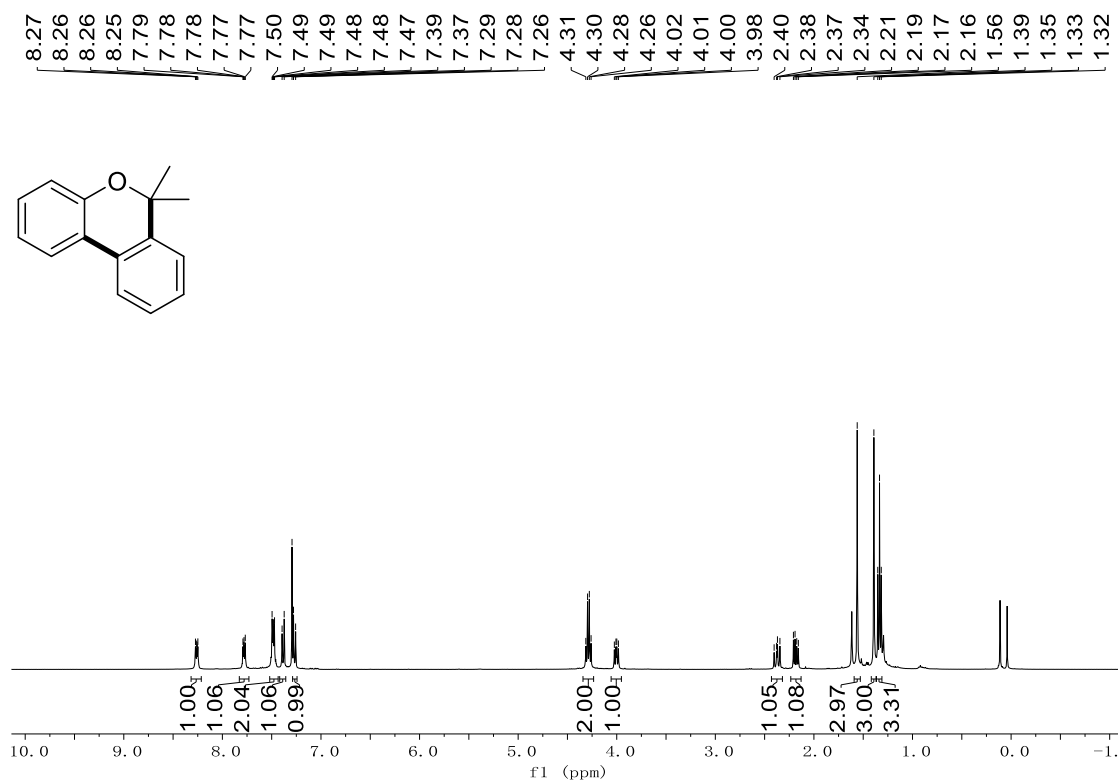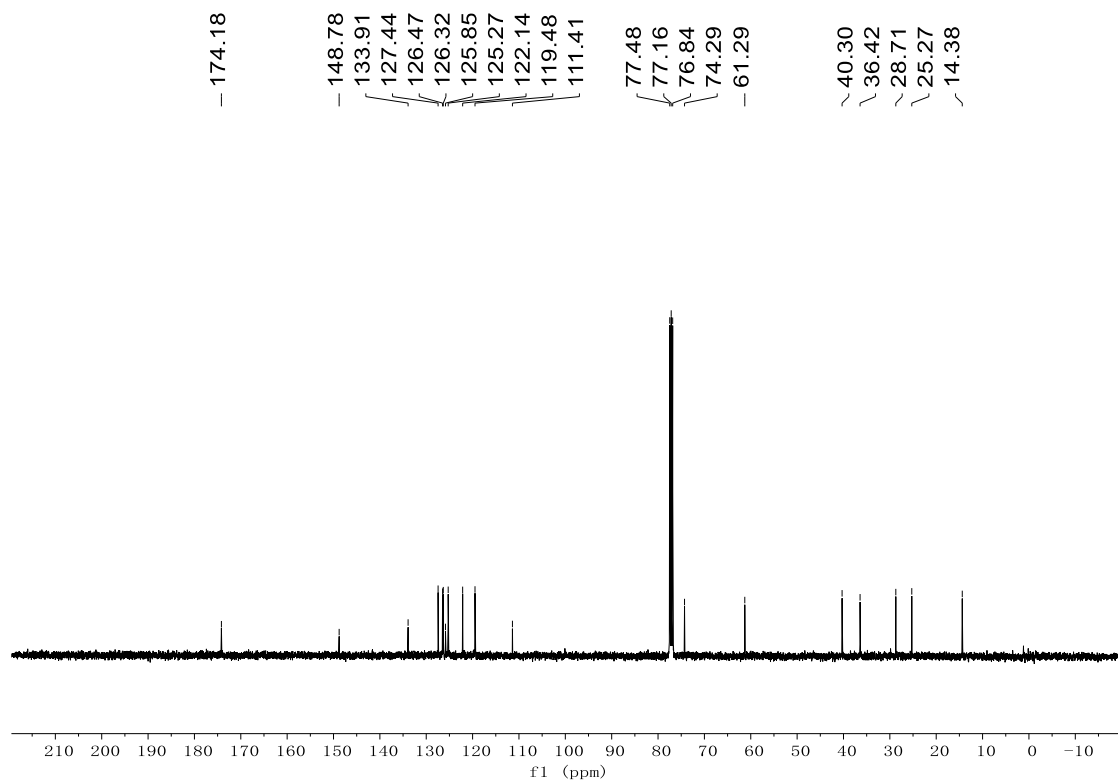

**<sup>1</sup>H NMR spectrum of desired product from KIE experiment.**

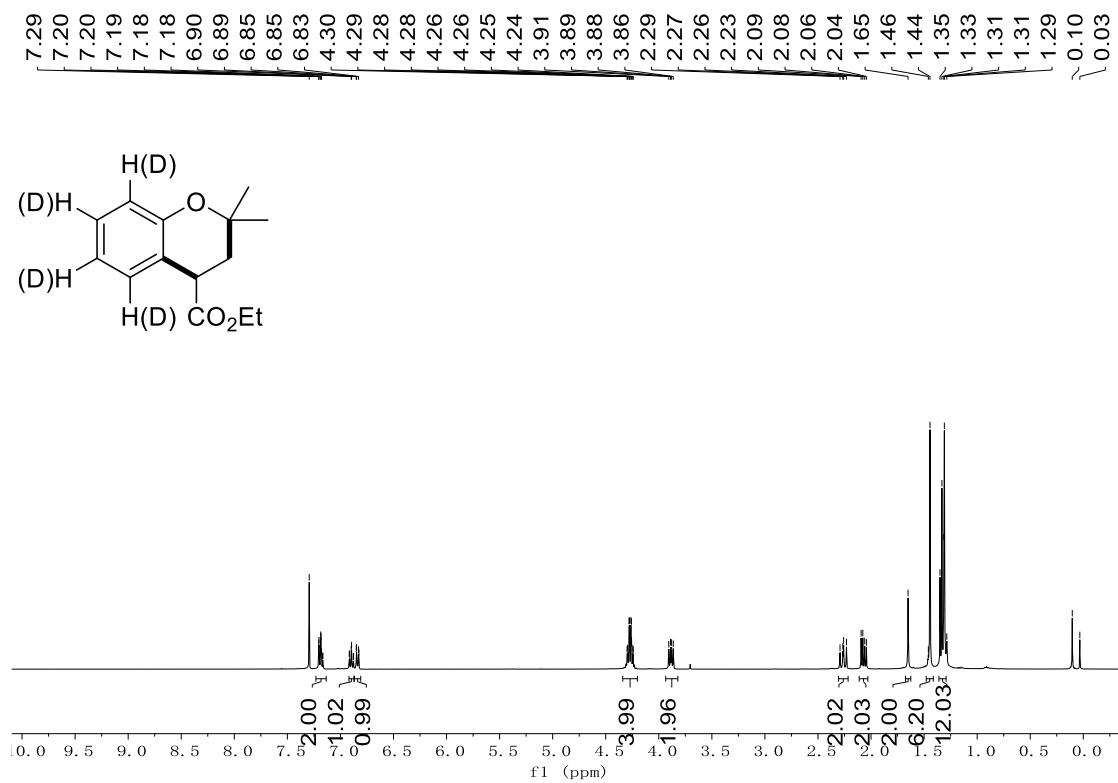

Supplement: d2sc00903j1.pdf [file d2sc00903j1.pdf]
